# Supplementary material for: The acinar differentiation determinant PTF1A inhibits initiation of pancreatic ductal adenocarcinoma
Source: eLife journal article supplement (doi:10.7554/elife.07125), 2015-07-07
Supplement: supp [file elife-07125-supp-v1.zip]

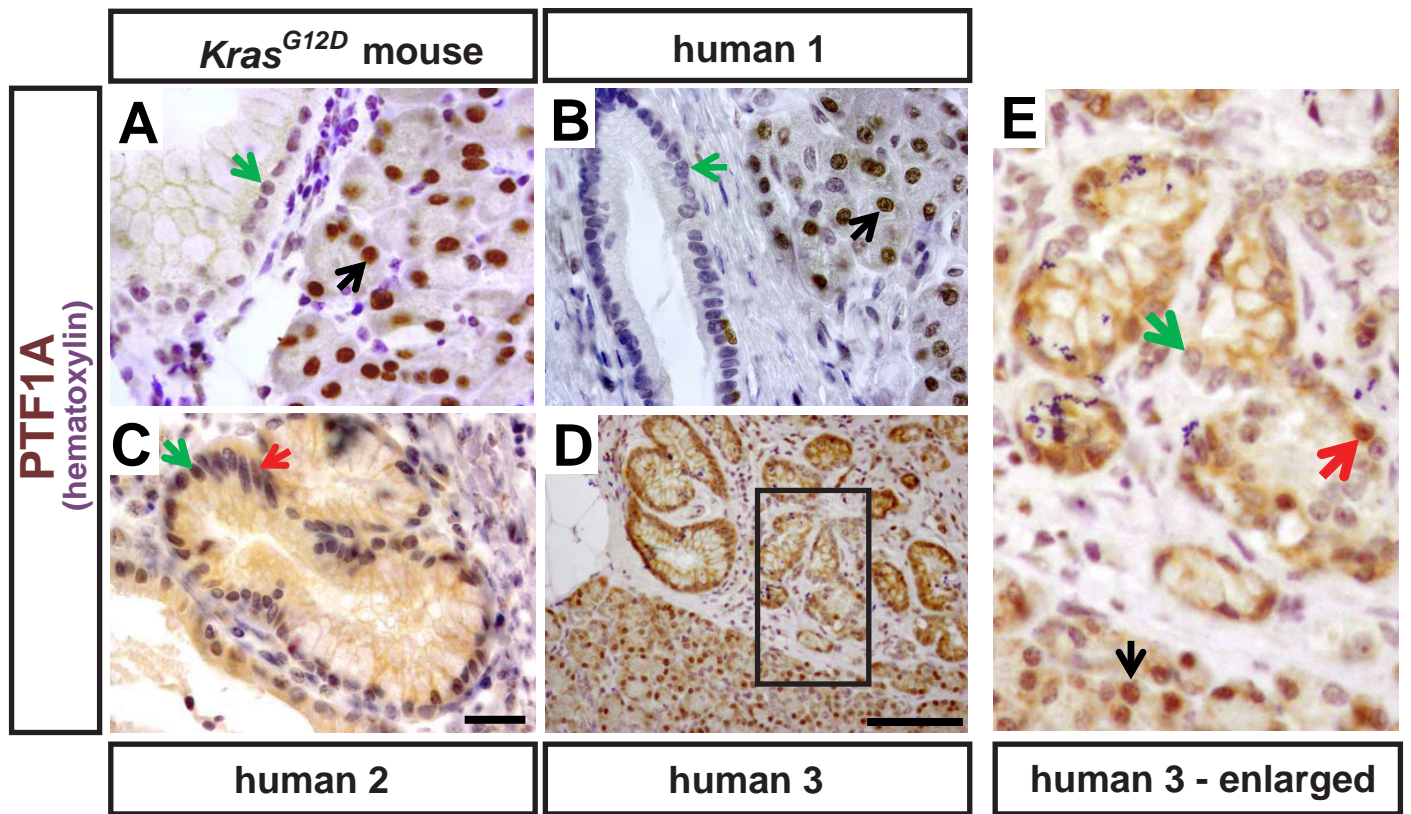

**Figure 1 - supplement 1. PTF1A expression in rare epithelial cells of human PanINs.** (A) IHC for PTF1A from a *Kras*<sup>G12D</sup> mouse pancreas 9 months after TM administration (0.17 mg/g). (B-E) IHC for PTF1A on human pathology samples. Black arrows indicate normal acinar cells expressing PTF1A; green arrows highlight PanIN epithelial cells that do not express PTF1A; red arrows indicate rare PanIN epithelial cells that retain trace PTF1A expression. Scale bars: (A-C) 25 μm; (D) 100 μm.
