# Supplementary material for: The acinar differentiation determinant PTF1A inhibits initiation of pancreatic ductal adenocarcinoma
Source: eLife journal article supplement (doi:10.7554/elife.07125), 2015-07-07
Supplement: supp [file elife-07125-supp-v1.zip]

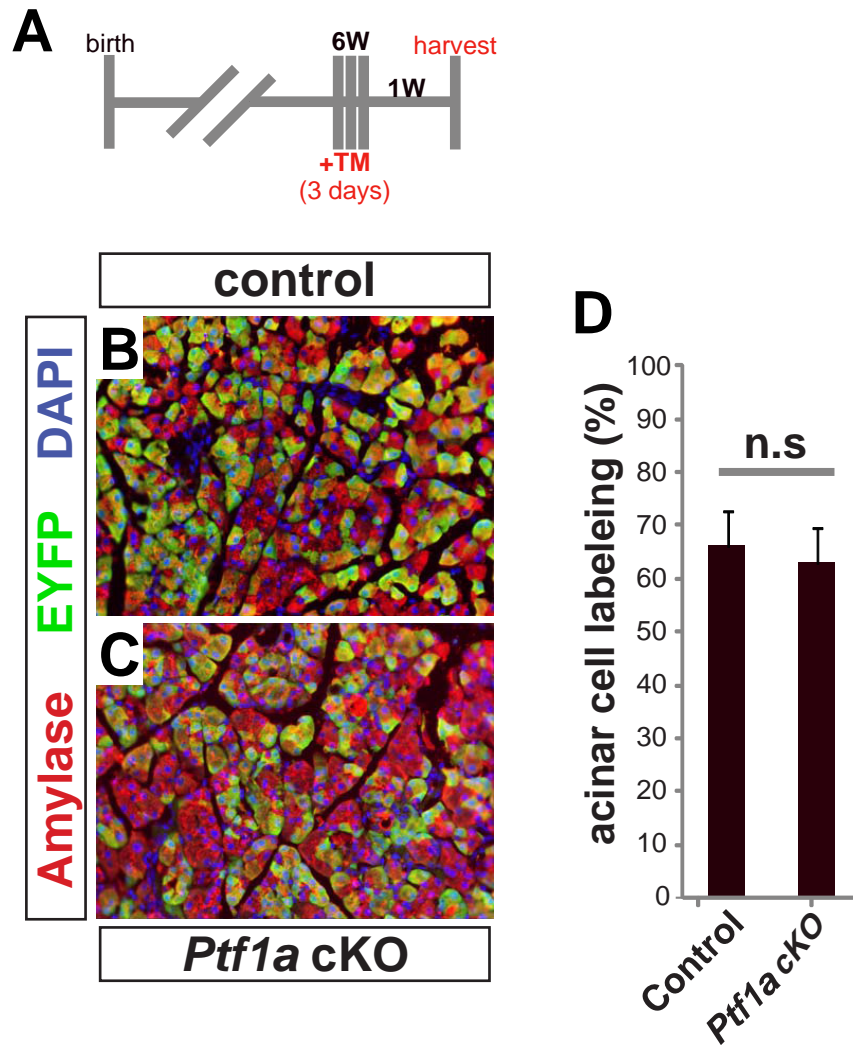

**Figure 4 - figure supplement 1. Cre-mediated recombination rates following high-dose tamoxifen treatment.** (A) 6-8 week old mice were administered 0.17 mg/g TM on three consecutive days, and pancreata were harvested 1 week later. (B-C) Immunofluorescence for amylase (red) and the Cre reporter  $R26R^{EYFP}$  (green) in TM-treated pancreata of the indicated genotypes. (D) The proportion of EYFP expression within amylase+ acinar cells was quantified for all genotypes. No significant difference was observed between groups (n=3-4 per genotype). Scale bar: 100  $\mu$ m.
