# Supplementary material for: The acinar differentiation determinant PTF1A inhibits initiation of pancreatic ductal adenocarcinoma
Source: eLife journal article supplement (doi:10.7554/elife.07125), 2015-07-07
Supplement: supp [file elife-07125-supp-v1.zip]

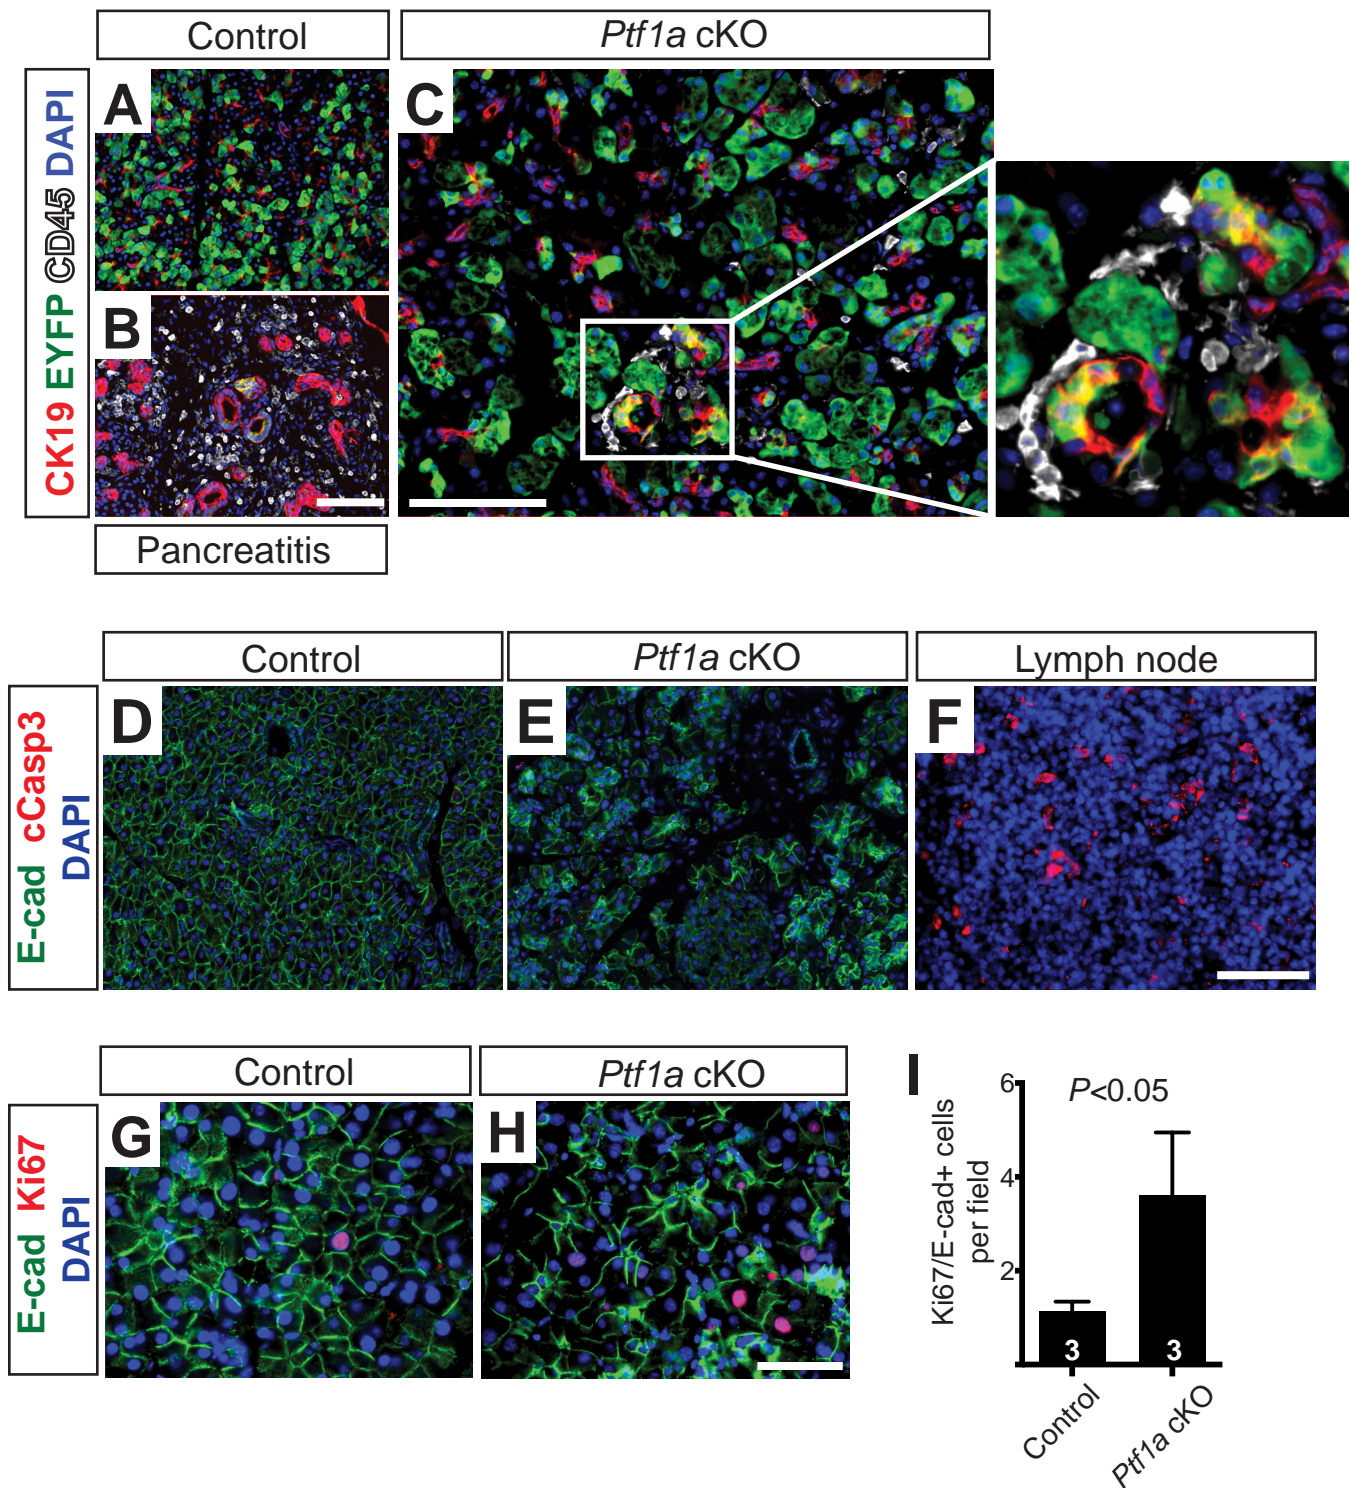

**Figure 4 – supplement 2. Loss of *Ptf1a* promotes pancreatic epithelial transdifferentiation and proliferation.** (A-C) Immunofluorescence for CK19 (red), the Cre reporter Rosa26<sup>EYFP</sup> (green), and CD45 (white) in *Ptf1a* cKO pancreata, 2 weeks after high-dose TM administration. Caerulein-treated *Ptf1a* cKO pancreas included as control for pancreatitis (B). Enlarged boxed area highlights EYFP+ acinar cells expressing CK19, surrounded by CD45+ leukocytes. (D-E) Immunofluorescence for E-cadherin (green), cleaved Caspase-3 (red) and DAPI (blue) in control and *Ptf1a* cKO pancreata. (F) Pancreatic lymph node, positive control for cleaved Caspase-3 staining. (G-H) Immunofluorescence for E-cadherin (green), Ki67 (red) and DAPI (blue). (I) Quantification of Ki67+/E-cadherin+ cells per 40x field (n=3 per group,  $P < 0.05$ ). Scale bars: (A-F) 100  $\mu$ m, (G-H) 50  $\mu$ m.
