# Supplementary material for: The acinar differentiation determinant PTF1A inhibits initiation of pancreatic ductal adenocarcinoma
Source: eLife journal article supplement (doi:10.7554/elife.07125), 2015-07-07
Supplement: supp [file elife-07125-supp-v1.zip]

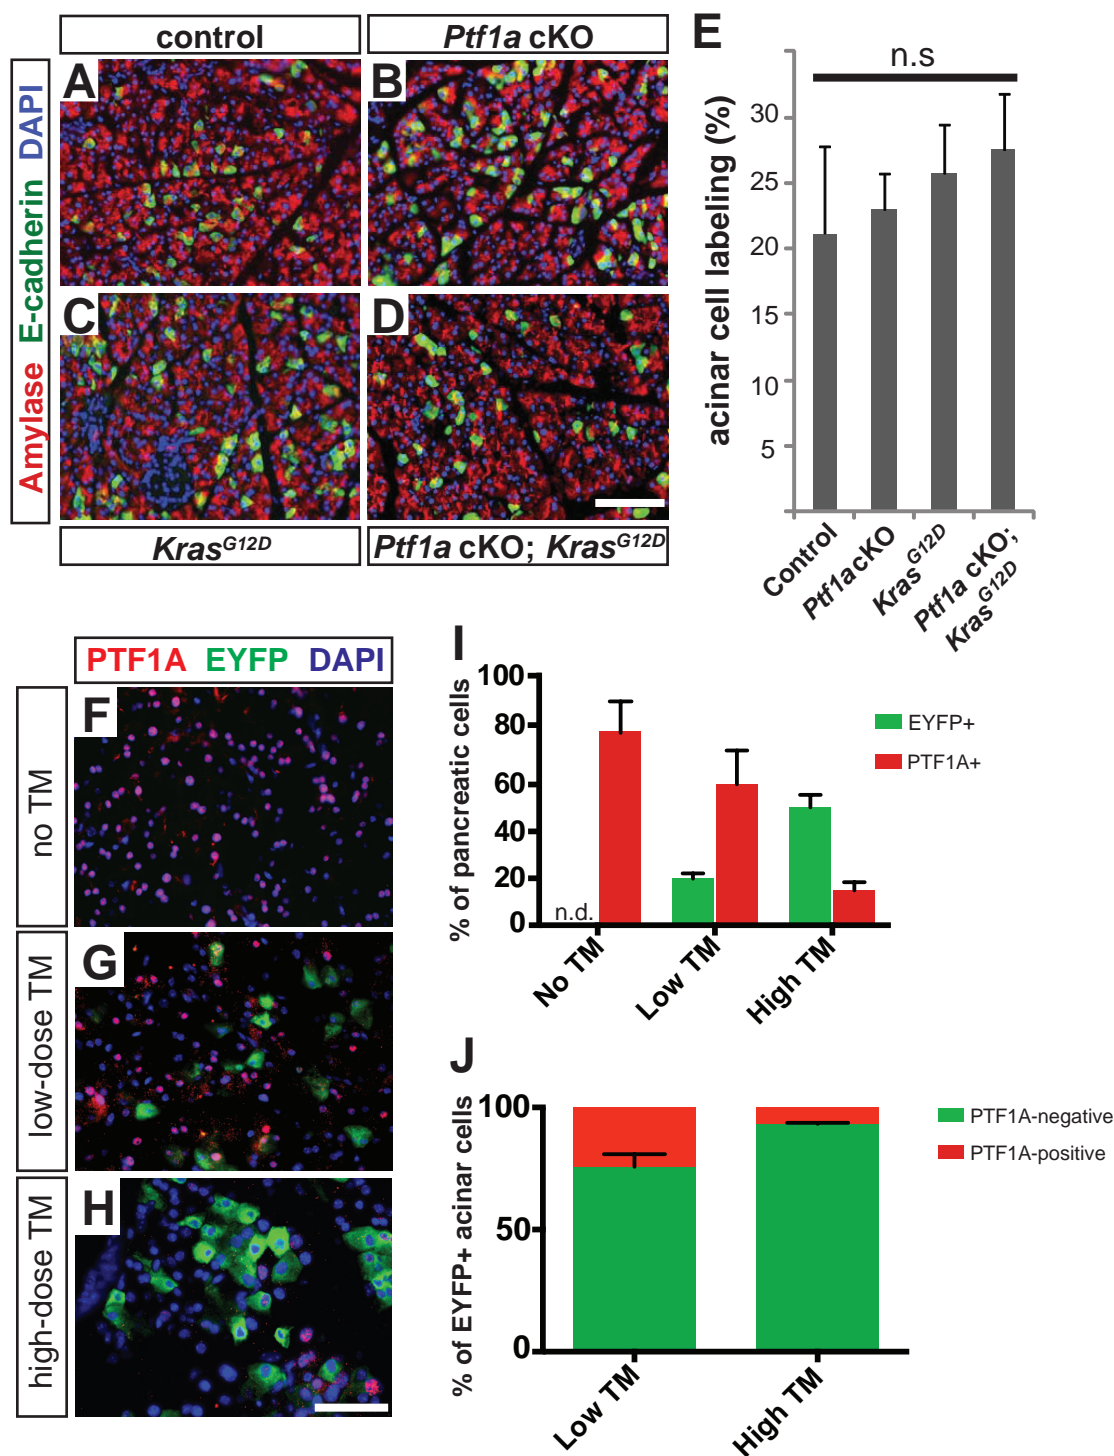

**Figure 2 – supplement 2. *Ptf1a*<sup>CreERT</sup> deletion efficiency following tamoxifen treatment.** 6-8-week-old mice of indicated genotypes were administered according to low- or high-dose regimens (1x0.17 mg/g or 0.25 mg/g, respectively), and pancreata were harvested 2 weeks (A-E) or 3 days (F-J) after the last dose. (A-D) Immunofluorescence for amylase (red) and the Cre reporter *R26R*<sup>EYFP</sup> (green) on pancreata from low-TM treated mice of the indicated genotypes. For *Ptf1a* cKO; *Kras*<sup>G12D</sup> pancreata, efforts were made to find histologically normal areas to provide an accurate quantification of Cre-mediated recombination. (E) The proportion of EYFP expression among amylase+ acinar cells was quantified for all genotypes. No significant difference was noted between any groups (n=3-6 per genotype). (F-H) Immunofluorescence for PTF1A (red), the Cre reporter EYFP (green), and DAPI (blue) in *Ptf1a*<sup>CreERT/lox+</sup>; *Kras*<sup>G12D</sup>; *R26R*<sup>EYFP/+</sup> mice three days after no TM administration (A), low dose TM (B), or high dose TM (C). (I) Quantification of the percentage of EYFP+ (green) and Ptf1a+ (red) pancreatic cells in each indicated treatment group three days after final TM administration (n=3 per group). (J) Quantification of total EYFP+ acinar cells that no longer express Ptf1a (green) or retain Ptf1a protein expression (red) 3 days following low and high TM treatment (n=3 per group). Scale bars: (A-D) 100  $\mu$ m, (F-H) 50  $\mu$ m.
