# Supplementary material for: The acinar differentiation determinant PTF1A inhibits initiation of pancreatic ductal adenocarcinoma
Source: eLife journal article supplement (doi:10.7554/elife.07125), 2015-07-07
Supplement: supp [file elife-07125-supp-v1.zip]

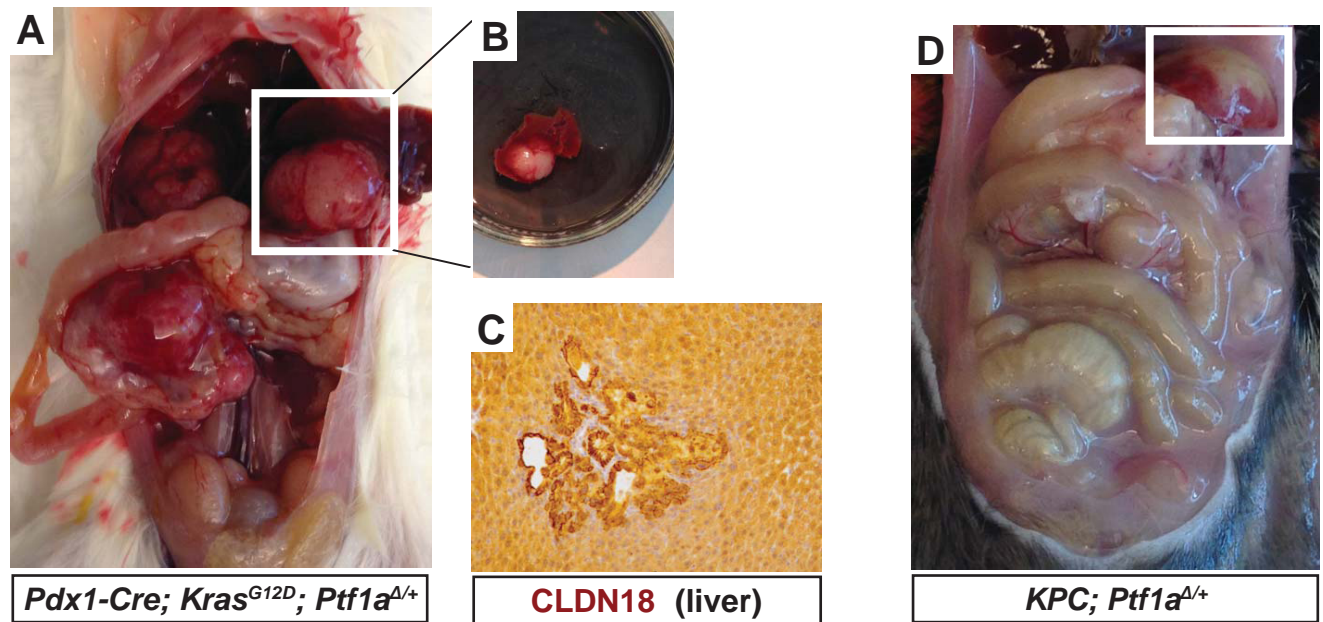

**Figure 7 - figure supplement 1. Liver metastases in KPC mice heterozygous for *Ptf1a*.** (A) Gross image of a *Pdx1-Cre; Kras<sup>G12D</sup>; Ptf1a<sup>+/-</sup>* mouse harboring metastatic pancreatic cancer. White box highlights large liver metastasis. (B) Dissected lobe of the liver with pancreatic liver metastasis. (C) IHC for CLDN18 confirmed liver metastases in a subset of *Pdx1-Cre; Kras<sup>G12D</sup>; p53<sup>+/-</sup>; Ptf1a<sup>+/-</sup>* mice. (D) Gross image of *Pdx1-Cre; Kras<sup>G12D</sup>; p53<sup>+/-</sup>; Ptf1a<sup>+/-</sup>* mouse harboring metastatic PDAC. White box highlights liver metastasis.
