# Supplementary material for: The acinar differentiation determinant PTF1A inhibits initiation of pancreatic ductal adenocarcinoma
Source: eLife journal article supplement (doi:10.7554/elife.07125), 2015-07-07
Supplement: supp [file elife-07125-supp-v1.zip]

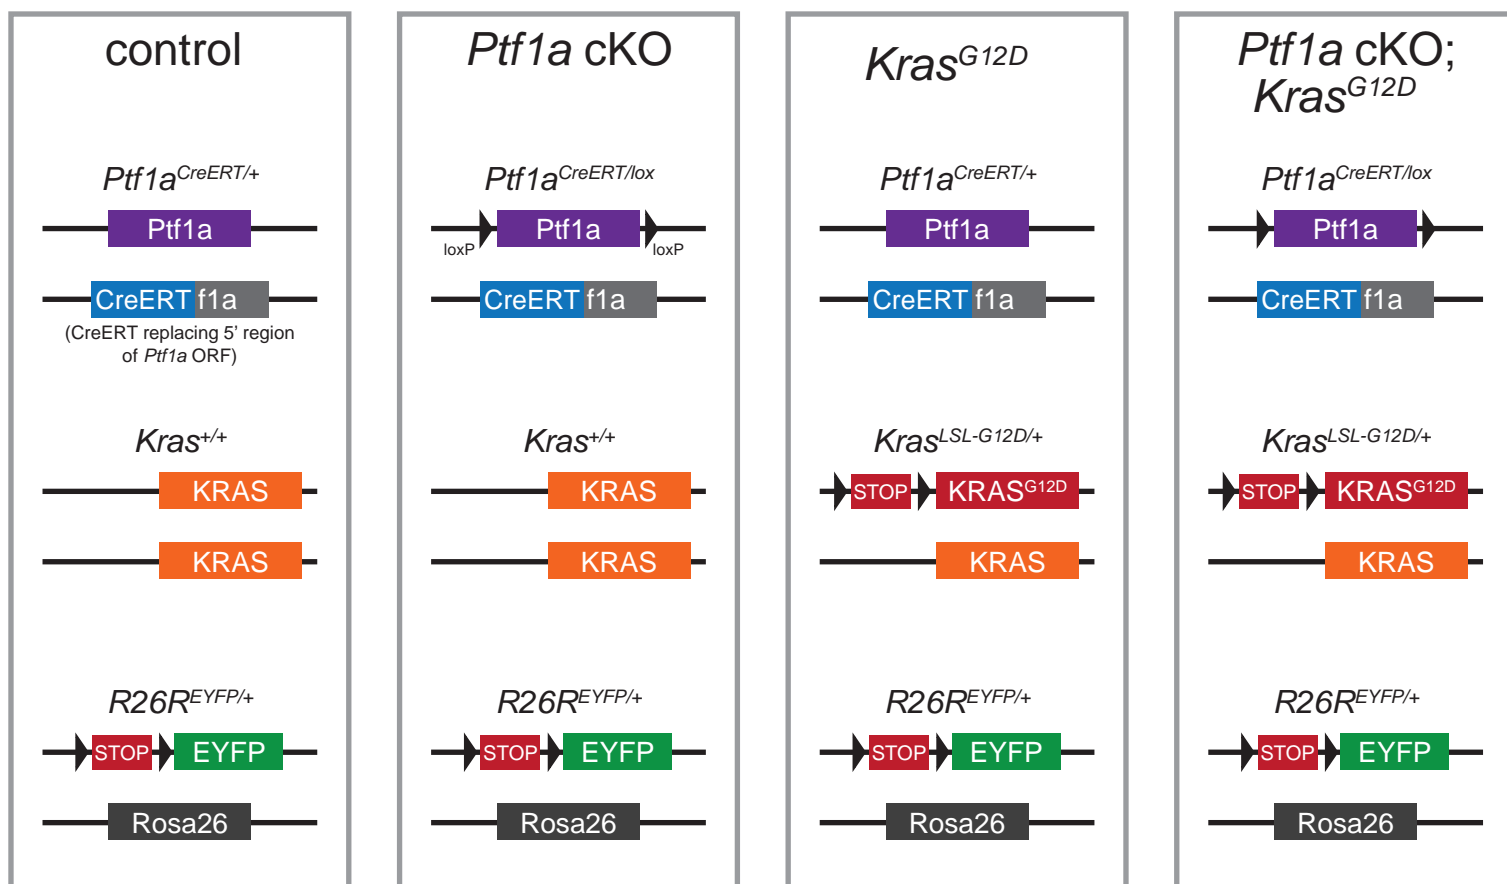

**Figure 2 – supplement 1. Schematic of mouse alleles used in this study.** Schematic representations of the alleles present in the genotypes referred to, in shorthand, as control, *Ptf1a* cKO, *Kras*<sup>G12D</sup> and *Ptf1a* cKO; *Kras*<sup>G12D</sup> (see Table 1 for additional details).
