# Supplementary material for: The acinar differentiation determinant PTF1A inhibits initiation of pancreatic ductal adenocarcinoma
Source: eLife journal article supplement (doi:10.7554/elife.07125), 2015-07-07
Supplement: supp [file elife-07125-supp-v1.zip]

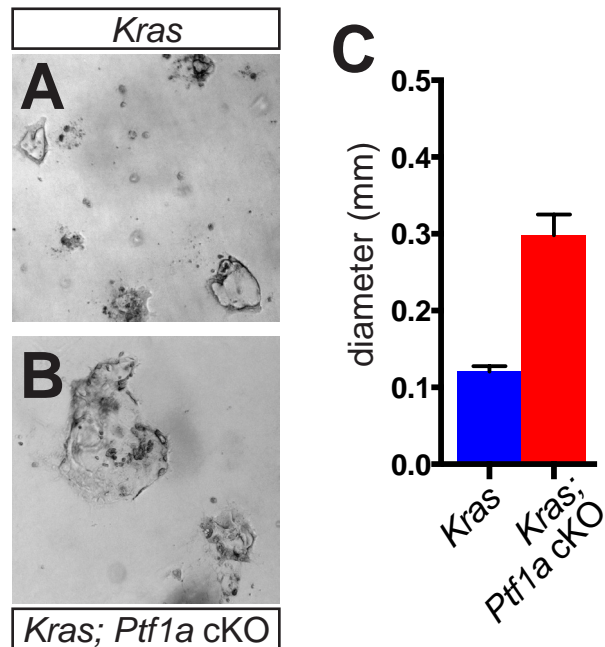

**Figure 3 – supplement 2. Acinar-ductal reprogramming in 3D culture. (A-B)** Brightfield images of acinar-derived ductal cysts from **(A)** *Kras*<sup>G12D</sup> and **(B)** *Ptf1a* cKO; *Kras*<sup>G12D</sup> mice, after 3 days of culture in collagen gel. **(C)** Quantification of the maximum diameter of acinar-derived cysts from mice of indicated genotypes (n=3 mice per genotype). For each mouse, >10 randomly selected fields were photographed, and each cyst within the image was measured at its maximum diameter. Scale bars are 400  $\mu$ m.
