# Supplementary material for: The acinar differentiation determinant PTF1A inhibits initiation of pancreatic ductal adenocarcinoma
Source: eLife journal article supplement (doi:10.7554/elife.07125), 2015-07-07
Supplement: supp [file elife-07125-supp-v1.zip]

Archive with 15 entries (15 files):
- elife_poa_e07125_Figure_3_figure_supplement_2.pdf
- elife_poa_e07125_Supplementary_File_2.xls
- elife_poa_e07125_Supplementary_File_4.xls
- elife_poa_e07125_Supplementary_File_1.html
- elife_poa_e07125_Figure_2_figure_supplement_1.pdf
- elife_poa_e07125_Supplementary_File_5.xls
- elife_poa_e07125_Figure_4_figure_supplement_3.pdf
- elife_poa_e07125_Figure_2_figure_supplement_2.pdf
- elife_poa_e07125_Figure_7_figure_supplement_1.pdf
- elife_poa_e07125_Supplementary_File_3.xls
- elife_poa_e07125_Figure_6_figure_supplement_1.pdf
- elife_poa_e07125_Figure_3_figure_supplement_1.pdf
- elife_poa_e07125_Figure_4_figure_supplement_1.pdf
- elife_poa_e07125_Figure_1_figure_supplement_1.pdf
- elife_poa_e07125_Figure_4_figure_supplement_2.pdf
