# Supplementary material for: The acinar differentiation determinant PTF1A inhibits initiation of pancreatic ductal adenocarcinoma
Source: eLife journal article supplement (doi:10.7554/elife.07125), 2015-07-07
Supplement: supp [file elife-07125-supp-v1.zip › elife_poa_e07125_Figure_3_figure_supplement_1.pdf]

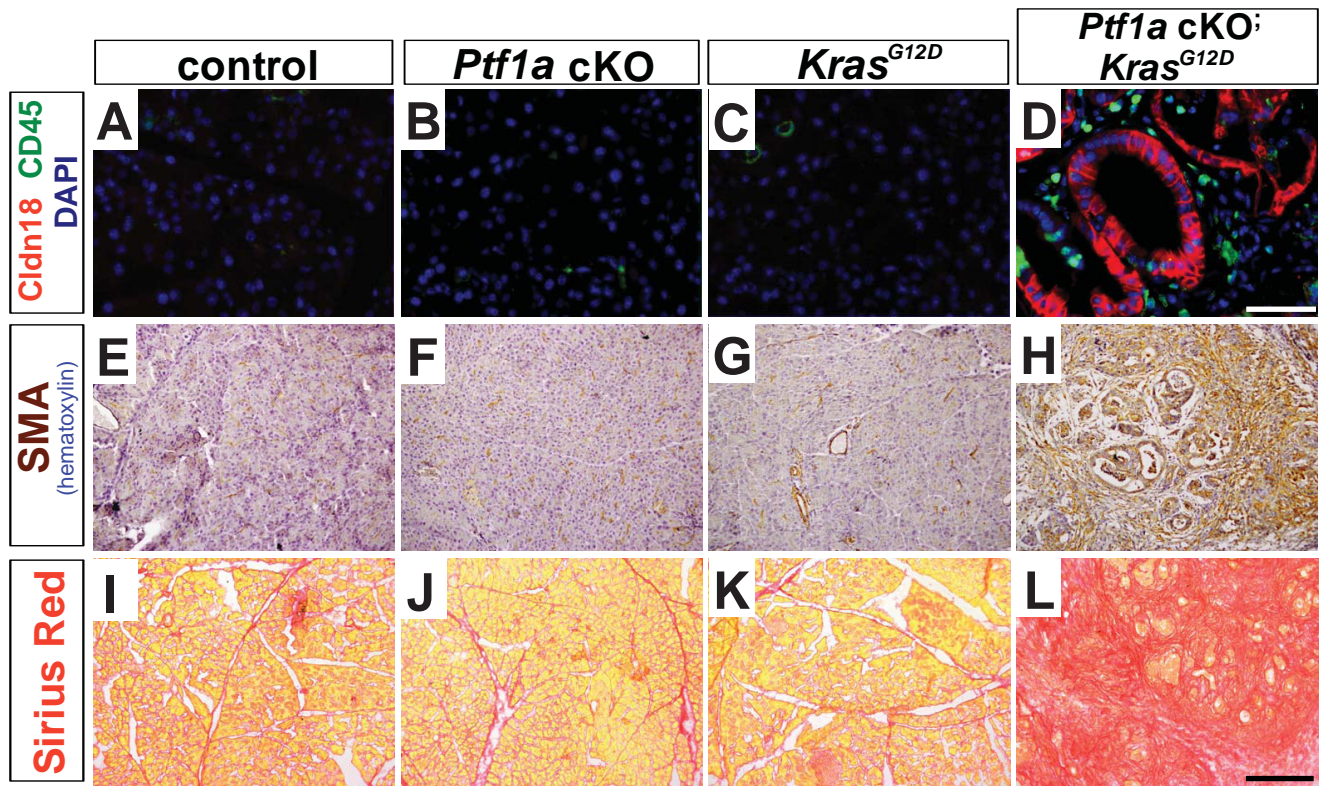

**Figure 3 – supplement 1. Microenvironmental remodeling in *Ptf1a* cKO; *Kras*<sup>G12D</sup> pancreata.** Pancreata were harvested 2 weeks following TM administration (0.17 mg/g) to mice of the indicated genotypes. **(A-D)** Immunofluorescence for the PanIN marker CLDN18 (red), and the leukocyte marker CD45 (green), revealing association of leukocytes with PanINs in *Ptf1a* cKO; *Kras*<sup>G12D</sup>. **(E-H)** IHC for α-SMA, highlighting the activation of pancreatic stellate cells in *Ptf1a* cKO; *Kras*<sup>G12D</sup> pancreata. **(I-L)** Sirius Red staining, highlighting widespread fibrosis in *Ptf1a* cKO; *Kras*<sup>G12D</sup>. Scale bars: (A-D) 50 μm, (E-L) 200 μm.
