# Supplementary material for: The acinar differentiation determinant PTF1A inhibits initiation of pancreatic ductal adenocarcinoma
Source: eLife journal article supplement (doi:10.7554/elife.07125), 2015-07-07
Supplement: supp [file elife-07125-supp-v1.zip › elife_poa_e07125_Figure_4_figure_supplement_3.pdf]

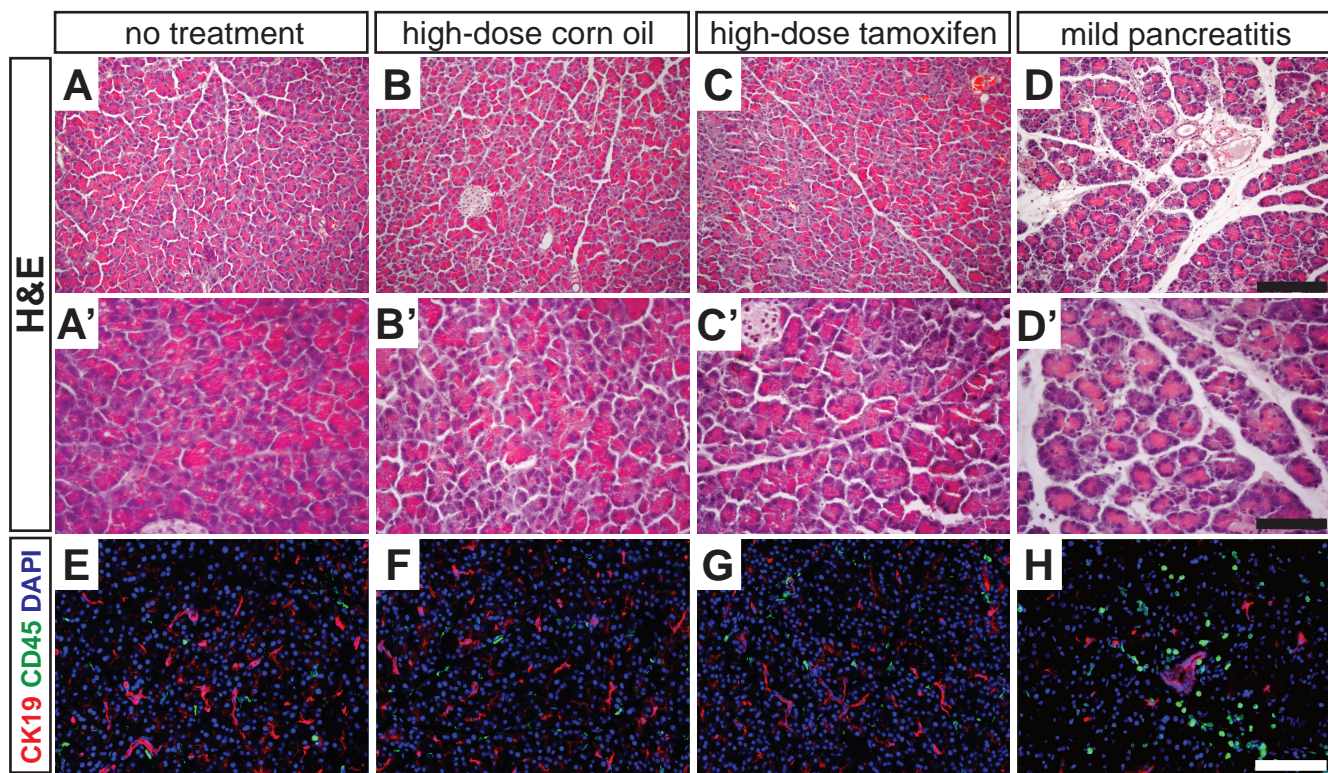

**Figure 4 – supplement 3. High-dose tamoxifen administration does not induce pancreatitis. (A-D)** Low- and **(A'-D')** high-magnification H&E staining of wild-type pancreata, fixed 24 hours after indicated treatment. **(E-H)** Immunofluorescence for CK19 (red), CD45 (green) and DAPI (blue), highlighting inflammatory cells in the exocrine pancreas. Scale bars: (A-D) 200  $\mu$ m, (A'-D') 100  $\mu$ m, (E-H) 50  $\mu$ m.
