# Supplementary material for: The acinar differentiation determinant PTF1A inhibits initiation of pancreatic ductal adenocarcinoma
Source: eLife journal article supplement (doi:10.7554/elife.07125), 2015-07-07
Supplement: supp [file elife-07125-supp-v1.zip › elife_poa_e07125_Supplementary_File_2.xls]

## Sheet: diff_exp.txt
Symbol	log.FC	FC	log.CPM	CPM	P.value	FDR
S100g	10.26	1224.97	0.22	1.17	1.02e-17	7.3e-16
Slc9a4	8.78	439.22	-1.07	0.47	3.47e-12	1.12e-10
Pga5	6.74	106.78	10.73	1697.6	3.35e-39	1.81e-36
Glycam1	6.66	101.37	0.33	1.26	0.00106483	0.00572503
Chia	6.6	96.79	9.35	653.29	2.63e-35	1.12e-32
Fgl1	6.57	94.94	1.2	2.29	2.18e-25	4.07e-23
Gcnt3	6.48	89.52	2.74	6.69	3.64e-56	5.33e-53
Itln1	6.21	73.78	-0.83	0.56	3.05e-13	1.19e-11
Vwce	6.14	70.63	-0.87	0.55	6.86e-07	9.24e-06
Gif	6.12	69.66	8.32	320.08	2.84e-56	4.86e-53
2210407C18Rik	6.12	69.48	0.78	1.71	2.05e-26	4.11e-24
Gkn3	6.08	67.52	9.76	868.1	7.47e-64	3.83e-60
Kcnj15	6.05	66.31	2.78	6.87	6.5e-53	7.4e-50
Slc1a2	5.96	62.2	0.9	1.87	6.44e-40	4.12e-37
Fxyd3	5.93	61.14	0.85	1.8	2.37e-18	1.84e-16
Anxa10	5.86	57.89	-1.11	0.46	3.03e-06	3.51e-05
Ndnf	5.76	54.28	-1.21	0.43	1.59e-10	4.01e-09
Pgc	5.44	43.49	5.75	53.95	4.86e-25	8.59e-23
Ttr	5.44	43.46	9.21	592.99	4.65e-21	5.36e-19
Spp1	5.43	43.19	9.36	658.04	1.2e-28	2.68e-26
Ppp1r3a	5.37	41.45	0.35	1.27	4.5e-14	2.06e-12
Fut2	5.37	41.45	-0.28	0.83	1.47e-11	4.26e-10
Abcc2	5.36	41.02	0.06	1.04	2.3e-23	3.41e-21
Ifi27l2b	5.31	39.78	2.12	4.36	1.16e-52	1.19e-49
Muc5ac	5.31	39.74	0.9	1.86	6.44e-34	2.36e-31
Thbs1	5.25	38.04	5.94	61.4	7.34e-51	6.84e-48
Tspan1	5.02	32.44	3.05	8.27	5.35e-68	5.49e-64
Vsig2	4.94	30.61	2.98	7.88	4.23e-57	1.08e-53
Gpx2	4.89	29.72	-0.65	0.64	1.73e-10	4.34e-09
Marco	4.64	24.9	-0.92	0.53	0.000161705	0.00114603
Cfi	4.58	23.86	0.07	1.05	5.2e-14	2.33e-12
Tspan8	4.57	23.72	-0.97	0.51	7.24e-06	7.61e-05
Kcnip3	4.55	23.41	0.77	1.71	4.76e-18	3.54e-16
Azgp1	4.54	23.19	0.39	1.31	2.12e-13	8.54e-12
Chi3l4	4.54	23.29	-1	0.5	1.36e-08	2.42e-07
Serpina5	4.44	21.64	-0.37	0.77	0.000133746	0.000970015
Slc9b2	4.43	21.56	-0.26	0.84	1.01e-12	3.59e-11
Tmc7	4.3	19.68	1.12	2.17	4.94e-48	4.22e-45
Gm10768	4.29	19.53	-0.89	0.54	1.18e-10	3.02e-09
Gdf9	4.23	18.81	-0.11	0.93	1.81e-09	3.73e-08
Slc22a1	4.19	18.26	-0.96	0.51	1.07e-10	2.78e-09
Sctr	4.15	17.72	1.54	2.91	6.77e-56	8.68e-53
5830417I10Rik	4.15	17.75	-0.51	0.7	6.41e-13	2.35e-11
Kcnj13	4.13	17.45	-0.23	0.85	1.72e-10	4.31e-09
Kcne2	4.03	16.3	-1.1	0.47	2.26e-08	3.86e-07
9130230L23Rik	4.01	16.15	0.46	1.38	2.03e-24	3.35e-22
Hmgcs2	4	16.03	2.49	5.62	6.9e-57	1.41e-53
Syt12	3.89	14.78	-0.73	0.6	1.26e-12	4.39e-11
Sidt1	3.88	14.71	0.34	1.27	3.75e-24	6.1e-22
Gm684	3.88	14.68	-0.49	0.71	1.44e-09	3.06e-08
Shisa2	3.8	13.9	-0.41	0.75	1.4e-12	4.86e-11
Pdk4	3.8	13.93	-0.46	0.72	1.02e-05	0.000102599
A730046J19Rik	3.77	13.64	1.29	2.44	0.00217578	0.0103709
Ugt2b35	3.73	13.3	0.37	1.3	3.99e-16	2.34e-14
Cfd	3.72	13.15	1.33	2.51	6.15e-09	1.16e-07
Soat1	3.66	12.64	2.42	5.36	7.71e-43	6.07e-40
Amica1	3.66	12.6	-0.94	0.52	1.13e-09	2.43e-08
Rsph9	3.57	11.87	1.15	2.22	2.31e-20	2.46e-18
Reg3g	3.56	11.79	2.67	6.36	3.25e-39	1.81e-36
Ccl5	3.41	10.64	-0.96	0.51	0.00039899	0.00249168
Golm1	3.31	9.92	1.71	3.28	4.3e-33	1.42e-30
Gm1966	3.29	9.78	-1.24	0.42	0.000555507	0.00328876
Fyb	3.19	9.14	-1.12	0.46	1.79e-07	2.71e-06
Akr1c19	3.17	8.99	-0.83	0.56	3.1e-10	7.31e-09
Nptx2	3.17	9.01	-1.15	0.45	0.000321851	0.00206274
Nt5e	3.13	8.74	-0.59	0.66	0.000478835	0.00290361
Tox	3.11	8.65	1.07	2.09	9.21e-31	2.62e-28
Sec16b	3.1	8.55	1.85	3.6	5.3e-21	5.97e-19
Tenm4	3.1	8.57	-0.29	0.82	1.72e-08	3e-07
Col27a1	3.01	8.05	1.65	3.13	2.47e-11	6.95e-10
9130008F23Rik	2.99	7.93	-1.08	0.47	4.11e-06	4.58e-05
Acap1	2.99	7.95	-0.86	0.55	0.00348269	0.015331
Sorcs2	2.95	7.7	-0.68	0.62	8.16e-07	1.08e-05
Apod	2.92	7.55	0.68	1.6	3.05e-19	2.82e-17
Sema4g	2.88	7.37	1.65	3.13	6.92e-36	3.08e-33
Ccl8	2.88	7.36	0.17	1.13	5.62e-05	0.000462561
Il2rb	2.88	7.38	-1.22	0.43	0.000276695	0.00181419
Fes	2.85	7.22	1.48	2.78	2.5e-12	8.41e-11
Atp1b1	2.85	7.2	5.3	39.53	1.08e-08	1.95e-07
Cxcl13	2.85	7.2	-1	0.5	0.00179726	0.00887627
Cyp3a13	2.83	7.11	0.47	1.38	2.15e-13	8.62e-12
Agr2	2.77	6.83	-0.17	0.89	9.68e-05	0.000730418
Pigr	2.76	6.79	3.26	9.57	1.78e-29	4.25e-27
Reg3b	2.76	6.8	4.68	25.62	9.12e-18	6.58e-16
Scamp5	2.75	6.72	0.47	1.39	3.27e-12	1.06e-10
Mest	2.74	6.67	0.95	1.93	1.13e-14	5.6e-13
Ly6e	2.71	6.52	7.73	212.26	8.9e-41	6.08e-38
Alb	2.7	6.49	1.04	2.06	1.28e-10	3.27e-09
Tmprss2	2.69	6.43	3.02	8.14	3.65e-38	1.87e-35
Kbtbd11	2.69	6.44	-0.26	0.83	1.42e-06	1.78e-05
Ms4a4b	2.68	6.41	-1.26	0.42	0.0072877	0.0281721
Fam188b	2.67	6.36	-1.08	0.47	2.08e-06	2.52e-05
Hpgd	2.64	6.23	1.25	2.38	5.83e-26	1.11e-23
Pmm1	2.64	6.25	0.03	1.02	5.52e-12	1.74e-10
Egr1	2.64	6.23	-0.02	0.99	1.53e-06	1.91e-05
Car11	2.61	6.12	0.43	1.35	5.15e-18	3.8e-16
Clec2d	2.6	6.04	2.73	6.63	8.83e-19	7.36e-17
Snx24	2.6	6.08	-0.55	0.68	4.64e-07	6.51e-06
Tppp3	2.57	5.95	1.63	3.09	2.81e-21	3.39e-19
Iigp1	2.57	5.94	1.28	2.43	0.000331019	0.00211094
Habp2	2.55	5.86	4.36	20.48	7.9e-31	2.31e-28
Olfml3	2.55	5.87	0.58	1.5	5.45e-13	2.01e-11
Scara3	2.54	5.83	3.2	9.17	1.24e-17	8.73e-16
Cyp2s1	2.53	5.78	0.89	1.85	3.66e-21	4.26e-19
Pik3c3	2.53	5.78	3.83	14.25	1.35e-05	0.000131542
Alox12	2.52	5.72	-0.67	0.63	3.06e-07	4.45e-06
Rac2	2.51	5.7	0.28	1.21	6.99e-05	0.000555147
Cd52	2.51	5.7	-0.32	0.8	0.000325864	0.00208195
Akr1d1	2.5	5.67	-0.75	0.59	1.07e-07	1.67e-06
Duox2	2.5	5.64	1.87	3.66	7.64e-07	1.02e-05
Cdca3	2.49	5.62	-0.94	0.52	0.0005697	0.00335727
Glul	2.48	5.58	3.04	8.22	3.83e-15	2.03e-13
Ikzf1	2.45	5.47	-0.61	0.66	0.00436563	0.0184948
Filip1l	2.44	5.44	1.31	2.47	2.8e-21	3.39e-19
Acnat1	2.43	5.38	1.12	2.17	3.89e-15	2.06e-13
Gsta4	2.43	5.39	-0.69	0.62	1.56e-06	1.94e-05
Pamr1	2.42	5.36	2.09	4.27	2.03e-33	6.93e-31
Car2	2.42	5.35	-0.76	0.59	4.45e-05	0.000377909
Mrpl16	2.39	5.23	2.58	5.98	2.98e-35	1.22e-32
Cd59a	2.39	5.23	2.18	4.53	5.21e-13	1.95e-11
Adamtsl2	2.39	5.26	-0.72	0.61	4.94e-07	6.86e-06
Ugt2b34	2.38	5.2	2.77	6.82	3.38e-16	2.03e-14
Ces2g	2.36	5.12	1.08	2.11	7.94e-16	4.55e-14
Akr1c13	2.35	5.1	0.47	1.38	1.62e-13	6.79e-12
Rbbp8nl	2.35	5.11	-0.6	0.66	8.52e-06	8.74e-05
Hcls1	2.35	5.09	-0.41	0.75	2.19e-05	0.000203158
Lrig3	2.33	5.03	-0.89	0.54	2.14e-07	3.19e-06
Mboat1	2.33	5.02	-1.18	0.44	0.000313314	0.00202067
Mecom	2.31	4.96	2.94	7.68	2.75e-26	5.42e-24
Sepp1	2.31	4.94	7.18	145.15	6.56e-25	1.14e-22
Sash3	2.31	4.96	-0.86	0.55	0.0010155	0.00549465
Adra2a	2.3	4.93	-0.42	0.75	2.72e-06	3.17e-05
Cxcr4	2.29	4.89	-1.02	0.49	0.00890845	0.0329462
Agmo	2.26	4.79	0.77	1.71	2.52e-19	2.34e-17
Prom1	2.25	4.76	2.27	4.81	2.52e-31	7.6e-29
Anpep	2.25	4.74	6.42	85.82	3.94e-29	9.17e-27
Itgb7	2.25	4.75	-0.49	0.71	0.00121405	0.00638853
Clu	2.24	4.74	9.06	535.47	3.93e-26	7.6e-24
Igsf23	2.24	4.73	0.95	1.93	8.92e-11	2.34e-09
Tbxas1	2.24	4.74	-0.76	0.59	5.91e-06	6.34e-05
Top2a	2.24	4.73	0.13	1.09	0.00122718	0.00644145
Epsti1	2.23	4.69	-0.75	0.59	0.00483664	0.0200685
1-Sep	2.23	4.68	-0.98	0.51	0.00877489	0.032667
AA986860	2.22	4.65	2.23	4.68	5.03e-30	1.39e-27
Cd24a	2.22	4.67	6.21	74.27	8.25e-24	1.28e-21
Arhgef4	2.22	4.66	0.96	1.94	1.79e-10	4.47e-09
1700017B05Rik	2.22	4.67	0.26	1.2	1.18e-08	2.13e-07
Ehf	2.21	4.64	3.04	8.21	2.02e-26	4.11e-24
H2-Aa	2.21	4.63	3.49	11.2	2.86e-07	4.18e-06
Sox9	2.2	4.61	2.75	6.74	9.15e-29	2.08e-26
Furin	2.2	4.59	5.73	53.03	7.25e-23	1.02e-20
Phyh	2.2	4.59	3.48	11.15	3.59e-16	2.13e-14
Tpm3	2.2	4.59	0.89	1.86	2.66e-12	8.84e-11
Pik3c2g	2.2	4.6	0.66	1.58	1.6e-07	2.44e-06
Ms4a6b	2.19	4.58	-0.74	0.6	0.000402472	0.00250285
Napepld	2.18	4.55	-0.28	0.83	1.09e-06	1.41e-05
Tpk1	2.17	4.49	1.91	3.76	3.96e-19	3.56e-17
Capn6	2.17	4.49	-0.74	0.6	0.000169942	0.00119194
Angptl4	2.16	4.46	-1.15	0.45	0.00862891	0.0323087
Ddx58	2.15	4.44	1.27	2.42	1.92e-23	2.89e-21
Igtp	2.15	4.43	0.37	1.29	0.00012267	0.000902281
Lcp2	2.15	4.43	-1.15	0.45	0.00208468	0.0100299
Satb1	2.15	4.45	-1.23	0.43	0.00900725	0.0332255
Rasal3	2.15	4.43	-0.59	0.66	0.00957409	0.0349413
Col6a6	2.14	4.41	-0.71	0.61	3.71e-05	0.000322226
Nr4a2	2.13	4.36	2.09	4.27	6.03e-22	7.88e-20
Evi2b	2.12	4.33	-1.2	0.44	0.00666859	0.026197
Nicn1	2.11	4.33	0.13	1.09	5.71e-12	1.8e-10
Nckap1l	2.11	4.3	0.14	1.1	2.6e-06	3.07e-05
Sowahb	2.1	4.29	-0.22	0.86	2.1e-08	3.59e-07
Sema3b	2.1	4.29	-0.43	0.74	3.95e-08	6.48e-07
Ptprc	2.1	4.27	1.19	2.28	0.000529671	0.00316321
Fbxo32	2.09	4.27	1.48	2.79	6.02e-23	8.57e-21
Cpq	2.09	4.27	1.48	2.79	3.88e-13	1.48e-11
Coro1a	2.09	4.27	0.93	1.9	0.000325371	0.0020801
Serpina3n	2.09	4.25	0.07	1.05	0.00161685	0.0080945
Il2rg	2.09	4.25	-0.42	0.75	0.0112043	0.0396483
Cfb	2.08	4.22	1.06	2.08	7.8e-08	1.24e-06
Dnahc8	2.08	4.24	-0.88	0.54	0.00231948	0.0109338
Itgb6	2.07	4.2	-0.14	0.9	8.11e-07	1.07e-05
Tmem51	2.06	4.17	0.88	1.84	2.15e-17	1.48e-15
Mia	2.06	4.17	1.67	3.18	4.54e-14	2.06e-12
Col1a1	2.06	4.18	3.54	11.64	2.12e-12	7.18e-11
Tmem27	2.06	4.16	0.85	1.8	2.85e-08	4.77e-07
C4b	2.05	4.14	2.07	4.2	1.36e-08	2.42e-07
Nlrc5	2.05	4.15	0.02	1.02	0.000580399	0.00340855
Cilp	2.04	4.1	1.45	2.73	3.46e-14	1.62e-12
Snx7	2.04	4.1	1.08	2.11	2.05e-10	5.04e-09
Fmo5	2.03	4.1	0.68	1.6	2.26e-09	4.54e-08
Osbpl7	2.03	4.08	0.11	1.08	3e-09	5.87e-08
Ptn	2.03	4.1	-0.83	0.56	7.85e-07	1.04e-05
Ckb	2.03	4.09	0.09	1.07	1.38e-06	1.74e-05
H2-Ab1	2.03	4.1	3.07	8.41	6.47e-06	6.85e-05
Sla	2.03	4.08	-1.06	0.48	0.0128606	0.0442563
Vav1	2.02	4.04	-0.76	0.59	0.000320877	0.00205908
Fermt1	2.01	4.02	1.77	3.42	7.14e-25	1.22e-22
Mki67	2.01	4.03	0.7	1.62	0.00344088	0.0151927
B2m	2	4.01	4.94	30.71	2.89e-08	4.84e-07
Slc19a2	2	4	1.54	2.9	0.000117988	0.000873023
Edn1	2	4	-0.93	0.53	0.000137019	0.000990244
L1cam	2	4.01	-0.96	0.52	0.000525093	0.00313953
Trim35	1.99	3.97	1.71	3.28	2.98e-09	5.86e-08
Cd74	1.98	3.93	4.33	20.15	6.08e-06	6.51e-05
Cdo1	1.97	3.93	2.45	5.45	1.24e-19	1.2e-17
Ambp	1.97	3.91	2.2	4.59	2.71e-12	9e-11
Sfrp5	1.97	3.91	-0.62	0.65	9.02e-05	0.000688088
Cyp4v3	1.96	3.89	2.48	5.6	2.87e-17	1.93e-15
Kansl1l	1.96	3.88	2.27	4.82	1.07e-12	3.79e-11
Amot	1.96	3.89	-0.85	0.55	1.05e-05	0.00010559
C1qtnf6	1.96	3.88	-1.07	0.47	0.000142937	0.00102722
Usp18	1.96	3.89	-0.68	0.63	0.000468536	0.00285977
Pik3cd	1.94	3.84	-0.34	0.79	0.011103	0.039412
Scpep1	1.93	3.8	2.66	6.34	6.5e-12	2.01e-10
Glb1l	1.93	3.8	-0.75	0.59	9.07e-06	9.25e-05
Agt	1.93	3.81	-0.68	0.62	3.66e-05	0.000318546
Bmyc	1.92	3.79	-0.88	0.54	0.00298168	0.0134614
Ciita	1.92	3.78	-0.08	0.94	0.00496357	0.020453
Smc2	1.91	3.77	-0.67	0.63	0.000206796	0.00141468
H2-Eb1	1.91	3.75	2.58	5.99	0.000490532	0.00295879
Micall2	1.91	3.76	-0.87	0.55	0.00108297	0.00578037
Igj	1.91	3.76	0.47	1.38	0.00638342	0.0253359
Ltk	1.9	3.74	0.17	1.13	2.95e-10	7.02e-09
Thy1	1.89	3.7	0.8	1.74	4.93e-10	1.11e-08
Lamc3	1.89	3.7	-0.22	0.86	0.00255338	0.0118285
Vps37c	1.88	3.69	3.02	8.13	6.6e-19	5.64e-17
Mgst1	1.88	3.68	1.33	2.51	2.62e-16	1.59e-14
Adamts15	1.88	3.67	0.39	1.31	2.5e-10	6.05e-09
Ifi47	1.88	3.68	-0.67	0.63	0.00337655	0.0149602
Cd37	1.88	3.68	-0.67	0.63	0.00896288	0.0330758
Lgals3bp	1.87	3.67	3.78	13.71	8.15e-11	2.15e-09
Klf11	1.87	3.67	-0.38	0.77	1.14e-06	1.47e-05
Bhlhb9	1.87	3.66	-0.74	0.6	0.000127544	0.000929637
Ddit4l	1.86	3.63	-0.68	0.63	2.2e-06	2.65e-05
Triqk	1.86	3.64	-0.47	0.72	1.68e-05	0.000160914
Cd209b	1.86	3.62	-0.9	0.53	0.0149666	0.0496047
Phlda3	1.85	3.6	0.4	1.32	1.82e-06	2.23e-05
Ift122	1.84	3.58	0.76	1.69	9.34e-12	2.82e-10
Tox3	1.84	3.59	-1.12	0.46	0.0014998	0.00759758
Klhl13	1.83	3.56	-0.53	0.69	6.66e-06	7.03e-05
Wdr60	1.83	3.55	-0.66	0.63	1.1e-05	0.000109677
Dock11	1.83	3.56	-0.48	0.72	7.62e-05	0.000596058
Abca8b	1.83	3.55	-0.68	0.62	0.000124701	0.000913467
Mcm5	1.83	3.57	-0.27	0.83	0.000270127	0.0017768
Xaf1	1.83	3.56	-0.82	0.57	0.00436515	0.0184948
Itga4	1.83	3.56	-0.61	0.65	0.0132056	0.0450954
Gm2a	1.82	3.53	2.2	4.59	1.61e-13	6.79e-12
Cnn2	1.82	3.53	-0.02	0.99	0.000151084	0.00107746
Fmnl1	1.82	3.54	-0.08	0.95	0.00101672	0.00549832
Trim12c	1.82	3.53	-1.02	0.49	0.00108784	0.0058003
Syt11	1.82	3.52	-0.75	0.59	0.00126141	0.006592
Slc35a3	1.81	3.51	2.96	7.8	4.63e-18	3.46e-16
Ucp2	1.81	3.5	2.55	5.86	1.46e-09	3.08e-08
St6galnac6	1.81	3.5	0.2	1.15	6.86e-09	1.28e-07
Cd14	1.81	3.51	-0.52	0.7	4.37e-06	4.83e-05
Slc16a11	1.8	3.49	-0.7	0.61	9.37e-05	0.000711033
Cdkn1c	1.8	3.49	-0.04	0.97	0.000344683	0.00218583
Cyp1b1	1.8	3.47	-0.42	0.75	0.000482733	0.00292379
Olfm1	1.79	3.47	-0.96	0.52	1.6e-05	0.000153613
Blnk	1.79	3.45	-0.68	0.62	0.000224048	0.00151155
Gmds	1.78	3.43	2.36	5.14	1.31e-18	1.07e-16
Cat	1.78	3.44	4.6	24.27	2.41e-13	9.56e-12
As3mt	1.78	3.44	-0.16	0.89	2.78e-06	3.25e-05
Hopx	1.78	3.44	-0.74	0.6	6.28e-06	6.67e-05
Cldn4	1.78	3.42	-0.19	0.88	3.1e-05	0.000277305
2310001H17Rik	1.78	3.44	-0.78	0.58	0.0014389	0.00735087
Slc44a4	1.77	3.42	1.21	2.31	1.86e-15	1.01e-13
D8Ertd82e	1.77	3.4	1.09	2.12	5.94e-14	2.63e-12
Mpeg1	1.77	3.42	1.11	2.15	2.59e-06	3.06e-05
Pfn2	1.77	3.42	-1	0.5	0.000144302	0.00103539
Plbd1	1.77	3.42	-0.42	0.75	0.00184827	0.00908286
Vil1	1.77	3.42	-1.2	0.44	0.00711068	0.0276128
1700110K17Rik	1.76	3.38	1.12	2.17	1.63e-08	2.86e-07
Postn	1.76	3.39	0.31	1.24	2.08e-07	3.11e-06
Arhgap4	1.76	3.39	-0.13	0.91	0.00153949	0.00776413
Selplg	1.76	3.39	-0.23	0.86	0.00520411	0.0212901
Col1a2	1.75	3.36	3.97	15.71	2.94e-10	7e-09
1110051M20Rik	1.75	3.37	-0.36	0.78	1.71e-05	0.00016281
Icosl	1.75	3.36	-0.14	0.9	6.45e-05	0.00051641
Slc39a10	1.74	3.34	-0.08	0.94	1.64e-07	2.5e-06
Myo1f	1.74	3.34	-0.64	0.64	0.000467439	0.00285478
Smim3	1.73	3.31	2.48	5.57	4.85e-20	4.93e-18
Ifi27l2a	1.73	3.32	0.57	1.49	8.72e-05	0.000669265
Pllp	1.72	3.29	0.22	1.17	1.41e-06	1.77e-05
Adcy7	1.71	3.27	0.65	1.57	1.85e-06	2.27e-05
Itpripl1	1.71	3.28	-0.91	0.53	0.00136023	0.00700131
Ttll7	1.7	3.24	0.67	1.59	1.9e-09	3.89e-08
Itpr2	1.69	3.23	4.05	16.55	2.68e-18	2.06e-16
Pisd-ps2	1.69	3.22	1.79	3.45	3.26e-14	1.54e-12
Rgs2	1.69	3.23	0.88	1.85	1.93e-10	4.81e-09
Tmem45a	1.69	3.22	0.96	1.95	2.35e-10	5.73e-09
Jun	1.69	3.23	2.5	5.64	3.7e-09	7.14e-08
Vgll4	1.69	3.23	0.31	1.24	3.1e-08	5.17e-07
Ccng2	1.69	3.23	-0.02	0.99	1.21e-05	0.00011895
Gabbr1	1.68	3.21	1.15	2.21	4.93e-13	1.86e-11
Capg	1.68	3.19	0.26	1.19	3.62e-08	5.97e-07
Sfrp1	1.68	3.21	0.37	1.29	3.27e-06	3.73e-05
Ccl9	1.68	3.2	-0.43	0.74	0.000170044	0.00119194
Oas2	1.68	3.21	-0.25	0.84	0.00135597	0.00698641
Irf8	1.68	3.21	-0.29	0.82	0.00247041	0.0115391
Wdfy4	1.68	3.21	-0.26	0.84	0.00714885	0.02774
8430419L09Rik	1.67	3.19	4.32	20	9.06e-17	5.84e-15
Ncf1	1.67	3.18	-0.73	0.6	0.00173183	0.00858628
2410017I17Rik	1.67	3.18	-0.98	0.51	0.00620807	0.0247453
Rcsd1	1.67	3.18	-0.79	0.58	0.00834186	0.0314639
Serpina10	1.66	3.15	1.9	3.72	2.32e-09	4.66e-08
Rassf4	1.66	3.15	0.66	1.58	2.65e-07	3.91e-06
Reg3a	1.66	3.16	1.94	3.83	2.62e-06	3.08e-05
Pafah1b3	1.66	3.16	-0.31	0.8	2.65e-05	0.000241374
Laptm5	1.66	3.17	1.23	2.34	5.87e-05	0.000479291
Tiam1	1.66	3.16	-0.58	0.67	0.000258607	0.00171313
Plch2	1.66	3.15	-0.77	0.59	0.00621653	0.0247694
Fblim1	1.65	3.13	0.35	1.27	3.04e-09	5.92e-08
Cyp4f16	1.65	3.14	-0.85	0.55	0.000186398	0.00129155
Dtx3	1.64	3.12	2.16	4.46	1.45e-18	1.18e-16
Pik3r1	1.64	3.12	4.58	23.86	1.68e-13	7e-12
Itih2	1.64	3.11	3.19	9.12	2.49e-12	8.4e-11
Slc25a20	1.64	3.12	-0.03	0.98	1.55e-05	0.000149422
Tmem176a	1.63	3.09	1.68	3.2	7.65e-11	2.02e-09
C3ar1	1.63	3.09	-1.04	0.48	0.000566599	0.00334091
Ly6d	1.63	3.09	-0.58	0.67	0.00111062	0.00590637
Glis3	1.63	3.09	-0.89	0.54	0.001559	0.0078432
Chd3	1.62	3.08	2.49	5.61	9.6e-14	4.15e-12
Ctsh	1.62	3.08	1.39	2.63	2.86e-13	1.12e-11
Cutc	1.62	3.06	0.64	1.56	5.5e-06	5.93e-05
Ms4a6c	1.62	3.08	-0.77	0.59	0.0014829	0.00752688
B4galt4	1.61	3.04	4.48	22.33	4.55e-11	1.23e-09
Igf1r	1.61	3.05	3.35	10.18	6.47e-11	1.72e-09
Igsf10	1.61	3.06	-0.25	0.84	4.57e-06	5.04e-05
Zfp872	1.61	3.06	-0.84	0.56	0.00128526	0.00668598
Arhgdib	1.61	3.05	0.31	1.24	0.0014194	0.00726209
H2-Ea-ps	1.61	3.06	2.16	4.46	0.0023295	0.0109709
Hmha1	1.61	3.05	1.09	2.13	0.00440526	0.018636
Fam65b	1.61	3.06	-1.08	0.47	0.0141681	0.0475893
Ephx1	1.6	3.03	2.54	5.83	8.72e-19	7.33e-17
BC021891	1.6	3.03	1.97	3.91	4.18e-18	3.17e-16
Kcnq1	1.6	3.03	4.16	17.87	1.12e-11	3.31e-10
Cystm1	1.6	3.02	2.83	7.12	5.63e-10	1.26e-08
Lsp1	1.6	3.04	0.95	1.93	8.16e-07	1.08e-05
Slc2a5	1.6	3.03	-0.1	0.94	7.47e-06	7.83e-05
Papss2	1.6	3.04	0.74	1.67	0.00186368	0.00914265
Dock10	1.6	3.03	-0.51	0.7	0.0145886	0.0487234
Cyba	1.59	3	1.02	2.03	2.35e-11	6.65e-10
Pcsk5	1.59	3.02	-0.94	0.52	0.000101801	0.000764698
Morn2	1.59	3.02	-0.43	0.74	0.000289022	0.00188656
Tle4	1.58	2.98	1.13	2.19	5.67e-11	1.51e-09
Akr1c14	1.58	2.98	0.32	1.25	3.06e-06	3.53e-05
Mtmr11	1.58	2.99	-0.66	0.63	0.000212352	0.00144597
H2-K1	1.57	2.96	4.07	16.84	7.01e-07	9.43e-06
Morf4l1	1.57	2.96	-1.02	0.49	0.000235024	0.00157317
Dtx4	1.56	2.95	2.84	7.14	6.35e-14	2.79e-12
Pls3	1.56	2.95	1.43	2.7	2.02e-10	4.98e-09
Pam	1.56	2.96	3.46	11.01	6.13e-07	8.38e-06
Rtp4	1.56	2.95	-0.92	0.53	0.00253363	0.01177
Itgal	1.56	2.94	-0.01	0.99	0.00709362	0.027557
Psmb8	1.55	2.92	0.52	1.43	0.00102938	0.00556042
Dbi	1.54	2.9	3.28	9.73	3.25e-09	6.31e-08
Ncapd2	1.54	2.92	-0.2	0.87	0.00282295	0.0128633
Ahcyl2	1.53	2.89	4.07	16.8	2.77e-14	1.32e-12
Pik3c2a	1.53	2.89	3.41	10.6	4.53e-14	2.06e-12
Pafah2	1.53	2.9	0.8	1.74	1.02e-10	2.68e-09
Ptgr1	1.53	2.89	0.34	1.26	8.55e-09	1.58e-07
Zfp467	1.53	2.88	0.09	1.07	3.2e-07	4.65e-06
Samd9l	1.53	2.89	0.66	1.57	5.08e-05	0.00042396
Cnpy4	1.53	2.89	-0.65	0.64	6.72e-05	0.000536187
Dock2	1.53	2.9	0.04	1.03	0.00901103	0.0332255
Chp1	1.52	2.87	4.02	16.19	2.56e-14	1.23e-12
Lrig1	1.52	2.86	3.32	10	3.07e-13	1.2e-11
Glb1l2	1.52	2.86	0.87	1.83	8.31e-06	8.56e-05
Itgam	1.52	2.87	-0.04	0.97	0.000302199	0.00195885
Tlr3	1.52	2.86	-0.8	0.57	0.000318248	0.00204605
Enc1	1.51	2.84	1.95	3.85	1.19e-16	7.54e-15
Snx10	1.51	2.86	1.19	2.28	2.04e-09	4.14e-08
Mafb	1.51	2.85	-0.07	0.95	8.46e-07	1.11e-05
Frmd4b	1.5	2.83	1.17	2.25	1.65e-12	5.7e-11
Cdk19	1.5	2.84	0.94	1.92	4.87e-10	1.1e-08
Dnaaf3	1.5	2.83	-0.6	0.66	0.000122734	0.000902281
Lum	1.49	2.81	2.06	4.16	2.7e-17	1.84e-15
Tnfrsf1b	1.49	2.8	-0.17	0.89	0.00284894	0.0129644
Apobec1	1.49	2.82	-1.15	0.45	0.00389795	0.0168407
Vcam1	1.49	2.81	-0.36	0.78	0.00803073	0.0304698
Rnpc3	1.48	2.79	2.05	4.15	3.74e-17	2.49e-15
Psme1	1.48	2.79	1.06	2.08	4.04e-10	9.32e-09
Matn2	1.48	2.78	0.81	1.75	1.1e-06	1.42e-05
1500011B03Rik	1.48	2.79	-0.24	0.85	7.16e-06	7.54e-05
Klhdc8b	1.48	2.79	0.01	1.01	7.27e-06	7.64e-05
Lrrn4	1.48	2.78	-0.91	0.53	0.00381274	0.0165423
Ccr2	1.48	2.79	-0.32	0.8	0.0118549	0.0414778
Ghr	1.47	2.78	5.24	37.9	2.02e-14	9.86e-13
Tnip1	1.47	2.78	0.89	1.86	2.08e-09	4.22e-08
Dnajc22	1.47	2.76	0.66	1.58	1.01e-08	1.86e-07
Pdzk1ip1	1.47	2.76	0.57	1.48	1.72e-08	3e-07
Pls1	1.47	2.77	0.33	1.26	6.59e-08	1.06e-06
Lyz2	1.47	2.76	3.47	11.08	3.95e-07	5.63e-06
Cd200	1.47	2.77	0.55	1.47	5.99e-06	6.42e-05
C1qb	1.47	2.77	1.79	3.47	6.15e-06	6.56e-05
Cpxm1	1.47	2.78	-0.23	0.85	0.000104327	0.000780964
Slc4a4	1.47	2.78	-1.16	0.45	0.00928273	0.0340966
Lamb3	1.46	2.75	3.61	12.22	1.72e-13	7.14e-12
Zak/B230120H23Rik	1.46	2.76	0.47	1.39	1.32e-06	1.68e-05
Pigh	1.46	2.74	-0.15	0.9	1.21e-05	0.00011895
Tmem79	1.46	2.76	-0.36	0.78	3.74e-05	0.000324001
Col16a1	1.45	2.73	0.24	1.18	3.73e-06	4.19e-05
Steap4	1.45	2.73	0.79	1.72	1.06e-05	0.000106912
Siglec1	1.45	2.72	0.83	1.78	0.000336088	0.00213397
Mcm3	1.45	2.74	-0.49	0.71	0.000761922	0.00431629
Irf5	1.45	2.73	-0.87	0.55	0.00220369	0.0104747
Pcolce	1.44	2.71	1.74	3.34	9.66e-08	1.52e-06
Emr1	1.44	2.71	0.62	1.54	4.03e-06	4.5e-05
Klf5	1.44	2.71	-0.29	0.82	0.000101855	0.000764698
Gli1	1.44	2.72	-0.52	0.7	0.000182955	0.00126942
Ctss	1.44	2.71	1.49	2.81	0.00050963	0.00306136
Tctn1	1.44	2.71	-0.96	0.51	0.00169166	0.00841154
Ccdc77	1.44	2.71	-1.1	0.47	0.00294017	0.0133101
Errfi1	1.43	2.7	2.52	5.72	4.33e-12	1.38e-10
Blvrb	1.43	2.7	0.58	1.49	2.78e-09	5.48e-08
Exph5	1.43	2.7	0.9	1.86	5.89e-08	9.48e-07
B3galtl	1.43	2.7	0.26	1.19	2.1e-07	3.13e-06
Col3a1	1.43	2.7	4.95	30.87	5.33e-07	7.35e-06
Me3	1.43	2.69	0.56	1.47	6.48e-07	8.84e-06
Pik3ip1	1.43	2.7	-0.61	0.66	0.000670829	0.00386
Rgs10	1.43	2.7	-1.1	0.47	0.00372327	0.016209
Scd1	1.43	2.7	4.83	28.42	0.00460543	0.0193191
Plac8	1.43	2.7	-0.77	0.58	0.00658999	0.0259348
Tcf19	1.43	2.7	-0.94	0.52	0.00816262	0.030913
Rasgrp2	1.43	2.7	-0.87	0.55	0.00839236	0.0316195
Itm2b	1.42	2.67	5.82	56.42	6.82e-13	2.48e-11
Sult1c2	1.42	2.68	3.04	8.25	5.96e-09	1.13e-07
Plin2	1.42	2.68	0.41	1.32	3.67e-06	4.15e-05
Bmf	1.42	2.68	0.41	1.33	7.69e-06	8.01e-05
Ccdc120	1.41	2.66	0.13	1.09	2.07e-06	2.51e-05
Antxr1	1.41	2.65	0.31	1.24	2.52e-06	2.99e-05
Ctso	1.41	2.66	0.03	1.02	1.14e-05	0.000112624
Parp3	1.41	2.65	0.06	1.05	4.1e-05	0.000351363
Cotl1	1.41	2.65	0.84	1.8	0.000265336	0.00174978
Tmprss4	1.41	2.66	-0.32	0.8	0.00071822	0.00409589
Wipf1	1.41	2.66	-0.1	0.93	0.00131004	0.00679418
Slc15a2	1.41	2.66	0.77	1.7	0.00133104	0.00687527
Gstm5	1.4	2.64	2	4	3.68e-12	1.18e-10
Wwp1	1.4	2.63	2.69	6.46	7.71e-12	2.36e-10
Mcm6	1.4	2.64	0.58	1.5	3.52e-06	3.99e-05
Stat1	1.4	2.63	1.79	3.46	2.57e-05	0.00023441
Cd55	1.4	2.63	-0.32	0.8	0.000825298	0.00461264
Dusp6	1.39	2.62	0.4	1.32	1.58e-06	1.96e-05
Ccdc162	1.39	2.62	-0.39	0.76	0.000107433	0.000803043
Wbscr27	1.39	2.62	-0.68	0.62	0.000510564	0.00306518
Trim30a	1.39	2.62	-0.41	0.75	0.00350123	0.0153994
Dock8	1.39	2.63	-0.12	0.92	0.00728497	0.0281721
Col14a1	1.38	2.6	2.29	4.89	8.7e-15	4.42e-13
Trim24	1.38	2.61	3.39	10.49	2.29e-13	9.13e-12
Ptprs	1.38	2.61	1.35	2.55	1.62e-09	3.37e-08
Cfh	1.38	2.6	0.84	1.79	5.52e-09	1.05e-07
Galnt4	1.38	2.61	1.34	2.53	2.42e-08	4.09e-07
Col5a1	1.38	2.59	1.72	3.3	2.28e-06	2.73e-05
Rassf2	1.38	2.6	0.38	1.3	0.00106956	0.00572858
Pqlc3	1.38	2.6	-1.06	0.48	0.00142368	0.00728039
Unc93b1	1.37	2.59	1.42	2.67	2.28e-07	3.39e-06
Cxcl14	1.37	2.58	0.48	1.39	4.5e-07	6.32e-06
Prkab2	1.37	2.59	0.12	1.09	6.13e-05	0.0004974
Gnb5	1.37	2.58	-0.7	0.62	0.000315799	0.00203286
Synm	1.37	2.58	-0.42	0.75	0.00334585	0.0148439
Tapbp	1.36	2.56	2.82	7.04	6.74e-08	1.08e-06
C1qc	1.36	2.57	1.62	3.08	6.18e-06	6.58e-05
Cdc14b	1.36	2.57	-0.41	0.75	7.34e-05	0.000578181
Csf2ra	1.36	2.56	-0.23	0.85	0.000692938	0.00397605
Fcgr2b	1.36	2.57	-0.62	0.65	0.00147014	0.00747323
Vill	1.35	2.55	2.21	4.62	5.08e-14	2.28e-12
Epcam	1.35	2.55	2.91	7.53	4.96e-13	1.86e-11
Anxa4	1.35	2.54	3.48	11.18	1.57e-11	4.49e-10
Syt7	1.35	2.55	1.1	2.14	3.92e-07	5.6e-06
Neurl3	1.35	2.56	-0.04	0.97	0.000472132	0.00287427
BC030307	1.35	2.54	-1.08	0.47	0.00277657	0.0127028
Gbp7	1.35	2.55	-0.12	0.92	0.00431938	0.0183216
Adrbk2	1.35	2.56	0.13	1.09	0.00522729	0.0213594
Col11a2	1.35	2.54	-0.99	0.5	0.00655872	0.0258717
Nedd9	1.34	2.53	1.38	2.6	1.25e-06	1.6e-05
C2	1.34	2.54	0.47	1.38	2.16e-06	2.6e-05
Tmem194	1.34	2.54	0.03	1.02	5.18e-06	5.63e-05
Wdr72	1.34	2.53	0.11	1.08	4.56e-05	0.000384696
Abcc5	1.34	2.53	0.24	1.18	8.42e-05	0.000649463
Ccl6	1.34	2.53	0.49	1.41	0.000164919	0.00116318
Cacnb3	1.34	2.53	-0.29	0.82	0.00761391	0.0291909
Srpx	1.34	2.53	-0.38	0.77	0.0129268	0.0444245
Wee1	1.33	2.51	1.64	3.12	1.85e-11	5.27e-10
Gde1	1.33	2.52	3.28	9.69	4.42e-11	1.21e-09
Itm2a	1.33	2.52	0	1	1.29e-05	0.000125734
Pld4	1.33	2.51	0.31	1.24	0.000334398	0.00212587
Zfp788	1.33	2.52	-0.23	0.85	0.000387006	0.00242868
Btbd3	1.32	2.5	3.44	10.84	1.07e-08	1.95e-07
Map7d1	1.32	2.5	1.21	2.31	1.33e-08	2.38e-07
Eml1	1.32	2.49	0.29	1.23	6.7e-07	9.05e-06
Il33	1.32	2.49	-0.81	0.57	0.000706489	0.00404842
Cybb	1.32	2.49	0.04	1.02	0.00125975	0.00658671
Cdh11	1.32	2.49	-0.66	0.63	0.00271109	0.0124421
Hvcn1	1.32	2.49	-0.51	0.7	0.00902579	0.0332601
Nfkbiz	1.31	2.49	2.02	4.04	3.82e-14	1.78e-12
Plekha6	1.31	2.48	2.32	5	7.3e-10	1.59e-08
Arhgef3	1.31	2.48	0.49	1.4	0.00016459	0.00116245
Efemp2	1.31	2.47	-0.36	0.78	0.000292697	0.00190438
Vcan	1.31	2.47	-0.52	0.7	0.00106833	0.00572858
Lsm3	1.31	2.47	-0.47	0.72	0.00106903	0.00572858
6-Sep	1.31	2.48	-0.42	0.75	0.00368424	0.0160664
Plce1	1.31	2.47	-0.49	0.71	0.00405741	0.0173976
Zdhhc2	1.31	2.47	-0.75	0.59	0.00933482	0.0342756
S100a11	1.31	2.48	-0.61	0.66	0.01024	0.0369764
Sfi1	1.3	2.46	1.97	3.91	2.72e-13	1.07e-11
Casz1	1.3	2.46	1.2	2.3	4.63e-10	1.06e-08
Tagln2	1.3	2.47	3.2	9.17	1.68e-09	3.49e-08
Nipsnap1	1.3	2.46	0.75	1.69	1.94e-08	3.34e-07
Rab34	1.3	2.46	0.46	1.38	4.87e-07	6.79e-06
Ccdc68	1.3	2.46	0.92	1.89	1.36e-06	1.72e-05
Pros1	1.3	2.47	0.55	1.46	1.89e-06	2.31e-05
Ifih1	1.3	2.46	0.19	1.14	2.25e-05	0.000207258
Ten1	1.3	2.46	-0.23	0.85	7e-05	0.000555668
Col5a2	1.3	2.47	1.62	3.08	9.56e-05	0.000723433
Plcg2	1.3	2.46	-0.45	0.73	0.00298441	0.0134673
Lgals3	1.3	2.46	-0.64	0.64	0.00462751	0.0193958
Pdlim2	1.3	2.46	-1.14	0.45	0.0148571	0.0493696
Prss23	1.29	2.44	3.39	10.51	3.82e-10	8.83e-09
Por	1.29	2.44	2.46	5.52	1.64e-09	3.42e-08
Itpkb	1.29	2.44	1.77	3.42	4.43e-08	7.21e-07
Pla2g1b	1.29	2.44	9.41	679.3	6.64e-07	8.99e-06
Dync2li1	1.29	2.45	0.08	1.06	3.63e-05	0.000315995
H2-Q4	1.29	2.44	2.18	4.54	4.1e-05	0.000351363
Gfpt2	1.29	2.44	-0.2	0.87	8.49e-05	0.00065284
Vcp	1.29	2.44	1.82	3.52	0.000153148	0.00109066
Naaa	1.29	2.44	-0.02	0.99	0.000385831	0.00242428
Gbp2	1.29	2.44	0.51	1.42	0.00064136	0.00371696
Mical1	1.29	2.45	-0.53	0.69	0.00223671	0.0105923
Penk	1.29	2.44	0.99	1.99	0.0023801	0.0111887
Slc44a3	1.28	2.44	3.06	8.34	1.75e-09	3.6e-08
Vim	1.28	2.42	3.08	8.45	1.29e-08	2.32e-07
Slc35g1	1.28	2.43	3.21	9.27	1.03e-07	1.62e-06
Arsk	1.28	2.42	0.01	1.01	4.85e-06	5.32e-05
Apaf1	1.28	2.43	-0.28	0.82	0.000204763	0.0014055
Zscan2	1.28	2.43	-0.5	0.71	0.00038738	0.00242954
Tmem229b	1.28	2.44	-0.34	0.79	0.00325049	0.0145083
Flt3l	1.28	2.44	-0.81	0.57	0.00337194	0.0149527
Stk36	1.28	2.42	-1.13	0.46	0.0149581	0.0496026
Shroom1	1.27	2.41	2.2	4.58	2.81e-12	9.29e-11
Myrf	1.27	2.41	4.63	24.69	1.05e-11	3.11e-10
Adck5	1.27	2.41	1.73	3.32	2.09e-11	5.92e-10
Acadl	1.27	2.42	1.91	3.76	1.11e-10	2.87e-09
Nedd4l	1.27	2.41	1.5	2.82	3.35e-10	7.83e-09
Stab1	1.27	2.41	2.02	4.06	2.03e-09	4.12e-08
Phldb2	1.27	2.42	0.47	1.39	1.76e-06	2.17e-05
Shisa5	1.27	2.41	2.82	7.07	2.81e-06	3.27e-05
Pltp	1.27	2.41	1.27	2.42	5.83e-06	6.26e-05
Abca9	1.27	2.42	0.1	1.07	8.22e-06	8.49e-05
Slc22a18	1.27	2.4	0.66	1.58	1.67e-05	0.000159907
Sox4	1.27	2.41	1.26	2.39	1.91e-05	0.000180812
Galm	1.27	2.42	0.23	1.18	3.67e-05	0.000318567
Bbs1	1.27	2.4	0.04	1.03	6.15e-05	0.000498841
Fzd1	1.27	2.41	-0.19	0.87	0.000774901	0.0043729
Phlda1	1.27	2.42	-0.39	0.76	0.0013197	0.006827
1700040L02Rik	1.27	2.41	-0.99	0.5	0.00759654	0.0291461
Tmem173	1.27	2.42	-0.47	0.72	0.011587	0.0407355
Lipo1	1.27	2.41	-0.92	0.53	0.0125801	0.0435102
Grb7	1.26	2.39	1.83	3.55	1.16e-11	3.41e-10
Gale	1.26	2.4	1.6	3.02	3.07e-11	8.56e-10
Cib1	1.26	2.4	1.69	3.22	1.5e-10	3.8e-09
Akr1c12	1.26	2.39	1.34	2.54	1.2e-08	2.17e-07
Trp53inp1	1.26	2.39	3.45	10.93	7.29e-08	1.16e-06
Sord	1.26	2.39	3.62	12.27	2.82e-07	4.14e-06
Endod1	1.26	2.39	0.88	1.84	7.86e-06	8.17e-05
Arg2	1.26	2.39	0.06	1.04	2.51e-05	0.000229986
Prcp	1.26	2.4	0.34	1.27	2.66e-05	0.00024201
Col6a2	1.26	2.39	2.94	7.67	4.56e-05	0.000384696
Ephb3	1.26	2.4	-0.15	0.9	9.92e-05	0.000747636
Lama2	1.26	2.39	1.23	2.35	0.000656559	0.00379066
Lepr	1.26	2.4	-0.59	0.67	0.0024955	0.0116298
Acta2	1.25	2.38	0.9	1.87	0.000653505	0.00377527
Tor3a	1.25	2.37	0.07	1.05	0.000976845	0.0053079
Akr1b10	1.25	2.37	-0.46	0.72	0.003238	0.0144588
Tap1	1.25	2.38	0.6	1.51	0.00524368	0.0214093
Lmcd1	1.25	2.37	-0.22	0.86	0.00972751	0.0354286
Fosl2	1.24	2.36	1.13	2.19	2.34e-06	2.79e-05
Zc3hav1	1.24	2.36	0.5	1.41	2.22e-05	0.00020543
Srxn1	1.24	2.35	0.21	1.16	3.32e-05	0.000292695
Smc4	1.24	2.36	0.68	1.6	7.46e-05	0.000586183
Crem	1.24	2.36	-0.09	0.94	0.000399402	0.00249274
Ecm1	1.24	2.37	0.9	1.86	0.00161437	0.00808605
Fbxo44	1.24	2.37	-1.03	0.49	0.00736375	0.0284157
Rps6ka1	1.23	2.35	1.8	3.48	9.7e-12	2.92e-10
Far1	1.23	2.34	0.86	1.82	1.14e-05	0.000113098
Wdr35	1.23	2.35	0.15	1.11	1.67e-05	0.000159684
Paqr4	1.23	2.34	0.14	1.1	2.01e-05	0.000188218
Peg3	1.23	2.34	2.02	4.05	0.000165332	0.00116448
Jak3	1.23	2.34	0.55	1.47	0.000231743	0.00155527
Cbr2	1.23	2.34	0.12	1.08	0.00033212	0.00211665
Trim2	1.22	2.33	1.48	2.79	3.77e-10	8.77e-09
F13a1	1.22	2.33	1.42	2.68	1.3e-08	2.33e-07
Mmp2	1.22	2.33	1.68	3.2	6.68e-08	1.07e-06
Serpinf1	1.22	2.32	0.88	1.84	7.06e-06	7.44e-05
C1qa	1.22	2.32	1.97	3.92	1e-05	0.000101488
H2-T23	1.22	2.33	1.7	3.25	9.64e-05	0.000727944
Cxcl16	1.22	2.33	-0.03	0.98	0.000298587	0.0019402
Elf4	1.22	2.33	-0.27	0.83	0.00344423	0.0152009
Fam115a	1.22	2.33	-0.81	0.57	0.00586437	0.0236141
Fermt3	1.22	2.33	-0.15	0.9	0.00781452	0.0298372
Marcksl1	1.22	2.32	-0.85	0.55	0.0104098	0.0374839
Sh3kbp1	1.22	2.32	-0.63	0.65	0.0106364	0.0381792
Fbln5	1.21	2.32	0.66	1.58	2.97e-06	3.45e-05
Trf	1.21	2.31	2.24	4.74	7.72e-06	8.03e-05
Map3k12	1.21	2.31	0.51	1.42	1.88e-05	0.00017799
Fam46a	1.21	2.32	0.7	1.62	0.000798358	0.00448797
Elovl7	1.21	2.31	-0.46	0.73	0.00170037	0.0084466
Slpi	1.21	2.32	-0.37	0.77	0.00318512	0.01426
Lrch1	1.2	2.3	0.94	1.92	1.25e-07	1.93e-06
Fn1	1.2	2.3	3.26	9.55	0.000227762	0.00153157
Cd209f	1.2	2.3	-0.13	0.91	0.000413958	0.00255865
Apobec3	1.2	2.3	-0.86	0.55	0.00172234	0.00854745
Pid1	1.2	2.3	-0.52	0.7	0.00657463	0.0258942
Adam19	1.2	2.3	-0.47	0.72	0.0115127	0.0405193
9030617O03Rik	1.19	2.29	1.39	2.62	4.32e-10	9.92e-09
Stx3	1.19	2.29	1.73	3.32	2.98e-09	5.86e-08
Brms1	1.19	2.28	1.02	2.02	7.68e-09	1.43e-07
Erbb2	1.19	2.28	0.84	1.8	4.13e-07	5.85e-06
Parp10	1.19	2.27	0.48	1.39	0.000111759	0.000831137
Fuz	1.19	2.28	0.08	1.06	0.000410649	0.00254126
Adamts2	1.19	2.28	0.03	1.02	0.00060394	0.00351858
Mcm4	1.19	2.29	-0.41	0.75	0.00135075	0.00696653
C2cd4b	1.19	2.28	-0.07	0.95	0.00193508	0.00944317
H2-Q10	1.19	2.29	0.83	1.78	0.00283434	0.0129037
Fcer1g	1.19	2.28	-0.3	0.81	0.00798539	0.0303313
Pts	1.19	2.28	-0.05	0.96	0.00885448	0.0328295
Rgs12	1.19	2.29	-1.12	0.46	0.0108269	0.0387004
Plekhb2	1.18	2.27	1.54	2.91	3.15e-10	7.41e-09
Nlgn2	1.18	2.27	0.82	1.77	5.81e-07	7.99e-06
Thbs3	1.18	2.26	0.04	1.03	0.000148586	0.0010626
Neat1	1.18	2.27	6.63	98.71	0.000407776	0.00252654
Gm8909	1.18	2.26	0.61	1.53	0.0011643	0.00616309
Rab13	1.18	2.26	-0.92	0.53	0.0026661	0.0122631
Cd68	1.18	2.27	-0.36	0.78	0.00292746	0.0132687
Olfml2b	1.18	2.26	-0.49	0.71	0.00391273	0.0168832
Fcrls	1.18	2.27	-0.62	0.65	0.00500115	0.0205748
Elf3	1.17	2.26	1.21	2.32	3.32e-07	4.81e-06
Zeb2	1.17	2.25	0.12	1.09	0.00091313	0.00501756
Gpr30	1.16	2.24	2.38	5.2	3.79e-08	6.23e-07
Srr	1.16	2.23	0.65	1.57	3.12e-05	0.000277596
Hexb	1.16	2.23	0.67	1.59	4.56e-05	0.000384696
Sparc	1.16	2.24	3.81	14.03	6.03e-05	0.000490734
C3	1.16	2.23	4.75	26.96	6.21e-05	0.000501894
Slc4a3	1.16	2.24	-0.15	0.9	0.000249153	0.001658
Ccdc80	1.16	2.23	1.37	2.59	0.000401929	0.00250273
Mr1	1.16	2.23	-0.73	0.6	0.00187939	0.00921531
Armcx2	1.16	2.24	0.08	1.06	0.00286807	0.0130341
Pnck	1.16	2.23	-0.74	0.6	0.00444784	0.0187655
Zfp157	1.16	2.23	-0.54	0.69	0.00552652	0.0224389
Phyhd1	1.16	2.23	-0.6	0.66	0.00766201	0.0293205
Atf3	1.16	2.23	-0.67	0.63	0.00775515	0.0296216
Praf2	1.16	2.24	-0.83	0.56	0.00952812	0.034786
Ech1	1.15	2.22	2.58	5.99	2.03e-12	6.94e-11
Mgp	1.15	2.22	2.1	4.28	1.03e-08	1.88e-07
Prdx1	1.15	2.22	3.07	8.41	1.56e-08	2.74e-07
Sh3bgrl3	1.15	2.22	2.01	4.02	1.77e-07	2.68e-06
Mmp14	1.15	2.22	0.86	1.81	2.65e-06	3.12e-05
Cfp	1.15	2.23	0.63	1.55	0.000240814	0.00160668
Pvrl4	1.15	2.22	-0.14	0.91	0.000682313	0.00391948
Paqr5	1.15	2.22	0	1	0.00145043	0.00739133
Fancg	1.15	2.22	-0.72	0.61	0.00699249	0.0272572
Nsmf	1.14	2.21	1.96	3.9	6.48e-12	2.01e-10
Cpeb2	1.14	2.21	2.59	6.01	1.23e-11	3.58e-10
Man2b1	1.14	2.21	3.45	10.95	4.82e-10	1.1e-08
Sorbs2	1.14	2.21	2.8	6.94	1.69e-07	2.57e-06
Tnfrsf21	1.14	2.21	2.06	4.18	4.76e-07	6.65e-06
Col6a1	1.14	2.2	3.02	8.14	2.55e-05	0.000233515
Plekha2	1.14	2.21	0.63	1.55	7.55e-05	0.000591668
Scnm1	1.14	2.2	0.05	1.04	0.00018858	0.00130491
Brms1l	1.14	2.2	0.19	1.14	0.000802161	0.00450688
Lig1	1.14	2.21	-0.51	0.7	0.0026262	0.0121067
Etv5	1.14	2.2	-0.91	0.53	0.012857	0.0442563
Hsd17b11	1.13	2.18	1.3	2.46	2.64e-08	4.46e-07
Sgms2	1.13	2.19	3.86	14.52	2.83e-07	4.14e-06
Folr2	1.13	2.18	-0.02	0.99	0.000117301	0.000869196
Phactr2	1.13	2.18	-0.04	0.97	0.000150827	0.00107638
Zfp36	1.13	2.18	0.77	1.7	0.000490158	0.00295879
Irgm1	1.13	2.19	1.12	2.18	0.0012712	0.00663301
Galns	1.13	2.19	-1.09	0.47	0.0082124	0.0310623
Gas2	1.13	2.19	-1.04	0.49	0.00843317	0.0317184
Ephx2	1.13	2.18	-0.4	0.76	0.00908071	0.0334384
Tnrc6a	1.12	2.18	3.29	9.77	1.48e-08	2.61e-07
Gas7	1.12	2.17	0.51	1.43	8.04e-06	8.34e-05
A530054K11Rik	1.12	2.17	0.04	1.03	0.000351786	0.00222537
Nudt4	1.12	2.18	4.37	20.75	0.000902255	0.00497381
Ccdc66	1.12	2.17	-0.49	0.71	0.00144153	0.00735328
Dtx3l	1.12	2.17	-0.07	0.95	0.00145433	0.00740755
Tyrobp	1.12	2.17	-0.07	0.95	0.00194762	0.00948631
Il4ra	1.12	2.18	0.18	1.13	0.00224441	0.010619
Arhgef19	1.12	2.17	0.54	1.45	0.00243111	0.0113918
0610040J01Rik	1.11	2.16	2.07	4.19	1.96e-10	4.85e-09
Cd81	1.11	2.16	3.56	11.81	1.57e-09	3.3e-08
Myadm	1.11	2.15	2.38	5.22	1.57e-09	3.3e-08
Ctc1	1.11	2.16	0.68	1.6	9.04e-06	9.22e-05
Ccdc90b	1.11	2.16	-0.03	0.98	0.000145963	0.00104604
Tap2	1.11	2.17	1.25	2.37	0.000283471	0.00185387
Nipsnap3b	1.11	2.16	-0.17	0.89	0.000448491	0.00275053
Fam102b	1.11	2.15	-0.1	0.93	0.000541072	0.00322093
Cxxc4	1.11	2.17	0.31	1.24	0.00137886	0.00708298
Bcl2l11	1.11	2.15	-0.13	0.92	0.00314436	0.0141152
Numbl	1.11	2.16	-1.01	0.5	0.00893247	0.0330231
Pik3r3	1.11	2.16	-0.67	0.63	0.0126088	0.043582
Cygb	1.1	2.15	1.47	2.76	7.12e-07	9.57e-06
Zfyve16	1.1	2.15	0.7	1.63	4.5e-06	4.97e-05
Ppcdc	1.1	2.14	0.55	1.47	5.1e-06	5.56e-05
Echdc2	1.1	2.14	3.23	9.4	2.7e-05	0.000244862
Dyrk1b	1.1	2.15	0.05	1.04	0.00031004	0.0020046
Fmo1	1.1	2.14	0	1	0.000565556	0.00333668
Slc43a2	1.1	2.15	0.37	1.29	0.00424617	0.0180559
Rab32	1.1	2.14	-0.99	0.5	0.013168	0.0450118
Csf1r	1.09	2.12	2.07	4.19	8.51e-07	1.11e-05
Rcn3	1.09	2.13	0.61	1.53	5.71e-05	0.000468302
Dbndd2	1.09	2.12	0.16	1.12	6.57e-05	0.000525554
Sulf2	1.09	2.13	0.77	1.7	7.12e-05	0.000563121
Lgmn	1.09	2.13	0.92	1.89	0.000192312	0.00132894
Myl9	1.09	2.14	0.22	1.17	0.00048244	0.00292374
Pigp	1.09	2.13	-0.42	0.75	0.000777952	0.0043877
Hipk2	1.09	2.13	0.76	1.69	0.00105952	0.00569973
Sdc3	1.09	2.13	0.96	1.94	0.00131765	0.00681985
Ttc30b	1.09	2.13	-0.26	0.84	0.00331688	0.0147404
Aim1	1.09	2.13	-0.78	0.58	0.00866727	0.0324169
Ptgis	1.09	2.13	-0.4	0.76	0.0115137	0.0405193
Ampd3	1.09	2.13	-0.56	0.68	0.0143047	0.047985
Alcam	1.08	2.12	3.96	15.55	2.65e-07	3.91e-06
S100a10	1.08	2.11	0.91	1.87	3.92e-05	0.000336854
Slc8a1	1.08	2.11	0.5	1.42	6.24e-05	0.000503977
Bgn	1.08	2.12	2.95	7.72	0.000114578	0.000850252
Ppm1m	1.08	2.11	-0.01	0.99	0.000623143	0.00362017
Siae	1.08	2.12	0.17	1.13	0.000834703	0.00465652
Tpm2	1.08	2.11	-1	0.5	0.00737325	0.0284385
Clic1	1.07	2.1	2.01	4.03	3.41e-10	7.96e-09
Creld1	1.07	2.1	0.33	1.25	0.000123984	0.000909508
Acss2	1.07	2.1	1.18	2.27	0.00022704	0.00152772
Pld1	1.07	2.11	0.43	1.35	0.000286519	0.00187141
Tspan7	1.07	2.11	0.77	1.7	0.000460083	0.00281825
4-Sep	1.07	2.11	-0.35	0.78	0.00228556	0.0107914
Zfp7	1.07	2.1	-0.3	0.81	0.00262603	0.0121067
Sned1	1.07	2.1	-0.39	0.76	0.00413989	0.0176921
Cys1	1.07	2.09	-0.88	0.54	0.00440623	0.018636
BC026585	1.07	2.09	-0.52	0.7	0.0136571	0.0462976
Golim4	1.06	2.08	2.4	5.26	1.09e-10	2.83e-09
Usp54	1.06	2.09	2.24	4.72	1.79e-10	4.47e-09
Cp	1.06	2.09	2.44	5.44	1.17e-09	2.5e-08
Ly6a	1.06	2.09	1.89	3.72	0.00011491	0.000852097
Tmem132a	1.06	2.08	-0.09	0.94	0.000674178	0.00387524
Btd	1.06	2.09	-0.05	0.97	0.00121317	0.00638853
Sdc2	1.06	2.08	0.63	1.55	0.00144614	0.00737317
Ecm2	1.06	2.08	-0.4	0.76	0.00456676	0.0191961
Clec10a	1.06	2.08	-0.26	0.84	0.0109557	0.0390652
Cox17	1.05	2.08	2.52	5.73	1.06e-08	1.93e-07
Plxnb1	1.05	2.07	2.92	7.56	5.4e-08	8.73e-07
Irf2bp2	1.05	2.07	3.75	13.47	2.82e-07	4.14e-06
Adipor2	1.05	2.07	3.89	14.82	3.89e-07	5.57e-06
Sipa1l1	1.05	2.07	0.83	1.78	3.01e-05	0.000269807
Sirpa	1.05	2.06	0.84	1.79	0.00035853	0.00226245
Fbln1	1.05	2.07	0.36	1.29	0.000549738	0.00326063
Ccdc57	1.05	2.07	0.03	1.02	0.00177873	0.00880177
Tcf7l2	1.05	2.07	0.4	1.32	0.00178694	0.008836
Prosc	1.04	2.06	2.43	5.39	6.4e-10	1.42e-08
Txndc12	1.04	2.06	1.52	2.87	1.01e-08	1.86e-07
Oplah	1.04	2.05	1.02	2.03	5.06e-06	5.52e-05
Itpr1	1.04	2.05	0.95	1.94	9.28e-06	9.45e-05
Igfbp4	1.04	2.06	3.27	9.63	2.57e-05	0.00023441
Mrc1	1.04	2.05	1.3	2.46	2.96e-05	0.000265301
Tspan3	1.04	2.05	2.61	6.12	3.11e-05	0.000277596
Procr	1.04	2.05	0.84	1.79	6e-05	0.000488787
Irf1	1.04	2.05	1.32	2.5	0.000138676	0.00100152
Zfp26	1.04	2.05	0.12	1.09	0.000415269	0.00256521
Mfap5	1.04	2.05	-0.02	0.99	0.00305291	0.013722
Cep19	1.04	2.05	-0.33	0.8	0.00649072	0.0257219
Ift80	1.04	2.05	-0.25	0.84	0.00782834	0.0298789
Myo5a	1.04	2.06	0.25	1.19	0.0105298	0.0378631
Zfp809	1.03	2.04	0.82	1.77	8.49e-06	8.72e-05
Tgif1	1.03	2.05	0.53	1.45	3.58e-05	0.0003135
Parp12	1.03	2.04	0.8	1.75	0.000164761	0.00116286
Zfp606	1.03	2.04	-0.18	0.88	0.0016426	0.00820741
Optn	1.03	2.04	-0.41	0.75	0.00223911	0.0105988
Egflam	1.03	2.04	-0.44	0.74	0.00326022	0.0145454
H2-Q2	1.03	2.04	0.45	1.36	0.0044265	0.0186909
Cd44	1.03	2.04	-0.25	0.84	0.0051188	0.0209914
Tmem98	1.02	2.03	1.73	3.31	4.44e-09	8.48e-08
Pdgfra	1.02	2.03	1.16	2.24	5.94e-07	8.15e-06
Scp2	1.02	2.02	2.23	4.69	1.51e-06	1.89e-05
Fstl1	1.02	2.03	2.07	4.19	1.13e-05	0.000111828
Ssbp4	1.02	2.03	0.92	1.9	0.000186156	0.00129075
Thbs2	1.02	2.02	0.63	1.55	0.000435228	0.00267399
Sod3	1.02	2.02	0.01	1.01	0.00216204	0.0103198
Ccp110	1.02	2.03	-0.48	0.72	0.00879481	0.0327104
Ehd1	1.01	2.01	2.58	5.97	6.37e-09	1.2e-07
Fam149a	1.01	2.01	3.77	13.68	9.32e-06	9.47e-05
Erap1	1.01	2.01	1.08	2.11	2.1e-05	0.000195818
Rrm1	1.01	2.02	0.56	1.47	3.23e-05	0.000286015
Ccdc82	1.01	2.01	-0.46	0.73	0.0065116	0.0257449
Csrnp1	1.01	2.01	-0.75	0.59	0.00820964	0.0310623
Kit	1	2	2.64	6.23	7.03e-09	1.31e-07
Secisbp2l	1	1.99	3.03	8.19	4.82e-08	7.83e-07
Fat1	1	2	2.18	4.53	1e-06	1.29e-05
Nat6	1	2	1.26	2.4	3.26e-06	3.73e-05
Flna	1	2	3.05	8.3	4.95e-05	0.000413827
4930402H24Rik	1	1.99	0.63	1.54	9.62e-05	0.00072735
Tmem260	1	2.01	0.42	1.34	0.000473941	0.00288198
Hspa4l	1	2	-0.04	0.97	0.00130845	0.00679278
Lnx1	1	2	-0.09	0.94	0.00243498	0.0114048
Cntrob	1	2	-0.89	0.54	0.00659427	0.0259417
Fcna	1	2	0.04	1.03	0.00672349	0.0263791
BC053749	1	2	-0.49	0.71	0.0126517	0.0437136
Tank	0.99	1.99	3.14	8.83	9.39e-07	1.22e-05
Myof	0.99	1.99	0.38	1.31	0.000314261	0.0020255
Dpyd	0.99	1.99	0.14	1.11	0.000732367	0.00416961
Stard8	0.99	1.99	0.09	1.06	0.00151665	0.00767535
Gdf10	0.99	1.98	1.46	2.74	0.00199526	0.00967082
Tagln	0.99	1.99	0.66	1.58	0.00466539	0.0195226
Dse	0.99	1.99	-0.55	0.68	0.00489158	0.0202377
Gm5918	0.99	1.99	-0.93	0.52	0.00616169	0.0246083
Acp5	0.99	1.98	0.3	1.23	0.00882959	0.0327609
AW112010	0.99	1.99	-0.25	0.84	0.00889991	0.0329383
Pcp4l1	0.99	1.98	-0.09	0.94	0.0138061	0.0466947
Pcm1	0.98	1.97	1.92	3.78	8.69e-07	1.13e-05
Vwa5a	0.98	1.97	1.38	2.61	9.65e-07	1.25e-05
Tpgs1	0.98	1.98	0.47	1.38	0.000102113	0.000766075
S100a13	0.98	1.97	0.06	1.05	0.000447635	0.00274692
Axin2	0.98	1.97	0.33	1.26	0.000469805	0.00286411
Haghl	0.98	1.98	-0.21	0.87	0.00129825	0.0067467
Parva	0.97	1.96	3.28	9.7	1.83e-07	2.76e-06
Limk2	0.97	1.95	2.73	6.65	1.41e-06	1.77e-05
Dsc2	0.97	1.96	1.33	2.51	4.89e-06	5.36e-05
Abr	0.97	1.95	1.51	2.86	5.46e-06	5.9e-05
Znrf3	0.97	1.96	0.68	1.6	7.23e-05	0.000570843
Cd163	0.97	1.96	0.81	1.76	0.000326692	0.00208594
Pkig	0.97	1.96	0	1	0.000670632	0.00386
Alad	0.97	1.96	2.7	6.52	0.000942326	0.00514489
Tnfrsf12a	0.97	1.96	0.13	1.1	0.00112402	0.00597454
2610008E11Rik	0.97	1.96	0.24	1.18	0.00276295	0.0126631
Uba7	0.97	1.96	0.56	1.47	0.00465015	0.0194668
Hmgn1	0.97	1.96	0.22	1.17	0.00483582	0.0200685
Cbx2	0.97	1.96	-1.03	0.49	0.0139807	0.0471035
Ddx26b	0.96	1.94	3.44	10.84	5.4e-07	7.45e-06
Abca8a	0.96	1.94	1.78	3.43	1.32e-06	1.68e-05
Oat	0.96	1.94	3.05	8.27	5.7e-06	6.13e-05
Akap13	0.96	1.95	1.84	3.58	1.58e-05	0.000151952
Aaas	0.96	1.95	0.74	1.67	0.000427232	0.00262644
H2-D1	0.96	1.94	3.88	14.73	0.000474143	0.00288198
Cmtm3	0.96	1.94	-0.3	0.81	0.00379478	0.0164853
Rarres2	0.96	1.95	-0.3	0.81	0.0040759	0.01746
Lpar6	0.96	1.94	0.24	1.18	0.00508294	0.020861
Nbeal1	0.96	1.95	-0.41	0.75	0.00697405	0.0271956
Gpd2	0.95	1.93	1.98	3.94	8.41e-09	1.56e-07
Tgfbr2	0.95	1.93	1.86	3.63	2.24e-05	0.000207138
Slit3	0.95	1.93	1.16	2.24	7.2e-05	0.000569115
Slc25a32	0.95	1.93	0.76	1.7	7.5e-05	0.000588171
Maob	0.95	1.94	1.19	2.29	8.4e-05	0.000648944
Uap1	0.95	1.93	3.16	8.96	0.000107114	0.000801242
Nup133	0.95	1.93	0.4	1.32	0.000108388	0.000808999
Zfhx2	0.95	1.93	0.7	1.63	0.00159432	0.00800521
Ints2	0.95	1.93	-0.05	0.97	0.00161879	0.00810028
C1s	0.94	1.92	2.32	5.01	1.14e-07	1.78e-06
Bre	0.94	1.91	1.85	3.62	1.22e-07	1.88e-06
Smpd2	0.94	1.92	2.26	4.78	1.58e-07	2.42e-06
Atp8b1	0.94	1.92	4.14	17.67	3.35e-07	4.85e-06
Per1	0.94	1.92	2.65	6.28	1.24e-06	1.59e-05
Cd9	0.94	1.92	1.6	3.03	1.93e-06	2.36e-05
Rab4b	0.94	1.92	1.22	2.34	1.08e-05	0.000108399
Casp2	0.94	1.91	0.8	1.75	5.56e-05	0.000458519
Hsdl2	0.94	1.92	0.66	1.58	0.00012043	0.000889167
Col6a3	0.94	1.92	2	3.99	0.000205893	0.00141137
C230081A13Rik	0.94	1.92	0.69	1.61	0.000347595	0.00220294
Gramd1b	0.94	1.92	0.52	1.43	0.000491827	0.00296137
Myh11	0.94	1.92	0.92	1.89	0.00053224	0.0031767
Gpx3	0.94	1.92	2.31	4.94	0.00256575	0.0118762
Colec12	0.94	1.92	0.32	1.25	0.00323502	0.0144518
Wdsub1	0.94	1.91	-0.05	0.97	0.00358675	0.0157081
Zfp760	0.94	1.92	-0.39	0.76	0.00396077	0.0170546
Cmklr1	0.94	1.91	-0.25	0.84	0.00744265	0.028663
Rab31	0.94	1.92	-0.56	0.68	0.00814898	0.0308841
Pmepa1	0.94	1.92	-0.45	0.73	0.0101618	0.0367918
St6galnac2	0.93	1.91	3.46	10.99	2.1e-06	2.53e-05
Chdh	0.93	1.9	3.08	8.46	3.34e-06	3.8e-05
Psap	0.93	1.91	4.97	31.26	9.36e-06	9.51e-05
Ckap4	0.93	1.9	1.2	2.3	1.43e-05	0.000138466
Ctsf	0.93	1.91	1.3	2.46	2.21e-05	0.000205203
Krtcap3	0.93	1.9	0.55	1.46	6.29e-05	0.000507038
Zfp750	0.93	1.91	0.54	1.45	0.000339983	0.00215737
Churc1	0.93	1.91	0.67	1.59	0.000401074	0.00250013
Ints9	0.93	1.91	0.05	1.03	0.000572292	0.00336767
Sult1a1	0.93	1.9	0.53	1.44	0.00192851	0.00941566
Ahdc1	0.93	1.91	0.14	1.1	0.00441934	0.0186684
Cebpd	0.93	1.9	0.1	1.07	0.00512336	0.0210017
Gm5480	0.93	1.91	-0.25	0.84	0.00652291	0.0257698
App	0.92	1.89	4.93	30.43	3.08e-06	3.54e-05
Ergic3	0.92	1.9	4.04	16.4	5.25e-06	5.7e-05
Ifngr1	0.92	1.89	1.24	2.37	2.74e-05	0.000248154
Ankrd50	0.92	1.89	1.24	2.37	3.63e-05	0.000315995
Hsd17b4	0.92	1.9	2.38	5.2	4.76e-05	0.000399757
Tsc22d3	0.92	1.9	2.96	7.78	0.00036252	0.00228622
Mir3064	0.92	1.9	0.46	1.37	0.000401981	0.00250273
B4galt6	0.92	1.89	0.72	1.65	0.000464843	0.002844
2810474O19Rik	0.92	1.89	0.46	1.38	0.000982604	0.00533412
Pnp	0.92	1.89	0.69	1.61	0.00128253	0.00668095
Scn7a	0.92	1.89	0.22	1.16	0.00225748	0.0106759
Vwf	0.92	1.89	0.83	1.78	0.00249545	0.0116298
Rgma	0.92	1.9	0	1	0.0026453	0.0121838
Atp8a2	0.92	1.89	-0.49	0.71	0.00634458	0.0252013
Ctsb	0.91	1.88	5.53	46.14	7.55e-07	1.01e-05
Axl	0.91	1.88	1.83	3.56	8.1e-07	1.07e-05
Acpl2	0.91	1.88	2.19	4.56	0.000117954	0.000873023
Apbb3	0.91	1.88	0.55	1.47	0.000139224	0.00100406
Supt20	0.91	1.88	0.73	1.66	0.000174636	0.00121829
Mmp15	0.91	1.88	2.73	6.65	0.000178409	0.00123955
Igfbp6	0.91	1.88	1.82	3.53	0.000208361	0.00142258
Arhgef40	0.91	1.88	0.56	1.48	0.000318763	0.00204808
Zfp329	0.91	1.87	0.01	1.01	0.00128382	0.00668186
Tgfbr3	0.91	1.88	0.42	1.34	0.00140535	0.00719975
Efna1	0.91	1.88	-0.36	0.78	0.00497687	0.0204996
Parp4	0.91	1.88	0.56	1.47	0.00948785	0.0346636
Naip2	0.91	1.88	0.29	1.23	0.0107498	0.0385053
Gramd1c	0.91	1.88	-0.29	0.82	0.0136226	0.046196
Gcc2	0.9	1.86	1.75	3.36	1.03e-05	0.000103679
C1ra	0.9	1.87	0.61	1.53	0.000122086	0.000899454
Emp1	0.9	1.86	1.54	2.91	0.000292867	0.00190438
Ppp1r9a	0.9	1.87	0.66	1.58	0.00195703	0.00951461
Myo19	0.9	1.87	0.44	1.35	0.00223372	0.0105831
Gm13498	0.9	1.87	-0.32	0.8	0.0111311	0.0394575
Fasn	0.9	1.87	4.42	21.44	0.0145645	0.0486815
Pbxip1	0.89	1.85	1.94	3.82	4.26e-07	6e-06
Sec23b	0.89	1.85	4.32	20.03	1.73e-06	2.14e-05
Pvrl2	0.89	1.86	2.29	4.88	3.06e-06	3.53e-05
Lgals9	0.89	1.85	3.1	8.55	4.25e-06	4.72e-05
Ces1d	0.89	1.85	2.4	5.28	5.64e-06	6.09e-05
Atpif1	0.89	1.85	1.36	2.56	2.05e-05	0.000191276
Fcgrt	0.89	1.85	1.07	2.1	2.45e-05	0.00022438
Ccs	0.89	1.85	1.77	3.42	5.64e-05	0.000463813
Phf15	0.89	1.85	1.19	2.29	0.000107564	0.000803439
Peli2	0.89	1.86	0.34	1.27	0.00071604	0.00408801
Cers5	0.89	1.86	0.56	1.47	0.0010567	0.00568755
Ifi35	0.89	1.85	0.51	1.42	0.0015535	0.00782323
D17H6S53E	0.89	1.85	-0.06	0.96	0.00205419	0.00990186
Npr2	0.89	1.86	-0.18	0.88	0.00214326	0.0102445
Tmem231	0.89	1.85	-0.11	0.93	0.00487744	0.0201956
Vps45	0.89	1.85	-0.36	0.78	0.00689558	0.0269306
Rprd1a	0.89	1.85	-0.17	0.89	0.00857109	0.032121
Coq7	0.89	1.86	0	1	0.00970306	0.0353616
Pnpo	0.88	1.84	2.36	5.14	6.07e-08	9.77e-07
Wls	0.88	1.84	2.11	4.33	8.14e-07	1.07e-05
Prkag1	0.88	1.84	3.1	8.57	3.82e-06	4.28e-05
Gria3	0.88	1.84	0.54	1.46	0.00189179	0.00926834
Sirt6	0.88	1.84	-0.11	0.93	0.00200384	0.00970478
Abi3bp	0.88	1.84	-0.11	0.93	0.00213607	0.0102269
Nphp3	0.88	1.84	-0.2	0.87	0.0040874	0.0174896
Mrc2	0.88	1.84	-0.01	0.99	0.00560827	0.0227395
Asb11	0.88	1.85	0.47	1.39	0.0065059	0.0257422
Sgk1	0.88	1.84	4.72	26.39	0.00966101	0.0352209
1810043G02Rik	0.88	1.85	-0.54	0.69	0.0120641	0.0421209
Atp8b2	0.88	1.84	0.15	1.11	0.0132524	0.0451948
Mapk13	0.87	1.83	1.78	3.43	2.02e-06	2.45e-05
Fhod1	0.87	1.82	1.21	2.32	6.43e-06	6.82e-05
Pwwp2a	0.87	1.82	1.44	2.71	7.39e-06	7.75e-05
Ctnnd1	0.87	1.83	4.14	17.59	8.46e-06	8.7e-05
Acsl1	0.87	1.83	2.98	7.89	5.39e-05	0.00044674
Cpm	0.86	1.82	1.86	3.64	4.92e-07	6.84e-06
Ifitm2	0.86	1.81	2.26	4.8	8.24e-07	1.08e-05
Pld3	0.86	1.82	4.52	22.99	1.59e-05	0.000153565
Bax	0.86	1.82	1.3	2.47	7.88e-05	0.00061337
Ift81	0.86	1.81	0.16	1.12	0.00129146	0.00671479
Pik3ap1	0.86	1.81	2.89	7.43	0.00137393	0.00706828
Loxl2	0.86	1.82	0.74	1.67	0.00485631	0.0201243
Col18a1	0.86	1.81	1.01	2.02	0.00533735	0.021783
Kdelc2	0.86	1.81	-0.33	0.8	0.0146139	0.0487511
Atf7ip	0.86	1.81	0.89	1.85	0.0147382	0.0490539
Nfe2l2	0.85	1.8	2.56	5.9	8.6e-07	1.12e-05
Tusc3	0.85	1.8	1.63	3.1	5.28e-06	5.72e-05
Tmsb4x	0.85	1.81	4.58	23.99	0.000149774	0.0010696
Rcbtb2	0.85	1.81	0.88	1.84	0.000169687	0.00119107
Tm4sf4	0.85	1.81	1.44	2.72	0.000593077	0.00346711
4930455F23Rik	0.85	1.81	0.33	1.26	0.000930005	0.0050939
Ext1	0.85	1.8	0.77	1.71	0.00105402	0.00567607
Actb	0.85	1.8	4.53	23.11	0.00106992	0.00572858
Slc40a1	0.85	1.8	1.44	2.72	0.00483697	0.0200685
Gpr133	0.85	1.8	0.58	1.49	0.00752512	0.0289371
Cav2	0.85	1.8	0.17	1.13	0.00877325	0.032667
Apool	0.85	1.81	-0.19	0.88	0.0107549	0.0385101
Taf1b	0.85	1.81	-0.64	0.64	0.0129396	0.0444385
Atp8a1	0.85	1.8	-0.13	0.91	0.0135417	0.0459519
Ptpla	0.85	1.81	-0.15	0.9	0.0150705	0.0499169
Krt23	0.84	1.79	1.98	3.93	1.81e-06	2.22e-05
Abhd4	0.84	1.78	1.9	3.74	2.26e-06	2.7e-05
Spg7	0.84	1.79	1.71	3.27	4.31e-06	4.77e-05
Hspa8	0.84	1.79	2.66	6.31	2.01e-05	0.000188727
Ccng1	0.84	1.79	3.93	15.25	3.25e-05	0.000287845
Aaed1	0.84	1.79	0.89	1.86	0.000121612	0.000896607
Trim32	0.84	1.79	0.95	1.93	0.000216925	0.00147431
Sft2d2	0.84	1.8	3.04	8.23	0.000285504	0.00186597
Txnip	0.84	1.8	4.71	26.19	0.000324724	0.00207726
Mdc1	0.84	1.8	1.09	2.13	0.000475644	0.00288793
Bcl9	0.84	1.79	0.88	1.84	0.000997796	0.00540741
Neil1	0.84	1.79	-0.34	0.79	0.00822052	0.0310749
Sorbs3	0.83	1.77	2.6	6.06	5.91e-07	8.12e-06
Hltf	0.83	1.78	1.15	2.22	2.41e-05	0.000221487
Fam129b	0.83	1.78	3.48	11.15	3.01e-05	0.000269807
Crip1	0.83	1.78	1.15	2.21	0.000206929	0.00141468
Kifap3	0.83	1.77	0.6	1.52	0.000577909	0.00339705
Pmp22	0.83	1.77	0.71	1.64	0.00139604	0.00715686
Gstm4	0.83	1.77	0	1	0.00258518	0.0119424
Npr1	0.83	1.78	0.3	1.23	0.00366592	0.0159933
Nck2	0.83	1.78	0.16	1.11	0.00570135	0.0230301
Sema4b	0.83	1.78	0.39	1.31	0.00741293	0.0285593
Fam3c	0.83	1.78	1.35	2.55	0.00792152	0.0301784
Zeb1	0.83	1.78	-0.14	0.91	0.00894235	0.0330477
Plekho1	0.83	1.78	-0.44	0.74	0.00901315	0.0332255
Bnip2	0.82	1.76	1.56	2.96	6.38e-06	6.77e-05
Gpc3	0.82	1.77	1.62	3.08	1.24e-05	0.000121236
Tcn2	0.82	1.76	3.31	9.93	0.00014836	0.00106184
Dmpk	0.82	1.76	0.68	1.6	0.000273826	0.00179882
Serping1	0.82	1.77	2.91	7.49	0.000710436	0.00406507
Wwtr1	0.82	1.77	0.54	1.45	0.000919094	0.00504222
Lman2l	0.82	1.77	0.92	1.9	0.00110183	0.00586575
Pdgfa	0.82	1.77	1.55	2.94	0.00417703	0.0178079
Zfp182	0.82	1.77	-0.15	0.9	0.00472961	0.0197189
Cttnbp2nl	0.82	1.76	-0.03	0.98	0.0145977	0.0487288
Pi16	0.81	1.75	0.68	1.6	0.000816105	0.00457769
Pgd	0.81	1.75	1.85	3.6	0.000840117	0.00468228
Ghdc	0.81	1.76	0.42	1.34	0.00113519	0.00602768
AI661453	0.81	1.75	1.79	3.45	0.00125441	0.00656211
Fbn1	0.81	1.75	2.89	7.43	0.00254895	0.0118228
Tm7sf3	0.81	1.75	0.58	1.49	0.0031583	0.0141464
3830406C13Rik	0.81	1.75	0.62	1.53	0.00375315	0.0163322
Bst2	0.81	1.75	1	2	0.00460825	0.019323
Dcp2	0.81	1.76	0.23	1.17	0.00592171	0.023789
Col20a1	0.81	1.75	0.07	1.05	0.0079371	0.030204
Trrap	0.8	1.74	2.53	5.77	3.07e-06	3.54e-05
Ccni	0.8	1.74	2.15	4.45	6.39e-06	6.78e-05
Muc1	0.8	1.75	5.58	47.98	1.69e-05	0.000160976
Prkab1	0.8	1.74	1.29	2.45	2.23e-05	0.00020648
Ifi30	0.8	1.74	3.01	8.07	4.27e-05	0.000363645
Tmc4	0.8	1.74	2.81	7.03	4.46e-05	0.000378368
Mob3b	0.8	1.74	1.8	3.48	8.1e-05	0.000628264
Tubb5	0.8	1.74	2.98	7.87	0.000290347	0.0018928
Lrp1	0.8	1.74	3.19	9.15	0.000322156	0.00206341
Scd2	0.8	1.74	5.23	37.61	0.000712912	0.00407242
Pik3c2b	0.8	1.74	0.77	1.7	0.000822248	0.00460207
Degs1	0.8	1.75	4.2	18.32	0.000891278	0.00492921
Zfp219	0.8	1.74	0.85	1.8	0.00120117	0.00633581
Ift57	0.8	1.74	0.25	1.19	0.00145606	0.00741265
Thbd	0.8	1.74	1.61	3.06	0.00194142	0.00946797
Notch2	0.8	1.74	1.02	2.03	0.00213371	0.0102227
Alkbh6	0.8	1.74	0.67	1.6	0.00277366	0.0127008
Pgap3	0.8	1.75	-0.01	1	0.0072409	0.0280229
Tm9sf3	0.79	1.73	5.41	42.66	5.54e-05	0.00045756
Ltbp4	0.79	1.73	3.41	10.66	8.47e-05	0.0006528
Mlph	0.79	1.73	1.39	2.62	0.000156003	0.00111022
9930021J03Rik	0.79	1.73	1.16	2.23	0.000161402	0.00114467
Capn1	0.79	1.73	1.42	2.68	0.000162513	0.00114858
Itsn1	0.79	1.73	0.85	1.8	0.000365133	0.00230128
Gss	0.79	1.73	0.57	1.48	0.000523809	0.00313368
Mknk2	0.79	1.73	2.41	5.3	0.00294477	0.0133177
Cd248	0.79	1.73	0.98	1.97	0.00727973	0.0281626
Il13ra1	0.79	1.73	0.31	1.24	0.00760158	0.0291546
Frmd8	0.79	1.73	0.48	1.39	0.00762439	0.0292093
Zfp60	0.79	1.73	-0.21	0.86	0.0146368	0.0488117
Dek	0.78	1.71	1.41	2.66	6.19e-05	0.000500747
Itih5	0.78	1.72	1.67	3.19	0.000321744	0.00206274
Stk17b	0.78	1.72	1.24	2.37	0.000907082	0.00499236
Eln	0.78	1.71	1.02	2.02	0.00209414	0.0100613
Hat1	0.78	1.72	0.04	1.03	0.00789099	0.0300956
Nrep	0.78	1.72	0.18	1.13	0.00820656	0.0310623
Msn	0.78	1.71	1.94	3.84	0.00894677	0.0330521
Gm12942	0.78	1.72	-0.16	0.9	0.0145914	0.0487234
Mll5	0.77	1.7	2.58	6	1.93e-05	0.000181697
Phactr4	0.77	1.71	1.88	3.69	3.78e-05	0.00032712
Pea15a	0.77	1.7	1.6	3.02	4.02e-05	0.000344658
Fryl	0.77	1.71	2.48	5.59	0.000141761	0.0010202
Pigu	0.77	1.71	0.88	1.84	0.000263008	0.00173971
Cldn3	0.77	1.7	3.49	11.23	0.00214733	0.0102543
Galnt11	0.77	1.71	1.8	3.48	0.00423015	0.0180102
Zfp426	0.77	1.7	0.36	1.28	0.00469775	0.01961
Cyp2d22	0.77	1.71	0.2	1.15	0.0128104	0.0441132
Casp3	0.77	1.7	-0.32	0.8	0.0137967	0.0466936
Dopey2	0.77	1.7	0.19	1.14	0.0139262	0.0470079
Acaa2	0.76	1.69	2.7	6.48	1.7e-05	0.000161778
H2afj	0.76	1.69	2.46	5.48	3.8e-05	0.000328186
Adam15	0.76	1.69	1.63	3.09	4.42e-05	0.000375462
Abca2	0.76	1.7	2.78	6.87	7.81e-05	0.000608864
Smo	0.76	1.7	1.1	2.15	7.99e-05	0.000620468
Lrpap1	0.76	1.7	2.9	7.48	0.000114064	0.000847047
S100a1	0.76	1.69	2.2	4.6	0.000129343	0.00094141
Arhgap29	0.76	1.69	2.35	5.1	0.000255947	0.0016977
Helz2	0.76	1.7	2.18	4.53	0.000312475	0.0020178
Islr	0.76	1.69	1.28	2.42	0.00032466	0.00207726
Gclc	0.76	1.69	2.11	4.32	0.00122757	0.00644145
Suox	0.76	1.7	0.45	1.36	0.00938066	0.0343992
9430015G10Rik	0.76	1.69	-0.02	0.99	0.0116167	0.0407839
Lpp	0.75	1.69	2.45	5.45	1.12e-05	0.000111179
Ctps2	0.75	1.68	1.83	3.56	1.24e-05	0.000121254
Asph	0.75	1.68	1.64	3.13	1.35e-05	0.000130956
Tcf12	0.75	1.69	2.62	6.16	1.68e-05	0.000160421
Lurap1l	0.75	1.68	3.01	8.08	3.26e-05	0.000288304
Sfrs18	0.75	1.69	3.12	8.71	4.99e-05	0.000417106
Tmem63a	0.75	1.68	4.29	19.49	6.04e-05	0.000491267
Uhrf1bp1l	0.75	1.69	1.69	3.23	6.17e-05	0.000499808
Nosip	0.75	1.69	1.27	2.41	6.79e-05	0.000540956
4931406C07Rik	0.75	1.68	1.55	2.92	7.07e-05	0.000560821
Grhl2	0.75	1.68	1.45	2.74	8.3e-05	0.000641649
Dcn	0.75	1.68	4.8	27.77	9.08e-05	0.000691139
Ypel2	0.75	1.68	2.39	5.23	0.000135744	0.00098381
S100a6	0.75	1.69	1.34	2.53	0.000256644	0.00170122
Igfbp7	0.75	1.69	3.25	9.52	0.00134569	0.0069474
Ckmt1	0.75	1.69	0.51	1.43	0.00255076	0.0118228
Pold1	0.75	1.68	0.17	1.12	0.00337432	0.0149568
Atr	0.75	1.68	0.46	1.37	0.00376304	0.0163613
Rab8b	0.75	1.68	0.26	1.2	0.00400913	0.0172339
Lamb1	0.75	1.68	1.88	3.67	0.0106089	0.0380939
Pisd	0.74	1.66	2.24	4.74	4.23e-06	4.7e-05
Lsr	0.74	1.67	2.71	6.56	1.19e-05	0.000117309
Cyp4f13	0.74	1.67	1.81	3.51	3.47e-05	0.000304663
Glg1	0.74	1.67	2.03	4.1	3.66e-05	0.000318546
Cbr1	0.74	1.68	3.03	8.17	4.23e-05	0.000361137
Atraid	0.74	1.67	2.04	4.12	4.56e-05	0.000384696
Tbc1d19	0.74	1.67	1.62	3.06	5.75e-05	0.000470671
Dmbt1	0.74	1.67	11.81	3594.45	8.49e-05	0.00065284
Aldh3a2	0.74	1.67	3.16	8.95	8.7e-05	0.000668189
Gtpbp2	0.74	1.67	3.12	8.66	9.17e-05	0.000697949
Tnrc18	0.74	1.67	1.92	3.79	0.000136476	0.00098793
Iqgap1	0.74	1.66	3.67	12.71	0.000149133	0.00106577
Fam110c	0.74	1.67	1	2	0.000166223	0.00116915
Wnk4	0.74	1.67	1.34	2.54	0.00157387	0.00791026
Cnot6	0.74	1.68	0.43	1.34	0.00298178	0.0134614
Retnla	0.74	1.68	1.1	2.14	0.00523669	0.0213892
Mpzl2	0.74	1.68	0.89	1.85	0.00683138	0.0267512
1700052N19Rik	0.74	1.67	0.11	1.08	0.00694706	0.0271007
Cd97	0.74	1.67	1.23	2.35	0.00854297	0.0320455
Slc25a4	0.74	1.68	1.15	2.22	0.0110263	0.0392419
Ppp1r13b	0.73	1.66	2.53	5.77	3.21e-06	3.68e-05
Slc44a2	0.73	1.66	2.37	5.18	1.14e-05	0.000112624
Nenf	0.73	1.66	1.88	3.68	7.61e-05	0.000595755
Stam	0.73	1.66	1.39	2.62	0.000123251	0.000905434
Irf6	0.73	1.66	3.78	13.78	0.000204356	0.00140459
Arl6ip1	0.73	1.66	1.69	3.23	0.000209115	0.00142677
Ankzf1	0.73	1.66	1.01	2.01	0.000236976	0.0015821
Sbno2	0.73	1.66	1.37	2.59	0.000653525	0.00377527
Tnxb	0.73	1.66	1.9	3.73	0.000965952	0.00525708
Bmp1	0.73	1.66	1.09	2.13	0.00135152	0.00696698
Ogfod3	0.73	1.66	0.63	1.55	0.00185946	0.00912629
Efemp1	0.73	1.66	1.82	3.53	0.00212442	0.0101877
Erbb3	0.73	1.65	0.84	1.79	0.00235483	0.01108
Casp8	0.73	1.66	0.55	1.46	0.00347213	0.0152911
Nubp1	0.73	1.66	0.38	1.3	0.00652045	0.0257698
Cplx2	0.73	1.66	0.89	1.85	0.00880915	0.0327104
Invs	0.73	1.66	-0.19	0.88	0.0141935	0.047659
Prkcsh	0.72	1.65	2.55	5.85	1.39e-05	0.000135016
Tbc1d17	0.72	1.65	1.88	3.68	2.46e-05	0.000225075
Xiap	0.72	1.65	2.23	4.68	4.71e-05	0.000395777
Acsl5	0.72	1.65	2.19	4.56	6.96e-05	0.000553419
Tspo	0.72	1.65	1.34	2.54	7.09e-05	0.000562085
Add3	0.72	1.65	1.64	3.12	9.51e-05	0.000720505
Tjp3	0.72	1.64	1.53	2.89	0.000102483	0.000768287
Heatr5a	0.72	1.65	1.77	3.42	0.000219579	0.00148826
Sdf2	0.72	1.65	2.22	4.67	0.00023262	0.00156014
Ociad2	0.72	1.65	2.78	6.86	0.000381634	0.00239938
Fkbp2	0.72	1.65	3.52	11.49	0.000513521	0.00308112
Khnyn	0.72	1.64	1.19	2.29	0.000982711	0.00533412
Engase	0.72	1.64	0.82	1.77	0.00173506	0.00859813
Tmem64	0.72	1.65	3.87	14.61	0.00292638	0.0132687
Dnajc9	0.72	1.65	-0.1	0.94	0.00857251	0.032121
Wipi1	0.71	1.63	2.07	4.19	1.92e-05	0.000180934
Clec3b	0.71	1.64	1.81	3.49	2.13e-05	0.000197745
Arrb2	0.71	1.63	2.59	6.01	2.59e-05	0.00023586
Ccdc167	0.71	1.64	2.06	4.16	0.00020786	0.0014201
Smoc2	0.71	1.63	2.22	4.66	0.000209408	0.00142782
Prr15l	0.71	1.63	3.84	14.29	0.000223153	0.0015065
Ahnak	0.71	1.64	3.23	9.41	0.000514543	0.00308545
Ablim1	0.71	1.63	2.41	5.31	0.000583053	0.00342218
Igfbp5	0.71	1.63	3.88	14.77	0.000585286	0.00343332
Nup205	0.71	1.64	0.96	1.95	0.000712107	0.00407009
Irf9	0.71	1.63	1.15	2.23	0.000941384	0.00514248
Npc1	0.71	1.63	1.01	2.01	0.00123338	0.00646861
Znfx1	0.71	1.64	1.55	2.93	0.0012691	0.00662545
Elmod3	0.71	1.63	0.67	1.59	0.00160104	0.00802319
Samhd1	0.71	1.64	1.73	3.31	0.00295605	0.0133629
Gprasp1	0.71	1.64	1.43	2.7	0.0055183	0.0224144
Map4	0.71	1.63	1.72	3.3	0.00567421	0.0229658
Atg14	0.71	1.64	0.06	1.04	0.00650564	0.0257422
Sgsm2	0.71	1.63	1.13	2.19	0.00679208	0.0266177
Cc2d2a	0.71	1.63	0.05	1.04	0.00687259	0.0268818
Mast4	0.71	1.64	0.22	1.16	0.00874999	0.0326191
Uros	0.71	1.64	0.82	1.77	0.00917755	0.0337465
Ermp1	0.71	1.64	0.72	1.65	0.0102349	0.0369711
Aebp1	0.71	1.64	2.01	4.04	0.011032	0.0392419
Leprel2	0.71	1.64	-0.1	0.93	0.0128946	0.0443586
Pnpla6	0.7	1.62	1.6	3.03	6.58e-05	0.000525753
Vcl	0.7	1.63	2.33	5.01	8.91e-05	0.000680613
Rnf43	0.7	1.63	1.72	3.3	0.000133642	0.000969943
Zdhhc1	0.7	1.63	1.24	2.36	0.000158894	0.00112845
Nit1	0.7	1.62	1.54	2.92	0.00020261	0.0013954
Xpo1	0.7	1.62	1.69	3.22	0.000253126	0.00168007
Ogn	0.7	1.62	1.55	2.92	0.00055538	0.00328876
Ttc23	0.7	1.62	1.04	2.06	0.000588584	0.00345069
Gtf2i	0.7	1.62	4.12	17.41	0.000592773	0.00346711
Fuca1	0.7	1.62	3.14	8.83	0.000710431	0.00406507
Htra1	0.7	1.62	1.2	2.3	0.000855448	0.00474899
Itpripl2	0.7	1.62	0.93	1.91	0.00137505	0.00707051
Arap2	0.7	1.62	0.79	1.72	0.00329201	0.0146461
Col15a1	0.7	1.63	2.39	5.24	0.00349761	0.0153901
Afm	0.7	1.63	0.88	1.84	0.00516769	0.0211665
Piga	0.7	1.63	1.24	2.37	0.005545	0.0224961
Myh14	0.7	1.62	0.79	1.73	0.00569979	0.0230301
Rhbdl1	0.7	1.63	0.18	1.13	0.00890825	0.0329462
Flywch1	0.7	1.62	0.45	1.37	0.0105935	0.0380654
Timm22	0.7	1.63	0.12	1.09	0.0110017	0.039202
Nfkb2	0.7	1.63	0.76	1.7	0.0110969	0.0394045
Rasgrp3	0.7	1.62	0.7	1.63	0.0116062	0.0407608
Tle2	0.69	1.61	2.6	6.07	2.92e-05	0.00026286
Clic6	0.69	1.61	2.93	7.61	0.000409015	0.00253268
Ssbp3	0.69	1.61	2.88	7.38	0.000880682	0.00487323
Glb1	0.69	1.62	2.55	5.84	0.000988373	0.00535918
Mfsd6	0.69	1.61	3.03	8.18	0.00159851	0.00801446
Myl6	0.69	1.61	0.86	1.81	0.0020413	0.00985363
Dcps	0.69	1.61	0.29	1.22	0.0125424	0.0434308
Bmpr1a	0.68	1.6	2.63	6.18	3.59e-05	0.000314117
Maged2	0.68	1.6	2.16	4.48	4.07e-05	0.000348826
Prr13	0.68	1.61	1.74	3.35	4.2e-05	0.000358549
Slc9a8	0.68	1.6	1.89	3.72	5.68e-05	0.000466631
Mbnl3	0.68	1.6	1.75	3.36	8.58e-05	0.00065952
Ift172	0.68	1.6	1.72	3.29	0.000312886	0.00201918
Impa1	0.68	1.6	1.98	3.96	0.000407539	0.00252654
Mkl2	0.68	1.6	1.65	3.13	0.000558381	0.00330005
Elf1	0.68	1.6	1.75	3.36	0.000589758	0.00345362
Hgfac	0.68	1.6	3.73	13.29	0.000666105	0.00383712
Xdh	0.68	1.6	1.28	2.43	0.00153478	0.00774797
Mtus1	0.68	1.6	4.82	28.24	0.00195714	0.00951461
Entpd6	0.68	1.6	0.55	1.47	0.00315384	0.0141447
Atox1	0.68	1.6	1.01	2.01	0.00356296	0.0156307
Lmo7	0.68	1.61	0.43	1.34	0.00666938	0.026197
Casp7	0.68	1.6	0.2	1.15	0.0141192	0.0474561
Serinc2	0.67	1.59	2.11	4.32	3.11e-05	0.000277596
Tjp2	0.67	1.59	1.79	3.46	6.26e-05	0.000505007
Psmd1	0.67	1.59	2.57	5.95	7.21e-05	0.000569332
Ppp1r1b	0.67	1.59	2.13	4.37	0.000300889	0.00195159
Slc25a36	0.67	1.59	1.89	3.7	0.000599228	0.0034951
Anxa1	0.67	1.6	1	2	0.000638835	0.00370502
Zfp236	0.67	1.59	2.03	4.1	0.000956771	0.00521819
Gpr56	0.67	1.59	3.44	10.86	0.00147098	0.00747379
Pds5b	0.67	1.59	0.77	1.71	0.00299267	0.0134927
Glt8d1	0.67	1.59	1.3	2.45	0.00364234	0.015904
Athl1	0.67	1.59	1.7	3.26	0.00872509	0.0325499
Bbs9	0.67	1.59	0.27	1.21	0.00985715	0.0358086
Med11	0.67	1.59	0.1	1.07	0.010535	0.0378683
Lzts2	0.66	1.58	2.46	5.5	2.81e-05	0.000253946
Grcc10	0.66	1.58	2.2	4.6	0.000125336	0.00091647
Cd47	0.66	1.59	1.72	3.29	0.000141546	0.00101937
Frk	0.66	1.58	2	4	0.000268557	0.00176989
Pbx1	0.66	1.58	2.06	4.18	0.000351383	0.00222419
Pnkd	0.66	1.58	1.95	3.85	0.000416502	0.00256973
Itgb5	0.66	1.58	1.96	3.89	0.000483467	0.002926
Crip2	0.66	1.58	1.02	2.02	0.00150082	0.00759901
Rbbp9	0.66	1.58	2.06	4.17	0.00184454	0.00907483
Zmat2	0.66	1.58	1.68	3.2	0.00209012	0.0100467
Gprc5c	0.66	1.58	1.36	2.57	0.00220541	0.010478
Slc35b4	0.66	1.58	0.64	1.56	0.00280182	0.0127784
Fxyd1	0.66	1.58	2.68	6.39	0.00868091	0.0324538
Myh10	0.66	1.58	0.52	1.43	0.0104902	0.0377339
Myl12b	0.65	1.57	2.12	4.35	3.63e-05	0.000315995
Chd6	0.65	1.57	2.73	6.62	0.000217473	0.00147691
Hadha	0.65	1.57	3.4	10.54	0.000291348	0.00189812
Ubl5	0.65	1.57	2.1	4.28	0.000395884	0.0024753
Grik5	0.65	1.57	1.26	2.4	0.000617196	0.00358804
Adar	0.65	1.57	1.86	3.64	0.000652231	0.00377204
Ptpn13	0.65	1.57	1.7	3.25	0.000721935	0.00411479
Rgmb	0.65	1.57	2	4.01	0.000920102	0.00504505
Pkdcc	0.65	1.57	1.71	3.27	0.00122023	0.00641276
Cstf3	0.65	1.57	0.89	1.85	0.00315836	0.0141464
Hook1	0.65	1.57	4.11	17.31	0.00342522	0.0151366
Lrrc16a	0.65	1.57	0.8	1.74	0.00428158	0.0181838
Lyn	0.65	1.57	0.84	1.79	0.00443397	0.0187147
Nrde2	0.65	1.57	0.41	1.33	0.00600429	0.0240641
Fdxr	0.65	1.57	0.48	1.4	0.00759547	0.0291461
Lcp1	0.65	1.57	2.73	6.61	0.00972835	0.0354286
Commd4	0.65	1.57	0.15	1.11	0.0117081	0.0410486
Adam9	0.64	1.56	2.32	5	6.24e-05	0.000503977
Rtkn	0.64	1.56	2	3.99	0.000123591	0.000907281
Tmbim4	0.64	1.56	2.38	5.2	0.000216945	0.00147431
Amotl1	0.64	1.56	2.75	6.7	0.000281181	0.00184007
Cyb561	0.64	1.56	2.33	5.04	0.00046932	0.00286286
Ick	0.64	1.56	1.7	3.24	0.000848177	0.00472141
Pdia4	0.64	1.56	3.45	10.89	0.00113654	0.00603173
Taf2	0.64	1.56	0.75	1.69	0.00239265	0.0112322
Mrpl33	0.64	1.56	0.77	1.71	0.00328419	0.0146205
Npc2	0.64	1.56	2.67	6.38	0.00353253	0.0155038
Tbc1d9	0.64	1.55	1.28	2.43	0.0036398	0.0158997
Llgl1	0.64	1.56	1.21	2.31	0.00385129	0.0166743
Ccdc104	0.64	1.56	0.98	1.97	0.00517372	0.0211827
Fbxl19	0.64	1.56	0.73	1.66	0.00539865	0.0219981
Ifi27l1	0.64	1.56	4.38	20.8	0.00791154	0.0301628
C1galt1	0.64	1.56	0.63	1.54	0.0110248	0.0392419
Zdhhc13	0.64	1.56	0.14	1.1	0.0133977	0.045569
Cttn	0.63	1.55	2.53	5.78	7.97e-05	0.000620062
Kif13b	0.63	1.55	1.97	3.92	0.000126955	0.000926002
Ncstn	0.63	1.54	2.77	6.81	0.000818003	0.00458332
Bscl2	0.63	1.55	3.12	8.7	0.00127287	0.00663836
Tmem176b	0.63	1.54	3.27	9.67	0.00173099	0.00858624
Slc6a6	0.63	1.55	2.07	4.2	0.00182031	0.00897285
Pcyox1	0.63	1.55	3.15	8.9	0.00212769	0.0101986
Hnf4a	0.63	1.55	2.82	7.05	0.00229747	0.01084
Rfc2	0.63	1.54	0.89	1.85	0.00240093	0.0112607
Prr12	0.63	1.55	1.41	2.66	0.00258454	0.0119424
Mterfd1	0.63	1.54	0.69	1.62	0.00423517	0.0180241
Fgfrl1	0.63	1.55	1.53	2.89	0.00448791	0.0189112
Rapgef6	0.63	1.55	1.31	2.48	0.00480811	0.0199913
Rnf19a	0.63	1.55	0.75	1.69	0.00489686	0.0202433
Dab2	0.63	1.55	0.84	1.8	0.00534108	0.0217895
Kctd10	0.63	1.54	0.94	1.92	0.00653559	0.0258099
Rgl2	0.62	1.54	2.43	5.39	0.00012651	0.000923417
Arl6ip5	0.62	1.54	1.81	3.52	0.0002211	0.00149461
Hsph1	0.62	1.54	2.03	4.09	0.000291578	0.00189841
Csrp2	0.62	1.53	2.2	4.6	0.00093145	0.005099
Ppme1	0.62	1.54	1.55	2.94	0.000959972	0.00523008
Pdha1	0.62	1.54	3.15	8.9	0.00117071	0.00619381
Nbl1	0.62	1.53	1.04	2.05	0.00121613	0.00639452
Mboat7	0.62	1.53	1.02	2.03	0.00184014	0.00905751
Ifnar2	0.62	1.54	1.19	2.29	0.00199543	0.00967082
Mgea5	0.62	1.53	3.05	8.3	0.00202578	0.00979256
Mfap3	0.62	1.54	0.77	1.7	0.00323311	0.0144496
Med13l	0.62	1.53	2.09	4.26	0.00617501	0.0246519
Ywhah	0.62	1.53	0.83	1.78	0.00827309	0.0312505
Cbx6	0.61	1.53	2.05	4.14	0.000165999	0.00116838
Pum1	0.61	1.52	2.14	4.4	0.000177831	0.00123637
Lpcat3	0.61	1.52	2.18	4.54	0.000596582	0.00348165
G6pc3	0.61	1.53	1.67	3.19	0.00061622	0.00358604
Tmem59	0.61	1.53	5.02	32.34	0.00136001	0.00700131
Ndufa3	0.61	1.52	2.26	4.78	0.00159712	0.00801138
Nfat5	0.61	1.52	3.56	11.78	0.00407857	0.01746
Lmbr1l	0.61	1.53	0.6	1.51	0.00641892	0.0254571
Tgoln1	0.61	1.53	3.18	9.04	0.00722979	0.0279905
Krba1	0.61	1.53	0.64	1.56	0.00738481	0.0284724
Gnl3l	0.61	1.53	1.5	2.84	0.00768253	0.0293771
Hsd17b12	0.61	1.52	1.02	2.03	0.00783869	0.0299073
Fbxo21	0.61	1.52	0.79	1.73	0.0117153	0.0410598
Adprh	0.61	1.53	0.85	1.81	0.01307	0.0447364
Smagp	0.61	1.52	0.34	1.26	0.0149252	0.0495155
Sppl2a	0.6	1.52	2.21	4.64	0.000264473	0.00174553
Cxadr	0.6	1.52	2.54	5.82	0.000488	0.00294872
Zmym3	0.6	1.51	1.32	2.49	0.000877438	0.00486053
Acadvl	0.6	1.52	2.99	7.96	0.0012047	0.00635069
Nfkb1	0.6	1.52	1.81	3.52	0.00131276	0.00680481
Cmtm8	0.6	1.52	1.44	2.71	0.0014405	0.00735328
Zcchc7	0.6	1.51	1.29	2.45	0.00159648	0.00801138
Tbc1d14	0.6	1.51	1.32	2.5	0.00262132	0.0120951
Smchd1	0.6	1.51	1.14	2.2	0.00278865	0.012741
Itm2c	0.6	1.52	2.82	7.05	0.00402857	0.0172957
Cish	0.6	1.52	2.14	4.41	0.00446357	0.0188241
Sparcl1	0.6	1.51	2.67	6.36	0.00762272	0.0292093
Scara5	0.6	1.52	1.16	2.24	0.0100882	0.0365574
Taf8	0.6	1.52	0.99	1.99	0.0102122	0.0369151
Mtfp1	0.6	1.52	0.46	1.38	0.0139379	0.0470317
Arpc3	0.59	1.5	2.38	5.2	0.000466218	0.00284902
Dusp16	0.59	1.51	1.7	3.26	0.000641618	0.00371696
Wdr1	0.59	1.51	2.34	5.06	0.000691949	0.0039726
Hcfc1r1	0.59	1.51	2.12	4.35	0.000794607	0.00446934
Trappc12	0.59	1.5	1.49	2.8	0.00117595	0.00621834
Ddr1	0.59	1.51	2.88	7.36	0.0013466	0.0069486
Pkm	0.59	1.51	3.74	13.32	0.00213971	0.0102323
Mterfd2	0.59	1.5	1.16	2.23	0.00246536	0.011526
Fut8	0.59	1.5	3.19	9.1	0.00277523	0.0127023
Nucb1	0.59	1.5	4.83	28.45	0.0028272	0.012877
Dnajc4	0.59	1.51	1.06	2.08	0.00296866	0.013414
Rhoc	0.59	1.5	1.25	2.38	0.0029899	0.0134861
Apoe	0.59	1.51	4.4	21.12	0.00341115	0.0151027
Arrdc3	0.59	1.5	0.97	1.96	0.00463637	0.019417
Arpc4	0.59	1.5	1.24	2.37	0.00573206	0.0231359
Dennd4c	0.59	1.5	1.14	2.21	0.00795364	0.0302333
C2cd3	0.59	1.51	1.4	2.65	0.0094004	0.0344109
Tinf2	0.59	1.51	0.35	1.28	0.0126586	0.0437226
Atp6v1a	0.58	1.49	2.36	5.14	0.000400244	0.00249647
Tmem164	0.58	1.5	2.42	5.36	0.000693834	0.00397897
Tug1	0.58	1.49	2.21	4.63	0.00106572	0.00572503
Rnf149	0.58	1.5	2.71	6.56	0.00138707	0.00711443
Gopc	0.58	1.5	1.22	2.33	0.00168183	0.0083748
Cept1	0.58	1.5	2.18	4.54	0.00200532	0.00970736
Tle3	0.58	1.49	1.72	3.29	0.00208572	0.0100302
Rnf130	0.58	1.5	1.86	3.62	0.00218351	0.0103932
Uqcrb	0.58	1.49	1.39	2.62	0.00230719	0.0108808
Slc9a1	0.58	1.49	1.29	2.45	0.00277946	0.0127103
Skiv2l2	0.58	1.49	1.42	2.68	0.00320221	0.014324
Htt	0.58	1.49	1.78	3.44	0.00450586	0.0189791
Nid1	0.58	1.49	2.84	7.18	0.0134208	0.045587
Ifitm3	0.58	1.49	2.63	6.18	0.0145312	0.048586
Fam135a	0.57	1.48	2.39	5.25	0.000251685	0.00167268
Pygb	0.57	1.48	1.91	3.76	0.000422291	0.00259918
Fam168a	0.57	1.48	2.15	4.44	0.000535331	0.00319143
Arap1	0.57	1.48	2.24	4.73	0.000782417	0.00440803
Fis1	0.57	1.48	2.42	5.35	0.000875941	0.00485486
Ccar1	0.57	1.48	2.25	4.75	0.000914718	0.0050236
Leprot	0.57	1.49	1.44	2.71	0.00108402	0.00578295
Smarca4	0.57	1.49	3.11	8.61	0.00202922	0.00980452
Ddx39b	0.57	1.49	3.7	12.96	0.00270833	0.012435
Ptpn14	0.57	1.49	1.59	3.02	0.0059681	0.0239284
Hsp90ab1	0.57	1.49	5.49	45	0.0071671	0.0278003
Ap5z1	0.57	1.48	0.6	1.51	0.00911332	0.0335344
F11r	0.56	1.48	2.56	5.9	0.000404879	0.00251467
Kdm3b	0.56	1.48	2.41	5.33	0.000781321	0.00440428
Tjp1	0.56	1.47	2.7	6.48	0.000834156	0.00465601
Vps53	0.56	1.47	1.66	3.16	0.000932401	0.005099
Ezr	0.56	1.48	2.39	5.24	0.0010812	0.00577393
Taf1	0.56	1.48	1.85	3.61	0.0011045	0.00587688
Dpp8	0.56	1.48	2.87	7.31	0.00194399	0.00947314
Adcy6	0.56	1.48	4.63	24.7	0.00251107	0.0116864
Gdi1	0.56	1.47	3.03	8.16	0.00272968	0.0125162
Akr1a1	0.56	1.48	4.93	30.46	0.00294178	0.0133101
Calr	0.56	1.47	5.54	46.53	0.00406805	0.017436
Sptan1	0.56	1.47	3.58	11.98	0.00411243	0.017582
Cdc23	0.56	1.47	1.13	2.19	0.00459148	0.0192763
Ntn4	0.56	1.47	0.97	1.95	0.00745678	0.0287066
Zscan21	0.56	1.47	0.65	1.57	0.0100071	0.036289
Dalrd3	0.55	1.46	2.35	5.11	0.000595343	0.00347815
Bcap31	0.55	1.46	2.45	5.46	0.000854554	0.0047466
Arpc1b	0.55	1.47	2.16	4.48	0.00100951	0.00546509
Add1	0.55	1.47	2.56	5.88	0.00114014	0.00604768
Stxbp2	0.55	1.46	3.63	12.34	0.00458963	0.0192763
Arrdc1	0.55	1.46	1.16	2.24	0.00469976	0.0196104
Mal2	0.55	1.47	1.58	3	0.00842366	0.0317024
Hsp90aa1	0.55	1.46	1.12	2.18	0.00866333	0.032414
Nhsl1	0.55	1.47	1.35	2.54	0.00880908	0.0327104
Myl12a	0.54	1.45	2.12	4.36	0.000984547	0.00534126
Mrpl24	0.54	1.46	1.81	3.51	0.00148962	0.0075535
Tor4a	0.54	1.45	1.46	2.75	0.00178738	0.008836
Stx17	0.54	1.45	1.51	2.85	0.00249377	0.0116298
Ociad1	0.54	1.45	3.55	11.72	0.00352926	0.0155027
Gon4l	0.54	1.45	1.26	2.4	0.00376035	0.0163566
Brd9	0.54	1.46	1.01	2.02	0.0049473	0.0204024
Slc38a9	0.54	1.45	1.23	2.35	0.00507833	0.0208505
Gstk1	0.54	1.46	1.77	3.4	0.00854187	0.0320455
Acbd4	0.54	1.45	0.68	1.6	0.0110796	0.0393703
Raph1	0.54	1.45	1.46	2.75	0.0115545	0.0406349
Brd8	0.53	1.44	2.08	4.23	0.00118437	0.00625642
Man2c1	0.53	1.44	2.67	6.35	0.00126883	0.00662545
Thra	0.53	1.44	2.06	4.18	0.00177171	0.00877124
Tmem135	0.53	1.44	2.59	6.04	0.00212127	0.0101773
Agtrap	0.53	1.44	1.58	3	0.00279703	0.0127736
Ints1	0.53	1.44	2.25	4.77	0.00351951	0.0154665
Fundc2	0.53	1.45	1.17	2.24	0.00417743	0.0178079
Ubap2	0.53	1.45	2.67	6.37	0.00468774	0.0195842
Cpt1a	0.53	1.45	3.12	8.72	0.00702502	0.0273606
Tmco3	0.53	1.45	1.62	3.07	0.00708234	0.0275264
Drosha	0.53	1.44	1.05	2.07	0.0101325	0.0367048
Bub3	0.53	1.44	1.3	2.46	0.0111613	0.0395237
Ndufc2	0.52	1.44	1.93	3.81	0.00148615	0.00753965
Tmem50a	0.52	1.44	2.13	4.37	0.00152364	0.00770695
St14	0.52	1.43	2.55	5.85	0.00189202	0.00926834
Dus3l	0.52	1.44	2.12	4.34	0.00191557	0.00936134
Clmn	0.52	1.44	2.73	6.63	0.00192852	0.00941566
Cgn	0.52	1.43	1.83	3.56	0.00199588	0.00967082
Ccdc117	0.52	1.44	1.74	3.34	0.00232396	0.0109499
Sptlc1	0.52	1.43	1.55	2.93	0.00255429	0.0118285
Tecr	0.52	1.44	2.74	6.66	0.00328337	0.0146205
Ppip5k1	0.52	1.44	1.51	2.84	0.00418454	0.0178308
Hmox2	0.52	1.43	1.08	2.12	0.00472947	0.0197189
Higd2a	0.52	1.43	2.27	4.82	0.00517879	0.021195
Aldh1a1	0.52	1.43	3.19	9.14	0.00639901	0.0253879
Mllt3	0.52	1.44	1.33	2.51	0.00656448	0.0258741
Usp10	0.52	1.43	3.04	8.23	0.00671567	0.0263586
Pagr1a	0.52	1.43	0.98	1.98	0.00881047	0.0327104
0610037L13Rik	0.52	1.44	0.93	1.9	0.00905179	0.0333439
Topbp1	0.52	1.44	0.93	1.9	0.0122242	0.0425168
Csk	0.52	1.44	1.54	2.91	0.0123759	0.0429488
Ppt1	0.52	1.44	2.8	6.96	0.0140893	0.0473711
Pcnt	0.52	1.43	0.82	1.77	0.0148725	0.0494046
Smg6	0.51	1.42	2.66	6.32	0.00195706	0.00951461
Vps28	0.51	1.42	2.17	4.5	0.00241461	0.0113197
Scarb2	0.51	1.42	2.17	4.51	0.00277029	0.0126911
Inpp5k	0.51	1.43	1.81	3.51	0.00341756	0.0151157
Psma1	0.51	1.42	2.02	4.04	0.00392434	0.0169262
Zfp266	0.51	1.42	1.72	3.28	0.00456432	0.0191937
Atrx	0.51	1.43	2.75	6.72	0.00549692	0.0223453
Stag2	0.51	1.43	2.98	7.87	0.00612974	0.0244915
BC005537	0.51	1.43	3.17	9.02	0.00618319	0.024675
Sox13	0.51	1.42	1.66	3.16	0.00650141	0.0257422
Pik3r4	0.51	1.43	1.69	3.23	0.00655882	0.0258717
Sqrdl	0.51	1.42	1.79	3.45	0.00720472	0.0279251
Abcb8	0.51	1.42	1.13	2.19	0.00874422	0.0326095
Taok3	0.51	1.43	1.68	3.2	0.00887115	0.0328556
Mpst	0.51	1.43	1.59	3.02	0.00938416	0.0343992
Erlec1	0.51	1.42	3.19	9.13	0.010203	0.036895
Nt5c2	0.51	1.43	1.07	2.1	0.0108688	0.038823
Gltscr2	0.51	1.42	3.14	8.8	0.0125444	0.0434308
Cd34	0.51	1.42	2.04	4.13	0.0139998	0.0471166
Ocln	0.5	1.41	2.06	4.18	0.00156794	0.00788432
Fnbp1l	0.5	1.42	2.13	4.38	0.00217862	0.0103751
Acadm	0.5	1.41	1.82	3.54	0.0023877	0.0112192
Igbp1	0.5	1.41	2.18	4.53	0.00441417	0.0186619
Cldn7	0.5	1.41	1.83	3.55	0.00623118	0.0248085
Ndufa7	0.5	1.42	1.95	3.87	0.00634172	0.0251997
Creb3l1	0.5	1.42	3.55	11.72	0.00708306	0.0275264
Mbd1	0.5	1.41	1.87	3.65	0.00872061	0.0325451
Klf6	0.5	1.41	1.38	2.61	0.0124489	0.0431583
Atp6v0e	0.49	1.41	2.11	4.31	0.00185153	0.00909174
Lta4h	0.49	1.41	2.07	4.21	0.00205644	0.00990802
Calm2	0.49	1.41	2.09	4.26	0.00345062	0.0152222
Galnt7	0.49	1.4	2.24	4.71	0.0041597	0.0177619
Prdx2	0.49	1.41	2.28	4.85	0.00503951	0.020716
2310067B10Rik	0.49	1.41	2.04	4.12	0.00504617	0.020735
Aldh16a1	0.49	1.41	1.52	2.86	0.00505337	0.0207563
Abca1	0.49	1.41	2.18	4.53	0.00551807	0.0224144
Lgr4	0.49	1.41	2.64	6.23	0.00566173	0.0229334
Ddr2	0.49	1.4	1.32	2.5	0.00587948	0.0236471
Bag6	0.49	1.41	3.52	11.47	0.006488	0.0257211
Hectd1	0.49	1.41	3.57	11.87	0.0070297	0.0273606
Gpcpd1	0.49	1.4	1.41	2.65	0.00798831	0.0303313
Ddx5	0.49	1.4	5.41	42.42	0.00824805	0.0311674
Trafd1	0.49	1.41	1.37	2.58	0.00833425	0.0314468
Bsdc1	0.49	1.4	3.01	8.04	0.00839613	0.031622
Hnrnpm	0.49	1.4	3.44	10.83	0.00845274	0.0317769
Eml4	0.49	1.41	1.13	2.19	0.010391	0.0374427
Cnn3	0.49	1.41	1.43	2.7	0.0109741	0.0391174
Ppap2c	0.49	1.4	1.33	2.51	0.0114151	0.0402704
Exoc4	0.49	1.41	1.56	2.96	0.0118952	0.0415623
2310011J03Rik	0.49	1.4	0.86	1.81	0.0129529	0.0444547
Gnai2	0.49	1.4	3.21	9.23	0.0148031	0.049238
Hprt	0.48	1.39	1.87	3.65	0.00332851	0.0147857
Erlin2	0.48	1.39	2.14	4.4	0.00342493	0.0151366
Zkscan3	0.48	1.39	1.56	2.95	0.00384675	0.0166617
Dnajc10	0.48	1.39	2.36	5.15	0.00423695	0.0180242
Anapc1	0.48	1.39	2.49	5.62	0.0045793	0.0192409
Spr	0.48	1.39	1.93	3.8	0.00560943	0.0227395
Cyp2j6	0.48	1.39	1.81	3.5	0.00567667	0.0229666
Znf512b	0.48	1.4	1.91	3.77	0.00731564	0.0282695
Cltc	0.48	1.4	4.21	18.53	0.00847135	0.0318351
Cyth3	0.48	1.39	1.94	3.84	0.00862531	0.0323071
Trip12	0.48	1.4	3.25	9.51	0.00981233	0.0356837
Psmb4	0.48	1.4	3.01	8.07	0.0106567	0.0382253
Meis1	0.48	1.39	1.16	2.24	0.0114864	0.0404651
Flad1	0.48	1.4	0.95	1.93	0.0148347	0.0493272
Smc1a	0.47	1.39	2.53	5.77	0.00228197	0.0107867
Phkb	0.47	1.39	2.19	4.56	0.00326594	0.0145582
Gaa	0.47	1.38	2.46	5.52	0.00636102	0.0252568
Kdm5a	0.47	1.39	1.67	3.18	0.00722693	0.02799
Flii	0.47	1.39	2.67	6.34	0.00886433	0.0328465
Sdc4	0.47	1.39	2.99	7.93	0.00924637	0.0339752
Gstt3	0.47	1.39	2.85	7.21	0.00942405	0.0344674
Abca3	0.47	1.39	3.54	11.6	0.00999036	0.0362411
Serinc5	0.47	1.39	1.48	2.8	0.0111393	0.0394729
Vipas39	0.47	1.39	1.46	2.76	0.0122265	0.0425168
Pgrmc1	0.47	1.38	2.96	7.8	0.0133217	0.045386
Usp3	0.47	1.39	1.38	2.6	0.013951	0.0470478
Usp40	0.47	1.39	1.23	2.34	0.0139821	0.0471035
Sort1	0.47	1.39	3.93	15.26	0.0149611	0.0496026
Pcmtd2	0.46	1.38	2.55	5.84	0.00624463	0.0248428
Psmc5	0.46	1.38	2.54	5.81	0.00685172	0.0268207
Zfp523	0.46	1.37	1.66	3.17	0.00689089	0.0269241
Gigyf1	0.46	1.37	2.59	6.03	0.00702444	0.0273606
Man2a2	0.46	1.38	1.86	3.64	0.00751733	0.028918
Ptprg	0.46	1.38	1.22	2.33	0.0110299	0.0392419
Arpc2	0.46	1.37	2.98	7.91	0.0110305	0.0392419
Aak1	0.46	1.38	3.07	8.38	0.0118011	0.0413181
Srsf3	0.45	1.37	1.97	3.9	0.00453903	0.019103
Mkln1	0.45	1.37	2.15	4.43	0.00467575	0.0195437
Prkcd	0.45	1.37	1.99	3.98	0.00871222	0.0325381
Pdlim5	0.45	1.36	2.08	4.22	0.0112291	0.0397223
Pbx3	0.45	1.36	1.84	3.58	0.0118717	0.0415085
Eif4g3	0.45	1.37	2.87	7.31	0.0121797	0.0423873
Slc27a1	0.45	1.37	2.95	7.71	0.0128006	0.0440943
Trp53bp1	0.45	1.37	1.62	3.06	0.0130624	0.0447358
Nisch	0.45	1.37	4.23	18.81	0.0131127	0.0448529
Sbf2	0.44	1.35	1.91	3.76	0.00793387	0.0302029
Atp9b	0.44	1.35	1.72	3.29	0.00936935	0.0343778
Zfr	0.44	1.36	2.58	5.97	0.00950943	0.0347301
Ino80d	0.44	1.36	1.78	3.44	0.0100144	0.0363025
Chordc1	0.44	1.36	1.63	3.09	0.0121448	0.0423332
Mib2	0.44	1.36	1.75	3.36	0.0132153	0.0450985
Glo1	0.44	1.35	2.49	5.61	0.0134906	0.045809
Dnmbp	0.44	1.35	1.6	3.04	0.0137807	0.0466548
Magi1	0.43	1.35	2.32	4.98	0.00595266	0.0238759
Gba	0.43	1.35	2.2	4.59	0.00688532	0.0269213
Cbx7	0.43	1.34	1.92	3.78	0.0087756	0.032667
Gpr107	0.42	1.34	2.22	4.67	0.00606304	0.0242711
Prpf6	0.42	1.34	2.33	5.02	0.00756024	0.0290504
Ik	0.42	1.34	2.56	5.88	0.00948153	0.0346529
Mapkapk2	0.42	1.34	2.43	5.37	0.0107144	0.0384101
Skp1a	0.42	1.33	2.25	4.76	0.0107194	0.0384101
Fcho2	0.42	1.34	2.2	4.6	0.0111804	0.0395775
Gtf3c1	0.42	1.33	2.66	6.31	0.0121742	0.0423873
Farsb	0.41	1.33	2.3	4.93	0.0107176	0.0384101
Mapre1	0.41	1.33	2.06	4.16	0.0108882	0.0388519
Akap8l	0.41	1.33	2.62	6.14	0.0113841	0.0402292
Ints4	0.41	1.32	1.93	3.82	0.0121318	0.0423023
Pef1	0.4	1.32	1.79	3.45	0.0129504	0.0444547
Ptk2	0.4	1.32	2.2	4.6	0.0137709	0.0466382
2610301G19Rik	0.4	1.32	2.15	4.43	0.0139237	0.0470079
Zfml	0.4	1.32	1.99	3.98	0.0148919	0.0494369
Plod3	0.4	1.32	2.27	4.83	0.0149778	0.0496259
Ubn2	0.39	1.31	2.5	5.67	0.0139937	0.0471116
Cd2ap	0.39	1.31	2.59	6.01	0.0147155	0.0490104
Slc9a3r1	0.38	1.3	2.29	4.9	0.0122507	0.0425722
Arih2	-0.37	0.77	2.15	4.42	0.0126775	0.0437556
Arhgap1	-0.38	0.77	2.33	5.03	0.0125561	0.0434459
Abhd13	-0.39	0.76	2.34	5.07	0.0108123	0.0386617
Ubxn2a	-0.39	0.76	2.18	4.54	0.0115182	0.0405211
Eif1ax	-0.39	0.76	1.92	3.78	0.0133533	0.0454786
Tmem134	-0.39	0.76	2.26	4.79	0.0137712	0.0466382
Pofut2	-0.39	0.76	2.16	4.46	0.0147151	0.0490104
Mrpl28	-0.39	0.76	2.09	4.25	0.0149064	0.0494691
Cc2d1b	-0.4	0.76	2.4	5.29	0.00880669	0.0327104
Tmem109	-0.4	0.76	2.49	5.6	0.0103473	0.0373245
Cox5a	-0.4	0.76	2.49	5.62	0.0133724	0.0455265
Golga1	-0.4	0.76	2.6	6.07	0.014236	0.0477704
Syncrip	-0.4	0.76	2.55	5.85	0.0146052	0.0487379
Las1l	-0.41	0.75	2.12	4.34	0.0102744	0.0370877
Ppp2r5a	-0.41	0.75	1.95	3.86	0.0109376	0.0390144
Oxr1	-0.41	0.75	2.64	6.23	0.0110964	0.0394045
Urgcp	-0.41	0.75	1.8	3.49	0.0113349	0.0400829
Ccdc127	-0.41	0.75	2.37	5.18	0.0114442	0.0403435
Mrps7	-0.41	0.75	2.16	4.47	0.0138155	0.0467085
Mlycd	-0.41	0.75	2.27	4.81	0.0144496	0.0483761
Mbtd1	-0.41	0.75	1.55	2.93	0.0148446	0.0493439
Brd1	-0.42	0.75	2.45	5.45	0.00592533	0.0237942
Tmem183a	-0.42	0.75	2.67	6.37	0.00624147	0.0248398
Farsa	-0.42	0.75	2.18	4.54	0.00686296	0.0268544
Mettl9	-0.42	0.75	2.58	5.98	0.00721224	0.0279437
Snx18	-0.42	0.75	2.45	5.48	0.008771	0.032667
Polg	-0.42	0.75	2.18	4.53	0.00878911	0.0327054
Naca	-0.42	0.75	2.14	4.41	0.0106549	0.0382253
Mrpl53	-0.42	0.75	1.7	3.25	0.0116036	0.0407608
Pes1	-0.42	0.75	1.46	2.75	0.0118624	0.0414899
Pdcl	-0.42	0.75	1.68	3.21	0.012181	0.0423873
Naa50	-0.42	0.75	2.7	6.49	0.0127915	0.0440776
Senp2	-0.43	0.74	2.23	4.69	0.00432801	0.0183506
Pacs2	-0.43	0.74	2.31	4.96	0.0070527	0.0274396
Rapgef1	-0.43	0.74	2.62	6.14	0.00868347	0.0324538
Pgs1	-0.43	0.74	1.47	2.77	0.0104406	0.0375686
Rp9	-0.43	0.74	2.05	4.13	0.0111067	0.039412
Slc25a38	-0.43	0.74	1.25	2.37	0.0126809	0.0437556
Ppp1r9b	-0.43	0.74	2.62	6.16	0.0130654	0.0447358
Rfk	-0.43	0.74	2.95	7.75	0.0140234	0.0471807
BC003965	-0.43	0.74	1.3	2.47	0.0148897	0.0494369
Zscan29	-0.44	0.74	1.87	3.65	0.00463124	0.0194035
Hibch	-0.44	0.74	2.19	4.55	0.00578363	0.0233257
Narf	-0.44	0.74	1.73	3.31	0.00622816	0.0248061
Rps15a	-0.44	0.74	2.26	4.81	0.00657241	0.0258942
Crebzf	-0.44	0.74	2.62	6.14	0.00833232	0.0314468
Svil	-0.44	0.74	1.98	3.94	0.00853519	0.0320455
Ippk	-0.44	0.74	1.84	3.58	0.00855042	0.0320617
Tm2d3	-0.44	0.74	1.94	3.83	0.00939837	0.0344109
Tmc6	-0.44	0.74	2	4	0.0106026	0.0380845
Rrn3	-0.44	0.74	1.66	3.16	0.0108407	0.0387361
Tmem104	-0.44	0.74	1.44	2.7	0.0121768	0.0423873
Tmem70	-0.44	0.74	1.51	2.85	0.0123983	0.0430121
S100a16	-0.44	0.73	2.27	4.84	0.0131021	0.0448314
Blcap	-0.44	0.74	1.04	2.05	0.0134192	0.045587
Tsc22d1	-0.44	0.74	3.07	8.4	0.0139198	0.0470079
Ndst1	-0.44	0.74	3.07	8.39	0.0143688	0.0481687
E130309D02Rik	-0.44	0.73	1.06	2.08	0.0143818	0.0481963
Parp1	-0.44	0.74	2.67	6.35	0.0144431	0.0483702
Tmem39a	-0.45	0.73	2.47	5.56	0.00389459	0.0168404
Bicd2	-0.45	0.73	1.62	3.07	0.00659903	0.0259505
Timm44	-0.45	0.73	1.88	3.69	0.00668714	0.0262566
Pitrm1	-0.45	0.73	1.92	3.79	0.00837425	0.0315628
Zfp777	-0.45	0.73	1.55	2.93	0.00880205	0.0327104
Papd5	-0.45	0.73	1.52	2.88	0.0114126	0.0402704
Rab10	-0.45	0.73	3.24	9.44	0.0118446	0.041456
Ttc1	-0.45	0.73	1.22	2.32	0.0134049	0.0455783
Acvr2a	-0.45	0.73	1.69	3.23	0.0138193	0.0467085
Lzts3	-0.45	0.73	2.78	6.87	0.0139869	0.047104
Mrpl17	-0.45	0.73	2.36	5.14	0.0141623	0.0475854
Abhd5	-0.45	0.73	1.32	2.5	0.0145881	0.0487234
Atxn2	-0.46	0.73	1.98	3.94	0.00394926	0.0170122
Spdef	-0.46	0.73	2.17	4.51	0.00415158	0.0177346
Tbc1d20	-0.46	0.72	2.09	4.25	0.00486692	0.0201601
Dnajc11	-0.46	0.73	2.01	4.02	0.00495986	0.0204459
Fyttd1	-0.46	0.73	2	4	0.00569724	0.0230301
Narfl	-0.46	0.73	1.39	2.62	0.00964992	0.035193
Amfr	-0.46	0.73	3.71	13.08	0.010884	0.0388519
Smad2	-0.46	0.73	1.45	2.73	0.0113782	0.0402219
Mob3c	-0.46	0.73	1.16	2.23	0.0120715	0.0421209
Coq9	-0.46	0.73	3.05	8.25	0.0122347	0.0425308
Emp2	-0.46	0.73	1.44	2.71	0.0125573	0.0434459
Ppp2r5d	-0.46	0.73	2.2	4.59	0.0146933	0.048968
Rragc	-0.47	0.72	2.41	5.31	0.00201854	0.00976676
Fam160b1	-0.47	0.72	2.59	6.02	0.00204941	0.00988347
Gorasp1	-0.47	0.72	2.03	4.09	0.00250186	0.0116541
Ltbr	-0.47	0.72	2.47	5.54	0.0025859	0.0119424
Chchd3	-0.47	0.72	2.55	5.87	0.00372091	0.016209
Slc25a46	-0.47	0.72	2.23	4.69	0.00466967	0.0195326
Fam65a	-0.47	0.72	2.03	4.08	0.00501404	0.0206195
Zbtb4	-0.47	0.72	2.62	6.13	0.00510056	0.020925
Necap1	-0.47	0.72	2.76	6.79	0.00568491	0.0229909
Elof1	-0.47	0.72	2	4.01	0.00586922	0.0236244
Gltp	-0.47	0.72	2.35	5.1	0.00589828	0.0237135
Kif16b	-0.47	0.72	2.06	4.17	0.00607085	0.0242929
Ggnbp2	-0.47	0.72	2.78	6.86	0.00658142	0.025911
Snapc4	-0.47	0.72	1.76	3.4	0.00673501	0.0264142
Lats1	-0.47	0.72	3.11	8.63	0.0076487	0.0292881
Cisd1	-0.47	0.72	1.66	3.16	0.00938861	0.0343992
Six5	-0.47	0.72	1.48	2.78	0.0102322	0.0369711
Srf	-0.47	0.72	1.77	3.4	0.0108093	0.0386617
Ttpal	-0.47	0.72	1.28	2.44	0.0110437	0.0392699
Fig4	-0.47	0.72	1.63	3.09	0.0114084	0.0402704
Ssr3	-0.47	0.72	5.13	35.07	0.0114154	0.0402704
Tysnd1	-0.47	0.72	1.69	3.23	0.0121668	0.0423873
Tsc22d2	-0.47	0.72	1.34	2.54	0.0123753	0.0429488
Spryd3	-0.48	0.72	2.06	4.18	0.0019008	0.00930693
Prelid1	-0.48	0.72	2.39	5.23	0.00322674	0.0144274
Tpcn1	-0.48	0.72	2.21	4.64	0.00467615	0.0195437
Ssx2ip	-0.48	0.72	2.59	6.02	0.00476342	0.0198437
Abcb10	-0.48	0.72	1.51	2.84	0.00490279	0.0202596
Midn	-0.48	0.72	2.19	4.56	0.00498296	0.0205082
Hsdl1	-0.48	0.72	1.27	2.42	0.00535763	0.0218484
Srp19	-0.48	0.72	2.11	4.31	0.00611675	0.0244574
Lmo4	-0.48	0.72	1.71	3.28	0.00619775	0.0247138
Zbtb41	-0.48	0.72	1.28	2.43	0.00626919	0.0249308
1810019J16Rik	-0.48	0.72	1.56	2.95	0.00676978	0.0265404
Ptbp1	-0.48	0.72	3.28	9.69	0.00707053	0.0274986
Flnb	-0.48	0.72	3.47	11.07	0.00734612	0.0283659
Mex3c	-0.48	0.72	1.78	3.43	0.00758378	0.029119
Mapk9	-0.48	0.72	3.04	8.22	0.00768224	0.0293771
Setd1b	-0.48	0.72	2.7	6.52	0.00770469	0.0294411
Zfyve21	-0.48	0.72	1.82	3.52	0.00935088	0.0343223
Repin1	-0.48	0.72	1.09	2.13	0.00982487	0.0357167
Pclo	-0.48	0.72	1.24	2.37	0.00995012	0.0361335
Edc4	-0.48	0.72	2.87	7.31	0.00996023	0.0361446
Map4k5	-0.48	0.72	1.07	2.1	0.0117594	0.041186
Heatr3	-0.48	0.72	1.71	3.27	0.0138038	0.0466947
5-Mar	-0.49	0.71	2.56	5.91	0.00140581	0.00719975
Aagab	-0.49	0.71	2.43	5.38	0.00208388	0.0100299
Cpox	-0.49	0.71	2.19	4.57	0.00222708	0.0105565
Arhgef16	-0.49	0.71	2.55	5.87	0.00239035	0.0112265
Lrrc8d	-0.49	0.71	2.01	4.02	0.00248534	0.0116035
Rfng	-0.49	0.71	2.2	4.6	0.0032928	0.0146461
Gatad1	-0.49	0.71	2.36	5.13	0.00407876	0.01746
Hs6st1	-0.49	0.71	1.99	3.98	0.00416435	0.0177744
Ric8	-0.49	0.71	2.33	5.04	0.00417538	0.0178079
Pop5	-0.49	0.71	1.54	2.9	0.00428115	0.0181838
no_feature	-0.49	0.71	13.65	12897.4	0.00649858	0.0257422
Elmo2	-0.49	0.71	1.54	2.91	0.00871438	0.0325381
Alg11	-0.49	0.71	1.82	3.53	0.00871556	0.0325381
Ankrd24	-0.49	0.71	3.3	9.85	0.009108	0.0335269
Sfmbt1	-0.49	0.71	1.03	2.05	0.00919942	0.0338148
Zfp106	-0.49	0.71	4.05	16.59	0.00941732	0.0344551
Denr	-0.49	0.71	1.88	3.68	0.00984567	0.0357796
Arl3	-0.49	0.71	1.99	3.99	0.0103754	0.037409
Cd82	-0.49	0.71	3.26	9.59	0.0122805	0.0426612
Sh3pxd2a	-0.49	0.71	3.01	8.05	0.0127846	0.0440686
Prmt7	-0.49	0.71	1.31	2.48	0.0133869	0.0455476
Tmem120a	-0.49	0.71	1.23	2.35	0.0140303	0.0471881
Prkaca	-0.5	0.71	2.57	5.96	0.00120117	0.00633581
A230046K03Rik	-0.5	0.71	2.08	4.22	0.00145851	0.00742145
Hspd1	-0.5	0.71	1.77	3.4	0.00213759	0.0102269
Nabp2	-0.5	0.71	1.9	3.73	0.00219697	0.0104476
Rptor	-0.5	0.71	2.09	4.26	0.00246434	0.011526
Plcl2	-0.5	0.71	2.04	4.12	0.00248713	0.0116066
Aldh4a1	-0.5	0.7	2.26	4.79	0.00289636	0.0131569
Pptc7	-0.5	0.71	1.68	3.2	0.00292944	0.0132718
Fam117b	-0.5	0.71	1.25	2.38	0.0042557	0.0180889
Insr	-0.5	0.71	3.34	10.16	0.00478926	0.0199351
Ephb4	-0.5	0.71	1.82	3.54	0.0052101	0.0213061
Gbas	-0.5	0.7	3.06	8.35	0.00544764	0.0221713
Zfp787	-0.5	0.71	1.25	2.38	0.00548397	0.0223015
Wsb1	-0.5	0.71	1.44	2.72	0.00573736	0.0231482
Grpel2	-0.5	0.71	1.73	3.33	0.0058159	0.0234374
Ankrd12	-0.5	0.71	1.67	3.19	0.00619628	0.0247138
Kars	-0.5	0.71	3.22	9.33	0.00800342	0.0303774
Ubp1	-0.5	0.71	3.05	8.29	0.00821419	0.0310623
Adsl	-0.5	0.71	1.44	2.7	0.0101637	0.0367918
Ccz1	-0.5	0.71	2.22	4.65	0.0101723	0.0368098
Gda	-0.5	0.71	1.8	3.48	0.0107817	0.0385927
Galnt1	-0.5	0.71	3	8	0.0114247	0.0402891
Spast	-0.5	0.71	1.66	3.16	0.0120694	0.0421209
Plec	-0.5	0.71	3.28	9.73	0.0125058	0.043341
Eif2b5	-0.5	0.71	2.84	7.16	0.0130479	0.0447058
Asf1a	-0.5	0.71	0.78	1.71	0.0132922	0.0453155
Lbr	-0.5	0.71	1.17	2.25	0.0135587	0.0459944
Dusp7	-0.5	0.71	0.78	1.71	0.0143281	0.0480478
Mkrn2	-0.5	0.71	0.76	1.7	0.0147835	0.0491887
Suz12	-0.51	0.7	1.94	3.85	0.00128208	0.00668095
Pogk	-0.51	0.7	1.92	3.79	0.00138247	0.00709798
Zcchc14	-0.51	0.7	2.59	6.04	0.0015455	0.00778677
Kpna1	-0.51	0.7	2.14	4.41	0.00165588	0.0082697
Tceb3	-0.51	0.7	2.64	6.22	0.00169677	0.00843284
Ube2k	-0.51	0.7	2.31	4.94	0.00194201	0.00946797
2310008H09Rik	-0.51	0.7	2.72	6.6	0.00246979	0.0115391
Fbxw8	-0.51	0.7	2.77	6.83	0.00361818	0.0158187
Qser1	-0.51	0.7	2.29	4.88	0.00393685	0.016973
Dhx33	-0.51	0.7	1.59	3.02	0.00402215	0.0172788
Rnf185	-0.51	0.7	2.65	6.27	0.0048086	0.0199913
Eif4g1	-0.51	0.7	5.64	49.72	0.00514479	0.0210811
Eif3a	-0.51	0.7	4.9	29.81	0.00693918	0.0270891
Slc38a2	-0.51	0.7	4.66	25.23	0.00750685	0.0288885
Vhl	-0.51	0.7	0.92	1.89	0.0080784	0.030628
Rpl23	-0.51	0.7	2.65	6.29	0.00836995	0.0315582
Coq2	-0.51	0.7	1.45	2.73	0.00938529	0.0343992
Cct5	-0.51	0.7	4.22	18.65	0.010378	0.037409
Manba	-0.51	0.7	1.06	2.08	0.0111492	0.0394944
Tbc1d15	-0.51	0.7	2.81	7.02	0.0126094	0.043582
Dctpp1	-0.51	0.7	1.15	2.22	0.013415	0.045587
Tbc1d4	-0.51	0.7	1.69	3.23	0.0137035	0.0464395
Vps9d1	-0.51	0.7	0.92	1.9	0.014394	0.0482214
Mif4gd	-0.52	0.7	2.34	5.08	0.0014771	0.00750116
Adam10	-0.52	0.7	2.59	6	0.00153151	0.00773912
Cox7a2	-0.52	0.69	2.52	5.73	0.0016763	0.00835541
1110008P14Rik	-0.52	0.7	1.49	2.82	0.00182233	0.0089785
Max	-0.52	0.7	1.84	3.57	0.0020486	0.00988347
Sh3bgrl2	-0.52	0.7	1.39	2.62	0.00228613	0.0107914
Ola1	-0.52	0.7	1.59	3.02	0.00251532	0.0117009
Surf6	-0.52	0.7	1.47	2.77	0.00272249	0.0124889
Smoc1	-0.52	0.7	1.42	2.67	0.00382599	0.0165928
Clip1	-0.52	0.7	2.9	7.45	0.00422278	0.0179863
Srpr	-0.52	0.7	5.01	32.18	0.00553815	0.0224772
Asnsd1	-0.52	0.69	3.09	8.5	0.00663113	0.0260667
Tmem66	-0.52	0.7	4.45	21.81	0.00689128	0.0269241
Timm17b	-0.52	0.7	1.78	3.44	0.00694146	0.0270891
Rwdd4a	-0.52	0.7	1.34	2.53	0.00980772	0.0356796
Mgat4a	-0.52	0.7	3.04	8.2	0.0103998	0.0374612
Adpgk	-0.52	0.7	2.09	4.24	0.0115006	0.0405011
Ptprm	-0.52	0.7	0.99	1.98	0.0118807	0.0415258
Jtb	-0.52	0.7	3.15	8.85	0.0130115	0.0445958
Heyl	-0.52	0.7	0.66	1.58	0.0131895	0.0450555
Mgat2	-0.52	0.7	3.32	10.01	0.0132114	0.0450985
Efhd2	-0.53	0.69	2.55	5.84	0.000478554	0.00290361
Egln1	-0.53	0.69	2.36	5.12	0.000559766	0.00330442
Tesk1	-0.53	0.69	1.96	3.9	0.00107377	0.00574024
Ccnd3	-0.53	0.69	2.07	4.2	0.00109244	0.00581877
Rassf3	-0.53	0.69	2.63	6.19	0.00137618	0.00707277
Rufy1	-0.53	0.69	2.14	4.41	0.00144133	0.00735328
Mid1ip1	-0.53	0.69	2.28	4.87	0.00166623	0.00831332
Rbm18	-0.53	0.69	1.68	3.21	0.00222405	0.010547
Rnf139	-0.53	0.69	1.57	2.98	0.00333742	0.0148188
Tmem115	-0.53	0.69	2.05	4.15	0.00357142	0.0156544
Grina	-0.53	0.69	3.15	8.86	0.00384369	0.0166554
Bag5	-0.53	0.69	1.59	3.01	0.00410955	0.0175771
1200014J11Rik	-0.53	0.69	1.09	2.12	0.00430081	0.018258
Dhx29	-0.53	0.69	1.16	2.23	0.00446834	0.0188365
Gtf3c4	-0.53	0.69	1.58	2.99	0.00481544	0.0200116
Ints5	-0.53	0.69	1.31	2.48	0.00490636	0.0202662
Clic4	-0.53	0.69	3.43	10.77	0.00594935	0.0238719
Slc12a8	-0.53	0.69	2.19	4.56	0.00733558	0.0283358
0610012G03Rik	-0.53	0.69	1.2	2.3	0.00736456	0.0284157
Fbxl14	-0.53	0.69	1.48	2.8	0.00797851	0.0303166
Cpn1	-0.53	0.69	3.43	10.75	0.00854261	0.0320455
Esf1	-0.53	0.69	1.04	2.05	0.00883591	0.0327725
Camk1	-0.53	0.69	1.82	3.53	0.00995761	0.0361446
Pawr	-0.53	0.69	1.19	2.28	0.0104316	0.0375494
Gmip	-0.53	0.69	1.05	2.07	0.0123159	0.0427697
Mettl1	-0.53	0.69	1.21	2.31	0.0144821	0.0484534
Ank	-0.54	0.69	1.87	3.66	0.000589049	0.00345144
Ankrd13a	-0.54	0.69	2.7	6.49	0.000870214	0.00482834
Nudt3	-0.54	0.69	2.45	5.46	0.0012442	0.00651871
Emc6	-0.54	0.69	2.12	4.35	0.00165684	0.00827046
Rps16	-0.54	0.69	1.36	2.57	0.00168622	0.00838855
Iqsec2	-0.54	0.69	1.55	2.93	0.00170529	0.00846698
Setd8	-0.54	0.69	2.67	6.38	0.00196543	0.00955035
Ifngr2	-0.54	0.69	1.11	2.15	0.00243732	0.0114105
Lgals12	-0.54	0.69	1.73	3.32	0.00257267	0.0119028
15-Sep	-0.54	0.69	4.81	27.98	0.00290745	0.0131956
Lrrc47	-0.54	0.69	1.79	3.46	0.00291207	0.0132107
Tbc1d16	-0.54	0.69	3.44	10.88	0.00331393	0.0147337
2700089E24Rik	-0.54	0.69	2.85	7.22	0.00345204	0.0152222
Ecsit	-0.54	0.69	1.39	2.62	0.00441738	0.0186678
Rexo2	-0.54	0.69	3.13	8.78	0.00479969	0.0199705
Ubqln4	-0.54	0.69	2.83	7.13	0.00488231	0.0202076
Suco	-0.54	0.69	1.47	2.76	0.00584767	0.0235562
Tbc1d1	-0.54	0.69	1.05	2.07	0.00601873	0.0241126
Nln	-0.54	0.69	0.75	1.68	0.0127326	0.043919
Fam174b	-0.54	0.69	4.72	26.43	0.0129778	0.0444952
Dmd	-0.55	0.68	1.91	3.75	0.00120126	0.00633581
Dennd6a	-0.55	0.68	1.56	2.96	0.00121222	0.00638707
Rcan3	-0.55	0.69	1.55	2.93	0.00159022	0.00798851
Rxra	-0.55	0.68	2.81	7.03	0.0021367	0.0102269
Dpp7	-0.55	0.68	1.79	3.46	0.00254542	0.0118141
Marcks	-0.55	0.68	3.07	8.38	0.00311379	0.0139895
Zfp358	-0.55	0.68	1.92	3.79	0.00334595	0.0148439
Ppp1r37	-0.55	0.68	3.73	13.3	0.00346896	0.0152837
Eef2k	-0.55	0.69	2.57	5.93	0.0045548	0.0191616
Scfd2	-0.55	0.68	1.01	2.02	0.00606084	0.0242711
Prdm15	-0.55	0.68	1.08	2.12	0.00770502	0.0294411
Nfkbil1	-0.55	0.68	0.84	1.79	0.00805004	0.0305318
Dnajb9	-0.55	0.68	2.89	7.43	0.00887683	0.0328648
Smim19	-0.55	0.68	0.89	1.86	0.0110631	0.0393253
Ddx51	-0.55	0.68	0.61	1.52	0.0121066	0.0422287
Inpp5b	-0.56	0.68	2.38	5.21	0.000316571	0.00203655
Acad8	-0.56	0.68	2.55	5.84	0.000472194	0.00287427
Dnlz	-0.56	0.68	1.59	3.01	0.000736317	0.00418977
Nat10	-0.56	0.68	1.76	3.39	0.000773144	0.00436938
Med22	-0.56	0.68	2.67	6.39	0.00105392	0.00567607
Psen2	-0.56	0.68	2.56	5.91	0.0015571	0.0078375
Limd2	-0.56	0.68	1.98	3.96	0.00202057	0.00977194
Scap	-0.56	0.68	3.05	8.26	0.0021787	0.0103751
Slc35e1	-0.56	0.68	2.91	7.51	0.00244513	0.0114419
Gm15800	-0.56	0.68	2.91	7.52	0.00265784	0.0122306
Aff1	-0.56	0.68	2.98	7.9	0.00304353	0.0136919
Ctns	-0.56	0.68	1.5	2.82	0.00341638	0.0151157
Stxbp6	-0.56	0.68	1.49	2.81	0.00361143	0.0157959
Ndufs6	-0.56	0.68	1.81	3.52	0.00389261	0.0168389
Tmem214	-0.56	0.68	4.56	23.62	0.0039851	0.017145
Edf1	-0.56	0.68	2.8	6.95	0.00403756	0.017327
H1f0	-0.56	0.68	4.99	31.79	0.00489363	0.0202381
Sbf1	-0.56	0.68	3.19	9.14	0.00541234	0.0220452
Reps1	-0.56	0.68	1.93	3.8	0.00542586	0.0220915
Ciapin1	-0.56	0.68	1.33	2.51	0.00591111	0.0237557
Taf9	-0.56	0.68	1.02	2.03	0.00863685	0.0323267
Dhx37	-0.56	0.68	1.07	2.1	0.0129324	0.044429
Zadh2	-0.57	0.67	2.47	5.53	0.000393725	0.00246481
Ngly1	-0.57	0.67	2.52	5.73	0.000522382	0.00312697
D10Jhu81e	-0.57	0.67	2.62	6.13	0.000572451	0.00336767
Cacna1d	-0.57	0.67	1.57	2.98	0.000626459	0.00363737
Sigmar1	-0.57	0.68	1.52	2.86	0.0008461	0.00471241
Ilf3	-0.57	0.67	2.23	4.69	0.000898723	0.00495967
Mrps2	-0.57	0.68	1.54	2.91	0.00130913	0.00679291
Amigo1	-0.57	0.67	1.26	2.39	0.00168267	0.00837496
Zfp768	-0.57	0.68	1.39	2.62	0.00180527	0.00890299
Magt1	-0.57	0.67	4.16	17.92	0.00184883	0.00908286
Gtf2b	-0.57	0.67	1.37	2.59	0.00302738	0.0136372
Myrip	-0.57	0.68	1.32	2.5	0.00341166	0.0151027
Nop2	-0.57	0.67	1.46	2.74	0.00450819	0.0189811
Traf4	-0.57	0.67	1.5	2.83	0.00469488	0.019606
Plcb1	-0.57	0.67	1.28	2.44	0.00580896	0.0234186
Ddc	-0.57	0.67	1.09	2.13	0.00896097	0.0330758
Mafk	-0.58	0.67	2.09	4.27	0.000162296	0.00114783
Med14	-0.58	0.67	2.44	5.44	0.0001736	0.00121354
Ttc38	-0.58	0.67	2.25	4.77	0.000221579	0.00149686
Aebp2	-0.58	0.67	1.82	3.52	0.000306633	0.00198633
Zc3h15	-0.58	0.67	2.05	4.15	0.000355354	0.00224656
Cep104	-0.58	0.67	1.51	2.85	0.000460697	0.00282032
Arl6ip4	-0.58	0.67	2.27	4.83	0.00076363	0.00432358
1810011O10Rik	-0.58	0.67	2.66	6.32	0.000811188	0.0045551
Mrpl30	-0.58	0.67	1.97	3.92	0.00115047	0.00609619
Hspa9	-0.58	0.67	4.07	16.78	0.00149607	0.00758243
Arcn1	-0.58	0.67	4.67	25.44	0.00153274	0.0077415
Mospd3	-0.58	0.67	1.39	2.63	0.00154456	0.00778586
Dohh	-0.58	0.67	2.08	4.23	0.00175159	0.00867581
Tcirg1	-0.58	0.67	2.4	5.27	0.00179291	0.00885909
Hars	-0.58	0.67	2.46	5.51	0.00264948	0.0121976
Sec61a1	-0.58	0.67	5.54	46.67	0.00378528	0.0164511
Myo18a	-0.58	0.67	3.66	12.64	0.0038424	0.0166554
Tars	-0.58	0.67	3.71	13.13	0.00397747	0.0171193
Rpl36al	-0.58	0.67	2.24	4.71	0.00402294	0.0172788
Noc3l	-0.58	0.67	0.85	1.8	0.00477917	0.0199012
Cluh	-0.58	0.67	3.23	9.35	0.00522046	0.02134
Gcsh	-0.58	0.67	1.33	2.52	0.0127538	0.0439774
Slc38a5	-0.58	0.67	4.3	19.66	0.0147219	0.0490157
Mavs	-0.59	0.66	2.44	5.42	0.000124517	0.000912767
Ptpn3	-0.59	0.66	2.09	4.25	0.000557978	0.00329957
Ddhd2	-0.59	0.66	1.64	3.11	0.000603439	0.00351766
Cdkn2aipnl	-0.59	0.66	1.9	3.74	0.000706735	0.00404842
Gyg	-0.59	0.66	1.63	3.1	0.000738438	0.00419951
Sumo3	-0.59	0.66	2.75	6.72	0.000747533	0.00424652
Ctdspl	-0.59	0.66	2.15	4.44	0.000825795	0.00461264
Pkn1	-0.59	0.66	2.75	6.73	0.0010057	0.00544735
Zfp91	-0.59	0.67	2.76	6.78	0.0010775	0.00575715
Thrb	-0.59	0.66	1.34	2.54	0.00128299	0.00668095
Trappc10	-0.59	0.66	3.02	8.1	0.00141346	0.00723535
Rab3d	-0.59	0.67	5.55	46.85	0.00203743	0.00983958
Ankrd27	-0.59	0.66	1.57	2.97	0.0024005	0.0112607
Fopnl	-0.59	0.66	1.89	3.72	0.00294157	0.0133101
Pex14	-0.59	0.67	1.45	2.74	0.00303557	0.0136672
Trim37	-0.59	0.66	0.94	1.91	0.00304892	0.0137101
Rps15	-0.59	0.67	4.85	28.79	0.00314452	0.0141152
Lpin3	-0.59	0.66	1.28	2.42	0.0035686	0.0156487
Dcun1d3	-0.59	0.66	0.75	1.68	0.00655562	0.0258717
Rps19	-0.59	0.66	1.47	2.77	0.00713608	0.0277009
Rpia	-0.59	0.66	0.41	1.33	0.00739813	0.028513
Tmem206	-0.59	0.66	0.36	1.28	0.00940188	0.0344109
Selm	-0.59	0.66	1.62	3.08	0.0115917	0.040738
Pias2	-0.6	0.66	2.34	5.07	0.000173769	0.0012139
Lap3	-0.6	0.66	2.74	6.67	0.000263217	0.00173971
Fermt2	-0.6	0.66	1.94	3.84	0.000269349	0.00177397
Esrp2	-0.6	0.66	2.74	6.69	0.000402488	0.00250285
Rnf5	-0.6	0.66	2.15	4.45	0.000509515	0.00306136
Kdelr3	-0.6	0.66	2.02	4.07	0.000817075	0.00458063
Iscu	-0.6	0.66	1.52	2.87	0.000898694	0.00495967
Lman1	-0.6	0.66	4.71	26.24	0.00131742	0.00681985
Fam63a	-0.6	0.66	3.29	9.78	0.00142918	0.00730485
Smim13	-0.6	0.66	1.64	3.11	0.00180255	0.00889385
Cgrrf1	-0.6	0.66	0.96	1.94	0.00191267	0.00935163
Spcs2	-0.6	0.66	3.98	15.77	0.00281257	0.0128217
Alg3	-0.6	0.66	0.87	1.83	0.00327959	0.0146127
Igsf11	-0.6	0.66	0.95	1.93	0.00364548	0.0159109
Klhl42	-0.6	0.66	0.93	1.9	0.00394485	0.0170004
Sec31b	-0.6	0.66	0.63	1.55	0.00843411	0.0317184
Dkc1	-0.6	0.66	0.73	1.66	0.00849963	0.0319297
Xk	-0.6	0.66	0.35	1.27	0.00895121	0.0330566
Tigd2	-0.6	0.66	0.57	1.49	0.00977208	0.0355626
Rps19bp1	-0.6	0.66	0.29	1.23	0.0111131	0.039421
Ap1ar	-0.61	0.66	2.06	4.17	8.85e-05	0.000678184
Ogfod2	-0.61	0.65	2.11	4.31	0.000100477	0.000755459
Slc7a4	-0.61	0.66	1.85	3.62	0.000220753	0.00149325
Tsr1	-0.61	0.65	1.53	2.88	0.000225066	0.00151642
Zfp715	-0.61	0.66	1.88	3.67	0.000393423	0.00246443
1110008F13Rik	-0.61	0.65	1.74	3.33	0.000543028	0.00322793
Zbtb7a	-0.61	0.65	2.41	5.32	0.000646542	0.00374337
Atp5b	-0.61	0.66	6.18	72.46	0.000813456	0.00456533
Dnajc3	-0.61	0.65	5.63	49.62	0.000916082	0.00502839
Map3k9	-0.61	0.66	1.11	2.17	0.00106949	0.00572858
Ddx3x	-0.61	0.65	4.54	23.29	0.00107272	0.00574024
Eif2b4	-0.61	0.65	2.41	5.31	0.00107335	0.00574024
Glrx2	-0.61	0.65	1.82	3.53	0.00125173	0.00655145
Rnpepl1	-0.61	0.66	3.65	12.59	0.00138421	0.00710333
Dnajb11	-0.61	0.66	4.3	19.75	0.00168006	0.00837007
3110043O21Rik	-0.61	0.66	0.9	1.86	0.00209609	0.0100659
Nans	-0.61	0.66	2.83	7.13	0.00214524	0.0102492
Rplp0	-0.61	0.66	5.94	61.26	0.00353082	0.0155029
Lage3	-0.61	0.66	0.92	1.89	0.00380191	0.0165093
Me2	-0.61	0.65	1.43	2.69	0.00399721	0.0171898
Lars	-0.61	0.66	3.24	9.45	0.00547727	0.0222831
Fam122a	-0.61	0.65	0.38	1.3	0.0111198	0.0394311
[truncated: 1,095 more rows]

## Sheet: ras_mus.txt
HomoloGene.ID	Symbol	EntrezGene.ID	Former.Symbol
16	Alad	17025	ALAD
180	Jag1	16449	JAG1
203	Maoa	17161	MAOA
408	Ampd3	11717	AMPD3
480	Il1a	16175	IL1A
481	Il1b	16176	IL1B
534	Il13ra2	16165	IL13RA2
685	Itgb6	16420	ITGB6
811	Scnn1a	20276	SCNN1A
936	Calu	12321	CALU
996	Klf6	23849	KLF6
1000	Cldn4	12740	CLDN4
1011	Cst6	73720	CST6
1017	Ctnnd1	12388	CTNND1
1065	Dusp4	319520	DUSP4
1097	Ereg	13874	EREG
1198	Il13ra1	16164	IL13RA1
1252	Areg	11839	AREG
1352	Cda	72269	CDA
1466	Hbegf	15200	HBEGF
1563	Gna15	14676	GNA15
1662	Itga2	16398	ITGA2
1675	Itpr3	16440	ITPR3
1680	Jup	16480	JUP
1691	Kcnk1	16525	KCNK1
1696	Kcnn4	16534	KCNN4
1734	Lif	16878	LIF
1763	Tacstd2	56753	TACSTD2
1764	Epcam	17075	EPCAM
1767	Mxd1	17119	MXD1
1835	Mst1r	19882	MST1R
1895	Nt5e	23959	NT5E
2026	Ppl	19041	PPL
2113	Pthlh	19227	PTHLH
2252	Sdc1	20969	SDC1
2336	Sorl1	20660	SORL1
2342	Uap1	107652	UAP1
2390	Syk	20963	SYK
2431	Tgfa	21802	TGFA
2482	Phlda2	22113	PHLDA2
2524	Upp1	22271	UPP1
2534	Vegfa	22339	VEGFA
2558	Zfp36	22695	ZFP36
2751	Klf7	93691	KLF7
2850	Scel	64929	SCEL
2893	St3gal5	20454	ST3GAL5
2894	Ier3	15937	IER3
3019	Efnb2	13642	EFNB2
3228	Vcan	13003	VCAN
3254	Dusp1	19252	DUSP1
3256	Dusp5	240672	DUSP5
3263	Efnb1	13641	EFNB1
3265	Elf3	13710	ELF3
3279	Dpp4	13482	DPP4
3375	Ccl20	20297	CCL20
3576	Gdf15	23886	GDF15
3686	Pik3cd	18707	PIK3CD
3751	Hs3st1	15476	HS3ST1
3833	Elk3	13713	ELK3
3844	Fos	14281	FOS
3849	Gchfr	320415	GCHFR
3965	Mall	228576	MALL
4058	Krt7	110310	KRT7
4059	Lad1	16763	LAD1
4201	Nampt	59027	NAMPT
4222	Lhfpl2	218454	LHFPL2
4450	Wfdc2	67701	WFDC2
4475	Sfn	55948	SFN
4479	Irf6	54139	IRF6
4617	Emg1	14791	EMG1
4665	Ubd	24108	UBD
5249	Pnma2	239157	PNMA2
5258	Tmc6	217353	TMC6
7203	Phlda1	21664	PHLDA1
7301	Ehf	13661	EHF
7309	Mpzl2	14012	MPZL2
7326	G0s2	14373	G0S2
7359	Foxq1	15220	FOXQ1
7500	Ptx3	19288	PTX3
7502	Rab17	19329	RAB17
7573	Tsc22d1	21807	TSC22D1
7904	Prnp	19122	PRNP
7906	St14	19143	ST14
7925	S100a6	20200	S100A6
8042	Spry4	24066	SPRY4
8094	Ell2	192657	ELL2
8299	Clcf1	56708	CLCF1
8397	Dsc2	13506	DSC2
8426	Sema4b	20352	SEMA4B
8451	Tnfrsf12a	27279	TNFRSF12A
8560	Cd274	60533	CD274
8639	Ppp1r15a	17872	PPP1R15A
8696	Tnfrsf21	94185	TNFRSF21
8721	Kcnmb4	58802	KCNMB4
8803	Rab11fip4	268451	RAB11FIP4
9208	Tor1aip1	208263	TOR1AIP1
9289	Hook1	77963	HOOK1
9649	Cldn7	53624	CLDN7
9653	Spint1	20732	SPINT1
9773	Fermt1	241639	FERMT1
9781	Bspry	192120	BSPRY
9785	Esrp1	207920	ESRP1
9798	Stap2	106766	STAP2
9870	Slc41a2	338365	SLC41A2
10017	Arhgef10l	72754	ARHGEF10L
10103	5730559C18Rik	67313	C1orf106
10325	Fut2	14344	FUT2
10477	Etl4	208618	KIAA1217
10609	Arntl2	272322	ARNTL2
10755	Angptl4	57875	ANGPTL4
10772	Ripk4	72388	RIPK4
10781	S100a14	66166	S100A14
10930	Ovol2	107586	OVOL2
11214	Pim1	18712	PIM1
11276	Cdcp1	109332	CDCP1
11713	Tmc5	74424	TMC5
11773	Dennd1c	70785	DENND1C
11971	2610528J11Rik	66451	C1orf210
11977	Acot11	329910	ACOT11
12059	2310030G06Rik	66952	C11orf52
12303	Erp27	69187	ERP27
12332	Krtcap3	69815	KRTCAP3
12374	Pgm2l1	70974	PGM2L1
12560	Tc2n	74413	TC2N
12613	Pcdh1	75599	PCDH1
12703	Vsig1	78789	VSIG1
12734	Nfkbiz	80859	NFKBIZ
12805	Ppp1r14c	76142	PPP1R14C
12873	Sesn2	230784	SESN2
13147	Tns4	217169	TNS4
14167	Mal2	105853	MAL2
14255	F11r	16456	F11R
15767	Eps8l1	67425	EPS8L1
15890	Fam83h	105732	FAM83H
16345	Sytl5	236643	SYTL5
16349	Tmem45b	235135	TMEM45B
17009	Map7d1	245877	MAP7D1
17563	Kdf1	69073	KDF1
17592	A130010J15Rik	319266	C1orf74
17739	Ttc39a	230603	TTC39A
18168	Aim1	11630	AIM1
18279	Lama3	16774	LAMA3
18379	Fam84b	399603	FAM84B
18485	Zfp608	269023	ZNF608
18897	Plekhg1	213783	PLEKHG1
19542	Dennd2c	329727	DENND2C
20006	Eppk1	223650	EPPK1
20457	Erbb3	13867	ERBB3
20571	Serpinb2	18788	SERPINB2
20580	Serpinb5	20724	SERPINB5
20613	Prss8	76560	PRSS8
20660	Slc9a1	20544	SLC9A1
20832	Inpp4b	234515	INPP4B
20917	Cdh1	12550	CDH1
20938	Ephb3	13845	EPHB3
20994	Dhrs3	20148	DHRS3
21040	Mmp14	17387	MMP14
21170	Tspan1	66805	TSPAN1
22659	Ikzf2	22779	IKZF2
22716	Tspan15	70423	TSPAN15
22823	Lmcd1	30937	LMCD1
22995	Rab25	53868	RAB25
23110	Dnaja4	58233	DNAJA4
23200	Pak6	214230	PAK6
23344	Prss22	70835	PRSS22
23421	Ralgps2	78255	RALGPS2
23441	Gdpd3	68616	GDPD3
23686	Vmp1	75909	VMP1
24376	Capza1	12340	CAPZA1
27827	Nfatc3	18021	NFATC3
28165	Nipal1	70701	NIPAL1
28424	Rasef	242505	RASEF
30948	Adrb2	11555	ADRB2
31000	Ptgs2	19225	PTGS2
31065	Mpp3	13384	MPP3
31121	Sdc4	20971	SDC4
31288	Oxsr1	108737	OXSR1
31387	Ptpre	19267	PTPRE
32492	Epb4.1l5	226352	EPB41L5
32531	Egln3	112407	EGLN3
32616	Grhl2	252973	GRHL2
32617	Esrp2	77411	ESRP2
34920	Ankrd22	52024	ANKRD22
36296	Scin	20259	SCIN
36321	Timp1	21857	TIMP1
37371	Pon3	269823	PON3
37520	Klf5	12224	KLF5
37552	Cyb561	13056	CYB561
37846	Vamp8	22320	VAMP8
37900	Slc16a3	80879	SLC16A3
38194	Tfpi2	21789	TFPI2
41128	Acp6	66659	ACP6
41133	Gltp	56356	GLTP
41157	Dlg3	53310	DLG3
41329	Arhgef3	71704	ARHGEF3
41394	Cgn	70737	CGN
41558	Chchd7	66433	CHCHD7
41901	Cgnl1	68178	CGNL1
42094	Mast4	328329	MAST4
44536	Prom2	192212	PROM2
45494	Tmem65	74868	TMEM65
45569	Tmem154	320782	TMEM154
45576	Myo1d	338367	MYO1D
45837	C77080	97130	KIAA1522
48065	Frk	14302	FRK
48120	Plaur	18793	PLAUR
48133	Mapk13	26415	MAPK13
48353	Scarb2	12492	SCARB2
49392	Ero1l	50527	ERO1L
49741	AA986860	212439	C1orf116
49933	Misp	78906	MISP
51919	9130008F23Rik	71583	C6orf141
51943	Fam102a	98952	FAM102A
51953	Gpr115	78249	GPR115
52172	Plekha7	233765	PLEKHA7
52649	Ttc9	69480	TTC9
55467	Fbp1	14121	FBP1
55469	Ldlr	16835	LDLR
55621	Dusp6	67603	DUSP6
55699	Rac2	19354	RAC2
55827	Galnt3	14425	GALNT3
55953	Ndrg1	17988	NDRG1
56284	Fa2h	338521	FA2H
56394	Egr1	13653	EGR1
56528	Ywhaz	22631	YWHAZ
56688	Nav3	260315	NAV3
56791	Epn3	71889	EPN3
56971	Tnfsf13	69583	TNFSF13
57056	Otub2	68149	OTUB2
57160	Kalrn	545156	KALRN
64466	Smim14	68552	SMIM14
68080	Aldh1a3	56847	ALDH1A3
68095	Hpgd	15446	HPGD
68173	Cds1	74596	CDS1
68496	Tuba4a	22145	TUBA4A
69254	Mctp2	244049	MCTP2
69359	Map1lc3b	67443	MAP1LC3B
69513	Tmem87b	72477	TMEM87B
70486	Slc37a1	224674	SLC37A1
74302	Slc2a3	20527	SLC2A3
74384	Adam8	11501	ADAM8
74841	Csnk1d	104318	CSNK1D
80930	Tmprss4	214523	TMPRSS4
81678	Ehd1	13660	EHD1
82192	Gm15753	624083	SP110
82192	Gm16026	101056250	SP110
82192	Sp110	109032	SP110
84338	Ston2	108800	STON2
84384	Prkch	18755	PRKCH
100680	Rps6ka2	20112	RPS6KA2
105490	Cxcl1	14825	CXCL2
113516	B3gnt3	72297	B3GNT3
117695	Cxcl2	20310	CXCL3
121495	Nr3c2	110784	NR3C2
128318	A830010M20Rik	231570	KIAA1107
129806	Tnfrsf10b	21933	TNFRSF10A
133755	Tmem30b	238257	TMEM30B
133768	Serpinb1a	66222	SERPINB1

## Sheet: classical_mus.txt
HomoloGene.ID	Symbol	EntrezGene.ID	Former.Symbol
2426	Tff1	21784	TFF1
2427	Tff3	21786	TFF3
2961	Gprc5a	232431	GPRC5A
3265	Elf3	13710	ELF3
4356	Fxyd3	17178	FXYD3
4674	Agr2	23795	AGR2
7359	Foxq1	15220	FOXQ1
7822	Muc13	17063	MUC13
7937	St6galnac1	20445	ST6GALNAC1
15039	Sdr16c5	242285	SDR16C5
15643	Capn8	170725	CAPN8
16349	Tmem45b	235135	TMEM45B
18257	Tox3	244579	TOX3
20457	Erbb3	13867	ERBB3
20479	Gpx2	14776	GPX2
20968	Tspan8	216350	TSPAN8
21239	Lgals4	16855	LGALS4
68270	Pls1	102502	PLS1
70969	Atp10b	319767	ATP10B

## Sheet: exocrine_mus.txt
HomoloGene.ID	Symbol	EntrezGene.ID	Former.Symbol
715	Pla2g1b	18778	PLA2G1B
1383	Clps	109791	CLPS
3936	Pnliprp2	18947	PNLIPRP2
30999	Pnlip	69060	PNLIP
37289	Slc3a1	20532	SLC3A1
37529	Cel	12613	CEL
55465	Cftr	12638	CFTR
55776	Slc4a4	54403	SLC4A4
68127	Cpb1	76703	CPB1
68282	Reg1	19692	REG1A
68300	Spink3	20730	SPINK1
68517	Reg2	19693	REG1B
88564	Ctrb1	66473	CTRB2
122141	Prss2	22072	PRSS2
128227	Cela3b	67868	CELA3B
129880	Cela3a	242711	CELA3A
130506	Reg3b	18489	REG3A
133790	Gp2	67133	GP2
134623	Try10	436522	PRSS1

## Sheet: palette.txt
Class	Color
exocrine	#0000cc
classical	#339900
unique	#000000
other	#e0e0e0
RAS	#ff00cc
