# Supplementary material for: The acinar differentiation determinant PTF1A inhibits initiation of pancreatic ductal adenocarcinoma
Source: eLife journal article supplement (doi:10.7554/elife.07125), 2015-07-07
Supplement: supp [file elife-07125-supp-v1.zip › elife_poa_e07125_Supplementary_File_3.xls]

## Sheet: Canonical Pathways UP 1.5-fold
© 2000-2015 QIAGEN. All rights reserved.
Ingenuity Canonical Pathways	-log(p-value)	Ratio	z-score	Molecules
Hepatic Fibrosis / Hepatic Stellate Cell Activation	1.17E01	2.19E-01		IGFBP4,MMP2,IFNAR2,COL6A1,COL27A1,COL1A1,ACTA2,LEPR,VCAM1,IFNGR1,MYH14,FN1,STAT1,COL20A1,MYH11,EDN1,COL6A6,NFKB1,CCL5,COL15A1,COL6A3,PDGFRA,TNFRSF1B,CD14,COL3A1,COL1A2,IGFBP5,MYH10,MYL9,COL6A2,COL5A1,COL18A1,IGF1R,AGT,NFKB2,MYL6,TGFBR2,COL16A1,COL5A2,IL4R,BAX,COL11A2,PDGFA
Complement System	8.55E00	4.17E-01	0.832	ITGAM,CFB,C3,CFI,C1QB,C1R,CFH,C3AR1,C1QA,C1QC,C4A/C4B,C2,CD55,CFD,SERPING1
Dendritic Cell Maturation	8.34E00	2.01E-01		PIK3C2A,HLA-DQA1,DDR1,PLCE1,COL1A1,FCER1G,LEPR,PIK3R1,IRF8,PIK3CD,STAT1,TYROBP,HLA-DRB5,PIK3C3,PIK3C2G,IL33,NFKB1,PIK3R3,HLA-DQB1,TNFRSF1B,COL3A1,COL1A2,PIK3C2B,B2M,COL18A1,HLA-DRA,PLCG2,NFKB2,HLA-A,FCGR2B,TLR3,MAPK13,PLCH2,COL11A2
iCOS-iCOSL Signaling in T Helper Cells	8.01E00	2.43E-01	4.000	ITPR2,PIK3C2A,HLA-DQA1,PLEKHA2,CHP1,IL2RB,FCER1G,PIK3R1,IL2RG,LCP2,PIK3CD,HLA-DRB5,ITPR1,NFAT5,PIK3C3,PIK3C2G,NFKB1,PIK3R3,HLA-DQB1,ICOSLG/LOC102723996,PIK3C2B,VAV1,HLA-DRA,NFKB2,PTPRC
Leukocyte Extravasation Signaling	7.87E00	1.87E-01	5.099	ITGAM,ITGAL,VCL,PIK3C2A,MMP2,CLDN3,NCF1,CLDN4,WIPF1,ACTA2,PIK3R1,THY1,RAC2,CTNND1,VCAM1,CXCR4,PIK3CD,ACTB,MMP15,PIK3C3,PIK3C2G,PIK3R3,CTTN,MSN,PIK3C2B,CD44,VAV1,PLCG2,MYL6,MAPK13,SELPLG,ARHGAP4,ITGA4,CYBB,CYBA,MMP14
Antigen Presentation Pathway	7.38E00	3.78E-01		HLA-E,CD74,HLA-DQA1,NLRC5,B2M,TAP1,TAPBP,HLA-DRA,HLA-A,TAP2,HLA-DRB5,MR1,CIITA,PSMB8
Virus Entry via Endocytic Pathways	7.28E00	2.47E-01		ITGAL,PIK3R3,ITGB5,PIK3C2A,ITSN1,FLNA,PIK3C2B,B2M,ACTA2,PIK3R1,RAC2,ITGB7,PLCG2,HLA-A,PIK3CD,ITGB6,ACTB,CD55,ITGA4,CXADR,PIK3C2G,PIK3C3
Production of Nitric Oxide and Reactive Oxygen Species in Macrophages	7.14E00	1.84E-01	4.700	JUN,IRF1,PIK3C2A,NCF1,JAK3,RHOC,PIK3R1,IFNGR1,IRF8,PIK3CD,STAT1,CAT,SIRPA,PIK3C3,PIK3C2G,ALB,NFKB1,PIK3R3,TNFRSF1B,APOD,MAP3K12,PIK3C2B,PCYOX1,PLCG2,NFKB2,LYZ,CLU,ARG2,MAPK13,APOE,PPP1R3A,CYBB,CYBA
IL-9 Signaling	6.96E00	3.82E-01	3.464	NFKB1,PIK3R3,PIK3C2A,JAK3,PIK3C2B,CISH,PIK3R1,IL2RG,NFKB2,PIK3CD,STAT1,PIK3C2G,PIK3C3
UVA-Induced MAPK Signaling	6.78E00	2.41E-01	3.464	PARP12,JUN,SMPD2,PIK3R3,PIK3C2A,PARP4,PIK3C2B,PLCE1,PIK3R1,PLCG2,PARP10,PIK3CD,ZC3HAV1,STAT1,PARP3,MAPK13,PLCH2,RPS6KA1,CASP3,PIK3C2G,PIK3C3
Integrin Signaling	6.73E00	1.74E-01	5.385	ITGAM,ITGAL,VCL,PIK3C2A,NEDD9,RHOC,TSPAN7,PARVA,WIPF1,ACTA2,PIK3R1,RAC2,ITGB7,PIK3CD,ITGB6,ACTB,ARPC4,PIK3C3,PIK3C2G,ITGB5,PIK3R3,ARPC3,CTTN,CAPN1,MYL12A,PIK3C2B,MYL9,GRB7,PLCG2,TSPAN3,TSPAN1,NCK2,CAPN6,ITGA4
Amyotrophic Lateral Sclerosis Signaling	6.57E00	2.27E-01		RNF19A,GLUL,PIK3R3,GRIK5,PIK3C2A,APAF1,CAPN1,PIK3C2B,SLC1A2,PIK3R1,CCS,NAIP,GRIA3,PIK3CD,CAPN6,CAT,CASP3,XIAP,BAX,PIK3C2G,PIK3C3,CASP7
CD28 Signaling in T Helper Cells	6.53E00	2.12E-01	4.359	JUN,ITPR2,NFKB1,PIK3R3,PIK3C2A,ARPC3,HLA-DQA1,HLA-DQB1,CHP1,PIK3C2B,FCER1G,PIK3R1,VAV1,HLA-DRA,NFKB2,LCP2,PIK3CD,ARPC4,HLA-DRB5,ITPR1,PTPRC,NFAT5,PIK3C2G,PIK3C3
Death Receptor Signaling	6.43E00	2.31E-01	3.710	PARP12,TANK,NFKB1,PARP4,APAF1,TNFRSF1B,TNFRSF21,ACTA2,ARHGDIB,PARP10,NFKB2,NAIP,ACTB,ZC3HAV1,PARP3,CASP3,XIAP,GAS2,CASP2,CASP8,CASP7
Atherosclerosis Signaling	6.03E00	2E-01		CCR2,ALOX12,NFKB1,APOD,COL3A1,PLA2G1B,PCYOX1,COL1A2,COL1A1,COL18A1,VCAM1,NFKB2,LYZ,CXCR4,GLG1,CLU,SELPLG,ITGA4,APOE,TNFRSF12A,COL11A2,PDGFA,IL33,ALB
LXR/RXR Activation	5.41E00	1.9E-01	-0.218	NFKB1,TF,C3,SERPINF1,CD14,TNFRSF1B,APOD,FASN,PCYOX1,NFKB2,AGT,LYZ,C4A/C4B,TLR3,SCD,CLU,ARG2,APOE,AMBP,PLTP,IL33,TTR,ALB
Clathrin-mediated Endocytosis Signaling	5.4E00	1.63E-01		TF,PIK3C2A,CHP1,ACTA2,PIK3R1,ARRB2,RAB4B,ITGB7,PIK3CD,ITGB6,ACTB,HSPA8,ARPC4,PIK3C3,PIK3C2G,ALB,SH3KBP1,ITGB5,PIK3R3,ARPC3,CTTN,APOD,PIK3C2B,PCYOX1,LYZ,CLU,APOE,DAB2,PDGFA,STAM
PKCθ Signaling in T Lymphocytes	5.38E00	1.95E-01	2.000	JUN,NFKB1,PIK3R3,PIK3C2A,HLA-DQA1,HLA-DQB1,CHP1,MAP3K12,PIK3C2B,FCER1G,PIK3R1,RAC2,VAV1,HLA-DRA,PLCG2,NFKB2,LCP2,PIK3CD,HLA-DRB5,NFAT5,PIK3C2G,PIK3C3
Docosahexaenoic Acid (DHA) Signaling	5.31E00	3.08E-01		PIK3R3,PIK3CD,PIK3C2A,APAF1,SERPINF1,PIK3C2B,CASP3,APP,BAX,PIK3R1,PIK3C3,PIK3C2G
PI3K Signaling in B Lymphocytes	5.28E00	1.87E-01		JUN,ITPR2,NFKB1,C3,PLEKHA2,CHP1,PLCE1,PIK3R1,VAV1,ATF3,PLCG2,NFKB2,FCGR2B,PIK3CD,PIK3AP1,PLCH2,IL4R,ITPR1,PTPRC,NFAT5,BLNK,CD81,LYN
Macropinocytosis Signaling	5.16E00	2.35E-01	3.162	PIK3R3,ITGB5,PIK3C2A,CD14,RAB34,PIK3C2B,PIK3R1,CSF1R,ITGB7,PLCG2,MRC1,PIK3CD,ITGB6,PDGFA,PIK3C2G,PIK3C3
Actin Cytoskeleton Signaling	5.07E00	1.52E-01		IQGAP1,VCL,PIK3C2A,ACTA2,PIK3R1,RAC2,MYH14,FN1,PIK3CD,ACTB,ARPC4,MYH11,ARHGEF4,PIK3C3,PIK3C2G,LIMK2,PIK3R3,ARPC3,FLNA,CD14,MYL12A,MSN,TIAM1,PIK3C2B,MYH10,MYL9,VAV1,MYL6,NCKAP1L,ITGA4,PDGFA,PFN2
Fcγ Receptor-mediated Phagocytosis in Macrophages and Monocytes	5.05E00	2.04E-01	4.359	PIK3R3,ARPC3,PLD3,NCF1,FYB,PLD4,ACTA2,PIK3R1,PLD1,RAC2,VAV1,LCP2,MYO5A,NAPEPLD,ACTB,NCK2,ARPC4,PIK3C2G,LYN
Axonal Guidance Signaling	4.84E00	1.22E-01		SEMA4G,MMP2,PIK3C2A,SMO,CHP1,SLIT3,PLCE1,ADAMTS2,PLXNB1,CXCR4,PIK3CD,FZD1,ERBB2,FES,STK36,PIK3C3,ADAM9,PIK3R3,ARPC3,EPHB3,ADAM19,PIK3C2B,MYL9,ADAM15,SEMA4B,GNB5,NCK2,ITGA4,PRKAG1,L1CAM,GLI1,MICAL1,WIPF1,PIK3R1,RAC2,ARPC4,EFNA1,NFAT5,PIK3C2G,LIMK2,ITSN1,TUBB,SDC2,SEMA3B,MYL12A,PLCG2,MYL6,BMP1,PLCH2,ABLIM1,PDGFA,PFN2
IL-4 Signaling	4.75E00	2.19E-01		PIK3R3,PIK3C2A,HLA-DQA1,HLA-DQB1,IL13RA1,JAK3,PIK3C2B,PIK3R1,IL2RG,HLA-DRA,PIK3CD,HLA-DRB5,IL4R,NFAT5,PIK3C2G,PIK3C3
IL-15 Signaling	4.69E00	2.27E-01		NFKB1,PIK3R3,PIK3C2A,JAK3,IL2RB,PIK3C2B,PIK3R1,IL2RG,VCAM1,NFKB2,PIK3CD,MAPK13,AXL,PIK3C2G,PIK3C3
ILK Signaling	4.64E00	1.55E-01	4.426	JUN,PIK3C2A,RHOC,PARVA,ACTA2,PIK3R1,ITGB7,VIM,MYH14,FN1,PIK3CD,ITGB6,ACTB,MYH11,FBLIM1,PIK3C3,PIK3C2G,NFKB1,ITGB5,PIK3R3,FLNA,PIK3C2B,MYH10,MYL9,NFKB2,MYL6,NCK2,CASP3
Paxillin Signaling	4.64E00	1.92E-01	3.207	ITGAM,ITGAL,PIK3R3,ITGB5,PIK3C2A,VCL,PIK3C2B,PARVA,ACTA2,PIK3R1,ITGB7,PIK3CD,ITGB6,ACTB,NCK2,MAPK13,ITGA4,PIK3C2G,PIK3C3
Sphingosine-1-phosphate Signaling	4.61E00	1.85E-01	3.357	SMPD2,PIK3R3,PIK3C2A,PDGFRA,ADCY7,PIK3C2B,RHOC,PLCE1,PIK3R1,PLCG2,PIK3CD,NAAA,PLCH2,CASP3,PDGFA,CASP2,PIK3C2G,PIK3C3,CASP8,CASP7
Role of JAK1 and JAK3 in γc Cytokine Signaling	4.55E00	2.33E-01		PIK3R3,PIK3C2A,JAK3,IL2RB,PIK3C2B,PIK3R1,IL2RG,PIK3CD,STAT1,IL4R,BLNK,FES,PIK3C2G,PIK3C3
Signaling by Rho Family GTPases	4.54E00	1.42E-01	5.303	JUN,IQGAP1,PIK3C2A,RHOC,WIPF1,ACTA2,PIK3R1,PLD1,VIM,ARHGEF19,PIK3CD,ACTB,ARPC4,CDH11,ARHGEF4,PIK3C3,PIK3C2G,NFKB1,ARHGEF3,LIMK2,PIK3R3,ARPC3,MYL12A,MSN,MAP3K12,PIK3C2B,MYL9,NFKB2,MYL6,GNB5,KIAA1804,ITGA4,CYBB
Role of NFAT in Regulation of the Immune Response	4.45E00	1.57E-01	4.243	JUN,ITPR2,PIK3C2A,HLA-DQA1,CHP1,FCER1G,PIK3R1,LCP2,PIK3CD,HLA-DRB5,ITPR1,NFAT5,BLNK,PIK3C3,PIK3C2G,NFKB1,PIK3R3,HLA-DQB1,PIK3C2B,HLA-DRA,PLCG2,NFKB2,XPO1,FCGR2B,GNB5,LYN
NRF2-mediated Oxidative Stress Response	4.39E00	1.53E-01	3.317	JUN,PIK3C2A,FMO1,DNAJC4,ACTA2,PIK3R1,PRDX1,ENC1,PIK3CD,DNAJC9,ACTB,CAT,GPX2,PIK3C3,PIK3C2G,GCLC,PIK3R3,ABCC2,CBR1,GSTM3,PIK3C2B,MGST1,SOD3,GSTM4,EPHX1,VCP,NFE2L2
Rac Signaling	4.39E00	1.84E-01	4.359	JUN,IQGAP1,NFKB1,LIMK2,PIK3R3,PIK3C2A,ARPC3,TIAM1,PIK3C2B,PIK3R1,PLD1,CD44,NFKB2,PIK3CD,ARPC4,ITGA4,CYBB,PIK3C2G,PIK3C3
Acute Phase Response Signaling	4.36E00	1.55E-01	1.886	JUN,CFB,TF,C3,SERPINF1,PIK3R1,C1R,C4A/C4B,FN1,PIK3CD,C2,VWF,AMBP,ITIH2,IL33,ALB,NFKB1,PIK3R3,CP,TNFRSF1B,SERPINA3,AGT,NFKB2,MAPK13,SERPING1,TTR
Interferon Signaling	4.33E00	2.94E-01	2.828	IRF1,IFNGR1,IRF9,IFNAR2,STAT1,IFITM2,IFI35,BAX,TAP1,PSMB8
IL-12 Signaling and Production in Macrophages	4.32E00	1.68E-01		IRF1,JUN,ALOX12,NFKB1,PIK3R3,PIK3C2A,APOD,PIK3C2B,PCYOX1,PIK3R1,NFKB2,IFNGR1,LYZ,IRF8,PIK3CD,STAT1,CLU,MAPK13,APOE,PIK3C2G,PIK3C3,ALB
Reelin Signaling in Neurons	4.3E00	2.03E-01		ITGAL,ARHGEF3,PIK3R3,PIK3C2A,PIK3C2B,APP,PIK3R1,FRK,PIK3CD,ITGA4,APOE,PAFAH1B3,ARHGEF4,PIK3C2G,PIK3C3,LYN
FcγRIIB Signaling in B Lymphocytes	4.29E00	2.68E-01	3.162	PIK3R3,PIK3CD,FCGR2B,PIK3C2A,PIK3C2B,BLNK,PIK3R1,PIK3C3,PIK3C2G,PLCG2,LYN
PEDF Signaling	4.29E00	2.11E-01	3.873	NFKB1,TCF12,PIK3R3,PIK3C2A,SERPINF1,ZEB1,PIK3C2B,PIK3R1,NFKB2,PIK3CD,MAPK13,PIK3C2G,PIK3C3,CASP8,CASP7
PAK Signaling	4.25E00	1.93E-01	4.000	LIMK2,PIK3R3,PIK3C2A,EPHB3,PDGFRA,MYL12A,PIK3C2B,MYL9,PIK3R1,MYL6,PIK3CD,NCK2,CASP3,ITGA4,PDGFA,PIK3C2G,PIK3C3
Apoptosis Signaling	4.25E00	1.93E-01	1.213	NFKB1,APAF1,BCL2L11,TNFRSF1B,CAPN1,PLCG2,NFKB2,NAIP,CAPN6,RPS6KA1,CASP3,XIAP,BAX,GAS2,CASP2,CASP8,CASP7
Renin-Angiotensin Signaling	4.1E00	1.76E-01	3.900	JUN,ITPR2,NFKB1,PIK3R3,PIK3C2A,CCL5,ADCY7,PIK3C2B,PIK3R1,PLCG2,NFKB2,AGT,PIK3CD,STAT1,MAPK13,ITPR1,PRKAG1,PIK3C2G,PIK3C3
Myc Mediated Apoptosis Signaling	4.07E00	2.24E-01		PIK3R3,PIK3C2A,APAF1,PIK3C2B,PIK3R1,YWHAH,IGF1R,PIK3CD,CASP3,BAX,PIK3C2G,PIK3C3,CASP8
Role of Pattern Recognition Receptors in Recognition of Bacteria and Viruses	3.99E00	1.68E-01	4.243	NFKB1,PIK3R3,C3,PIK3C2A,CCL5,C1QB,OAS2,PIK3C2B,DDX58,PIK3R1,C3AR1,C1QA,PLCG2,NFKB2,C1QC,PIK3CD,TLR3,IFIH1,PIK3C2G,PIK3C3
Endothelin-1 Signaling	3.98E00	1.5E-01	3.000	JUN,ITPR2,PIK3C2A,PLD3,PLA2G1B,PLCE1,PIK3R1,PLD1,PIK3CD,EDN1,ITPR1,CASP2,PIK3C3,PIK3C2G,CASP7,PIK3R3,ADCY7,PIK3C2B,PLD4,PLCG2,NAPEPLD,MAPK13,PLCH2,CASP3,CASP8
Cdc42 Signaling	3.96E00	1.63E-01	2.887	JUN,IQGAP1,HLA-E,LIMK2,ARPC3,HLA-DQA1,HLA-DQB1,MYL12A,B2M,MYL9,WIPF1,FCER1G,VAV1,HLA-DRA,MYL6,LLGL1,HLA-A,ARPC4,HLA-DRB5,MAPK13,ITGA4
NF-κB Signaling	3.89E00	1.48E-01	4.491	PIK3C2A,DDR1,FCER1G,PIK3R1,FGFRL1,PIK3CD,GHR,PIK3C3,PIK3C2G,IL33,TANK,NFKB1,PIK3R3,PDGFRA,TNFRSF1B,TGFBR3,PIK3C2B,PLCG2,IGF1R,NFKB2,BMPR1A,TGFBR2,TLR3,TNIP1,CASP8
MSP-RON Signaling Pathway	3.8E00	2.39E-01		ITGAM,CCR2,PIK3R3,PIK3CD,PIK3C2A,ACTB,PIK3C2B,ACTA2,PIK3R1,PIK3C3,PIK3C2G
Lymphotoxin β Receptor Signaling	3.77E00	2.22E-01	3.317	NFKB2,NFKB1,PIK3R3,PIK3CD,PIK3C2A,APAF1,PIK3C2B,CASP3,PIK3R1,VCAM1,PIK3C3,PIK3C2G
Role of IL-17A in Arthritis	3.77E00	2.22E-01		NFKB2,NFKB1,PIK3R3,PIK3CD,PIK3C2A,CCL5,MAPK13,RPS6KA1,PIK3C2B,PIK3R1,PIK3C3,PIK3C2G
Estrogen-Dependent Breast Cancer Signaling	3.76E00	2.1E-01		JUN,NFKB1,PIK3R3,PIK3C2A,PIK3C2B,HSD17B12,PIK3R1,NFKB2,IGF1R,PIK3CD,HSD17B4,PIK3C2G,PIK3C3
IL-8 Signaling	3.73E00	1.42E-01	4.491	JUN,IQGAP1,ITGAM,PIK3C2A,MMP2,PLD3,RHOC,PIK3R1,PLD1,RAC2,ARRB2,VCAM1,PIK3CD,PIK3C3,PIK3C2G,NFKB1,LIMK2,ITGB5,PIK3R3,PIK3C2B,PLD4,MYL9,NAPEPLD,GNB5,BAX,CYBB
TNFR1 Signaling	3.71E00	2.34E-01	1.508	JUN,NFKB2,TANK,NAIP,NFKB1,APAF1,CASP3,XIAP,CASP2,CASP8,CASP7
TWEAK Signaling	3.67E00	2.73E-01	1.667	NFKB2,NAIP,NFKB1,APAF1,CASP3,XIAP,TNFRSF12A,CASP8,CASP7
fMLP Signaling in Neutrophils	3.66E00	1.68E-01	4.123	ITPR2,NFKB1,PIK3R3,PIK3C2A,ARPC3,CHP1,NCF1,PIK3C2B,PIK3R1,NFKB2,PIK3CD,GNB5,ARPC4,ITPR1,NFAT5,CYBB,PIK3C2G,PIK3C3
Agranulocyte Adhesion and Diapedesis	3.65E00	1.43E-01		MMP2,CLDN3,CLDN4,ACTA2,VCAM1,ITGB7,CXCR4,MYH14,GLG1,FN1,ACTB,MYH11,CXCL16,MMP15,IL33,CCL5,MSN,MYH10,MYL9,MYL6,CXCL13,SELPLG,ITGA4,CXCL14,MMP14
Caveolar-mediated Endocytosis Signaling	3.64E00	1.94E-01		ITGAM,ITGAL,ITGB5,ITSN1,FLNA,B2M,ACTA2,ITGB7,HLA-A,ITGB6,ACTB,CD55,ITGA4,ALB
CD40 Signaling	3.61E00	2.03E-01	3.051	JUN,TANK,NFKB1,PIK3R3,PIK3C2A,JAK3,PIK3C2B,PIK3R1,NFKB2,PIK3CD,MAPK13,PIK3C2G,PIK3C3
Tec Kinase Signaling	3.61E00	1.47E-01	4.690	NFKB1,PIK3R3,PIK3C2A,TNFRSF21,JAK3,PIK3C2B,RHOC,ACTA2,FCER1G,PIK3R1,FRK,VAV1,PLCG2,NFKB2,PIK3CD,ACTB,GNB5,STAT1,GTF2I,ITGA4,PIK3C2G,PIK3C3,LYN
EGF Signaling	3.61E00	2.14E-01	3.464	JUN,ITPR2,PIK3R3,PIK3CD,PIK3C2A,STAT1,MAPK13,PIK3C2B,ITPR1,PIK3R1,PIK3C3,PIK3C2G
Intrinsic Prothrombin Activation Pathway	3.47E00	2.86E-01		PROS1,THBD,COL3A1,COL1A2,COL1A1,F13A1,COL11A2,COL18A1
Acute Myeloid Leukemia Signaling	3.38E00	1.84E-01	2.673	NFKB1,PIK3R3,PIK3C2A,CSF2RA,PIK3C2B,KIT,PIK3R1,CSF1R,NFKB2,PIK3CD,FLT3LG,TCF7L2,PIK3C2G,PIK3C3
Molecular Mechanisms of Cancer	3.34E00	1.14E-01		JUN,PIK3C2A,APAF1,BCL2L11,SMO,JAK3,GLI1,RHOC,PIK3R1,RAC2,CTNND1,ARHGEF19,PIK3CD,FZD1,ATR,XIAP,LRP1,ARHGEF4,STK36,PIK3C3,PIK3C2G,CASP7,NFKB1,ARHGEF3,PIK3R3,ADCY7,PIK3C2B,NFKB2,NCSTN,BMPR1A,NAIP,TGFBR2,HAT1,BMP1,MAPK13,ITGA4,CASP3,BAX,PRKAG1,HIPK2,CASP8
Type II Diabetes Mellitus Signaling	3.31E00	1.58E-01		NFKB1,SMPD2,PIK3R3,PIK3C2A,TNFRSF1B,PIK3C2B,PRKAB1,PKM,PIK3R1,NFKB2,PIK3CD,ACSL1,ACSL5,ADIPOR2,PRKAG1,PIK3C2G,PIK3C3,PRKAB2
Type I Diabetes Mellitus Signaling	3.24E00	1.6E-01		IRF1,NFKB1,HLA-E,APAF1,HLA-DQA1,HLA-DQB1,TNFRSF1B,FCER1G,HLA-DRA,NFKB2,IFNGR1,HLA-A,STAT1,HLA-DRB5,MAPK13,CASP3,CASP8
Pancreatic Adenocarcinoma Signaling	3.24E00	1.6E-01	4.000	NFKB1,PIK3R3,PIK3C2A,PLD3,JAK3,PIK3C2B,PLD4,PIK3R1,PLD1,NFKB2,TGFBR2,PIK3CD,NAPEPLD,STAT1,ERBB2,PIK3C2G,PIK3C3
IL-2 Signaling	3.23E00	2.08E-01	3.162	JUN,PIK3R3,PIK3CD,PIK3C2A,JAK3,IL2RB,PIK3C2B,PIK3R1,IL2RG,PIK3C3,PIK3C2G
Tight Junction Signaling	3.21E00	1.39E-01		JUN,NFKB1,VCL,TNFRSF1B,CLDN3,PVRL2,TIAM1,TJP2,CLDN4,MYH10,MYL9,ACTA2,NFKB2,MYL6,RAB13,LLGL1,CSTF3,MYH14,TGFBR2,ACTB,MYH11,TJP3,PRKAG1
p53 Signaling	3.17E00	1.63E-01	-0.832	JUN,PIK3R3,PIK3C2A,APAF1,CCNG1,PIK3C2B,TP53INP1,PIK3R1,THBS1,PIK3CD,ATR,PPP1R13B,BAX,HIPK2,PIK3C2G,PIK3C3
Colorectal Cancer Metastasis Signaling	3.17E00	1.26E-01	4.200	JUN,PIK3C2A,MMP2,SMO,JAK3,RHOC,PIK3R1,IFNGR1,PIK3CD,FZD1,STAT1,LRP1,TCF7L2,MMP15,PIK3C3,PIK3C2G,NFKB1,PIK3R3,ADCY7,PIK3C2B,NFKB2,TGFBR2,TLR3,GNB5,CASP3,BAX,PRKAG1,ADRBK2,MMP14
Phospholipase C Signaling	3.17E00	1.26E-01	4.472	ITPR2,PLD3,CHP1,PLA2G1B,PLCE1,RHOC,FCER1G,PLD1,LCP2,ARHGEF19,ITPR1,NFAT5,BLNK,ARHGEF4,NFKB1,ARHGEF3,ADCY7,MYL12A,PLD4,MYL9,PLCG2,NFKB2,MYL6,FCGR2B,NAPEPLD,GNB5,ITGA4,AHNAK,LYN
Crosstalk between Dendritic Cells and Natural Killer Cells	3.15E00	1.69E-01		NFKB1,ITGAL,HLA-E,TNFRSF1B,PVRL2,IL2RB,ACTA2,IL2RG,HLA-DRA,NFKB2,HLA-A,TLR3,ACTB,TYROBP,HLA-DRB5
OX40 Signaling Pathway	3.15E00	2.04E-01	2.000	JUN,NFKB2,NFKB1,HLA-E,HLA-A,HLA-DQA1,HLA-DQB1,HLA-DRB5,B2M,FCER1G,HLA-DRA
PTEN Signaling	3.13E00	1.53E-01	-2.183	NFKB1,PIK3R3,BCL2L11,PDGFRA,TGFBR3,DDR1,PIK3R1,RAC2,YWHAH,FGFRL1,NFKB2,IGF1R,BMPR1A,TGFBR2,PIK3CD,GHR,CASP3,ITGA4
JAK/Stat Signaling	3.1E00	1.81E-01	3.051	JUN,NFKB1,PIK3R3,PIK3C2A,JAK3,PIK3C2B,CISH,PIK3R1,NFKB2,PIK3CD,STAT1,PIK3C2G,PIK3C3
IL-17A Signaling in Airway Cells	3.05E00	1.88E-01		NFKB2,NFKB1,PIK3R3,PIK3CD,PIK3C2A,MAPK13,JAK3,PIK3C2B,PIK3R1,MUC5AC,PIK3C3,PIK3C2G
Leptin Signaling in Obesity	3.04E00	1.78E-01		PIK3R3,PIK3C2A,ADCY7,PIK3C2B,PLCE1,LEPR,PIK3R1,PLCG2,PIK3CD,PLCH2,PRKAG1,PIK3C2G,PIK3C3
Role of Osteoblasts, Osteoclasts and Chondrocytes in Rheumatoid Arthritis	3.02E00	1.26E-01		JUN,PIK3C2A,SMO,CHP1,SFRP1,COL1A1,PIK3R1,CSF1R,SFRP5,PIK3CD,FZD1,XIAP,LRP1,NFAT5,TCF7L2,SPP1,PIK3C3,PIK3C2G,IL33,NFKB1,PIK3R3,TNFRSF1B,PIK3C2B,BMPR1A,NAIP,BMP1,MMP14
Glucocorticoid Receptor Signaling	3.02E00	1.2E-01		JUN,PIK3C2A,CHP1,JAK3,PRKAB1,PIK3R1,YWHAH,VCAM1,PIK3CD,TSC22D3,STAT1,HSPA8,NFAT5,PIK3C3,PIK3C2G,NFKB1,PIK3R3,CCL5,TAF2,SLPI,PIK3C2B,HLTF,ANXA1,AGT,TGFBR2,PBX1,SGK1,MAPK13,CD163,PRKAG1,PRKAB2
ErbB2-ErbB3 Signaling	3.02E00	1.96E-01	3.162	JUN,PIK3R3,PIK3CD,PIK3C2A,ERBB2,JAK3,PIK3C2B,PIK3R1,ERBB3,PIK3C3,PIK3C2G
Chondroitin Sulfate Degradation (Metazoa)	2.98E00	3.85E-01		HEXB,GALNS,GM2A,CD44,MGEA5
Glioma Invasiveness Signaling	2.95E00	1.93E-01	3.317	PIK3R3,PIK3CD,ITGB5,PIK3C2A,MMP2,PIK3C2B,RHOC,PIK3R1,CD44,PIK3C3,PIK3C2G
Granulocyte Adhesion and Diapedesis	2.88E00	1.33E-01		ITGAM,ITGAL,MMP2,CCL5,TNFRSF1B,CLDN3,SDC2,MSN,CLDN4,THY1,VCAM1,CXCR4,GLG1,CXCL13,SELPLG,CXCL16,ITGA4,MMP15,CXCL14,SDC3,IL33,MMP14
HER-2 Signaling in Breast Cancer	2.87E00	1.71E-01		PIK3R3,ITGB5,PIK3C2A,MMP2,PIK3C2B,PIK3R1,ITGB7,PIK3CD,ITGB6,ERBB2,ERBB3,PIK3C2G,PIK3C3
T Helper Cell Differentiation	2.87E00	1.79E-01		IFNGR1,TGFBR2,HLA-DQA1,HLA-DQB1,STAT1,TNFRSF1B,HLA-DRB5,ICOSLG/LOC102723996,IL4R,FCER1G,IL2RG,HLA-DRA
Gαq Signaling	2.85E00	1.38E-01	3.900	ITPR2,NFKB1,PIK3R3,PIK3C2A,PLD3,CHP1,PIK3C2B,RHOC,PLD4,PIK3R1,PLD1,PLCG2,NFKB2,PIK3CD,NAPEPLD,GNB5,RGS2,ITPR1,PIK3C2G,PIK3C3
eNOS Signaling	2.84E00	1.41E-01	2.324	LPAR6,ITPR2,PIK3R3,PIK3C2A,ADCY7,PIK3C2B,PRKAB1,PIK3R1,NOSIP,PLCG2,PIK3CD,HSPA8,CASP3,ITPR1,PRKAG1,PIK3C2G,PIK3C3,CASP8,PRKAB2
FXR/RXR Activation	2.83E00	1.44E-01		TF,C3,ABCC2,SERPINF1,APOD,G6PC3,FASN,PCYOX1,AGT,C4A/C4B,CLU,APOE,HNF4A,AMBP,PLTP,IL33,TTR,ALB
FAK Signaling	2.83E00	1.63E-01		PIK3R3,PIK3C2A,VCL,CAPN1,PIK3C2B,ACTA2,PIK3R1,PLCG2,PIK3CD,ACTB,CAPN6,ITGA4,PIK3C2G,PIK3C3
RANK Signaling in Osteoclasts	2.83E00	1.63E-01		JUN,NFKB1,PIK3R3,PIK3C2A,CHP1,MAP3K12,PIK3C2B,PIK3R1,NFKB2,PIK3CD,MAPK13,XIAP,PIK3C2G,PIK3C3
Germ Cell-Sertoli Cell Junction Signaling	2.83E00	1.35E-01		IQGAP1,LAMC3,LIMK2,PIK3R3,PIK3C2A,TUBB,PVRL2,MAP3K12,PIK3C2B,RHOC,ACTA2,PIK3R1,RAC2,CTNND1,RAB8B,TGFBR2,PIK3CD,ACTB,PLS1,PIK3C2G,PIK3C3
Induction of Apoptosis by HIV1	2.82E00	1.86E-01	2.111	NFKB2,NAIP,CXCR4,NFKB1,APAF1,TNFRSF1B,SLC25A4,CASP3,XIAP,BAX,CASP8
Dermatan Sulfate Degradation (Metazoa)	2.82E00	3.57E-01		HEXB,GM2A,CD44,MGEA5,FGFRL1
PDGF Signaling	2.82E00	1.69E-01	3.606	JUN,PIK3R3,PIK3C2A,PDGFRA,JAK3,PIK3C2B,PIK3R1,PLCG2,PIK3CD,STAT1,PDGFA,PIK3C2G,PIK3C3
iNOS Signaling	2.76E00	2.09E-01	3.000	JUN,NFKB2,IRF1,IFNGR1,NFKB1,CD14,STAT1,MAPK13,JAK3
IGF-1 Signaling	2.76E00	1.55E-01	3.162	JUN,IGFBP4,PIK3R3,PIK3C2A,PIK3C2B,IGFBP5,PIK3R1,YWHAH,IGF1R,PIK3CD,IGFBP7,PRKAG1,PIK3C2G,PIK3C3,IGFBP6
Growth Hormone Signaling	2.75E00	1.74E-01	3.317	IGF1R,PIK3R3,PIK3CD,PIK3C2A,STAT1,GHR,RPS6KA1,PIK3C2B,PIK3R1,PIK3C3,PIK3C2G,PLCG2
Role of Tissue Factor in Cancer	2.75E00	1.5E-01		LIMK2,PIK3R3,ITGB5,PIK3C2A,PIK3C2B,EGR1,PIK3R1,ARRB2,FRK,PIK3CD,MAPK13,RPS6KA1,CASP3,PIK3C2G,PIK3C3,LYN
TNFR2 Signaling	2.72E00	2.5E-01	0.816	JUN,NFKB2,TANK,NAIP,NFKB1,TNFRSF1B,XIAP
Role of PI3K/AKT Signaling in the Pathogenesis of Influenza	2.7E00	1.8E-01		NFKB2,NFKB1,PIK3R3,PIK3CD,PIK3C2A,CCL5,PIK3C2B,PIK3R1,PLAC8,PIK3C3,PIK3C2G
B Cell Receptor Signaling	2.68E00	1.29E-01		JUN,NFKB1,PIK3R3,PIK3C2A,MAP3K12,PIK3C2B,EGR1,PIK3R1,RAC2,VAV1,PLCG2,NFKB2,FCGR2B,PIK3CD,PIK3AP1,MAPK13,PTPRC,NFAT5,BLNK,PIK3C2G,PIK3C3,LYN
Regulation of the Epithelial-Mesenchymal Transition Pathway	2.67E00	1.26E-01		NFKB1,PIK3R3,PIK3C2A,MMP2,CLDN3,SMO,JAK3,ZEB1,ZEB2,PIK3C2B,EGR1,PIK3R1,NOTCH2,FGFRL1,NFKB2,NCSTN,TGFBR2,PIK3CD,FZD1,TCF7L2,BCL9,PIK3C2G,PIK3C3
GM-CSF Signaling	2.64E00	1.77E-01	2.714	PIK3R3,PIK3CD,PIK3C2A,STAT1,CSF2RA,PIK3C2B,CISH,PIK3R1,PIK3C3,PIK3C2G,LYN
Role of p14/p19ARF in Tumor Suppression	2.63E00	2.41E-01	-2.646	PIK3R3,PIK3CD,PIK3C2A,PIK3C2B,PIK3R1,PIK3C3,PIK3C2G
Epithelial Adherens Junction Signaling	2.55E00	1.33E-01		IQGAP1,ARPC3,VCL,TUBB,TGFBR3,PVRL2,LMO7,MYH10,MYL9,ACTA2,CTNND1,NOTCH2,MYL6,MYH14,TGFBR2,ACTB,ARPC4,MYH11,TCF7L2
LPS-stimulated MAPK Signaling	2.54E00	1.64E-01	2.887	JUN,NFKB2,NFKB1,PIK3R3,PIK3CD,PIK3C2A,CD14,MAPK13,PIK3C2B,PIK3R1,PIK3C3,PIK3C2G
NF-κB Activation by Viruses	2.54E00	1.64E-01	3.464	NFKB2,NFKB1,ITGAL,PIK3R3,PIK3CD,ITGB5,PIK3C2A,PIK3C2B,ITGA4,PIK3R1,PIK3C3,PIK3C2G
STAT3 Pathway	2.54E00	1.64E-01		IGF1R,BMPR1A,TGFBR2,PDGFRA,KIAA1804,GHR,TGFBR3,MAPK13,DDR1,MAP3K12,CISH,FGFRL1
Thrombopoietin Signaling	2.53E00	1.82E-01	3.162	JUN,PIK3R3,PIK3CD,PIK3C2A,STAT1,PIK3C2B,PIK3R1,PIK3C3,PIK3C2G,PLCG2
Thrombin Signaling	2.52E00	1.23E-01	4.264	ITPR2,NFKB1,ARHGEF3,PIK3R3,PIK3C2A,ADCY7,MYL12A,PIK3C2B,RHOC,PLCE1,MYL9,PIK3R1,PLCG2,NFKB2,MYL6,PIK3CD,GNB5,MAPK13,PLCH2,ITPR1,ARHGEF4,PIK3C2G,PIK3C3
Xenobiotic Metabolism Signaling	2.48E00	1.13E-01		CYP3A7,PIK3C2A,FMO1,PIK3R1,ALDH3A2,FMO5,PIK3CD,CAT,CYP1B1,PIK3C3,PIK3C2G,GCLC,NFKB1,PIK3R3,ABCC2,UGT2B7,UGT2B10,GSTM3,MAP3K12,PIK3C2B,CES1,MGST1,SULT1C2,NFKB2,SOD3,MAPK13,GSTM4,MAOB,NFE2L2
Angiopoietin Signaling	2.47E00	1.69E-01	1.000	NFKB2,NFKB1,PIK3R3,PIK3CD,PIK3C2A,PIK3C2B,TNIP1,PIK3R1,PIK3C3,PIK3C2G,GRB7
Mouse Embryonic Stem Cell Pluripotency	2.46E00	1.49E-01	3.207	PIK3R3,PIK3C2A,SMO,JAK3,PIK3C2B,PIK3R1,BMPR1A,PIK3CD,FZD1,MAPK13,XIAP,TCF7L2,PIK3C2G,PIK3C3
Cytotoxic T Lymphocyte-mediated Apoptosis of Target Cells	2.45E00	2.26E-01	2.236	HLA-A,APAF1,CASP3,B2M,FCER1G,CASP8,CASP7
ErbB Signaling	2.42E00	1.53E-01		JUN,PIK3R3,PIK3C2A,PIK3C2B,PIK3R1,PLCG2,PIK3CD,NCK2,MAPK13,ERBB2,ERBB3,PIK3C2G,PIK3C3
Ephrin A Signaling	2.42E00	1.88E-01		PIK3R3,PIK3CD,PIK3C2A,PIK3C2B,EFNA1,PIK3R1,VAV1,PIK3C3,PIK3C2G
Tumoricidal Function of Hepatic Natural Killer Cells	2.4E00	2.5E-01	2.236	ITGAL,APAF1,CASP3,BAX,CASP8,CASP7
14-3-3-mediated Signaling	2.39E00	1.38E-01		JUN,PIK3R3,PIK3C2A,TUBB,PIK3C2B,PLCE1,PIK3R1,YWHAH,PLCG2,VIM,PIK3CD,PLCH2,RPS6KA1,BAX,PIK3C2G,PIK3C3
Role of PKR in Interferon Induction and Antiviral Response	2.38E00	2E-01		NFKB2,IRF1,NFKB1,APAF1,TLR3,STAT1,CASP3,CASP8
T Cell Receptor Signaling	2.38E00	1.46E-01		JUN,NFKB1,PIK3R3,PIK3C2A,PIK3C2B,PIK3R1,VAV1,NFKB2,LCP2,PIK3CD,PTPRC,NFAT5,PIK3C2G,PIK3C3
Inhibition of Angiogenesis by TSP1	2.37E00	2.19E-01	2.236	JUN,CD47,TGFBR2,SDC2,MAPK13,CASP3,THBS1
Erythropoietin Signaling	2.37E00	1.64E-01		JUN,NFKB2,NFKB1,PIK3R3,PIK3CD,PIK3C2A,PIK3C2B,PIK3R1,PIK3C3,PIK3C2G,PLCG2
Agrin Interactions at Neuromuscular Junction	2.37E00	1.64E-01	3.000	JUN,ITGAL,CTTN,ACTB,LAMB1,ERBB2,ITGA4,ACTA2,ERBB3,RAC2,LAMA2
CNTF Signaling	2.36E00	1.84E-01	3.000	PIK3R3,PIK3CD,PIK3C2A,STAT1,RPS6KA1,PIK3C2B,PIK3R1,PIK3C3,PIK3C2G
Gα12/13 Signaling	2.35E00	1.37E-01	3.500	JUN,LPAR6,NFKB1,PIK3R3,PIK3C2A,MYL12A,PIK3C2B,MYL9,PIK3R1,VAV1,NFKB2,MYL6,PIK3CD,CDH11,PIK3C2G,PIK3C3
GDNF Family Ligand-Receptor Interactions	2.32E00	1.62E-01	3.000	JUN,ITPR2,PIK3R3,PIK3CD,PIK3C2A,PIK3C2B,ITPR1,PIK3R1,PIK3C3,PIK3C2G,PLCG2
HMGB1 Signaling	2.32E00	1.36E-01	4.000	JUN,NFKB1,PIK3R3,PIK3C2A,TNFRSF1B,PIK3C2B,RHOC,PIK3R1,VCAM1,NFKB2,IFNGR1,PIK3CD,HAT1,MAPK13,PIK3C2G,PIK3C3
p70S6K Signaling	2.32E00	1.36E-01	3.873	PIK3R3,PIK3C2A,PIK3C2B,PLCE1,PIK3R1,PLD1,YWHAH,IL2RG,PLCG2,AGT,PIK3CD,PLCH2,IL4R,PIK3C2G,PIK3C3,LYN
P2Y Purigenic Receptor Signaling Pathway	2.32E00	1.36E-01	3.873	JUN,NFKB1,PIK3R3,PIK3C2A,ADCY7,PIK3C2B,PLCE1,PIK3R1,PLCG2,NFKB2,PIK3CD,GNB5,PLCH2,PRKAG1,PIK3C2G,PIK3C3
CXCR4 Signaling	2.28E00	1.26E-01	3.771	JUN,ITPR2,PIK3R3,PIK3C2A,ADCY7,MYL12A,PIK3C2B,RHOC,EGR1,MYL9,PIK3R1,MYL6,CXCR4,PIK3CD,GNB5,ITPR1,PIK3C2G,PIK3C3,LYN
Aldosterone Signaling in Epithelial Cells	2.28E00	1.26E-01		ITPR2,PIK3R3,PIK3C2A,PIK3C2B,PLCE1,DNAJC4,HSPA4L,PIK3R1,PLCG2,PIK3CD,DNAJC9,SGK1,HSPA8,PLCH2,ITPR1,DNAJC22,HSPH1,PIK3C2G,PIK3C3
Gap Junction Signaling	2.28E00	1.26E-01		ITPR2,PIK3R3,PIK3C2A,NPR1,TUBB,ADCY7,PIK3C2B,PLCE1,ACTA2,PIK3R1,PLCG2,PIK3CD,ACTB,PLCH2,ITPR1,PRKAG1,PIK3C2G,PIK3C3,NPR2
Fc Epsilon RI Signaling	2.27E00	1.38E-01	3.873	PIK3R3,PIK3C2A,PLA2G1B,PIK3C2B,FCER1G,PIK3R1,RAC2,VAV1,PLCG2,LCP2,PIK3CD,MAPK13,PIK3C2G,PIK3C3,LYN
Neuropathic Pain Signaling In Dorsal Horn Neurons	2.25E00	1.41E-01	3.742	ITPR2,PIK3R3,PIK3C2A,PIK3C2B,PLCE1,PIK3R1,PLCG2,GRIA3,PIK3CD,PLCH2,ITPR1,PRKAG1,PIK3C2G,PIK3C3
Antiproliferative Role of Somatostatin Receptor 2	2.25E00	1.67E-01	2.646	PIK3R3,PIK3CD,PIK3C2A,NPR1,GNB5,PIK3C2B,PIK3R1,PIK3C3,PIK3C2G,NPR2
RhoA Signaling	2.25E00	1.33E-01	3.357	LPAR6,LIMK2,ARPC3,MYL12A,MSN,MYL9,ACTA2,PLD1,RAPGEF6,IGF1R,MYL6,ACTB,ARPC4,ARHGAP4,RTKN,PFN2
Cardiac Hypertrophy Signaling	2.23E00	1.14E-01	4.899	JUN,PIK3C2A,CHP1,PLCE1,RHOC,PIK3R1,PIK3CD,PIK3C3,PIK3C2G,PIK3R3,ADCY7,MYL12A,MAP3K12,PIK3C2B,MYL9,PLCG2,IGF1R,MYL6,TGFBR2,GNB5,MAPK13,PLCH2,RPS6KA1,PRKAG1,ADRA2A
HIF1α Signaling	2.22E00	1.4E-01		JUN,PIK3R3,PIK3C2A,MMP2,PIK3C2B,PIK3R1,SLC2A5,PIK3CD,MAPK13,EDN1,MMP15,PIK3C2G,PIK3C3,MMP14
Ceramide Signaling	2.21E00	1.5E-01	-0.577	JUN,NFKB2,NFKB1,PIK3R3,PIK3CD,SMPD2,PIK3C2A,TNFRSF1B,PIK3C2B,PIK3R1,PIK3C3,PIK3C2G
FLT3 Signaling in Hematopoietic Progenitor Cells	2.17E00	1.55E-01		PIK3R3,PIK3CD,PIK3C2A,STAT1,MAPK13,FLT3LG,RPS6KA1,PIK3C2B,PIK3R1,PIK3C3,PIK3C2G
Glioblastoma Multiforme Signaling	2.13E00	1.24E-01	4.243	ITPR2,PIK3R3,PIK3C2A,PDGFRA,SMO,PIK3C2B,RHOC,PLCE1,PIK3R1,PLCG2,IGF1R,PIK3CD,FZD1,PLCH2,ITPR1,PDGFA,PIK3C2G,PIK3C3
IL-15 Production	2.13E00	2.22E-01		NFKB2,IRF1,NFKB1,STAT1,JAK3,FRK
UVB-Induced MAPK Signaling	2.13E00	1.7E-01	3.000	JUN,PIK3R3,PIK3CD,PIK3C2A,MAPK13,PIK3C2B,PIK3R1,PIK3C3,PIK3C2G
Graft-versus-Host Disease Signaling	2.12E00	1.82E-01		HLA-E,HLA-A,HLA-DQA1,HLA-DQB1,HLA-DRB5,FCER1G,IL33,HLA-DRA
Huntington's Disease Signaling	2.09E00	1.11E-01		JUN,IFT57,PIK3C2A,APAF1,PENK,PIK3R1,PIK3CD,HSPA8,ITPR1,CASP2,PIK3C3,PIK3C2G,CASP7,PIK3R3,CAPN1,PIK3C2B,PSME1,CPLX2,IGF1R,SGK1,GNB5,CAPN6,CASP3,BAX,CASP8
Prolactin Signaling	2.08E00	1.51E-01	3.317	JUN,IRF1,PIK3R3,PIK3CD,PIK3C2A,STAT1,PIK3C2B,PIK3R1,PIK3C3,PIK3C2G,PLCG2
Choline Biosynthesis III	2.07E00	3.08E-01		NAPEPLD,PLD3,PLD4,PLD1
HGF Signaling	2.07E00	1.35E-01	3.317	JUN,PIK3R3,PIK3C2A,MAP3K12,PIK3C2B,PIK3R1,ELF3,PLCG2,ELF1,PIK3CD,ELF4,ITGA4,PIK3C2G,PIK3C3
Antioxidant Action of Vitamin C	2.05E00	1.38E-01	-3.464	NFKB1,PLD3,CSF2RA,PLA2G1B,PLCE1,PLD4,PLD1,SLC2A5,PLCG2,NFKB2,NAPEPLD,MAPK13,PLCH2
Melanocyte Development and Pigmentation Signaling	2.04E00	1.43E-01	3.464	PIK3R3,PIK3CD,PIK3C2A,ADCY7,RPS6KA1,PIK3C2B,KIT,PIK3R1,PRKAG1,PIK3C3,PIK3C2G,PLCG2
IL-6 Signaling	2.02E00	1.29E-01	3.606	JUN,NFKB1,PIK3R3,PIK3C2A,CD14,TNFRSF1B,PIK3C2B,COL1A1,PIK3R1,NFKB2,PIK3CD,MAPK13,PIK3C2G,IL33,PIK3C3
Non-Small Cell Lung Cancer Signaling	2E00	1.54E-01	3.162	ITPR2,PIK3R3,PIK3CD,PIK3C2A,ERBB2,PIK3C2B,ITPR1,PIK3R1,PIK3C3,PIK3C2G
NGF Signaling	2E00	1.32E-01	3.742	NFKB1,SMPD2,PIK3R3,PIK3C2A,MAP3K12,PIK3C2B,PIK3R1,PLCG2,NFKB2,PIK3CD,RPS6KA1,BAX,PIK3C2G,PIK3C3
Telomerase Signaling	1.98E00	1.35E-01	3.464	PIK3R3,PIK3C2A,IL2RB,PIK3C2B,PIK3R1,ELF3,IL2RG,ELF1,PIK3CD,TINF2,ELF4,PIK3C2G,PIK3C3
Sonic Hedgehog Signaling	1.97E00	2.07E-01		DYRK1B,SMO,GLI1,PRKAG1,ARRB2,STK36
LPS/IL-1 Mediated Inhibition of RXR Function	1.96E00	1.11E-01	-0.333	HMGCS2,JUN,CYP3A7,ABCC2,CD14,TNFRSF1B,GSTM3,FMO1,PAPSS2,MGST1,SULT1C2,ALDH3A2,FMO5,SOD3,XPO1,ACSL1,ACSL5,CAT,GSTM4,APOE,MAOB,PLTP,IL33
ERK/MAPK Signaling	1.93E00	1.13E-01	3.578	PIK3R3,PIK3C2A,PLA2G1B,MKNK2,PIK3C2B,PIK3R1,RAC2,ELF3,YWHAH,PLCG2,ELF1,PIK3CD,STAT1,ELF4,RPS6KA1,ITGA4,DUSP6,PPP1R3A,PRKAG1,PIK3C2G,PIK3C3
Regulation of Actin-based Motility by Rho	1.92E00	1.38E-01	3.464	MYL6,ARPC3,ACTB,ARPC4,MYL12A,RHOC,ITGA4,MYL9,WIPF1,ACTA2,RAC2,PFN2
Glutathione Biosynthesis	1.9E00	6.67E-01		GCLC,GSS
Role of NFAT in Cardiac Hypertrophy	1.9E00	1.14E-01	4.359	ITPR2,PIK3R3,PIK3C2A,ADCY7,CHP1,SLC8A1,PIK3C2B,PLCE1,PIK3R1,PLCG2,IGF1R,TGFBR2,PIK3CD,GNB5,MAPK13,PLCH2,ITPR1,PRKAG1,PIK3C2G,PIK3C3
Allograft Rejection Signaling	1.89E00	1.67E-01		HLA-E,HLA-A,HLA-DQA1,HLA-DQB1,HLA-DRB5,B2M,FCER1G,HLA-DRA
Human Embryonic Stem Cell Pluripotency	1.89E00	1.22E-01		PIK3R3,PIK3C2A,PDGFRA,SMO,PIK3C2B,PIK3R1,FGFRL1,BMPR1A,TGFBR2,PIK3CD,FZD1,BMP1,TCF7L2,PDGFA,PIK3C2G,PIK3C3
PPARα/RXRα Activation	1.88E00	1.15E-01	-3.357	JUN,ACADL,NFKB1,ITGB5,ADCY7,TGFBR3,FASN,PRKAB1,PLCE1,HELZ2,PLCG2,NFKB2,TGFBR2,GHR,PLCH2,ADIPOR2,PRKAG1,PRKAB2,GPD2
ErbB4 Signaling	1.87E00	1.55E-01	2.828	NCSTN,PIK3R3,PIK3CD,PIK3C2A,PIK3C2B,PIK3R1,PIK3C3,PIK3C2G,PLCG2
IL-10 Signaling	1.87E00	1.47E-01		JUN,NFKB2,NFKB1,FCGR2B,CD14,ARG2,MAPK13,IL4R,BLVRB,IL33
γ-glutamyl Cycle	1.84E00	2.67E-01		GCLC,OPLAH,ANPEP,GSS
Retinoic acid Mediated Apoptosis Signaling	1.83E00	1.53E-01	3.000	PARP10,PARP12,IRF1,PARP4,APAF1,ZC3HAV1,PARP3,CASP3,CASP8
Nicotine Degradation II	1.79E00	1.6E-01		POR,FMO5,CYP3A7,UGT2B7,UGT2B10,FMO1,CYP2S1,CYP1B1
Activation of IRF by Cytosolic Pattern Recognition Receptors	1.78E00	1.5E-01	1.667	JUN,NFKB2,TANK,IRF9,NFKB1,STAT1,IFIH1,ADAR,DDX58
Cellular Effects of Sildenafil (Viagra)	1.77E00	1.21E-01		ITPR2,ADCY7,MYL12A,PLCE1,MYH10,MYL9,ACTA2,PLCG2,MYL6,MYH14,ACTB,MYH11,PLCH2,ITPR1,PRKAG1
Altered T Cell and B Cell Signaling in Rheumatoid Arthritis	1.76E00	1.36E-01		NFKB2,NFKB1,TLR3,CXCL13,HLA-DQA1,HLA-DQB1,HLA-DRB5,FCER1G,SPP1,IL33,HLA-DRA
IL-3 Signaling	1.74E00	1.41E-01		JUN,PIK3R3,PIK3CD,PIK3C2A,STAT1,CHP1,PIK3C2B,PIK3R1,PIK3C3,PIK3C2G
Small Cell Lung Cancer Signaling	1.74E00	1.41E-01		NFKB2,NFKB1,PIK3R3,PIK3CD,PIK3C2A,APAF1,PIK3C2B,PIK3R1,PIK3C3,PIK3C2G
Nur77 Signaling in T Lymphocytes	1.74E00	1.57E-01		APAF1,HLA-DQA1,HLA-DQB1,HLA-DRB5,CHP1,CASP3,FCER1G,HLA-DRA
Role of JAK1, JAK2 and TYK2 in Interferon Signaling	1.73E00	2.08E-01		NFKB2,IFNGR1,NFKB1,IFNAR2,STAT1
Melanoma Signaling	1.72E00	1.67E-01		PIK3R3,PIK3CD,PIK3C2A,PIK3C2B,PIK3R1,PIK3C3,PIK3C2G
Autoimmune Thyroid Disease Signaling	1.72E00	1.67E-01		HLA-E,HLA-A,HLA-DQA1,HLA-DQB1,HLA-DRB5,FCER1G,HLA-DRA
RhoGDI Signaling	1.71E00	1.1E-01	-3.771	ARHGEF3,LIMK2,ARPC3,MYL12A,MSN,RHOC,MYL9,ACTA2,CD44,ARHGDIB,MYL6,ARHGEF19,ACTB,GNB5,ARPC4,ARHGAP4,ITGA4,ARHGEF4,CDH11
IL-17 Signaling	1.7E00	1.39E-01		JUN,NFKB1,PIK3R3,PIK3CD,PIK3C2A,MAPK13,PIK3C2B,PIK3R1,PIK3C3,PIK3C2G
Superpathway of Inositol Phosphate Compounds	1.7E00	1.09E-01		PIK3R3,PIK3C2A,PIK3C2B,PLCE1,PLD4,PIK3R1,EPHX2,PLCG2,CILP,PIK3CD,ITPKB,NUDT4,PPP1R13B,PTPRC,PTPN13,SIRPA,PPP1R1B,PIK3C2G,PIK3C3,DUSP16
Endometrial Cancer Signaling	1.7E00	1.54E-01		PIK3R3,PIK3CD,PIK3C2A,ERBB2,PIK3C2B,PIK3R1,PIK3C3,PIK3C2G
Ethanol Degradation IV	1.64E00	2.35E-01		ALDH3A2,ACSL1,ACSS2,CAT
Arsenate Detoxification I (Glutaredoxin)	1.62E00	5E-01		PNP,AS3MT
Creatine-phosphate Biosynthesis	1.62E00	5E-01		CKB,CKMT1A/CKMT1B
Arginine Degradation I (Arginase Pathway)	1.62E00	5E-01		OAT,ARG2
TR/RXR Activation	1.62E00	1.29E-01		UCP2,PIK3R3,PIK3CD,PIK3C2A,COL6A3,SYT12,FASN,PIK3C2B,PIK3R1,PIK3C3,PIK3C2G
Phospholipases	1.6E00	1.48E-01		NAPEPLD,PLD3,PLA2G1B,PLCH2,PLCE1,PLD4,PLD1,PLCG2
Role of Macrophages, Fibroblasts and Endothelial Cells in Rheumatoid Arthritis	1.59E00	9.76E-02		JUN,PIK3C2A,SMO,CHP1,SFRP1,PLCE1,PIK3R1,VCAM1,SFRP5,FN1,PIK3CD,FZD1,LRP1,NFAT5,TCF7L2,PIK3C3,PIK3C2G,IL33,NFKB1,CEBPD,PIK3R3,CCL5,TNFRSF1B,PIK3C2B,PLCG2,TLR3,PLCH2,PDGFA
IL-17A Signaling in Fibroblasts	1.59E00	1.71E-01		JUN,NFKB2,NFKB1,CEBPD,MAPK13,NFKBIZ
Natural Killer Cell Signaling	1.58E00	1.2E-01		PIK3R3,PIK3C2A,PIK3C2B,FCER1G,PIK3R1,RAC2,VAV1,PLCG2,LCP2,PIK3CD,TYROBP,PIK3C2G,PIK3C3
Wnt/Ca+ pathway	1.56E00	1.45E-01	2.828	NFKB2,NFKB1,FZD1,SMO,PLCH2,PLCE1,NFAT5,PLCG2
CTLA4 Signaling in Cytotoxic T Lymphocytes	1.55E00	1.26E-01		LCP2,PIK3R3,HLA-A,PIK3CD,PIK3C2A,PIK3C2B,B2M,FCER1G,PIK3R1,PIK3C3,PIK3C2G
Relaxin Signaling	1.55E00	1.14E-01		JUN,NFKB1,PIK3R3,PIK3C2A,NPR1,ADCY7,PIK3C2B,PIK3R1,NFKB2,PIK3CD,GNB5,PRKAG1,PIK3C2G,PIK3C3,NPR2
Estrogen Biosynthesis	1.53E00	1.67E-01		POR,CYP3A7,HSD17B4,HSD17B12,CYP2S1,CYP1B1
Primary Immunodeficiency Signaling	1.52E00	1.52E-01		TAP2,JAK3,PTPRC,BLNK,TAP1,IL2RG,CIITA
CREB Signaling in Neurons	1.51E00	1.07E-01	4.123	ITPR2,PIK3R3,GRIK5,PIK3C2A,ADCY7,PIK3C2B,PLCE1,PIK3R1,PLCG2,GRIA3,PIK3CD,GNB5,PLCH2,RPS6KA1,ITPR1,PRKAG1,PIK3C2G,PIK3C3
Neurotrophin/TRK Signaling	1.5E00	1.34E-01	3.000	JUN,PIK3R3,PIK3CD,PIK3C2A,RPS6KA1,PIK3C2B,PIK3R1,PIK3C3,PIK3C2G
VEGF Signaling	1.48E00	1.24E-01	2.714	PIK3R3,PIK3CD,PIK3C2A,VCL,ACTB,PIK3C2B,ACTA2,PIK3R1,PIK3C3,PIK3C2G,PLCG2
Protein Kinase A Signaling	1.48E00	9.19E-02		ITPR2,AKAP13,CDC14B,SMO,CHP1,PLCE1,YWHAH,CREM,ITPR1,NFAT5,TCF7L2,PTPN13,SIRPA,PPP1R1B,PTPRS,DUSP16,NFKB1,FLNA,ADCY7,MYL12A,MYH10,MYL9,ADD3,PLCG2,NFKB2,MYL6,TGFBR2,GNB5,PLCH2,PTPLA,DUSP6,PTPRC,PPP1R3A,PRKAG1
Notch Signaling	1.48E00	1.62E-01	1.000	NCSTN,DTX3,DTX4,FURIN,NOTCH2,NUMBL
3-phosphoinositide Biosynthesis	1.47E00	1.09E-01		PIK3R3,PIK3C2A,PIK3C2B,PIK3R1,EPHX2,CILP,PIK3CD,NUDT4,PPP1R13B,PTPRC,PTPN13,SIRPA,PPP1R1B,PIK3C2G,PIK3C3,DUSP16
B Cell Development	1.46E00	1.79E-01		HLA-DQA1,HLA-DQB1,HLA-DRB5,PTPRC,HLA-DRA
CCR3 Signaling in Eosinophils	1.44E00	1.15E-01		ITPR2,LIMK2,PIK3R3,PIK3C2A,PLA2G1B,PIK3C2B,PIK3R1,PIK3CD,GNB5,MAPK13,ITPR1,PIK3C2G,PIK3C3
Calcium-induced T Lymphocyte Apoptosis	1.44E00	1.38E-01	2.646	ITPR2,HLA-DQA1,HLA-DQB1,HLA-DRB5,CHP1,ITPR1,FCER1G,HLA-DRA
Inhibition of Matrix Metalloproteases	1.43E00	1.58E-01		MMP2,THBS2,SDC2,LRP1,MMP15,MMP14
Tetrapyrrole Biosynthesis II	1.42E00	4E-01		UROS,ALAD
Galactose Degradation I (Leloir Pathway)	1.42E00	4E-01		GALE,GALM
Acetate Conversion to Acetyl-CoA	1.42E00	4E-01		ACSL1,ACSS2
Fatty Acid β-oxidation I	1.4E00	1.72E-01		ACAA2,ACSL1,ACSL5,HSD17B4,HADHA
Chronic Myeloid Leukemia Signaling	1.39E00	1.2E-01		NFKB2,TGFBR2,NFKB1,PIK3R3,PIK3CD,PIK3C2A,MECOM,PIK3C2B,PIK3R1,PIK3C3,PIK3C2G
Netrin Signaling	1.38E00	1.54E-01		NCK2,CHP1,ABLIM1,NFAT5,PRKAG1,RAC2
SAPK/JNK Signaling	1.37E00	1.18E-01	3.317	JUN,PIK3R3,PIK3CD,PIK3C2A,MAP3K12,PIK3C2B,FCER1G,PIK3R1,RAC2,PIK3C3,PIK3C2G
Glioma Signaling	1.34E00	1.17E-01	3.317	IGF1R,PIK3R3,PIK3CD,PIK3C2A,PDGFRA,PIK3C2B,PIK3R1,PDGFA,PIK3C3,PIK3C2G,PLCG2
Neuroprotective Role of THOP1 in Alzheimer's Disease	1.33E00	1.5E-01		AGT,HLA-E,HLA-A,SERPINA3,APP,PRKAG1
Ovarian Cancer Signaling	1.31E00	1.08E-01		PIK3R3,PIK3C2A,MMP2,SMO,PIK3C2B,PIK3R1,CD44,PIK3CD,FZD1,EDN1,TCF7L2,PRKAG1,PIK3C2G,PIK3C3
Nitric Oxide Signaling in the Cardiovascular System	1.31E00	1.16E-01	3.162	ITPR2,PIK3R3,PIK3CD,PIK3C2A,ARG2,PIK3C2B,ITPR1,PIK3R1,PRKAG1,PIK3C3,PIK3C2G
CD27 Signaling in Lymphocytes	1.3E00	1.37E-01		JUN,NFKB2,NFKB1,APAF1,MAP3K12,CASP3,CASP8
Guanosine Nucleotides Degradation III	1.3E00	2.31E-01		PNP,NT5E,XDH
Role of RIG1-like Receptors in Antiviral Innate Immunity	1.29E00	1.46E-01	2.449	NFKB2,TANK,NFKB1,IFIH1,DDX58,CASP8
MIF Regulation of Innate Immunity	1.29E00	1.46E-01	2.449	JUN,NFKB2,NFKB1,CD74,CD14,PLA2G1B
FGF Signaling	1.27E00	1.18E-01	3.162	PIK3R3,PIK3CD,PIK3C2A,MAPK13,PIK3C2B,ITPR1,PIK3R1,PIK3C3,PIK3C2G,FGFRL1
Superpathway of Melatonin Degradation	1.27E00	1.35E-01		POR,CYP3A7,UGT2B7,UGT2B10,CYP2S1,MAOB,CYP1B1
AMPK Signaling	1.26E00	1.06E-01	3.051	PIK3R3,PIK3C2A,FASN,PIK3C2B,PRKAB1,HLTF,PIK3R1,PIK3CD,MAPK13,PRKAG1,ADRA2A,PIK3C2G,PIK3C3,PRKAB2
Arginine Degradation VI (Arginase 2 Pathway)	1.26E00	3.33E-01		OAT,ARG2
Superoxide Radicals Degradation	1.26E00	3.33E-01		SOD3,CAT
UDP-N-acetyl-D-glucosamine Biosynthesis II	1.26E00	3.33E-01		GFPT2,UAP1
PXR/RXR Activation	1.26E00	1.27E-01		ALDH3A2,HMGCS2,CYP3A7,ABCC2,SCD,PAPSS2,HNF4A,PRKAG1
Role of NANOG in Mammalian Embryonic Stem Cell Pluripotency	1.25E00	1.1E-01	2.828	BMPR1A,PIK3R3,PIK3CD,PIK3C2A,FZD1,BMP1,SMO,JAK3,PIK3C2B,PIK3R1,PIK3C3,PIK3C2G
Systemic Lupus Erythematosus Signaling	1.24E00	9.66E-02		JUN,HLA-E,PIK3R3,PIK3C2A,PIK3C2B,FCER1G,PIK3R1,RNPC3,PLCG2,CREM,HLA-A,FCGR2B,PIK3CD,PTPRC,NFAT5,LSM3,PIK3C2G,IL33,PIK3C3,LYN
Urate Biosynthesis/Inosine 5'-phosphate Degradation	1.22E00	2.14E-01		PNP,NT5E,XDH
Colanic Acid Building Blocks Biosynthesis	1.22E00	2.14E-01		PMM1,GALE,GMDS
VEGF Family Ligand-Receptor Interactions	1.2E00	1.18E-01	3.000	PIK3R3,PIK3CD,PIK3C2A,PLA2G1B,PIK3C2B,PIK3R1,PIK3C3,PIK3C2G,PLCG2
MIF-mediated Glucocorticoid Regulation	1.19E00	1.52E-01	2.236	NFKB2,NFKB1,CD74,CD14,PLA2G1B
Thiamin Salvage III	1.18E00	1E00		TPK1
Glutamine Biosynthesis I	1.18E00	1E00		GLUL
Xanthine and Xanthosine Salvage	1.18E00	1E00		PNP
Sorbitol Degradation I	1.18E00	1E00		SORD
Sulfite Oxidation IV	1.18E00	1E00		SUOX
UDP-N-acetyl-D-galactosamine Biosynthesis I	1.18E00	1E00		GALE
Hereditary Breast Cancer Signaling	1.17E00	1.07E-01		PIK3R3,PIK3CD,PIK3C2A,RFC2,ATR,FANCG,PIK3C2B,HLTF,PIK3R1,WEE1,PIK3C3,PIK3C2G
VDR/RXR Activation	1.17E00	1.17E-01		CCL5,THBD,S100G,CD14,SEMA3B,IGFBP5,SPP1,PDGFA,IGFBP6
Nicotine Degradation III	1.16E00	1.36E-01		POR,CYP3A7,UGT2B7,UGT2B10,CYP2S1,CYP1B1
Remodeling of Epithelial Adherens Junctions	1.16E00	1.21E-01	2.000	IQGAP1,ARPC3,VCL,ACTB,TUBB,ARPC4,ACTA2,CTNND1
Bupropion Degradation	1.15E00	1.67E-01		POR,CYP3A7,CYP2S1,CYP1B1
Oxidative Ethanol Degradation III	1.14E00	2E-01		ALDH3A2,ACSL1,ACSS2
Coagulation System	1.1E00	1.43E-01	-0.447	PROS1,SERPINA5,THBD,F13A1,VWF
Breast Cancer Regulation by Stathmin1	1.1E00	9.47E-02		ITPR2,ARHGEF3,LIMK2,PIK3R3,PIK3C2A,TUBB,ADCY7,PIK3C2B,PIK3R1,ARHGEF19,PIK3CD,GNB5,ITPR1,PPP1R3A,PRKAG1,ARHGEF4,PIK3C2G,PIK3C3
IL-17A Signaling in Gastric Cells	1.1E00	1.6E-01		JUN,NFKB1,CCL5,MAPK13
Glutathione-mediated Detoxification	1.1E00	1.6E-01		GSTM3,GSTM4,ANPEP,MGST1
Acetone Degradation I (to Methylglyoxal)	1.1E00	1.6E-01		POR,CYP3A7,CYP2S1,CYP1B1
Prostate Cancer Signaling	1.09E00	1.13E-01		NFKB2,NFKB1,PIK3R3,PIK3CD,PIK3C2A,PIK3C2B,PIK3R1,PIK3C3,PIK3C2G
TREM1 Signaling	1.07E00	1.16E-01	2.828	NFKB2,NFKB1,FCGR2B,TLR3,NLRC5,TYROBP,PLCG2,CIITA
Renal Cell Carcinoma Signaling	1.07E00	1.16E-01	2.828	JUN,PIK3R3,PIK3CD,PIK3C2A,PIK3C2B,PIK3R1,PIK3C3,PIK3C2G
Granzyme B Signaling	1.07E00	1.88E-01		APAF1,CASP3,CASP8
Extrinsic Prothrombin Activation Pathway	1.07E00	1.88E-01		PROS1,THBD,F13A1
Adenosine Nucleotides Degradation II	1.07E00	1.88E-01		PNP,NT5E,XDH
Melatonin Degradation I	1.05E00	1.28E-01		POR,CYP3A7,UGT2B7,UGT2B10,CYP2S1,CYP1B1
Communication between Innate and Adaptive Immune Cells	1.04E00	1.1E-01		HLA-E,HLA-A,TLR3,CCL5,HLA-DRB5,B2M,FCER1G,IL33,HLA-DRA
Citrulline Biosynthesis	1.03E00	2.5E-01		OAT,ARG2
Sphingomyelin Metabolism	1.03E00	2.5E-01		SMPD2,SGMS2
Corticotropin Releasing Hormone Signaling	1.01E00	1.03E-01		JUN,ITPR2,NPR1,ADCY7,SMO,MAPK13,GLI1,ITPR1,PRKAG1,NPR2,PLCG2
Glutathione Redox Reactions I	1.01E00	1.76E-01		GPX3,GPX2,MGST1
Calcium Signaling	1.01E00	9.41E-02	1.667	ITPR2,CHP1,SLC8A1,MYH10,MYL9,ACTA2,MYL6,TPM3,MYH14,GRIA3,MYH11,ITPR1,ASPH,NFAT5,PRKAG1,PNCK
Cell Cycle Control of Chromosomal Replication	1E00	1.48E-01		MCM3,MCM6,MCM4,MCM5
Cell Cycle: G2/M DNA Damage Checkpoint Regulation	9.87E-01	1.22E-01	0.447	TOP2A,ATR,RPS6KA1,HIPK2,YWHAH,WEE1
April Mediated Signaling	9.84E-01	1.32E-01	2.236	JUN,NFKB2,NFKB1,MAPK13,NFAT5
Ephrin Receptor Signaling	9.74E-01	9.3E-02		LIMK2,ITSN1,EPHB3,ARPC3,SDC2,WIPF1,RAC2,CXCR4,GNB5,NCK2,ARPC4,EFNA1,ITGA4,PTPN13,PDGFA,PIK3C2G
Sertoli Cell-Sertoli Cell Junction Signaling	9.58E-01	9.25E-02		JUN,TUBB,CLDN3,TGFBR3,PVRL2,TJP2,MAP3K12,CLDN4,ACTA2,RAB8B,ACTB,PLS1,MAPK13,TJP3,ITGA4,PRKAG1
Amyloid Processing	9.55E-01	1.2E-01	2.000	NCSTN,CAPN6,CAPN1,MAPK13,APP,PRKAG1
Neuregulin Signaling	9.39E-01	1.05E-01	2.121	PIK3R3,ERBB2,DCN,ITGA4,PIK3R1,ERRFI1,ERBB3,PLCG2,GRB7
BMP signaling pathway	9.38E-01	1.08E-01		JUN,NFKB2,BMPR1A,NFKB1,BMP1,MAPK13,XIAP,PRKAG1
Prostanoid Biosynthesis	9.37E-01	2.22E-01		PTGIS,TBXAS1
Heme Biosynthesis II	9.37E-01	2.22E-01		UROS,ALAD
UDP-N-acetyl-D-galactosamine Biosynthesis II	9.37E-01	2.22E-01		GALE,UAP1
B Cell Activating Factor Signaling	9.12E-01	1.25E-01	2.236	JUN,NFKB2,NFKB1,MAPK13,NFAT5
Purine Nucleotides Degradation II (Aerobic)	8.95E-01	1.58E-01		PNP,NT5E,XDH
Guanine and Guanosine Salvage I	8.93E-01	5E-01		PNP
Choline Degradation I	8.93E-01	5E-01		CHDH
Taurine Biosynthesis	8.93E-01	5E-01		CDO1
Palmitate Biosynthesis I (Animals)	8.93E-01	5E-01		FASN
Sulfate Activation for Sulfonation	8.93E-01	5E-01		PAPSS2
Glycerol-3-phosphate Shuttle	8.93E-01	5E-01		GPD2
Fatty Acid Biosynthesis Initiation II	8.93E-01	5E-01		FASN
Adenine and Adenosine Salvage I	8.93E-01	5E-01		PNP
GDP-L-fucose Biosynthesis I (from GDP-D-mannose)	8.93E-01	5E-01		GMDS
Role of BRCA1 in DNA Damage Response	8.88E-01	1.09E-01		STAT1,RFC2,ATR,BRE,FANCG,HLTF,MDC1
Wnt/β-catenin Signaling	8.64E-01	9.04E-02	0.535	JUN,TGFBR3,SMO,SFRP1,CD44,SFRP5,AXIN2,TGFBR2,FZD1,SOX9,LRP1,TCF7L2,BCL9,SOX4,TLE4
Ketogenesis	8.59E-01	2E-01		HMGCS2,HADHA
Regulation of IL-2 Expression in Activated and Anergic T Lymphocytes	8.43E-01	1.03E-01		JUN,NFKB2,TGFBR2,NFKB1,CHP1,NFAT5,VAV1,PLCG2
4-1BB Signaling in T Lymphocytes	8.35E-01	1.29E-01	2.000	JUN,NFKB2,NFKB1,MAPK13
mTOR Signaling	8.22E-01	8.79E-02	2.500	PIK3R3,PIK3C2A,PLD3,PIK3C2B,PRKAB1,RHOC,PLD4,PIK3R1,PLD1,PIK3CD,NAPEPLD,RPS6KA1,PRKAG1,PIK3C2G,PIK3C3,PRKAB2
Role of JAK2 in Hormone-like Cytokine Signaling	7.99E-01	1.25E-01		STAT1,GHR,HLTF,SIRPA
Glutaryl-CoA Degradation	7.9E-01	1.82E-01		HSD17B4,HADHA
Chemokine Signaling	7.9E-01	1.03E-01	2.646	JUN,CXCR4,LIMK2,CCL5,MAPK13,PIK3C2G,PLCG2
Actin Nucleation by ARP-WASP Complex	7.84E-01	1.07E-01	2.000	ARPC3,NCK2,ARPC4,RHOC,ITGA4,WIPF1
GPCR-Mediated Integration of Enteroendocrine Signaling Exemplified by an L Cell	7.45E-01	1E-01		ITPR2,ADCY7,PLCH2,PLCE1,ITPR1,PRKAG1,PLCG2
Aryl Hydrocarbon Receptor Signaling	7.36E-01	8.89E-02	2.449	JUN,ALDH3A2,NFKB2,NFKB1,APAF1,GSTM3,ATR,GSTM4,BAX,MGST1,CYP1B1,NFE2L2
Stearate Biosynthesis I (Animals)	7.32E-01	1.18E-01		ACSL1,ACSL5,FASN,HNF4A
Methylglyoxal Degradation I	7.31E-01	3.33E-01		HAGHL
Coenzyme A Biosynthesis	7.31E-01	3.33E-01		PPCDC
1,25-dihydroxyvitamin D3 Biosynthesis	7.31E-01	3.33E-01		POR
Tetrahydrobiopterin Biosynthesis I	7.31E-01	3.33E-01		PTS
Glutathione Redox Reactions II	7.31E-01	3.33E-01		TXNDC12
Tetrahydrobiopterin Biosynthesis II	7.31E-01	3.33E-01		PTS
L-serine Degradation	7.31E-01	3.33E-01		SRR
Mevalonate Pathway I	7.29E-01	1.67E-01		HMGCS2,HADHA
D-myo-inositol-5-phosphate Metabolism	7.21E-01	8.82E-02		NUDT4,PLCE1,PPP1R13B,PTPRC,PLD4,PTPN13,SIRPA,PPP1R1B,EPHX2,DUSP16,PLCG2,CILP
Toll-like Receptor Signaling	7.03E-01	9.72E-02	2.236	JUN,NFKB2,NFKB1,TLR3,CD14,MAPK13,IL33
α-Adrenergic Signaling	6.99E-01	9.41E-02	1.890	ITPR2,GNB5,ADCY7,SLC8A1,ITPR1,ADRA2A,PRKAG1,PLCG2
Ephrin B Signaling	6.82E-01	9.59E-02	2.236	CXCR4,ITSN1,EPHB3,GNB5,NCK2,RAC2,VAV1
Lipid Antigen Presentation by CD1	6.78E-01	1.25E-01		PSAP,B2M,FCER1G
Fatty Acid Activation	6.75E-01	1.54E-01		ACSL1,ACSL5
Bile Acid Biosynthesis, Neutral Pathway	6.75E-01	1.54E-01		AKR1D1,SCP2
PCP pathway	6.45E-01	9.68E-02	2.000	JUN,FZD1,SDC2,SMO,PFN2,SDC3
Factors Promoting Cardiogenesis in Vertebrates	6.27E-01	8.99E-02		BMPR1A,TGFBR2,FZD1,TGFBR3,BMP1,SMO,LRP1,TCF7L2
Superpathway of Citrulline Metabolism	6.27E-01	1.43E-01		OAT,ARG2
Phenylalanine Degradation IV (Mammalian, via Side Chain)	6.27E-01	1.43E-01		ALDH3A2,MAOB
Synaptic Long Term Potentiation	6.22E-01	8.62E-02		ITPR2,GRIA3,CHP1,RPS6KA1,PLCH2,PLCE1,ITPR1,PPP1R3A,PRKAG1,PLCG2
Uracil Degradation II (Reductive)	6.2E-01	2.5E-01		DPYD
Pentose Phosphate Pathway (Oxidative Branch)	6.2E-01	2.5E-01		PGD
Heme Degradation	6.2E-01	2.5E-01		BLVRB
Phenylethylamine Degradation I	6.2E-01	2.5E-01		ALDH3A2
α-tocopherol Degradation	6.2E-01	2.5E-01		CYP4F3
Myo-inositol Biosynthesis	6.2E-01	2.5E-01		IMPA1
Thymine Degradation	6.2E-01	2.5E-01		DPYD
Biotin-carboxyl Carrier Protein Assembly	6.2E-01	2.5E-01		BTD
Melatonin Degradation II	6.2E-01	2.5E-01		MAOB
L-cysteine Degradation I	6.2E-01	2.5E-01		CDO1
Lactose Degradation III	6.2E-01	2.5E-01		GLB1
D-myo-inositol (1,4,5)-Trisphosphate Biosynthesis	6.1E-01	1.15E-01		PLCE1,PLD4,PLCG2
Unfolded protein response	5.64E-01	9.43E-02		CEBPD,HSPA8,HSPH1,VCP,NFE2L2
Synaptic Long Term Depression	5.5E-01	8.15E-02	3.317	IGF1R,ITPR2,GRIA3,NPR1,PLA2G1B,PLCH2,PLCE1,ITPR1,NPR2,PLCG2,LYN
CCR5 Signaling in Macrophages	5.49E-01	8.96E-02		JUN,CCL5,GNB5,MAPK13,FCER1G,PLCG2
Mismatch Repair in Eukaryotes	5.43E-01	1.25E-01		RFC2,POLD1
Tryptophan Degradation X (Mammalian, via Tryptamine)	5.43E-01	1.25E-01		ALDH3A2,MAOB
Putrescine Degradation III	5.43E-01	1.25E-01		ALDH3A2,MAOB
Superpathway of Geranylgeranyldiphosphate Biosynthesis I (via Mevalonate)	5.43E-01	1.25E-01		HMGCS2,HADHA
Parkinson's Signaling	5.43E-01	1.25E-01		MAPK13,CASP3
Mechanisms of Viral Exit from Host Cells	5.42E-01	9.76E-02		VPS37C,XPO1,ACTB,ACTA2
Glycerol Degradation I	5.38E-01	2E-01		GPD2
Mitochondrial Dysfunction	5.25E-01	7.88E-02		UCP2,APP,PDHA1,NCSTN,COX17,CAT,NDUFA3,CASP3,XDH,MAOB,FURIN,CASP8,GPD2
UVC-Induced MAPK Signaling	5.2E-01	9.52E-02	2.000	JUN,SMPD2,ATR,MAPK13
Basal Cell Carcinoma Signaling	5.14E-01	8.7E-02		FZD1,BMP1,SMO,GLI1,TCF7L2,STK36
GPCR-Mediated Nutrient Sensing in Enteroendocrine Cells	5.08E-01	8.43E-02		ITPR2,ADCY7,PLCH2,PLCE1,ITPR1,PRKAG1,PLCG2
γ-linolenate Biosynthesis II (Animals)	5.06E-01	1.18E-01		ACSL1,ACSL5
Mitochondrial L-carnitine Shuttle Pathway	5.06E-01	1.18E-01		ACSL1,ACSL5
Ethanol Degradation II	4.96E-01	1E-01		ALDH3A2,ACSL1,ACSS2
CDK5 Signaling	4.91E-01	8.16E-02	1.414	ADCY7,CAPN1,LAMB1,MAPK13,EGR1,PPP1R3A,PRKAG1,PPP1R1B
Adipogenesis pathway	4.9E-01	7.94E-02		BMPR1A,TXNIP,CEBPD,FZD1,SMO,SOX9,RPS6KA1,KLF5,BSCL2,FGFRL1
HIPPO signaling	4.79E-01	8.24E-02	-0.447	LLGL1,AMOT,TJP2,WWTR1,PPP1R3A,YWHAH,CD44
GNRH Signaling	4.79E-01	7.87E-02	1.897	JUN,NFKB2,ITPR2,NFKB1,ADCY7,MAPK13,MAP3K12,ITPR1,EGR1,PRKAG1
Sperm Motility	4.78E-01	7.96E-02	3.000	ITPR2,NPR1,PLA2G1B,PLCH2,PLCE1,ITPR1,PRKAG1,FRK,PLCG2
Arginine Biosynthesis IV	4.72E-01	1.67E-01		OAT
Proline Biosynthesis II (from Arginine)	4.72E-01	1.67E-01		OAT
Urea Cycle	4.72E-01	1.67E-01		ARG2
Acetyl-CoA Biosynthesis I (Pyruvate Dehydrogenase Complex)	4.72E-01	1.67E-01		PDHA1
Adenine and Adenosine Salvage III	4.72E-01	1.67E-01		PNP
Purine Ribonucleosides Degradation to Ribose-1-phosphate	4.72E-01	1.67E-01		PNP
Ceramide Degradation	4.72E-01	1.67E-01		NAAA
GDP-mannose Biosynthesis	4.72E-01	1.67E-01		PMM1
Superpathway of Methionine Degradation	4.71E-01	9.68E-02		CDO1,AHCYL2,SUOX
Insulin Receptor Signaling	4.67E-01	7.81E-02		PIK3R3,PIK3CD,PIK3C2A,SGK1,PIK3C2B,PIK3R1,PPP1R3A,PRKAG1,PIK3C3,PIK3C2G
Dopamine-DARPP32 Feedback in cAMP Signaling	4.61E-01	7.64E-02	1.508	ITPR2,CREM,ADCY7,CHP1,PLCH2,PLCE1,KCNJ15,ITPR1,PPP1R3A,PRKAG1,PPP1R1B,PLCG2
TGF-β Signaling	4.51E-01	8.05E-02	2.236	JUN,BMPR1A,TGFBR2,MAPK13,TGIF1,HNF4A,PMEPA1
Hepatic Cholestasis	4.51E-01	7.59E-02		JUN,NFKB2,NFKB1,ABCC2,CD14,TNFRSF1B,ADCY7,TJP2,HNF4A,PRKAG1,ATP8B1,IL33
RAR Activation	4.44E-01	7.51E-02		JUN,SORBS3,NFKB1,PIK3R3,ADCY7,HLTF,PIK3R1,TRIM24,NFKB2,PIK3CD,MAPK13,TNIP1,PRKAG1
Tryptophan Degradation III (Eukaryotic)	4.42E-01	1.05E-01		HSD17B4,HADHA
p38 MAPK Signaling	4.31E-01	7.69E-02	2.828	TGFBR2,STAT1,TNFRSF1B,MAPK13,PLA2G1B,RPS6KA1,MKNK2,HMGN1,IL33
Ketolysis	4.19E-01	1.43E-01		HADHA
Pregnenolone Biosynthesis	4.19E-01	1.43E-01		MICAL1
PPAR Signaling	4.12E-01	7.78E-02	-2.646	JUN,NFKB2,NFKB1,PDGFRA,TNFRSF1B,PDGFA,IL33
IL-1 Signaling	4E-01	7.69E-02	2.449	JUN,NFKB2,NFKB1,GNB5,ADCY7,MAPK13,PRKAG1
D-myo-inositol (1,4,5,6)-Tetrakisphosphate Biosynthesis	3.98E-01	7.5E-02		NUDT4,PPP1R13B,PTPRC,PTPN13,SIRPA,PPP1R1B,EPHX2,DUSP16,CILP
D-myo-inositol (3,4,5,6)-tetrakisphosphate Biosynthesis	3.98E-01	7.5E-02		NUDT4,PPP1R13B,PTPRC,PTPN13,SIRPA,PPP1R1B,EPHX2,DUSP16,CILP
Dopamine Receptor Signaling	3.96E-01	7.79E-02	1.000	ADCY7,PTS,PPP1R3A,PRKAG1,PPP1R1B,MAOB
Dopamine Degradation	3.88E-01	9.52E-02		ALDH3A2,MAOB
Endoplasmic Reticulum Stress Pathway	3.88E-01	9.52E-02		CASP3,CASP7
G-Protein Coupled Receptor Signaling	3.79E-01	7.09E-02		NFKB1,PIK3R3,PIK3C2A,ADCY7,GABBR1,PIK3C2B,PIK3R1,RGS12,NFKB2,PIK3CD,RGS2,RPS6KA1,DUSP6,RGS10,PRKAG1,ADRA2A,PIK3C2G,PIK3C3
Airway Pathology in Chronic Obstructive Pulmonary Disease	3.75E-01	1.25E-01		MMP2
Sphingosine and Sphingosine-1-phosphate Metabolism	3.75E-01	1.25E-01		NAAA
Sucrose Degradation V (Mammalian)	3.75E-01	1.25E-01		GALM
Salvage Pathways of Pyrimidine Deoxyribonucleotides	3.75E-01	1.25E-01		APOBEC3B
Role of MAPK Signaling in the Pathogenesis of Influenza	3.51E-01	7.58E-02		CCL5,MAPK13,PLA2G1B,CASP3,BAX
Semaphorin Signaling in Neurons	3.43E-01	7.69E-02		LIMK2,RHOC,FES,PLXNB1
Serotonin Degradation	3.43E-01	7.69E-02		ALDH3A2,UGT2B7,UGT2B10,MAOB
Pathogenesis of Multiple Sclerosis	3.37E-01	1.11E-01		CCL5
Assembly of RNA Polymerase I Complex	3.37E-01	1.11E-01		TAF1B
IL-22 Signaling	3.2E-01	8.33E-02		STAT1,MAPK13
Superpathway of D-myo-inositol (1,4,5)-trisphosphate Metabolism	3.2E-01	8.33E-02		ITPKB,IMPA1
Oleate Biosynthesis II (Animals)	3.04E-01	1E-01		SCD
Pentose Phosphate Pathway	3.04E-01	1E-01		PGD
Histidine Degradation VI	3.04E-01	1E-01		MICAL1
Glycine Betaine Degradation	3.04E-01	1E-01		SRR
Regulation of Cellular Mechanics by Calpain Protease	3.02E-01	7.27E-02		VCL,CAPN6,CAPN1,ITGA4
Transcriptional Regulatory Network in Embryonic Stem Cells	3.02E-01	7.5E-02		HNF4A,TRIM24,L1CAM
Role of JAK family kinases in IL-6-type Cytokine Signaling	3.01E-01	8E-02		STAT1,MAPK13
Pyrimidine Ribonucleotides Interconversion	3.01E-01	8E-02		CTPS2,ENTPD6
Glutamate Receptor Signaling	2.9E-01	7.14E-02		GLUL,GRIA3,GRIK5,SLC1A2
Role of IL-17F in Allergic Inflammatory Airway Diseases	2.87E-01	7.32E-02		NFKB2,NFKB1,RPS6KA1
Protein Ubiquitination Pathway	2.86E-01	6.69E-02		USP54,DNAJC4,B2M,HSPA4L,USP18,PSME1,TAP1,HLA-A,DNAJC9,TAP2,HSPA8,PSMD1,XIAP,DNAJC22,HSPH1,NEDD4L,PSMB8
Antiproliferative Role of TOB in T Cell Signaling	2.83E-01	7.69E-02		TGFBR2,RPS6KA1
Thyroid Hormone Metabolism II (via Conjugation and/or Degradation)	2.83E-01	7.69E-02		UGT2B7,UGT2B10
Acyl-CoA Hydrolysis	2.76E-01	9.09E-02		HNF4A
Pyrimidine Ribonucleotides De Novo Biosynthesis	2.66E-01	7.41E-02		CTPS2,ENTPD6
Superpathway of Cholesterol Biosynthesis	2.66E-01	7.41E-02		HMGCS2,HADHA
Serotonin Receptor Signaling	2.61E-01	6.98E-02		ADCY7,PTS,MAOB
ATM Signaling	2.56E-01	6.78E-02		JUN,MAPK13,MDC1,SMC2
Cleavage and Polyadenylation of Pre-mRNA	2.51E-01	8.33E-02		CSTF3
Histamine Degradation	2.51E-01	8.33E-02		ALDH3A2
BER pathway	2.51E-01	8.33E-02		LIG1
Ubiquinol-10 Biosynthesis (Eukaryotic)	2.29E-01	7.69E-02		MICAL1
DNA Double-Strand Break Repair by Homologous Recombination	2.1E-01	7.14E-02		LIG1
Isoleucine Degradation I	2.1E-01	7.14E-02		HADHA
Telomere Extension by Telomerase	1.92E-01	6.67E-02		TINF2
Fatty Acid α-oxidation	1.92E-01	6.67E-02		ALDH3A2

## Sheet: Canonical Pathways DOWN 1.5-fol
© 2000-2015 QIAGEN. All rights reserved.
Ingenuity Canonical Pathways	-log(p-value)	Ratio	z-score	Molecules
Unfolded protein response	7.83E00	3.02E-01		INSIG1,EDEM1,SREBF1,SEL1L,ATF6,CEBPA,HSPA9,DNAJC3,ATF4,CEBPB,CEBPG,PPP1R15A,PDIA2,ERO1LB,EIF2AK3,P4HB
EIF2 Signaling	6.59E00	1.63E-01	-3.873	RPS27L,AKT1,RPL13A,RPL32,RPS24,EIF2S2,EIF2B1,RPS4Y1,EIF4A1,EIF2B2,RPL4,RPL41,RPL18A,RPLP0,RPS8,RPL39,EIF1AX,RRAS2,RPS7,RPL13,EIF5,RPS19,AGO4,PPP1R15A,EIF2B4,EIF2AK3,RPS15,RPL10A
Superpathway of Serine and Glycine Biosynthesis I	5.01E00	7.14E-01		PSAT1,PSPH,PHGDH,SHMT2,DUSP26
tRNA Charging	4.53E00	2.63E-01		NARS,GARS,YARS,LARS2,MARS2,MARS,TARSL2,LARS,IARS,WARS
Serine Biosynthesis	4.35E00	8E-01		PSAT1,PSPH,PHGDH,DUSP26
Regulation of eIF4 and p70S6K Signaling	3.96E00	1.41E-01	-2.000	RPS27L,EIF1AX,AKT1,RRAS2,RPS7,RPS24,RPS19,AGO4,EIF2S2,MKNK1,EIF2B1,RPS4Y1,EIF4A1,EIF2B2,EIF2B4,PRKCZ,EIF4EBP1,RPS6KB1,RPS8,RPS15
Valine Degradation I	3.53E00	3.33E-01		BCAT2,DBT,BCKDHB,EHHADH,ABAT,ECHS1
Proline Biosynthesis I	3.19E00	7.5E-01		PYCR1,ALDH18A1,PYCR2
Phenylalanine Degradation I (Aerobic)	3.19E00	7.5E-01		QDPR,PAH,PCBD1
Folate Polyglutamylation	2.81E00	6E-01		MTHFD1L,SHMT2,FPGS
Pyrimidine Ribonucleotides Interconversion	2.7E00	2.4E-01		ENTPD7,ENTPD1,NME1,CTPS1,CMPK2,NME2
Thiosulfate Disproportionation III (Rhodanese)	2.51E00	1E00		MOCS3,TST
Glycine Degradation (Creatine Biosynthesis)	2.51E00	1E00		GAMT,GATM
Cysteine Biosynthesis/Homocysteine Degradation	2.51E00	1E00		CBS/LOC102724560,CTH
Pyrimidine Ribonucleotides De Novo Biosynthesis	2.51E00	2.22E-01		ENTPD7,ENTPD1,NME1,CTPS1,CMPK2,NME2
Endoplasmic Reticulum Stress Pathway	2.3E00	2.38E-01		DNAJC3,ATF4,CASP9,ATF6,EIF2AK3
Retinol Biosynthesis	2.27E00	2E-01		CEL,PNLIPRP2,DHRS3,PNLIPRP1,RDH11,PNLIP
Superpathway of Citrulline Metabolism	2.22E00	2.86E-01		ALDH18A1,LOC102724788/PRODH,GLS2,ASL
Citrulline Biosynthesis	2.12E00	3.75E-01		ALDH18A1,LOC102724788/PRODH,GLS2
Tyrosine Biosynthesis IV	2.05E00	6.67E-01		PAH,PCBD1
4-aminobutyrate Degradation I	2.05E00	6.67E-01		ABAT,SUCLG2
Triacylglycerol Degradation	2.04E00	2.08E-01		CEL,PNLIPRP2,PNLIPRP1,PNLIP,MGLL
Wnt/Ca+ pathway	1.99E00	1.45E-01	-2.646	PLCD1,ATF4,NFATC2,PLCB4,AXIN1,NFATC1,DVL3,PLCL1
Leucine Degradation I	1.96E00	3.33E-01		BCAT2,MCCC1,IVD
Folate Transformations I	1.96E00	3.33E-01		MTHFD1L,SHMT2,MTHFD2
mTOR Signaling	1.91E00	9.89E-02	-2.121	RPS27L,AKT1,RRAS2,PGF,RPS7,RPS24,RHOQ,RPS19,PRKAA2,RPS4Y1,EIF4A1,VEGFB,PRKCZ,EIF4EBP1,RHOU,RPS6KB1,RPS8,RPS15
Protein Ubiquitination Pathway	1.85E00	9.06E-02		UBE2J1,UBE2F,UBR2,CRYAB,THOP1,HSPB8,PSMD6,UBE2G1,HSPB1,USP36,HSPA9,FBXW7,DNAJC3,DNAJC21,USP2,DNAJC28,UCHL5,CDC34,USP31,DNAJB11,PSMB10,USP43,UBC
Glycine Betaine Degradation	1.82E00	3E-01		PIPOX,SHMT2,SARDH
Cysteine Biosynthesis III (mammalia)	1.82E00	2.22E-01		CBS/LOC102724560,MAT1A,CTH,AHCY
Role of Macrophages, Fibroblasts and Endothelial Cells in Rheumatoid Arthritis	1.77E00	8.71E-02		CXCL12,AKT1,NFATC2,PGF,IL6R,AXIN1,PDGFB,PRSS1,PRSS3,PRSS2,VEGFB,PRKCZ,MIF,PLCL1,IRAK1,PLCD1,RRAS2,PLCB4,NFATC1,CEBPA,MYC,ATF4,CCND1,CEBPB,CEBPG
Branched-chain α-keto acid Dehydrogenase Complex	1.77E00	5E-01		DBT,BCKDHB
NRF2-mediated Oxidative Stress Response	1.72E00	9.6E-02	-3.162	GSTA3,RRAS2,AKT1,HSPB8,SCARB1,ABCC1,DNAJC3,DNAJC21,ATF4,CDC34,DNAJB11,FTL,GSTP1,PRKCZ,GCLM,EIF2AK3,HERPUD1
Cardiac Hypertrophy Signaling	1.69E00	9.09E-02	-2.683	GNAI1,PLCD1,RRAS2,AKT1,PLCB4,IL6R,RHOQ,ATF6,CACNA1A,MAP3K9,HSPB1,EIF2B1,GNA14,EIF2B2,MEF2D,EIF2B4,RHOU,PLCL1,RPS6KB1,ADCY9
Aldosterone Signaling in Epithelial Cells	1.69E00	9.93E-02		PLCD1,CRYAB,PLCB4,HSPB8,NR3C2,HSPB1,HSPA9,DNAJC3,DNAJC21,DNAJC28,DNAJB11,PIP5K1C,PRKCZ,PLCL1,AHCY
Maturity Onset Diabetes of Young (MODY) Signaling	1.65E00	2E-01		GCK,PKLR,ALDOB,CACNA1A
ERK5 Signaling	1.65E00	1.27E-01	-2.646	EGF,MYC,ATF4,RRAS2,AKT1,MEF2D,PRKCZ,RPS6KB1
Insulin Receptor Signaling	1.6E00	1.02E-01		GRB10,AKT1,RRAS2,RHOQ,FYN,PPP1R14B,EIF2B1,SYNJ2,EIF2B2,EIF2B4,PRKCZ,EIF4EBP1,RPS6KB1
Superpathway of Methionine Degradation	1.58E00	1.61E-01		CBS/LOC102724560,MAT1A,CTH,GOT1,AHCY
Tetrahydrofolate Salvage from 5,10-methenyltetrahydrofolate	1.56E00	4E-01		MTHFD1L,MTHFD2
Glutamate Degradation III (via 4-aminobutyrate)	1.56E00	4E-01		ABAT,SUCLG2
Prostate Cancer Signaling	1.49E00	1.13E-01		ATF4,RRAS2,AKT1,CCND1,CASP9,KLK3,PA2G4,GSTP1,TFDP1
GPCR-Mediated Integration of Enteroendocrine Signaling Exemplified by an L Cell	1.41E00	1.14E-01		GNAI1,PLCD1,PLCB4,VIPR1,GNA14,PLCL1,ADCY9,GAL
Isoleucine Degradation I	1.41E00	2.14E-01		BCAT2,EHHADH,ECHS1
Arginine Biosynthesis IV	1.4E00	3.33E-01		GLUD1,ASL
Proline Biosynthesis II (from Arginine)	1.4E00	3.33E-01		PYCR1,PYCR2
Arginine Degradation VI (Arginase 2 Pathway)	1.4E00	3.33E-01		PYCR1,PYCR2
Purine Ribonucleosides Degradation to Ribose-1-phosphate	1.4E00	3.33E-01		PGM2,ADAL
GDP-glucose Biosynthesis	1.4E00	3.33E-01		PGM2,GCK
PI3K Signaling in B Lymphocytes	1.4E00	9.76E-02		PLCD1,FYN,ATF4,RRAS2,AKT1,NFATC2,PLCB4,ATF5,ATF6,NFATC1,PRKCZ,PLCL1
Superpathway of D-myo-inositol (1,4,5)-trisphosphate Metabolism	1.39E00	1.67E-01		INPP1,SYNJ2,ITPKC,ITPKA
FXR/RXR Activation	1.36E00	9.6E-02		PCK2,VTN,PPARGC1A,AKT1,SREBF1,PKLR,VLDLR,PPARA,FETUB,LCAT,SCARB1,NR5A2
Adipogenesis pathway	1.33E00	9.52E-02		FBXW7,AKT1,SREBF1,HDAC10,CEBPB,CTNNBIP1,SAP30L,HDAC11,CLOCK,CEBPA,RPS6KB1,BMP7
Bladder Cancer Signaling	1.32E00	1.05E-01		EGF,MYC,RRAS2,CCND1,FGF21,PGF,PA2G4,TFDP1,VEGFB
IL-4 Signaling	1.32E00	1.1E-01		RRAS2,AKT1,NFATC2,NR3C1,SYNJ2,NR3C2,NFATC1,RPS6KB1
Glucose and Glucose-1-phosphate Degradation	1.27E00	2.86E-01		PGM2,GCK
Methylthiopropionate Biosynthesis	1.26E00	1E00		ADI1
Threonine Degradation II	1.26E00	1E00		GCAT
L-cysteine Degradation II	1.26E00	1E00		CTH
VEGF Signaling	1.24E00	1.01E-01	-2.000	EIF1AX,RRAS2,AKT1,EIF2S2,PGF,EIF2B1,EIF2B2,EIF2B4,VEGFB
Cell Cycle: G1/S Checkpoint Regulation	1.23E00	1.11E-01	1.342	GNL3,MYC,HDAC10,CCND1,PA2G4,HDAC11,TFDP1
Hypoxia Signaling in the Cardiovascular System	1.23E00	1.11E-01		UBE2J1,UBE2F,ATF4,AKT1,CDC34,UBE2G1,P4HB
Glioblastoma Multiforme Signaling	1.23E00	8.97E-02	-3.464	PLCD1,AKT1,RRAS2,PLCB4,AXIN1,PDGFB,RHOQ,EGF,MYC,CCND1,RHOU,PLCL1,RPS6KB1
Endometrial Cancer Signaling	1.18E00	1.15E-01		MYC,RRAS2,AKT1,CCND1,CASP9,AXIN1
Non-Small Cell Lung Cancer Signaling	1.17E00	1.08E-01	-1.342	EGF,RRAS2,AKT1,CCND1,CASP9,PA2G4,TFDP1
Histidine Degradation III	1.16E00	2.5E-01		MTHFD1L,MTHFD2
Salvage Pathways of Pyrimidine Ribonucleotides	1.14E00	9.68E-02		IRAK1,PKN1,PRKAA2,UPP2,CDK18,NME1,MAP3K9,CMPK2,NME2
Glioma Signaling	1.12E00	9.57E-02	-2.646	EGF,RRAS2,AKT1,CCND1,PA2G4,CAMK1D,PDGFB,TFDP1,PRKCZ
Sphingosine-1-phosphate Signaling	1.12E00	9.26E-02	-2.333	GNAI1,PLCD1,AKT1,PLCB4,CASP9,RHOQ,PDGFB,RHOU,PLCL1,ADCY9
Heparan Sulfate Biosynthesis	1.09E00	1.09E-01		CHST2,HS3ST3B1,HS2ST1,B3GALT6,EXTL1,EXTL3
1D-myo-inositol Hexakisphosphate Biosynthesis II (Mammalian)	1.07E00	1.58E-01		SYNJ2,ITPKC,ITPKA
Purine Nucleotides Degradation II (Aerobic)	1.07E00	1.58E-01		IMPDH1,ADAL,NT5M
D-myo-inositol (1,3,4)-trisphosphate Biosynthesis	1.07E00	1.58E-01		SYNJ2,ITPKC,ITPKA
UDP-N-acetyl-D-galactosamine Biosynthesis II	1.07E00	2.22E-01		GCK,GPI
Serotonin Receptor Signaling	1.06E00	1.16E-01		GCH1,SMOX,ADCY9,QDPR,PCBD1
Pyrimidine Deoxyribonucleotides De Novo Biosynthesis I	9.7E-01	1.43E-01		NME1,CMPK2,NME2
Triacylglycerol Biosynthesis	9.7E-01	1.21E-01		GPAM,DBT,PPAPDC1B,LPIN3
Epoxysqualene Biosynthesis	9.68E-01	5E-01		SQLE
β-alanine Degradation I	9.68E-01	5E-01		ABAT
Proline Degradation	9.68E-01	5E-01		LOC102724788/PRODH
S-methyl-5-thio-α-D-ribose 1-phosphate Degradation	9.68E-01	5E-01		APIP
L-cysteine Degradation III	9.68E-01	5E-01		GOT1
Putrescine Biosynthesis III	9.68E-01	5E-01		ODC1
Glycine Biosynthesis I	9.68E-01	5E-01		SHMT2
Glutamine Degradation I	9.68E-01	5E-01		GLS2
Glutamate Biosynthesis II	9.68E-01	5E-01		GLUD1
Glutamate Degradation X	9.68E-01	5E-01		GLUD1
Prolactin Signaling	9.65E-01	9.59E-02	-1.342	MYC,SOCS7,FYN,RRAS2,NR3C1,CEBPB,PRKCZ
P2Y Purigenic Receptor Signaling Pathway	9.27E-01	8.47E-02	-2.530	GNAI1,PLCD1,MYC,ATF4,RRAS2,AKT1,PLCB4,PRKCZ,PLCL1,ADCY9
Glutaryl-CoA Degradation	9.18E-01	1.82E-01		GCDH,EHHADH
Purine Nucleotides De Novo Biosynthesis II	9.18E-01	1.82E-01		IMPDH1,PPAT
Heparan Sulfate Biosynthesis (Late Stages)	9.04E-01	1.04E-01		CHST2,HS3ST3B1,HS2ST1,EXTL1,EXTL3
tRNA Splicing	9E-01	1.14E-01		PDE4A,PDE8B,TSEN54,PDE2A
Acute Myeloid Leukemia Signaling	8.97E-01	9.21E-02	-1.633	MYC,RRAS2,AKT1,CCND1,CEBPA,EIF4EBP1,RPS6KB1
Pancreatic Adenocarcinoma Signaling	8.78E-01	8.49E-02	-1.890	EGF,AKT1,NOTCH1,CCND1,PGF,CASP9,PA2G4,TFDP1,VEGFB
VDR/RXR Activation	8.76E-01	9.09E-02	0.447	SERPINB1,BGLAP,TRPV6,PPARD,CEBPB,PRKCZ,CEBPA
Chronic Myeloid Leukemia Signaling	8.65E-01	8.7E-02		MYC,RRAS2,AKT1,HDAC10,CCND1,PA2G4,HDAC11,TFDP1
cAMP-mediated signaling	8.4E-01	7.41E-02	-3.464	GNAI1,PDE4A,AKAP2,LAMTOR3,P2RY14,VIPR1,RAP1GAP,CAMK1D,PTGER4,PDE2A,ATF4,PDE8B,PTGER3,ADCY9,ADORA1,AKAP1
IL-22 Signaling	8.4E-01	1.25E-01		IL10RB,AKT1,IL22RA1
Estrogen-mediated S-phase Entry	8.4E-01	1.25E-01		MYC,CCND1,TFDP1
Glycolysis I	8.4E-01	1.25E-01		PKLR,ALDOB,GPI
Axonal Guidance Signaling	8.37E-01	6.81E-02		GNAI1,CXCL12,AKT1,NFATC2,PGF,PDGFB,FYN,SEMA7A,GNA14,ADAMTS9,GIT1,VEGFB,PRKCZ,PLCL1,ECE2,BMP7,PLXNA2,PLCD1,RRAS2,NTN1,PLCB4,UNC5A,NFATC1,EGF,PLXND1,MKNK1,TUBA4A,ADAMTS7,BMP3
Notch Signaling	8.35E-01	1.08E-01		DTX1,NOTCH1,JAG1,LFNG
ERK/MAPK Signaling	8.23E-01	7.53E-02	-1.941	RRAS2,LAMTOR3,TLN2,NFATC1,DUSP2,ETS2,HIST1H3C,HSPB1,MYC,FYN,ATF4,PPP1R14B,MKNK1,EIF4EBP1
Thrombin Signaling	8.1E-01	7.49E-02	-3.051	GNAI1,PLCD1,AKT1,RRAS2,PLCB4,CAMK1D,RHOQ,EGF,GNA14,PRKCZ,RHOU,PLCL1,RPS6KB1,ADCY9
Trehalose Degradation II (Trehalase)	8.04E-01	3.33E-01		GCK
NADH Repair	8.04E-01	3.33E-01		CARKD
Methylglyoxal Degradation I	8.04E-01	3.33E-01		HAGH
5-aminoimidazole Ribonucleotide Biosynthesis I	8.04E-01	3.33E-01		PPAT
Glutathione Biosynthesis	8.04E-01	3.33E-01		GCLM
Tetrahydrobiopterin Biosynthesis I	8.04E-01	3.33E-01		GCH1
Hypusine Biosynthesis	8.04E-01	3.33E-01		EIF5A
Spermidine Biosynthesis I	8.04E-01	3.33E-01		SRM
Tetrahydrobiopterin Biosynthesis II	8.04E-01	3.33E-01		GCH1
Glutamate Degradation II	8.04E-01	3.33E-01		GOT1
S-adenosyl-L-methionine Biosynthesis	8.04E-01	3.33E-01		MAT1A
Fatty Acid β-oxidation III (Unsaturated, Odd Number)	8.04E-01	3.33E-01		EHHADH
Aspartate Biosynthesis	8.04E-01	3.33E-01		GOT1
Glutathione-mediated Detoxification	8.01E-01	1.2E-01		GSTA3,GSTP1,NAT8
Gluconeogenesis I	8.01E-01	1.2E-01		ALDOB,ME2,GPI
Cholesterol Biosynthesis I	7.97E-01	1.54E-01		SQLE,SC5D
Cholesterol Biosynthesis II (via 24,25-dihydrolanosterol)	7.97E-01	1.54E-01		SQLE,SC5D
Cholesterol Biosynthesis III (via Desmosterol)	7.97E-01	1.54E-01		SQLE,SC5D
Telomerase Signaling	7.92E-01	8.33E-02	-2.449	EGF,MYC,DKC1,RRAS2,AKT1,HDAC10,HDAC11,ETS2
Thyroid Cancer Signaling	7.76E-01	1.03E-01		MYC,RRAS2,CCND1,KLK3
Netrin Signaling	7.76E-01	1.03E-01		NFATC2,NTN1,UNC5A,NFATC1
UVB-Induced MAPK Signaling	7.74E-01	9.43E-02	-2.000	HIST1H3C,AKT1,PRKCZ,EIF4EBP1,RPS6KB1
G-Protein Coupled Receptor Signaling	7.72E-01	7.09E-02		GNAI1,PDE4A,RRAS2,AKT1,PLCB4,LAMTOR3,P2RY14,VIPR1,RAP1GAP,PTGER4,PDE2A,FYN,ATF4,PDE8B,GNA14,PTGER3,ADCY9,ADORA1
Antiproliferative Role of TOB in T Cell Signaling	7.65E-01	1.15E-01		TOB1,CDC34,PABPC4
D-myo-inositol (1,4,5)-Trisphosphate Biosynthesis	7.65E-01	1.15E-01		PLCD1,PLCB4,PIP5K1C
GPCR-Mediated Nutrient Sensing in Enteroendocrine Cells	7.57E-01	8.43E-02		GNAI1,PLCD1,PLCB4,GNA14,PRKCZ,PLCL1,ADCY9
Protein Kinase A Signaling	7.55E-01	6.76E-02		GNAI1,PDE4A,DUSP3,NFATC2,KDELR3,DUSP26,HIST1H3C,HIST1H1C,PPP1R14B,PRKCZ,PLCL1,AKAP1,PLCD1,NTN1,AKAP2,PLCB4,PTPN3,PDE2A,NFATC1,DUSP2,DUSP22,PTPRJ,ATF4,PDE8B,ADCY9
LPS/IL-1 Mediated Inhibition of RXR Function	7.49E-01	7.21E-02	1.633	IRAK1,CHST2,HS3ST3B1,GSTA3,ALDH1L1,HS2ST1,SMOX,SREBF1,PPARA,ALDH18A1,SCARB1,NR5A2,PPARGC1A,ALDH1L2,GSTP1
nNOS Signaling in Skeletal Muscle Cells	7.46E-01	1.43E-01		SNTB1,DAG1
Urate Biosynthesis/Inosine 5'-phosphate Degradation	7.46E-01	1.43E-01		IMPDH1,NT5M
Phenylalanine Degradation IV (Mammalian, via Side Chain)	7.46E-01	1.43E-01		SMOX,GOT1
Ovarian Cancer Signaling	7.37E-01	7.69E-02		EGF,RRAS2,AKT1,CCND1,PGF,AXIN1,PA2G4,TFDP1,VEGFB,RPS6KB1
Small Cell Lung Cancer Signaling	7.02E-01	8.45E-02		MYC,AKT1,CCND1,CASP9,PA2G4,TFDP1
p38 MAPK Signaling	7E-01	7.69E-02	-2.646	HIST1H3C,HSPB1,IRAK1,MYC,ATF4,MKNK1,MAPT,MEF2D,RPS6KB1
The Visual Cycle	6.99E-01	1.33E-01		DHRS3,RDH11
γ-glutamyl Cycle	6.99E-01	1.33E-01		GGT1,GCLM
Arsenate Detoxification I (Glutaredoxin)	6.91E-01	2.5E-01		GLRX2
Spermine and Spermidine Degradation I	6.91E-01	2.5E-01		SMOX
Eumelanin Biosynthesis	6.91E-01	2.5E-01		MIF
Biotin-carboxyl Carrier Protein Assembly	6.91E-01	2.5E-01		ACACB
Melatonin Degradation II	6.91E-01	2.5E-01		SMOX
NAD Biosynthesis III	6.91E-01	2.5E-01		NMNAT2
L-cysteine Degradation I	6.91E-01	2.5E-01		GOT1
Molybdenum Cofactor Biosynthesis	6.91E-01	2.5E-01		MOCS3
UVA-Induced MAPK Signaling	6.87E-01	8.05E-02	-2.000	PLCD1,PARP16,RRAS2,PLCB4,CASP9,PLCL1,RPS6KB1
p70S6K Signaling	6.86E-01	7.63E-02	-3.000	GNAI1,PLCD1,RRAS2,AKT1,PLCB4,MAPT,PRKCZ,PLCL1,RPS6KB1
Wnt/β-catenin Signaling	6.8E-01	7.23E-02	0.333	PPARD,SOX6,MYC,AKT1,SOX12,APPL2,CCND1,AXIN1,SOX7,NR5A2,DVL3,UBC
IL-8 Signaling	6.69E-01	7.1E-02	-3.606	GNAI1,IRAK1,AKT1,RRAS2,PGF,RHOQ,EGF,CCND1,VEGFB,PRKCZ,EIF4EBP1,RHOU,RPS6KB1
eNOS Signaling	6.69E-01	7.41E-02	-1.890	HSPA9,AKT1,SLC7A1,PRKAA2,PGF,CASP9,VEGFB,AQP8,PRKCZ,ADCY9
Fatty Acid β-oxidation I	6.68E-01	1.03E-01		EHHADH,IVD,ECHS1
Endothelin-1 Signaling	6.68E-01	7.19E-02	-2.111	GNAI1,PLCD1,MYC,RRAS2,PLCB4,CASP9,LCAT,GNA14,PRKCZ,PLCL1,ADCY9,ECE2
Gap Junction Signaling	6.68E-01	7.28E-02		BGLAP,GNAI1,PLCD1,EGF,RRAS2,AKT1,PLCB4,TUBA4A,PRKCZ,PLCL1,ADCY9
Myc Mediated Apoptosis Signaling	6.64E-01	8.62E-02		MYC,RRAS2,AKT1,CASP9,PRKCZ
Adenosine Nucleotides Degradation II	6.56E-01	1.25E-01		ADAL,NT5M
Methionine Degradation I (to Homocysteine)	6.56E-01	1.25E-01		MAT1A,AHCY
Retinoate Biosynthesis I	6.39E-01	1E-01		DHRS3,RDH11,SDR9C7
Granzyme A Signaling	6.17E-01	1.18E-01		HIST1H1C,NME1
HER-2 Signaling in Breast Cancer	6.13E-01	7.89E-02		EGF,RRAS2,AKT1,CCND1,CASP9,PRKCZ
Ephrin Receptor Signaling	6.12E-01	6.98E-02		GNAI1,CXCL12,EGF,FYN,ATF4,RRAS2,AKT1,PGF,AXIN1,GNA14,PDGFB,VEGFB
Protein Citrullination	6.06E-01	2E-01		PADI2
CMP-N-acetylneuraminate Biosynthesis I (Eukaryotes)	6.06E-01	2E-01		NANS
NAD Salvage Pathway III	6.06E-01	2E-01		NMNAT2
Lysine Degradation II	6.06E-01	2E-01		AASS
Lysine Degradation V	6.06E-01	2E-01		PIPOX
Citrulline-Nitric Oxide Cycle	6.06E-01	2E-01		ASL
dTMP De Novo Biosynthesis	6.06E-01	2E-01		SHMT2
Cellular Effects of Sildenafil (Viagra)	6.05E-01	7.26E-02		PLCD1,KCNN1,PDE4A,PLCB4,PDE2A,PABPC4,CACNA1A,PLCL1,ADCY9
Dopamine Receptor Signaling	5.97E-01	7.79E-02		GCH1,SMOX,PPP1R14B,ADCY9,QDPR,PCBD1
Estrogen-Dependent Breast Cancer Signaling	5.88E-01	8.06E-02		ATF4,RRAS2,AKT1,CCND1,HSD17B13
D-myo-inositol (1,4,5)-trisphosphate Degradation	5.81E-01	1.11E-01		INPP1,SYNJ2
Mouse Embryonic Stem Cell Pluripotency	5.79E-01	7.45E-02	-2.646	MYC,ID1,RRAS2,AKT1,AXIN1,LIFR,DVL3
PXR/RXR Activation	5.71E-01	7.94E-02		PCK2,PPARGC1A,AKT1,NR3C1,PPARA
Pyridoxal 5'-phosphate Salvage Pathway	5.71E-01	7.94E-02		IRAK1,PKN1,PRKAA2,CDK18,MAP3K9
Role of NFAT in Cardiac Hypertrophy	5.7E-01	6.82E-02	-1.732	GNAI1,PLCD1,RRAS2,AKT1,HDAC10,PLCB4,CAMK1D,MEF2D,HDAC11,PRKCZ,PLCL1,ADCY9
GNRH Signaling	5.68E-01	7.09E-02	-3.000	GNAI1,EGF,ATF4,RRAS2,PLCB4,GNA14,PRKCZ,ADCY9,MAP3K9
Reelin Signaling in Neurons	5.66E-01	7.59E-02		ITGA1,FYN,AKT1,VLDLR,MAPT,MAP3K9
Nitric Oxide Signaling in the Cardiovascular System	5.65E-01	7.37E-02	-1.633	AKT1,SLC7A1,PGF,PDE2A,VEGFB,CACNA1A,PRKCZ
Hereditary Breast Cancer Signaling	5.53E-01	7.14E-02		SLC19A1,RRAS2,AKT1,HDAC10,POLR2E,CCND1,HDAC11,UBC
Cardiomyocyte Differentiation via BMP Receptors	5.47E-01	1.05E-01		SMAD6,BMP7
Tryptophan Degradation III (Eukaryotic)	5.47E-01	1.05E-01		GCDH,EHHADH
DNA damage-induced 14-3-3σ Signaling	5.47E-01	1.05E-01		AKT1,HUS1
CNTF Signaling	5.43E-01	8.16E-02	-2.000	RRAS2,AKT1,LIFR,RPS6KB1
Sperm Motility	5.41E-01	7.08E-02	-2.828	PLCD1,PDE4A,PLCB4,LCAT,PDE2A,PRKCZ,PLCL1,PTK7
NAD Biosynthesis from 2-amino-3-carboxymuconate Semialdehyde	5.39E-01	1.67E-01		NMNAT2
Urea Cycle	5.39E-01	1.67E-01		ASL
Pentose Phosphate Pathway (Non-oxidative Branch)	5.39E-01	1.67E-01		RPIA
Acetyl-CoA Biosynthesis I (Pyruvate Dehydrogenase Complex)	5.39E-01	1.67E-01		DBT
Selenocysteine Biosynthesis II (Archaea and Eukaryotes)	5.39E-01	1.67E-01		SEPHS2
Adenine and Adenosine Salvage III	5.39E-01	1.67E-01		ADAL
Glycogen Biosynthesis II (from UDP-D-Glucose)	5.39E-01	1.67E-01		GYG1
GDP-mannose Biosynthesis	5.39E-01	1.67E-01		GPI
IGF-1 Signaling	5.38E-01	7.22E-02	-1.134	GRB10,SOCS7,RRAS2,AKT1,CASP9,PRKCZ,RPS6KB1
Colorectal Cancer Metastasis Signaling	5.25E-01	6.49E-02	-2.840	AKT1,RRAS2,IL6R,PGF,AXIN1,CASP9,RHOQ,PTGER4,EGF,MYC,CCND1,VEGFB,PTGER3,RHOU,ADCY9
GABA Receptor Signaling	5.21E-01	7.58E-02		KCNN1,GABRA4,ABAT,ADCY9,UBC
Synaptic Long Term Potentiation	5.05E-01	6.9E-02		PLCD1,ATF4,RRAS2,PPP1R14B,PLCB4,GNA14,PRKCZ,PLCL1
14-3-3-mediated Signaling	5.05E-01	6.9E-02		PLCD1,RRAS2,AKT1,PLCB4,TUBA4A,MAPT,PRKCZ,PLCL1
Superpathway of Inositol Phosphate Compounds	4.94E-01	6.52E-02		PLCD1,DUSP23,PPP1R14B,PLCB4,SYNJ2,ITPKC,PIP5K1C,ITPKA,DUSP2,PTPRJ,PPAPDC3,PGAM5
Melatonin Signaling	4.9E-01	7.35E-02	-2.236	GNAI1,PLCD1,PLCB4,PRKCZ,PLCL1
Chemokine Signaling	4.9E-01	7.35E-02	-2.236	GNAI1,CXCL12,RRAS2,PLCB4,CAMK1D
Semaphorin Signaling in Neurons	4.89E-01	7.69E-02		FYN,SEMA7A,RHOQ,RHOU
Chondroitin Sulfate Biosynthesis	4.89E-01	7.69E-02		CHST2,HS3ST3B1,HS2ST1,B3GALT6
NAD Salvage Pathway II	4.88E-01	9.52E-02		NMNAT2,NT5M
CXCR4 Signaling	4.88E-01	6.62E-02	-2.333	GNAI1,CXCL12,RRAS2,AKT1,PLCB4,GNA14,RHOQ,PRKCZ,RHOU,ADCY9
Glycoaminoglycan-protein Linkage Region Biosynthesis	4.83E-01	1.43E-01		B3GALT6
Aspartate Degradation II	4.83E-01	1.43E-01		GOT1
Aryl Hydrocarbon Receptor Signaling	4.8E-01	6.67E-02		HSPB1,MYC,GSTA3,ALDH1L1,CCND1,ALDH1L2,ALDH18A1,GSTP1,TFDP1
CREB Signaling in Neurons	4.77E-01	6.51E-02	-3.000	GNAI1,PLCD1,ATF4,RRAS2,AKT1,PLCB4,POLR2E,GNA14,PRKCZ,PLCL1,ADCY9
Neuregulin Signaling	4.68E-01	6.98E-02	-2.449	EGF,MYC,AKT1,RRAS2,PRKCZ,RPS6KB1
FAK Signaling	4.68E-01	6.98E-02		EGF,FYN,RRAS2,AKT1,TLN2,ARHGAP26
Xenobiotic Metabolism Signaling	4.64E-01	6.25E-02		CHST2,HS3ST3B1,GSTA3,ALDH1L1,HS2ST1,RRAS2,SMOX,ALDH18A1,CAMK1D,MAP3K9,PPARGC1A,ALDH1L2,FTL,GSTP1,PRKCZ,EIF2AK3
Polyamine Regulation in Colon Cancer	4.61E-01	9.09E-02		MYC,ODC1
Phospholipases	4.56E-01	7.41E-02		PLCD1,PLCB4,LCAT,PLCL1
PI3K/AKT Signaling	4.51E-01	6.61E-02	-1.633	RRAS2,AKT1,MCL1,CCND1,SYNJ2,PRKCZ,EIF4EBP1,RPS6KB1
FLT3 Signaling in Hematopoietic Progenitor Cells	4.48E-01	7.04E-02		ATF4,RRAS2,AKT1,EIF4EBP1,RPS6KB1
Dermatan Sulfate Biosynthesis	4.41E-01	7.27E-02		CHST2,HS3ST3B1,HS2ST1,B3GALT6
Regulation of Cellular Mechanics by Calpain Protease	4.41E-01	7.27E-02		EGF,RRAS2,CCND1,TLN2
Airway Pathology in Chronic Obstructive Pulmonary Disease	4.37E-01	1.25E-01		CELA2A
Sucrose Degradation V (Mammalian)	4.37E-01	1.25E-01		ALDOB
JAK/Stat Signaling	4.34E-01	6.94E-02	-0.447	SOCS7,RRAS2,AKT1,PIAS2,CEBPB
Dopamine-DARPP32 Feedback in cAMP Signaling	4.32E-01	6.37E-02	-1.897	GNAI1,PLCD1,ATF4,PPP1R14B,PLCB4,CAMKK1,CACNA1A,PRKCZ,PLCL1,ADCY9
Huntington's Disease Signaling	4.31E-01	6.19E-02		AKT1,HDAC10,PLCB4,POLR2E,NAPA,CASP9,EGF,HSPA9,ATF4,GNA14,HDAC11,PRKCZ,ATP5B,UBC
ErbB2-ErbB3 Signaling	4.26E-01	7.14E-02	-2.000	MYC,RRAS2,AKT1,CCND1
Leptin Signaling in Obesity	4.21E-01	6.85E-02		PLCD1,AKT1,PLCB4,PLCL1,ADCY9
Role of Tissue Factor in Cancer	4.2E-01	6.54E-02		FYN,RRAS2,AKT1,GNA14,PDIA2,RPS6KB1,P4HB
Neuroprotective Role of THOP1 in Alzheimer's Disease	4.17E-01	7.5E-02		THOP1,MAPT,ECE2
Glioma Invasiveness Signaling	4.11E-01	7.02E-02	-2.000	VTN,RRAS2,RHOQ,RHOU
BMP signaling pathway	4.09E-01	6.76E-02		SOSTDC1,RRAS2,SMAD6,BMP3,BMP7
Integrin Signaling	4.04E-01	6.15E-02	-2.530	ITGA1,FYN,RRAS2,AKT1,TSPAN5,GIT1,RHOQ,PDGFB,TLN2,ARHGAP26,RHOU,TNK2
Assembly of RNA Polymerase I Complex	3.97E-01	1.11E-01		POLR1B
Calcium Transport I	3.97E-01	1.11E-01		ATP2C2
Glycogen Degradation II	3.97E-01	1.11E-01		PGM2
VEGF Family Ligand-Receptor Interactions	3.85E-01	6.58E-02	-2.236	RRAS2,AKT1,PGF,VEGFB,PRKCZ
Melanoma Signaling	3.84E-01	7.14E-02		RRAS2,AKT1,CCND1
Dermatan Sulfate Biosynthesis (Late Stages)	3.84E-01	7.14E-02		CHST2,HS3ST3B1,HS2ST1
Cyclins and Cell Cycle Regulation	3.73E-01	6.49E-02		HDAC10,CCND1,PA2G4,HDAC11,TFDP1
Molecular Mechanisms of Cancer	3.69E-01	5.85E-02		GNAI1,AKT1,RRAS2,NOTCH1,PLCB4,LAMTOR3,AXIN1,SMAD6,CASP9,RHOQ,MYC,FYN,CCND1,GNA14,PA2G4,TFDP1,PRKCZ,RHOU,BMP3,ADCY9,BMP7
PPARα/RXRα Activation	3.67E-01	6.06E-02	3.162	PLCD1,PPARGC1A,RRAS2,PLCB4,PRKAA2,PPARA,GNA14,CLOCK,PLCL1,ADCY9
Oleate Biosynthesis II (Animals)	3.62E-01	1E-01		FADS1
Pentose Phosphate Pathway	3.62E-01	1E-01		RPIA
Dolichyl-diphosphooligosaccharide Biosynthesis	3.62E-01	1E-01		ALG3
Regulation of IL-2 Expression in Activated and Anergic T Lymphocytes	3.62E-01	6.41E-02		FYN,RRAS2,NFATC2,TOB1,NFATC1
Eicosanoid Signaling	3.58E-01	6.56E-02		GGT1,LCAT,PTGER4,PTGER3
Chondroitin Sulfate Biosynthesis (Late Stages)	3.54E-01	6.82E-02		CHST2,HS3ST3B1,HS2ST1
Type II Diabetes Mellitus Signaling	3.52E-01	6.14E-02		GCK,SOCS7,AKT1,PKLR,CEBPB,PRKAA2,PRKCZ
IL-15 Production	3.52E-01	7.41E-02		PRKCZ,PTK7
Superpathway of Cholesterol Biosynthesis	3.52E-01	7.41E-02		SQLE,SC5D
Relaxin Signaling	3.49E-01	6.06E-02		GNAI1,AKT1,PDE4A,PDE8B,GNA14,PDE2A,PRKCZ,ADCY9
Cardiac β-adrenergic Signaling	3.49E-01	6.06E-02	-1.633	PDE4A,AKAP2,PDE8B,PPP1R14B,PDE2A,CACNA1A,ADCY9,AKAP1
Role of Oct4 in Mammalian Embryonic Stem Cell Pluripotency	3.4E-01	6.67E-02		NR5A2,NR2F6,ETS2
CDK5 Signaling	3.37E-01	6.12E-02	-1.633	RRAS2,PPP1R14B,MAPT,CACNA1A,ADCY9,CABLES1
Glycogen Degradation III	3.32E-01	9.09E-02		PGM2
Neuropathic Pain Signaling In Dorsal Horn Neurons	3.28E-01	6.06E-02	-2.449	PLCD1,KCNN1,PLCB4,CAMK1D,PRKCZ,PLCL1
Synaptic Long Term Depression	3.25E-01	5.93E-02	-2.828	GNAI1,PLCD1,RRAS2,PLCB4,LCAT,GNA14,PRKCZ,PLCL1
PTEN Signaling	3.18E-01	5.93E-02	1.134	RRAS2,AKT1,CCND1,CASP9,SYNJ2,PRKCZ,RPS6KB1
D-myo-inositol-5-phosphate Metabolism	3.18E-01	5.88E-02		PLCD1,DUSP23,PPP1R14B,PLCB4,DUSP2,PTPRJ,PPAPDC3,PGAM5
Angiopoietin Signaling	3.12E-01	6.15E-02		ANGPTL1,RRAS2,AKT1,CASP9
Cholecystokinin/Gastrin-mediated Signaling	3.11E-01	5.94E-02	-2.449	RRAS2,PLCB4,RHOQ,MEF2D,PRKCZ,RHOU
3-phosphoinositide Degradation	3.1E-01	5.84E-02		DUSP23,MTMR1,PPP1R14B,SYNJ2,DUSP2,PTPRJ,PPAPDC3,PGAM5
Sertoli Cell-Sertoli Cell Junction Signaling	3.1E-01	5.78E-02		CLDN10,RRAS2,AKT1,YBX3,CLDN9,MPP6,AXIN1,TUBA4A,SPTBN2,MAP3K9
Cleavage and Polyadenylation of Pre-mRNA	3.05E-01	8.33E-02		CPSF4
Assembly of RNA Polymerase III Complex	3.05E-01	8.33E-02		GTF3C5
Gαi Signaling	3.02E-01	5.83E-02	-1.342	GNAI1,RRAS2,P2RY14,RAP1GAP,PTGER3,ADCY9,ADORA1
TR/RXR Activation	2.93E-01	5.88E-02		PPARGC1A,AKT1,SREBF1,SCARB1,THRB
ErbB Signaling	2.93E-01	5.88E-02		EGF,RRAS2,AKT1,PRKCZ,RPS6KB1
Erythropoietin Signaling	2.91E-01	5.97E-02		RRAS2,AKT1,PRKCZ,RPS6KB1
Agrin Interactions at Neuromuscular Junction	2.91E-01	5.97E-02		ITGA1,RRAS2,PKLR,DAG1
Neurotrophin/TRK Signaling	2.91E-01	5.97E-02	-2.000	ATF4,RRAS2,AKT1,KLK3
Phospholipase C Signaling	2.88E-01	5.63E-02	-3.000	RRAS2,NFATC2,HDAC10,PLCB4,RHOQ,NFATC1,FYN,ATF4,HDAC11,MEF2D,PRKCZ,RHOU,ADCY9
HGF Signaling	2.86E-01	5.77E-02	-2.236	RRAS2,AKT1,CCND1,PRKCZ,MAP3K9,ETS2
NAD biosynthesis II (from tryptophan)	2.82E-01	7.69E-02		NMNAT2
Ubiquinol-10 Biosynthesis (Eukaryotic)	2.82E-01	7.69E-02		BCKDHB
Guanosine Nucleotides Degradation III	2.82E-01	7.69E-02		NT5M
Macropinocytosis Signaling	2.81E-01	5.88E-02		EGF,RRAS2,PDGFB,PRKCZ
Inhibition of Angiogenesis by TSP1	2.72E-01	6.25E-02		FYN,AKT1
Role of JAK2 in Hormone-like Cytokine Signaling	2.72E-01	6.25E-02		SH2B3,SOCS7
Growth Hormone Signaling	2.72E-01	5.8E-02	-1.000	SOCS7,PRKCZ,CEBPA,RPS6KB1
Renal Cell Carcinoma Signaling	2.72E-01	5.8E-02		RRAS2,AKT1,PDGFB,UBC
Basal Cell Carcinoma Signaling	2.72E-01	5.8E-02		AXIN1,DVL3,BMP3,BMP7
NGF Signaling	2.7E-01	5.66E-02	-2.449	ATF4,RRAS2,AKT1,PRKCZ,MAP3K9,RPS6KB1
G Beta Gamma Signaling	2.67E-01	5.68E-02		GNAI1,RRAS2,AKT1,GNA14,PRKCZ
Nur77 Signaling in T Lymphocytes	2.66E-01	5.88E-02		CASP9,MEF2D,NFATC1
fMLP Signaling in Neutrophils	2.63E-01	5.61E-02	-2.449	GNAI1,RRAS2,NFATC2,PLCB4,NFATC1,PRKCZ
Colanic Acid Building Blocks Biosynthesis	2.6E-01	7.14E-02		GPI
Virus Entry via Endocytic Pathways	2.59E-01	5.62E-02		ITGA1,FYN,RRAS2,PRKCZ,TFRC
Circadian Rhythm Signaling	2.58E-01	6.06E-02		ATF4,CLOCK
MIF-mediated Glucocorticoid Regulation	2.58E-01	6.06E-02		NR3C1,MIF
PPAR Signaling	2.51E-01	5.56E-02	0.447	PPARD,PPARGC1A,RRAS2,PPARA,PDGFB
Toll-like Receptor Signaling	2.45E-01	5.56E-02		IRAK1,PPARA,TOLLIP,UBC
Leukotriene Biosynthesis	2.41E-01	6.67E-02		GGT1
Granzyme B Signaling	2.23E-01	6.25E-02		CASP9
Mismatch Repair in Eukaryotes	2.23E-01	6.25E-02		SLC19A1
CDP-diacylglycerol Biosynthesis I	2.23E-01	6.25E-02		GPAM
Tryptophan Degradation X (Mammalian, via Tryptamine)	2.23E-01	6.25E-02		SMOX
Putrescine Degradation III	2.23E-01	6.25E-02		SMOX
Parkinson's Signaling	2.23E-01	6.25E-02		CASP9
Glutathione Redox Reactions I	2.08E-01	5.88E-02		GPX1
γ-linolenate Biosynthesis II (Animals)	2.08E-01	5.88E-02		FADS1
Phosphatidylglycerol Biosynthesis II (Non-plastidic)	1.93E-01	5.56E-02		GPAM

## Sheet: Upstream Regulators UP 1.5-fold
© 2000-2015 QIAGEN. All rights reserved.
Upstream Regulator	Fold Change	Molecule Type	Predicted Activation State	Activation z-score	Notes	p-value of overlap	Target molecules in dataset	Mechanistic Network
TNF		cytokine	Activated	4.699	bias	3.11E-16	AGT,APOBEC3B,APOE,C3,CAT,CCL5,CD163,CD44,CD47,CDH11,CFB,CFD,COL16A1,COL1A2,CTSS,CXCL16,CXCR4,CYBA,CYBB,EDN1,EFNA1,EGR1,EHD1,EHF,ELF3,EXT1,FN1,GCLC,GPD2,HEXB,HPGD,ICOSLG/LOC102723996,IFNAR2,IFNGR1,IL4R,IRF1,IRF5,ITGA4,ITGAL,ITGB6,JUN,LAMB3,LGALS3,LYN,MARCKSL1,MCM3,MMP2,MUC5AC,NEDD9,NFE2L2,NFKB1,NFKB2,NR4A2,OAS2,PIGR,PRSS23,PSMB8,RAB32,RGS2,SEPP1,SLC1A2,SLC8A1,SOAT1,SOX4,SOX9,STAT1,TAP1,TAPBP,TGFBR…	155 (11)
TGFB1		growth factor	Activated	5.183	bias	2.81E-15	ACTA2,ADAM19,ALB,ANGPTL4,BAX,BCL2L11,BGN,BMP1,CCL5,CD163,CD44,CDH11,CLDN4,COL18A1,COL1A1,COL1A2,COL3A1,COL5A1,COL6A3,CSF1R,CXCR4,EDN1,FBLN1,FBN1,FN1,FURIN,GLI1,HEXB,IGFBP5,ITGA4,JUN,MAPK13,MKI67,MMP2,MRC1,NCAPD2,NEDD9,PDGFA,PIK3CD,PMEPA1,POLD1,RAB31,SCD,SERPINA3,SFRP1,SMC2,SOX4,SPARC,TAGLN,TGFBR2,TGIF1,THBS1,TNFRSF12A,TOP2A,TSPAN7,VIM,ZEB1,ZFP36	171 (12)
IFNG		cytokine	Activated	5.050	bias	8.19E-13	AGT,ATF3,BAX,BCL2L11,BMF,C1QA,C1QB,C1QC,CASP3,CASP8,CAT,CCL5,CD163,CIITA,CISH,CP,CTSS,CXCL16,CXCR4,CYBB,DDX58,DUOX2,ERBB2,FCER1G,GBP2,HLA-A,HLA-DQB1,HLA-DRA,ICOSLG/LOC102723996,IFIH1,IGFBP4,IRF1,IRF8,IRF9,JAK3,MARCKSL1,MMP2,NLRC5,OAS2,PIGR,PSMB8,PTN,RTP4,SERPINA5,SOAT1,STAT1,TAP1,TAP2,TCF7L2,TLR3,TNFRSF12A,TNFRSF1B,USP18,VCAM1	146 (10)
SMARCA4	1.489	transcription regulator				1.80E-10	AGR2,AGT,AHNAK,AIM1,ARHGDIB,CCR2,CD44,CD74,CIITA,COTL1,CTSB,CTSH,FBLIM1,FN1,FOSL2,GCLC,GPR56,HEXB,HLA-DRA,HPGD,IFI30,IGFBP4,IRF1,JUN,LGALS3,LOXL2,LUM,MMP2,PLS1,SEPP1,SPP1,TAGLN,THY1,TUBB
MGEA5	1.535	enzyme	Inhibited	-3.280	bias	2.06E-10	ABLIM1,ACSS2,ADAM19,ARHGAP29,ARPC4,AZGP1,BNIP2,CAPN1,CASP2,CCNG2,CMTM8,DAB2,ELF1,EPHB3,ERBB3,FBLN1,FLNA,FN1,GLUL,HIPK2,ICK,IGFBP4,IGFBP5,ITGB5,ITGB7,ITPKB,JUN,LAMB1,LRIG1,MMP14,NOTCH2,PDHA1,PROM1,S100A6,SFRP5,TCF19,TGFBR2,TGFBR3,THBS1,VIM,WWTR1
estrogen receptor		group		-1.408		4.52E-10	ANXA1,AXL,C3,CAPG,CAV2,CD44,CD68,CDH11,CLDN3,CLDN4,COL5A1,COL6A1,COL6A2,CXCR4,DSC2,EDN1,ERBB2,ERBB3,FN1,LOXL2,LY6E,LYN,MMP14,MMP15,MSN,NEDD9,NT5E,PDGFA,POR,RGS2,SPARC,TGFBR2,TGFBR3,TJP3,TSC22D3,VIM,ZEB1
TGM2		enzyme	Activated	5.090	bias	1.72E-09	ACSS2,AMICA1,C3,CA2,CD74,CFP,CSRNP1,CYP4F3,EHD1,FCER1G,FERMT1,GM2A,IFI35,IRF9,ITGAM,LSP1,LY6E,MAFB,MMP2,NPC2,OAS2,PHLDA1,POR,SAMD9L,SAMHD1,SIRPA,SLC25A20,SLC9B2,SLPI,SPP1,STAT1,TAP1,THBS1,TNIP1,TYROBP,UBA7,XAF1
MAPK1		kinase	Inhibited	-3.057		3.03E-09	ADAR,APBB3,CCDC82,CCL5,CDK19,CFB,CTSB,DDX58,DSE,EHD1,ERAP1,FN1,HLA-E,IFI35,IFIH1,IRF9,ITPR2,LGALS3BP,MAPK13,NT5E,OAS2,PARP12,PLD1,PSMB8,SAMHD1,STAT1,TAP1,TLR3,TRIM5,USP18,WIPF1,ZC3HAV1
CTNNB1		transcription regulator	Activated	2.801	bias	6.17E-09	AIM1,AKAP13,ALDH3A2,APOD,AXIN2,CD44,CDH11,CNN2,ECM1,EDN1,EPCAM,EPHB3,F13A1,FN1,GPX2,HTRA1,IGFBP5,LGALS3,MMP14,MMP2,PLS3,SERPINA3,SERPINA5,SGK1,SOX9,TSPAN8,VCAN,VIM,ZEB1	29 (2)
CEBPA		transcription regulator		1.886	bias	2.95E-08	ACSL1,ANPEP,ANXA1,C3,C3AR1,CA2,CSF1R,CSF2RA,CXCR4,EPHX1,ITGAL,ITGAM,ITGB5,KLF5,OAS2,PFN2,PTPRC,RAB31,RGS2,SERPINF1,SPP1,TANK,TBXAS1,THBD,VCL
ERBB2	2.281	kinase	Activated	4.025	bias	1.18E-07	ADAM19,ANGPTL4,BMP1,CDH11,CLDN4,COL18A1,COL1A1,COL5A1,COL6A3,CSF1R,EDN1,ERBB3,FASN,FN1,IGFBP5,JUN,MAPK13,MKI67,NCAPD2,NEDD9,PIK3CD,PMEPA1,POLD1,RAB31,SMC2,SOX4,TAGLN,TGIF1,THBS1,TOP2A
FOXA1		transcription regulator	Inhibited	-2.054		3.24E-07	AGR2,ANXA1,COL18A1,DSE,EPHX1,ERBB3,FSTL1,HNF4A,LYN,MGP,PAM,PISD,SLPI,SOX9,TF,TNFRSF12A,TRIM2
TCF		group				4.64E-07	AIM1,AKAP13,ALDH3A2,APOD,CD44,CNN2,ECM1,EPCAM,EPHB3,F13A1,GPX2,HTRA1,LGALS3,MMP2,PLS3,SERPINA3,SERPINA5,TSPAN8
AR		ligand-dependent nuclear receptor	Activated	2.009	bias	4.68E-07	ARMCX2,AZGP1,CAV2,CKAP4,CTSO,EGR1,ERBB2,HSPH1,IGF1R,MCM4,PIGR,PLS3,PMEPA1,PROS1,STAT1,TGFBR2,THBS1,TMPRSS2,TNFRSF12A,VCAN,WEE1,WIPF1
IL27		cytokine	Activated	2.898	bias	5.52E-07	B2M,CCL5,CD14,CD163,CIITA,EMR1,HLA-A,HLA-DQA1,HLA-DRA,HPGD,IRF1,ITGAM,MRC1,STAT1,TAP1	137 (9)
IL13		cytokine		-0.009	bias	5.55E-07	ACADVL,ADAM15,ATF3,C3,C3AR1,CCL5,CD14,CD163,CD37,CISH,COL1A2,CXCR4,CYBB,F13A1,GAS7,GPX3,HTRA1,IFNGR1,IL13RA1,KCNJ15,MRC1,MUC5AC,PCM1,PDLIM2,PHLDA1,PID1,SERPINF1,SLA,SLC8A1,THBS1
SOX11		transcription regulator		1.213	bias	8.04E-07	ADAM9,AS3MT,CCL5,CD9,CNOT6,CXCR4,EGR1,ICK,IFIH1,ITGA4,LGALS9B,NIPSNAP1,NREP,PDGFA,STAT1,TIAM1,TP53INP1
WISP2		growth factor	Inhibited	-2.885		8.67E-07	CD44,ERBB2,FN1,IGFBP7,JUN,LAMB3,PROCR,SPARC,TGFBR2,TGFBR3,VIM,ZEB1
RELA		transcription regulator	Activated	2.950	bias	9.89E-07	ARHGDIB,B2M,CCL5,CD44,CIITA,COL1A1,CXCR4,EDN1,EHF,ELF3,ERAP1,ERBB2,FCGRT,IRF1,KIT,LYN,NFKB2,PLD1,SLC1A2,SLC2A5,TAP1,TAP2,TAPBP,VCAM1,XIAP	103 (5)
FSH		complex		-0.390		1.27E-06	ACTA2,ACTB,ADCY7,ALDH3A2,ARL6IP5,ARPC4,ATPIF1,AXL,BMPR1A,CD55,COL15A1,COL18A1,CREM,CTNND1,CXCR4,DAB2,EFNA1,ENC1,FDXR,FILIP1L,GCLC,GPR56,ITGB5,ITPR1,MMP2,MYRF,NPC2,PIK3CD,PSMD1,RAB31,RASSF2,RGS12,SGK1,STAT1,TGFBR3,THBS1,VCL,ZEB1
NFkB (complex)		complex	Activated	3.938	bias	1.47E-06	BAX,C3,CASP8,CCL5,CD44,CIITA,CLU,CXCR4,DMBT1,DTX3,EHF,ELF3,EMR1,ERAP1,ERBB2,FUCA1,HNF4A,IRF1,KIT,LSP1,MMP2,NFKB1,NFKB2,NFKBIZ,NUMBL,SLC2A5,SOAT1,TAP1,TCF12,TNIP1,VCAM1,XIAP	110 (6)
TP53		transcription regulator		0.128		2.02E-06	ACTA2,ACTB,ADRBK2,ANXA1,ANXA4,APAF1,APOE,ARL6IP1,ATF3,AXIN2,BAX,BCL2L11,CASP8,CAT,CCNG1,CD47,CHD3,CLU,COL18A1,ELF4,FAM3C,FASN,FDXR,GLB1,HLA-DQA1,HSPA8,IGF1R,IGFBP7,LGALS3,MAP4,MCM3,MCM4,MCM6,MED13L,MMP2,NFKB2,PHLDA3,POLD1,PRKAB1,PRKAB2,PROM1,RPS6KA1,SCP2,SHISA5,SIRT6,SMC2,SMC4,TAGLN2,TANK,TAP1,TAP2,TCF7L2,TGFBR2,TNFRSF1B,TOP2A,VCAN,XPO1,YWHAH,ZEB1
DICER1		enzyme		0.508		2.39E-06	ANGPTL4,ANPEP,CD44,COL18A1,CPEB2,CXCR4,EPCAM,PELI2,PROS1,SERPINF1,SLC40A1,SLC4A4,SPARC,THBS1,VIM
P38 MAPK		group	Activated	2.845	bias	4.09E-06	ATF3,CCL5,CCNG2,CD44,CD55,COL3A1,DUOX2,EGR1,FLNA,FN1,GCLC,IRF6,JUN,MAP4,MMP2,MUC5AC,MYH11,NFKB1,STAT1,TJP2,TNIP1,TOP2A	191 (13)
ATG5		other		-0.625	bias	4.95E-06	APP,BCL2L11,BMF,CASP3,CASP7
IL1B		cytokine		1.778	bias	5.25E-06	AMPD3,APOE,BMF,C3,CAT,CCL5,CCR2,CIITA,COL1A1,CTSS,CXCR4,EDN1,EGR1,EHF,ELF3,HEXB,HLA-DRA,HNF4A,IRF1,ITGAM,LCP1,MUC5AC,NFKB1,NFKBIZ,NR4A2,SERPINA3,TLR3,VCAM1	89 (8)
SYVN1		transporter	Activated	4.238	bias	5.26E-06	ADAM9,APP,AXL,CD44,CYB561,CYP1B1,DAB2,DPYD,FANCG,FASN,HLA-A,IFITM2,IGF1R,L1CAM,LGALS3BP,MYOF,NFKB2,RAB34,SCARA3,SLC39A10,SLC43A2,SLC6A6,ZC3HAV1
TCF4		transcription regulator				6.84E-06	EDN1,GLI1,JUN,MIA,SGK1,SOX9,TCF7L2,VCAN,ZEB1
ERK1/2		group		0.486	bias	7.17E-06	B2M,CAT,CCL5,CD44,COL3A1,CXCR4,EGR1,HLA-A,IGF1R,JUN,MMP2,MUC5AC,PSMB8,PTN,RAB4B,SGK1,TAP1,TAP2,TAPBP,VCAM1	131 (9)
IDH2		enzyme				9.02E-06	CLDN3,EGR1,FN1,VIM,ZEB1,ZEB2
TCR		complex		1.338	bias	1.18E-05	ABLIM1,APOD,BCL2L11,CD200,CISH,CTSB,CXCL13,CXCR4,DDX58,FLNA,GRIA3,IFIH1,ITGB7,JUN,NFKB2,PIK3CD,PIK3R1,PIK3R3,PTPRC,STAT1,TLR3,TNFRSF12A,ZC3HAV1,ZNFX1	106 (7)
SPI1		transcription regulator				1.19E-05	C1QC,CD68,CIITA,CSF2RA,CTSS,CYBB,DUSP6,FCGRT,FES,IRF9,PSMB8,VAV1
NEUROG1		transcription regulator		-1.069		1.23E-05	ADD3,C3,CFH,COL3A1,FAM65B,FN1,GAS2,GFPT2,LCP1,LRIG1,MEST,SERPINF1,THBS1,TSPAN7
ZNF148		transcription regulator		-0.480	bias	1.42E-05	FN1,ITGAM,STAT1,VIM
NUPR1		transcription regulator	Inhibited	-3.641	bias	1.73E-05	ABCC5,APOBEC3B,AS3MT,ATF3,ATP8B1,ATR,BCL9,CASP2,CCDC77,CD68,CDCA3,CNPY4,COL1A2,COL3A1,CTPS2,CXADR,CXCR4,ERMP1,FUCA1,GABBR1,GBP2,GPR56,HLTF,IGF1R,IL13RA1,IRF2BP2,LMAN2L,LRRC16A,MKI67,MKL2,MYH10,NAAA,NAPEPLD,PCYOX1,PEA15,PHLDA1,PIK3R1,PMP22,PRR12,RAB32,SAMHD1,SGK223,SLC25A20,SLC6A6,SPG7,ST6GALNAC6,STX3,SUOX,TMEM194A,TNIP1,UAP1,VPS45,ZC3HAV1,ZDHHC13,ZMYM3
IDH1		enzyme				1.88E-05	CLDN3,EGR1,FN1,VIM,ZEB1,ZEB2
IL10		cytokine		1.551		2.59E-05	BMPR1A,CASP3,CASP8,CCL5,CD14,CD163,CD44,CD68,DCN,FCGR2B,HPGD,ITGAL,TLR3,TNFRSF1B,VCAN	138 (9)
PRKCD	1.365	kinase	Activated	2.418	bias	3.30E-05	CIITA,COL1A1,COL1A2,GLI1,ITGAM,KLF5,MMP2,MUC5AC,NFKB2,VCAM1	78 (6)
TP63		transcription regulator		-0.658	bias	3.41E-05	APAF1,BAX,BCL2L11,CASP3,COL5A1,FASN,FBN1,FN1,GPX2,IGFBP6,IGFBP7,ITGA4,L1CAM,LYN,POSTN,RAC2,TAGLN,THBS1,VIM,WEE1,ZEB1
IRF2		transcription regulator				3.67E-05	B2M,CIITA,ERAP1,PSMB8,PSME1,TAP2,TAPBP	10 (2)
IFNA2		cytokine	Activated	3.780	bias	3.89E-05	BAX,CISH,DDX58,GBP2,IFI35,IFIH1,IFNAR2,IRF1,IRF9,LGALS3BP,LY6E,OAS2,PARP12,STAT1,USP18,ZC3HAV1	24 (2)
MITF		transcription regulator	Activated	2.178	bias	3.96E-05	ALCAM,CCNG2,CD44,COL1A1,FBXO32,MGP,MMP14,SOX9,TXNIP
GH1		growth factor		1.698	bias	6.28E-05	ATF3,CAT,EGR1,GCLC,GHR,ZFP36
CNOT7		transcription regulator				7.13E-05	B2M,IFI35,LGALS3BP,OAS2,PARP12,PSMB8,STAT1,TAP1,TAP2	17 (2)
IFNB1		cytokine	Activated	2.234	bias	9.39E-05	CASP3,CASP8,IFIH1,IFNGR1,IRF1,IRF9,OAS2,STAT1,TLR3	16 (2)
PDLIM2	2.458	other		-1.000		9.39E-05	C4orf19,FSTL1,GHDC,GHR,KIT,LGALS3BP,MECOM,MPZL2,MYL9,PDLIM2,PHLDA1,PHLDA3,SCARA3,SLC40A1,TAGLN,TXNIP
Hdac		group	Inhibited	-2.819	bias	1.01E-04	ATF3,CCNG2,CSF1R,CSF2RA,EGR1,ERBB2,FBXO32,JUN,SPP1,TGFBR2,TXNIP
MAP3K7		kinase	Inhibited	-2.813	bias	1.22E-04	CCL5,CFB,GBP2,IFIH1,ITGB5,JUN,MUC5AC,RGS2,XAF1	96 (6)
EIF2AK2		kinase	Activated	3.450	bias	1.23E-04	CEBPD,DDX58,GABBR1,IFI35,IFITM2,LGALS3BP,NEDD9,PARP12,SAMHD1,STAT1,USP18,ZC3HAV1
STAT1	2.633	transcription regulator				1.24E-04	AGT,CD14,CIITA,DUOX2,FCER1G,IRF1,OAS2,PTN,STAT1,TAP1,TLR3
NR3C1		ligand-dependent nuclear receptor		1.324	bias	1.26E-04	ANGPTL4,ANXA1,APOE,ATP1B1,BCL2L11,BMF,BRE,CASP7,CCL5,CSRNP1,DUSP16,ELMOD3,EMP1,ENC1,FN1,GLUL,IFIH1,IFT122,IGF1R,IRF1,NAIP,NFKB1,NFKB2,PARP4,PEA15,PIK3CD,PIK3R1,PIK3R3,RGS2,SGK1,SH3KBP1,SLC19A2,SOX4,SPP1,STK17B,THBD,TNFRSF12A,TNFRSF1B,TNFRSF21,TSC22D3,VCAM1,YWHAH
IRF1	2.054	transcription regulator				1.44E-04	B2M,CASP8,CIITA,CYBB,ERAP1,PSMB8,PSME1,TAP1,TAP2,TAPBP
PPARG		ligand-dependent nuclear receptor		-0.296	bias	1.51E-04	ACTA2,ANGPTL4,APP,CAV2,COL1A1,COL1A2,FN1,IGFBP5,IGFBP6,PLIN2,TGFBR2
ESR1		ligand-dependent nuclear receptor		0.470	bias	1.51E-04	ABCC5,AGT,AHNAK,C1QTNF6,C3,CAV2,CCNG2,CD55,CTSB,CYP1B1,EDN1,EFEMP1,EFNA1,ERBB2,FOSL2,ICOSLG/LOC102723996,IGF1R,JUN,LEPR,MKI67,MUC5AC,POR,PRR15L,PRSS23,SEMA3B,SGK1,TSC22D3,VIM
NEDD9	2.529	other	Activated	2.828	bias	1.57E-04	APP,ELF3,ERRFI1,KIT,LRP1,MKNK2,PLAC8,PLIN2,TXNIP
TWIST2		transcription regulator	Activated	2.415	bias	1.65E-04	CD44,FN1,POSTN,VIM,ZEB1,ZEB2
DEF6		other	Activated	2.230	bias	1.69E-04	FN1,MMP2,VIM,ZEB1,ZEB2
PRDM1		transcription regulator	Inhibited	-2.186	bias	1.69E-04	BCL2L11,CIITA,ERAP1,PSMB8,TAPBP
EBI3		cytokine	Activated	2.621	bias	1.76E-04	B2M,CIITA,HLA-A,HLA-DQA1,HLA-DRA,STAT1,TAP1	15 (2)
CHI3L1		enzyme				1.76E-04	CDH11,COL16A1,COL6A1,COL6A2,EMP1,IGFBP5,TGFBR2
Lh		complex		-1.296		1.92E-04	ACTA2,ACTB,ADCY7,ARL6IP5,ARPC4,ATPIF1,AXL,CD55,COL15A1,COL18A1,CTNND1,CXCR4,DAB2,FDXR,GPR56,ITGB5,ITPR1,MMP2,NPC2,PIK3CD,PSMD1,RAB31,RGS12,SGK1,STAT1,THBS1,VCL
SF1		transcription regulator		-0.061		1.93E-04	ACTA2,COL1A1,FN1,MYL6
ETV5	2.200	transcription regulator				2.00E-04	ALCAM,CLDN3,CLDN4,FN1,KRT23,MMP2,TJP2,TJP3,ZEB1
IL6		cytokine		0.831	bias	2.18E-04	AGT,ALB,BAX,C3,CD163,CEBPD,CLU,DCN,ITGB5,KIT,MMP2,NFKB1,PDGFA,SERPINA3,SGK1,THBS1,VCAM1	38 (2)
Mek		group		0.189	bias	2.18E-04	AXL,BCL2L11,BMF,DDR1,DUSP6,EGR1,ERBB2,ERBB3,ETV5,FASN,JUN,PDGFRA,PHLDA1,VIM,ZEB1
TAB1		enzyme	Inhibited	-2.646	bias	2.45E-04	CCL5,CFB,GBP2,IFIH1,JUN,RGS2,XAF1
USF1		transcription regulator		1.969	bias	2.52E-04	AGT,B2M,CCNG2,CIITA,FASN,FBXO32,PIGR,SPP1,TXNIP
MAP2K1/2		group		1.480	bias	2.52E-04	ATF3,BCL2L11,C3,EGR1,ELN,KLF5,PDGFA,PHLDA1,VIM
BCL6		transcription regulator	Activated	2.157	bias	2.64E-04	ALCAM,BLNK,CD44,CIITA,COL1A1,DUSP6,FCGRT,IRF9,MGP,NFKB1,SOX9
HNRNPA2B1		other				2.69E-04	ACSL5,CP,CRIP1,DSE,ELOVL7,ERBB3,FN1,HIPK2,LEPR,MAST4,MEST,PBX1,PHACTR2,SEMA3B,SFI1,SLC1A2,SRPX,TOX3,VCAN,VIL1
SATB1	4.447	transcription regulator		-1.500		3.64E-04	CDK19,CYBB,EPSTI1,FAM65B,HELZ2,HSPA8,HVCN1,IKZF1,IRF8,NR4A2,PIK3IP1,RASGRP2,SGK1,TSC22D3,XAF1
ERN1		kinase				3.91E-04	CYP1B1,EPCAM,ITGB6,MPZL2,OAS2,PROS1,SPARC,SYT11,TMPRSS2
PAF1		other	Activated	3.162	bias	3.95E-04	CCL5,DDX58,FAM46A,HELZ2,NFKBIZ,OAS2,PNP,ZC3HAV1,ZFP36,ZNFX1
ATG7		enzyme		0.000	bias	4.28E-04	BCL2L11,BMF,CASP3,CASP7
PDGFRA	2.026	kinase				4.28E-04	ACTA2,COL1A1,DAB2,PDGFRA
IgG		complex	Inhibited	-2.573	bias	4.77E-04	ATP1B1,B2M,CCL5,CD9,CEBPD,CLDN4,DEGS1,EDN1,EMP1,FCGR2B,GPR56,HLA-E,LGALS3,PEA15,PLS3,TAPBP,ZFP36
SOX9	4.606	transcription regulator				4.78E-04	DMBT1,GAS7,GDF10,MIA,TCF7L2
FGF2		growth factor		0.322	bias	5.55E-04	BAX,BGN,CXCR4,DCN,EGR1,FUT2,TGFBR3,VIM
Growth hormone		group		1.938	bias	5.67E-04	ANGPTL4,CISH,DDR1,FOSL2,NEDD9,PDK4,PIK3C2B,SGK1,TXNIP,ZEB2
LGALS3	2.460	other				5.87E-04	COL3A1,COL5A2,CTSF,CTSH,DUSP6,IGFBP5,MGST1,MUC5AC,VCAM1
PDGF BB		complex	Activated	3.590	bias	6.82E-04	ATF3,CD44,DAB2,DUSP6,EDN1,EGR1,JUN,NR4A2,PHLDA1,RGS2,SGK1,THBS1,ZFP36
IGF1		growth factor		0.321	bias	7.11E-04	BAX,BCL2L11,ELN,FN1,IGF1R,ITGB5,PSMB8,TAP1,TAP2,VIM,XIAP	62 (5)
SPDEF		transcription regulator	Inhibited	-3.264	bias	7.11E-04	CDH11,COL16A1,COL1A1,COL5A1,COL5A2,COL6A1,COL6A2,COL6A3,SDC2,VIM,ZEB1
CCL5	10.644	cytokine	Activated	3.000	bias	7.11E-04	ALCAM,CD163,CD44,CD97,CYP1B1,DUSP6,EMP1,PNP,SGK1
FBN1	1.754	other	Inhibited	-2.219	bias	7.38E-04	COL1A2,COL3A1,COL6A3,FBN1,TGFBR2
ELF3	2.257	transcription regulator		1.188	bias	8.13E-04	EHF,ELF3,ERBB2,LYZ
IL1RN		cytokine	Inhibited	-3.450	bias	8.14E-04	ATF3,CIITA,CTSS,DDX58,HLA-DQB1,IFIH1,IRF1,IRF9,OAS2,RTP4,TCF7L2,USP18	91 (7)
KIAA1524		other		-0.777	bias	8.26E-04	CFB,COL15A1,DCN,DSC2,LUM,MFAP5,PDK4,RAB31,RHOC,SLC22A18,SLC25A4
TEAD		group				8.84E-04	CAV2,CD44,FN1
CYP2E1		enzyme				8.84E-04	CAT,GCLC,MGST1
SMC3		other				8.84E-04	HLA-DQA1,HLA-DQB1,HLA-DRA
miR-219a-5p (and other miRNAs w/seed GAUUGUC)		mature microrna				8.84E-04	CD14,PLCG2,TNFRSF1B
CDH1		other		-0.633		9.73E-04	ACTB,ERBB2,ERBB3,MMP14,SOX9,VIM,XIAP	33 (3)
miR-29b-3p (and other miRNAs w/seed AGCACCA)		mature microrna	Inhibited	-2.630	bias	9.73E-04	COL1A2,COL5A2,DCP2,FAM3C,GAS7,LOXL2,SPARC
CDKN1A		kinase		-0.149	bias	1.10E-03	APP,BAX,CTSB,GLB1,LGALS3BP,POLD1,PSAP,RRM1,SOX9,TOP2A
EPAS1		transcription regulator				1.12E-03	ANGPTL4,AXL,C1QA,CKB,CKMT1A/CKMT1B,CORO1A,EDN1,ITIH5,ITPR1,L1CAM,LOXL2,SOX9,TMEM45A
PGR		ligand-dependent nuclear receptor	Activated	3.214	bias	1.22E-03	ACSL1,AKAP13,ATP1B1,CD44,ERBB2,FN1,GLUL,GSTM3,KLF5,NEDD9,NPC1,RASSF2,SERPINA5,TSC22D3,VCAN,ZEB1	39 (3)
Pkc(s)		group	Activated	2.777	bias	1.28E-03	APP,BCL2L11,IRF6,JUN,MMP2,MUC5AC,RGS2,XIAP	111 (9)
PDX1		transcription regulator				1.28E-03	CD44,PAPSS2,PRSS23,SLIT3,TCF7L2,TGFBR3,TSPAN8,TXNIP
ERK		group	Activated	2.266	bias	1.42E-03	BMF,COL1A1,EGR1,GCLC,IFNAR2,JUN,MMP14,MMP2,MUC5AC,PDK4,STAT1,THBS1,ZFP36	129 (9)
TLR3	2.865	transmembrane receptor		1.941	bias	1.42E-03	C3,CCL5,CFB,DDX58,IFIH1,PIK3CD,PIK3R1,PIK3R3,SLPI,STAT1,TLR3,ZC3HAV1,ZNFX1	26 (3)
SMARCD3		transcription regulator	Activated	2.236	bias	1.55E-03	ALCAM,CD44,COL1A1,MGP,SOX9
T		transcription regulator	Activated	2.236	bias	1.55E-03	ALCAM,CD44,COL1A1,MGP,SOX9
FGF7		growth factor	Activated	2.197	bias	1.55E-03	CEBPD,FASN,IRF1,SCD,STAT1
TREM1		transmembrane receptor	Activated	2.706	bias	1.65E-03	ASPH,ATF3,ATP1B1,BRE,CCL5,CFB,CXCR4,EDN1,EGR1,ELOVL7,IRF1,NEDD4L,NPC1,NR4A2,NT5E,PHLDA1,PLAC8,PLD1,SPP1,THBD,THBS1	71 (5)
HSF1		transcription regulator		-1.462		1.75E-03	BAX,CHD3,CLU,COL18A1,CSRP2,EFEMP1,FASN,FBLN1,HSPA4L,HSPA8,HSPH1,ITGB5,MBOAT7,XAF1	49 (3)
HIF1A		transcription regulator	Activated	3.378	bias	1.78E-03	ADAM15,AGT,ANGPTL4,ANKZF1,APOE,AXL,BGN,CORO1A,CXCR4,CYP4F3,FN1,ITPR1,L1CAM,LOXL2,MMP2,PLAC8,PROM1,RAPGEF6,SOX9,TMEM45A,TMEM79
AMER1		other				2.11E-03	APAF1,AXIN2,BAX	59 (2)
ALB	6.493	transporter				2.11E-03	AGT,ALB,CYBA
mir-205		microrna				2.11E-03	ERBB3,VIM,ZEB1
MYOC		other				2.14E-03	ANXA1,CA2,CD44,CDH11,DAB2,FBN1,FN1,GPRASP1,IGFBP5,SFRP1,TGIF1
NLRC5	4.152	transcription regulator		1.981	bias	2.21E-03	B2M,HLA-A,HLA-E,TAP1
CLCA2		ion channel		0.000	bias	2.21E-03	CASP3,CASP8,FN1,VIM
PRKAR1A		kinase		-0.152		2.21E-03	ERBB2,ERBB3,NR4A2,TUSC3
TNFSF11		cytokine				2.21E-03	CD14,CSF1R,ITGAL,STAT1	13 (2)
PRKCA		kinase	Activated	2.607	bias	2.31E-03	ARHGDIB,CTSB,EGR1,ERBB2,FN1,JUN,MUC5AC,PLD1,VCAM1	109 (9)
CXCL12		cytokine		-1.609	bias	2.31E-03	ARPC4,BAX,BMP1,CD44,CXCR4,ERBB2,JUN,LOXL2,SORBS3	78 (6)
SREBF1		transcription regulator				2.31E-03	ALOX12,ELOVL7,FASN,LGALS3,OAT,PLS3,SCD,SORBS3,TF
SP1		transcription regulator		1.091	bias	2.54E-03	ATF3,BAX,CAT,CEBPD,CIITA,COL1A1,EGR1,FES,FN1,HADHA,HNF4A,IFNGR1,IL2RB,JUN,KIT,MAOB,MMP2,MUC5AC,PROCR,PROM1,PTN,SPP1,STAT1,TGFBR2,VIM
TP73		transcription regulator	Activated	3.330	bias	2.77E-03	ACTA2,BAX,CCNG2,COL5A2,FASN,IGFBP4,IL4R,LIG1,MFAP3,PMP22,PROCR,SHISA5,THBS1,TNFRSF1B,TRIM32,TSPAN1
FANCC		other				3.10E-03	ATP1B1,MYOF,MYRF,OAT,PTPRC,SNX7,TBC1D9,UGT2B7,WWTR1
IFNL1		cytokine	Activated	3.162	bias	3.35E-03	ATF3,DDX58,IFI35,IFIH1,IRF9,LGALS3BP,OAS2,STAT1,USP18,ZC3HAV1
Akt		group		1.348	bias	3.61E-03	BMF,COL3A1,CXCR4,IGF1R,MMP14,MMP2,PEA15,VCAM1	47 (3)
GRHL2	1.682	transcription regulator				3.77E-03	ERBB3,ZEB1
ULK1		kinase				3.77E-03	CASP3,CASP7
TAC4		other				3.77E-03	MMP14,MMP2	37 (3)
DAB2IP		other				3.77E-03	CLU,EGR1
CALR	1.470	transcription regulator				3.77E-03	COL1A2,FN1
BECN1		other				3.77E-03	BCL2L11,BMF
FOXP1		other				3.77E-03	CSF1R,ITGAM
CCR2	2.793	g-protein coupled receptor				3.77E-03	APP,ITGAL
RFXANK		transcription regulator				3.77E-03	COL1A2,HLA-DRA
VIPAS39	1.390	other				4.02E-03	SPARC,THBS1,VWF
RUNX3		transcription regulator				4.02E-03	BCL2L11,CIITA,ITGAL
LOXL2	1.820	enzyme				4.02E-03	FN1,MMP14,VIM
F10		peptidase				4.02E-03	EGR1,MMP2,VCAM1	74 (6)
DNAJB6		transcription regulator				4.02E-03	AZGP1,SPARC,SPP1
Gm-csf		group		1.746	bias	4.05E-03	BAX,CASP2,CASP3,CD14,CD163,MRC1,XIAP
PTGS2		enzyme		1.477	bias	4.07E-03	ANXA1,BAX,CCL5,CD44,EGR1,ERBB2,ERBB3,ITGAL,MMP2	73 (5)
LGALS1		other		1.981	bias	4.72E-03	ACTA2,FN1,GLI1,IFNGR1	27 (2)
RFX5		transcription regulator				4.72E-03	B2M,CD74,COL1A2,HLA-DRA
PPARA		ligand-dependent nuclear receptor		1.732	bias	4.80E-03	ACSL1,ACSS2,C3,HMGCS2,IGFBP5,IGFBP6,PLIN2
TNFSF10		cytokine		0.861		4.90E-03	CASP8,CD14,ITGAM,JUN,XIAP
NFKB1	1.519	transcription regulator				5.40E-03	B2M,CCL5,CIITA,COL1A1,EHF,ELF3,FCGRT,IRF1,NFKB1,XIAP	42 (3)
RUNX1		transcription regulator				6.23E-03	ALB,BAX,CSF1R,MECOM,MYL9,SPP1
ZNF652		other				6.72E-03	TCF12,TGFBR2,VIM
MIA	4.170	other				6.72E-03	FN1,MMP14,SPARC
SMAD1		transcription regulator				6.72E-03	ACTA2,COL1A1,COL1A2
mir-19		microrna				6.72E-03	BCL2L11,PSAP,RAB13
RFXAP		transcription regulator				6.72E-03	COL1A2,HLA-DQA1,HLA-DRA
ELANE		peptidase				6.72E-03	CTSB,MMP2,MUC5AC	61 (5)
FOXO1		transcription regulator	Activated	2.795	bias	6.74E-03	APAF1,BCL2L11,CCNG2,EGR1,FBXO32,IGF1R,ITGB6,MCM5,SGK1,TXNIP
HNF1A		transcription regulator				6.78E-03	ABCC2,ALB,ANPEP,COQ7,CPQ,ELF3,FGL1,FUT8,GCNT3,GMDS,HGFAC,HNF4A,PAFAH2,SERPING1,TM4SF4
CD24		other	Activated	2.828	bias	7.52E-03	ADD3,APOBEC3B,ATF3,CTTN,ECM1,FRYL,LPP,MTUS1,SLC4A4,SMC4,THBS1,TOP2A,TRIM2
PI3K (family)		group		-0.317	bias	7.58E-03	BCL2L11,CCNG2,CXCR4,FASN,FBXO32,GCLC,GLI1,NFE2L2,TXNIP	15 (2)
CSF1		cytokine		1.067	bias	7.74E-03	BAX,CD163,FN1,STAT1,TNFRSF1B	39 (3)
EHF	4.642	transcription regulator		1.265	bias	8.31E-03	ANGPTL4,ANPEP,BLNK,EHF,GLB1,LYN,NOTCH2,SERPINA3,THBD,THY1
VDR		transcription regulator				8.64E-03	CD14,PDLIM2,THBD,UCP2
CCNK		kinase	Activated	2.390	bias	8.84E-03	ATR,CRELD1,MDC1,PLTP,TAF8,UCP2
SOCS1		other	Inhibited	-2.213	bias	8.84E-03	BAX,DDX58,IFIH1,IRF1,OAS2,TLR3	14 (2)
GAPDH		enzyme	Inhibited	-2.414	bias	8.84E-03	C2,FCER1G,IFITM2,OAS2,SPP1,STAT1
EGF		growth factor	Activated	2.019	bias	9.44E-03	CEBPD,DUSP6,EGR1,FASN,FUT2,MUC5AC,S100A10,TGFBR2
MDM2		transcription regulator		-1.584	bias	9.51E-03	CASP2,ELF4,HIPK2,IGF1R,LYZ
MYB		transcription regulator				9.51E-03	CXCR4,FN1,IGFBP5,JUN,VIM
MYC		transcription regulator	Activated	2.538	bias	9.56E-03	ALCAM,BAX,CCNG2,CD44,CLU,COL1A1,FASN,FBXO32,GCLC,HSPH1,JUN,MGP,PROM1,SCPEP1,SOX9,SPP1,TXNIP,USP54,XPO1
IRF8	3.207	transcription regulator				1.03E-02	B2M,CIITA,CYBB
ZBTB7A		transcription regulator				1.03E-02	DMBT1,MIA,PKM
ZAP70		kinase				1.03E-02	ANXA1,BCL2L11,TSC22D3
TGFBR2	1.935	kinase				1.06E-02	ALOX12,ANGPTL4,HPGD,JUN,MYOF,TCF12,TGFBR2,TXNIP,VCL
FOXO3		transcription regulator		1.986	bias	1.07E-02	APAF1,BCL2L11,CCNG2,EGR1,FBXO32,SGK1,TXNIP,VIM
HTR7		g-protein coupled receptor				1.09E-02	STAB1,THBS1
FGF21		growth factor				1.09E-02	EGR1,HMGCS2
ENTPD5		enzyme				1.09E-02	COL1A1,COL1A2
Ifn		group				1.09E-02	OAS2,STAT1
ROCK1		kinase				1.09E-02	APP,CD44
CYBB	2.488	enzyme				1.09E-02	CYBA,CYBB
MAPK7		kinase				1.09E-02	JUN,VIM
RNA polymerase II		complex				1.09E-02	ACTB,B2M,BLNK,CASP7,CDH11,CIITA,CXCR4,CYP1B1,ERBB2,FOSL2,MCM3,MMP2,PRR15L,SLC9A8
SIN3A		transcription regulator				1.16E-02	CCNG2,COL1A2,FBXO32,HLA-DRA,TXNIP
GLI1	2.718	transcription regulator	Activated	3.434	bias	1.24E-02	COL1A1,DEGS1,GRIA3,IGFBP7,MEST,MMP2,NREP,PAPSS2,RGS10,RPS6KA1,SPP1,TMEM79
MAPK9		kinase		0.788		1.34E-02	FASN,IRF9,LGALS3BP,LMO7,LSM3,MARCKSL1,PLIN2,SCD
STAT3		transcription regulator	Activated	2.197	bias	1.35E-02	AGT,DTX3,FN1,IRF1,MMP2,NR4A2,NUMBL,PTN,SGK1,STAT1,TNFRSF1B,VCAN,VIM,XAF1
SP3		transcription regulator				1.36E-02	ATF3,COL1A1,COL1A2,EGR1,JUN,MAOB,MMP2,MUC5AC,PROCR,STAT1,TGFBR2
PRKCE		kinase	Activated	2.236	bias	1.39E-02	EGR1,IL2RB,PDGFA,VCAM1,XIAP
IFN Beta		group				1.41E-02	CD74,FN1,IFNAR2,IRF9,OAS2,STAT1
ELF4	2.331	transcription regulator	Activated	2.000	bias	1.42E-02	CA2,CREM,KIT,PIK3C3
SPP1	43.186	cytokine		0.254		1.42E-02	BAX,BCL2L11,CD44,MMP2
HDAC1		transcription regulator				1.44E-02	AXIN2,BAX,CD44,COL1A2,CSF1R,RGS10,SPP1,TGFBR2,TOP2A
ITGB2		transmembrane receptor				1.47E-02	ITGA4,ITGAL,RAC2
PPP2CA		phosphatase				1.47E-02	BCL2L11,IRF1,ITGAL
miR-200b-3p (and other miRNAs w/seed AAUACUG)		mature microrna				1.47E-02	PTPN13,VIM,ZEB1
miR-218-5p (and other miRNAs w/seed UGUGCUU)		mature microrna				1.47E-02	CASP3,CTSB,PIK3C2A
S100A4		other				1.47E-02	MMP14,MMP2,VIM
MNT		transcription regulator				1.47E-02	CCNG2,FBXO32,TXNIP
KRAS		enzyme				1.50E-02	CASP2,DUSP6,ETV5,GLI1,LAMB3,NT5E,PLD1
IL4		cytokine		1.456	bias	1.57E-02	CD14,CD163,CISH,CXCR4,FCGR2B,FLT3LG,IL4R,ITGA4,KIT,MRC1,PIGR,VCAM1
JAK1		kinase	Activated	2.000	bias	1.77E-02	HLA-A,IRF1,MMP2,STAT1
SLC29A1		transporter		1.982	bias	1.77E-02	BAX,CCNG1,FDXR,TP53INP1
CTGF		growth factor		1.976	bias	1.77E-02	CD44,FN1,JUN,MMP2
COL18A1	1.812	other	Inhibited	-2.333	bias	1.91E-02	ANTXR1,EFNA1,FN1,JUN,MMP2,STAT1,THBS1,TNFRSF21,VWF
YAP1		transcription regulator	Activated	2.216	bias	1.94E-02	BAX,BCL2L11,EDN1,SOX9,TAGLN
IGF1R	3.054	transmembrane receptor		1.715	bias	1.94E-02	CCL5,CTNND1,IGF1R,ITGAM,PROM1
Rxr		group				2.01E-02	ANGPTL4,FURIN,POR
BCL6B		transcription regulator				2.01E-02	CASP3,CASP7,CASP8
CHRNA3		transmembrane receptor				2.01E-02	CASP3,NFKB1,STAT1
SREBF2		transcription regulator				2.01E-02	FASN,GTF2I,LRP1
IL21		cytokine		1.411	bias	2.04E-02	BCL2L11,CCL5,CXCL13,FCGR2B,MKI67,MMP2,PTPRC,TYROBP
Calcineurin protein(s)		complex				2.08E-02	BCL2L11,RGS2
GLIPR2		other				2.08E-02	ACTA2,VIM
FZD8		g-protein coupled receptor				2.08E-02	COL1A1,FN1
PDGFRB		kinase				2.08E-02	ACTA2,MYH11
HTATIP2		transcription regulator				2.08E-02	MMP2,SPP1
LCK		kinase				2.08E-02	ANXA1,ITGAL
APLN		other				2.08E-02	CAT,NCF1
mir-148		microrna				2.08E-02	ALCAM,PIK3IP1
mir-7		microrna				2.08E-02	IGF1R,PIK3R3
miR-192-5p (and other miRNAs w/seed UGACCUA)		mature microrna				2.08E-02	IGF1R,ZEB1
HAS2		enzyme				2.08E-02	ACTA2,CD44
XAF1	3.557	other				2.08E-02	CASP3,CASP8
IFT57	1.736	other				2.08E-02	CASP8,PENK
APC		enzyme				2.08E-02	AXIN2,SGK1
CRTC1		transcription regulator				2.08E-02	NEDD9,PER1
KLF11	3.666	transcription regulator				2.08E-02	CAT,MAOB
CDX2		transcription regulator				2.12E-02	FUT2,JUN,KLF5,S100G,SOX9,TCF7L2
ELAVL1		other				2.25E-02	ARG2,ATF3,DCN,FLNA,GSS,PCOLCE,PLCG2,WEE1
TWIST1		transcription regulator	Activated	2.000	bias	2.26E-02	BAX,CASP3,COL1A1,DCN,RHOC
CD40		transmembrane receptor	Activated	2.280	bias	2.36E-02	BAX,CCL5,FCGR2B,FLT3LG,IRF1,NFKB1,NFKB2,TAP1,TAP2,TAPBP,VCAM1
Creb		group				2.37E-02	CEBPD,CSF1R,CTSB,EGR1,MMP2,NEDD9,RGS2
SIRT1		transcription regulator		1.501	bias	2.62E-02	BAX,CCNG2,FN1,MMP2,ZEB1
CCL2		cytokine		1.000		2.62E-02	FOLR2,MMP2,NCF1,SLC40A1
SIN3B		transcription regulator				2.62E-02	CCNG2,COL1A2,FBXO32,TXNIP
IFN1@		other				2.63E-02	IRF1,IRF8,TLR3
SMAD7		transcription regulator				2.63E-02	BCL2L11,TAGLN,XIAP
PLAUR		transmembrane receptor				2.63E-02	CTSB,ITGAM,VIM
NFIX		transcription regulator				2.63E-02	POSTN,SERPINA3,SPARCL1
PIK3R1	3.119	kinase				2.63E-02	PIK3CD,PIK3R1,VCAM1
C3	2.235	peptidase				2.63E-02	C3,CD55,THBD
NOX4		enzyme				2.63E-02	BCL2L11,BMF,MMP2
CSF2		cytokine	Activated	3.000	bias	2.64E-02	BAX,CIITA,CYBB,DUSP6,FAM65B,FCGR2B,HSPH1,IRF5,ITGA4,PMP22
CLDN7	1.410	other		1.265		2.64E-02	AGT,ARHGDIB,CBX2,CD68,CKAP4,LGALS3,MMP2,PQLC3,TPK1,WIPI1
SMAD3		transcription regulator		1.954	bias	2.92E-02	CCNG2,COL1A2,COL3A1,FBLN1,GLI1,POR,VIM
EGR1	6.235	transcription regulator				3.01E-02	ATF3,COL1A2,FN1,PDGFA,THBS1
PTGES		enzyme				3.01E-02	ANXA1,EGR1,ERBB3,ITGAL,VIM
NFYA		transcription regulator				3.12E-02	ALB,APAF1,FASN,VWF
SRF		transcription regulator				3.29E-02	EGR1,FILIP1L,LMCD1,LRP1,MGST1,MYH11,MYL9,NR4A2,TAGLN,VCL
caspase		group				3.33E-02	APP,CD14
Ctnna		group				3.33E-02	AXIN2,CXCR4
HISTONE		group				3.33E-02	CIITA,HPGD
KCNN4		ion channel				3.33E-02	CCL5,TSC22D3
HSP90AA1	1.464	enzyme				3.33E-02	ADRBK2,FN1
FES	7.223	kinase				3.33E-02	ITGA4,ITGAM
mir-221		microrna				3.33E-02	KIT,PIK3R1
mir-130		microrna				3.33E-02	IRF8,MAFB
miR-141-3p (and other miRNAs w/seed AACACUG)		mature microrna				3.33E-02	VIM,ZEB1
miR-130a-3p (and other miRNAs w/seed AGUGCAA)		mature microrna				3.33E-02	MAFB,ZEB1
miR-126a-5p (and other miRNAs w/seed AUUAUUA)		mature microrna				3.33E-02	ADAM9,KIT
AKT3		kinase				3.33E-02	BCL2L11,BMF
SFRP4		transmembrane receptor				3.33E-02	AXIN2,VIM
LIPE		enzyme				3.33E-02	ACSS2,FASN
MAD2L2		enzyme				3.33E-02	EGR1,VIM
ZBTB7B		transcription regulator				3.33E-02	COL1A1,COL1A2
PSMD4		other				3.33E-02	CD14,MARCO
ITGAL	2.944	transmembrane receptor				3.33E-02	ITGA4,ITGAL
MS4A1		other				3.33E-02	BAX,XIAP
DAXX		transcription regulator				3.33E-02	CASP3,CASP8
PLAA		other				3.33E-02	ANXA4,CLU
Cg		complex		1.544	bias	3.34E-02	BAX,DUSP6,EGR1,EMP1,IL33,ITGA4,ITGB5,MMP2,PHLDA1,SLC4A4,XIAP
JUN	3.229	transcription regulator		0.600	bias	3.34E-02	ALOX12,BCL9,C3AR1,GCLC,JUN,MMP2,NFKBIZ,PEA15,SULF2,ZEB1,ZFP36
HGF		growth factor		0.460	bias	3.34E-02	CCL5,CCNG2,EGR1,ELF3,FAM3C,MMP2,PDGFA,RARRES2,TAGLN2,THBS1,VCAM1
IL12 (family)		group				3.35E-02	IRF1,IRF8,NFKBIZ
miR-21-5p (and other miRNAs w/seed AGCUUAU)		mature microrna				3.35E-02	APAF1,PIK3R1,TGFBR2
HSPA5		enzyme				3.35E-02	APP,CLU,HSPA8
miR-145-5p (and other miRNAs w/seed UCCAGUU)		mature microrna	Inhibited	-2.224	bias	3.44E-02	AHNAK,CES1,DDR1,TAGLN,TPM3
SBDS		other				3.53E-02	COL14A1,COL27A1,DPYD,EGR1,ERBB3,FBXO32,IGFBP7,IL4R,MAFB,SPP1
IL33	2.490	cytokine		0.975	bias	3.67E-02	APOE,ITGAM,LEPR,PLIN2
SUPT16H		transcription regulator				3.67E-02	EGR1,LOXL2,MSN,PDGFA
FOXA2		transcription regulator				3.67E-02	AGR2,EPHX1,HNF4A,PROS1
IL15		cytokine		0.647	bias	3.79E-02	IL2RG,JUN,PSMB8,TGFBR2,TYROBP,ZFP36
IL12 (complex)		complex		0.277	bias	3.79E-02	CD44,IRF1,ITGA4,ITGAL,MMP2,TGFBR2
let-7		microrna	Inhibited	-2.191	bias	3.90E-02	ACTA2,BMPR1A,FN1,NFKB1,VIM
Igm		complex				3.90E-02	BCL2L11,CD44,FCGR2B,NFKB1,NFKB2
NRXN1		transporter				3.90E-02	CD47,FBLN5,MGP,SOX9,THBS1
E2F1		transcription regulator				3.93E-02	APAF1,BCL2L11,CASP3,HLTF,MCM3,MCM5,MCM6,PPP1R13B,PPP1R3A,RFC2,RRM1,SMC4,STAM,THBS1,TOP2A,TP53INP1
IFNAR2	1.540	transmembrane receptor				4.17E-02	PSMB8,UBA7,USP18
TGFB2		growth factor				4.17E-02	EGR1,SCD,VCAN
HDAC6		transcription regulator		1.981	bias	4.28E-02	COL1A1,CYP1B1,JUN,VIM
BMP7		growth factor		0.404		4.28E-02	ACTA2,IGF1R,IGFBP4,IGFBP5
YY1		transcription regulator				4.28E-02	CYBB,ERBB2,HLA-DRA,SLC1A2
RARA		ligand-dependent nuclear receptor				4.28E-02	MAOB,NEDD9,PENK,THBD
HMGB1		transcription regulator				4.28E-02	BAX,FGL1,MRC1,VCAM1
STAT5a/b		group		1.982	bias	4.39E-02	CISH,EMP1,LCP2,STK17B,XIAP
MAP2K1		kinase		1.982	bias	4.39E-02	ATF3,BCL2L11,DUSP6,GPR56,LGALS3
UXT		other	Inhibited	-2.207	bias	4.39E-02	ATR,HPGD,PMEPA1,SORD,TLR3
ETS		group				4.80E-02	C3AR1,JAK3
PURA		transcription regulator				4.80E-02	ITGAL,ITGAM
SERPINB2		other				4.80E-02	CASP7,CASP8
L1CAM	4.013	other				4.80E-02	FDXR,MMP2
AGT	3.808	growth factor				4.80E-02	COL1A1,EGR1
PLCD1		enzyme				4.80E-02	VIM,ZEB1
TSC22D3	1.899	transcription regulator				4.80E-02	BCL2L11,CCL5
mir-126		microrna				4.80E-02	ADAM9,KIT
PML		transcription regulator				4.80E-02	CIITA,HLA-DRA
PRKRA		other				4.80E-02	PROS1,THBS1
FGFR2		kinase				4.80E-02	COL1A1,SPP1
UGCG		enzyme				4.80E-02	BAX,CASP3
NR3C2		ligand-dependent nuclear receptor				4.80E-02	SGK1,TSC22D3
MCAM		other				4.80E-02	FN1,VIM
TARBP2		other				4.80E-02	PROS1,THBS1
PBX1	1.580	transcription regulator				4.80E-02	TCF7L2,VCP
RXRG		ligand-dependent nuclear receptor				4.80E-02	ACAA2,PDK4
ADM		other				4.80E-02	BAX,CASP8
Jnk		group	Activated	2.789	bias	4.85E-02	APP,BCL2L11,EDN1,JUN,MMP14,MMP2,VCAM1,ZFP36
KDM5B		transcription regulator	Inhibited	-2.077	bias	4.86E-02	ARL6IP5,BBS9,CDCA3,EHD1,LGALS3BP,MCM3,NEDD9,PLS3,PTPLA,SOX9,TOP2A
HLX		transcription regulator		-1.000	bias	4.94E-02	CTSS,CYP1B1,EGR1,JUN

## Sheet: Upstream Regulators DOWN 1.5-fo
© 2000-2015 QIAGEN. All rights reserved.
Upstream Regulator	Fold Change	Molecule Type	Predicted Activation State	Activation z-score	Notes	p-value of overlap	Target molecules in dataset	Mechanistic Network
TRIB3		kinase	Activated	2.828	bias	2.76E-07	CTH,GARS,HERPUD1,MTHFD2,PCK2,PSAT1,PSPH,STC2
BRD4		kinase	Inhibited	-3.873	bias	4.60E-07	CCND1,DERL3,FADS1,FKBP11,KAT2A,KCNQ5,MTHFD1L,MYC,NAV1,NME1,RAI14,RRS1,SLC19A1,SLC7A2,SRM
ESR1		ligand-dependent nuclear receptor	Inhibited	-2.443	bias	2.02E-04	ADORA1,BCL2L2,CCND1,CEBPA,CEBPB,CXCL12,DDX21,EGF,EIF5A,GJB1,GJB2,GPAM,ID1,KLK3,MYC,OTUB2,PDCD4,RPRM,SCARB1,SIAH2,SLC7A2,SLC7A5,SMAD6,STC2,TMEM97
SYVN1		transporter	Inhibited	-4.243	bias	2.07E-04	ADCY9,AES,AMOTL2,CCND1,CTPS1,DAG1,HSPB1,PPP1R15B,PTPRJ,SLC1A5,SLC20A1,SLC30A1,SLC35C2,SLC3A2,SLC7A2,SLC7A5,SLCO4A1,TFRC
MXI1		transcription regulator	Activated	2.236	bias	2.38E-04	IARS,LARS,MTHFD2,SLC1A4,SLC7A1
ATF4	-2.010	transcription regulator	Inhibited	-2.401	bias	4.42E-04	CEBPB,MCL1,PCK2,PHGDH,PSAT1,PSPH
ELK1		transcription regulator	Inhibited	-2.000	bias	1.10E-03	MCL1,MTHFD2,NUPR1,SLC7A11,TPD52L1
RAB1B		other	Inhibited	-2.588	bias	1.20E-03	BET1,COPZ2,GORASP2,KDELR3,NAPA,RAB26,SERP1
ESR2		ligand-dependent nuclear receptor		-1.067	bias	1.45E-03	CCND1,CXCL12,GSTP1,KLK3,MYC,NDRG2,SCARB1
Mek		group	Inhibited	-2.907	bias	1.86E-03	ABCE1,CCND1,DDX21,GNL3,LYAR,MCL1,MYC,NOP58,PLCD1,PPAT,PUS7,SLC16A6
A2M		transporter	Inhibited	-2.236	bias	1.97E-03	ATF4,ATF6,CCND1,EIF2AK3,PPP1R15A
Hedgehog		group				2.62E-03	CCND1,KLK3,MYC
RPRD1B		other				2.80E-03	CCND1,MYC
EIF4F		complex				2.80E-03	MCL1,MYC
PXN		other				2.80E-03	CCND1,KLK3
miR-183-5p (miRNAs w/seed AUGGCAC)		mature microrna				2.80E-03	IDH2,PDCD4
FTH1		enzyme				2.80E-03	FTL,TFRC
NME1	-1.853	kinase				4.30E-03	BOP1,CCND1,GRSF1,NOP58,PA2G4,RAE1
FBXW7	-1.784	transcription regulator				4.40E-03	DTX1,MYC,NOTCH1
NRIP1		transcription regulator				4.40E-03	CCND1,OTUB2,SMAD6
MEMO1		other				6.77E-03	CCND1,MYC,STC2
ZMIZ2		transcription regulator				8.10E-03	CCND1,MYC
ACTL6A		other				8.10E-03	ETS2,MYC
CHRNA7		transmembrane receptor				8.10E-03	ID1,PPARD
ABCB7		transporter				8.10E-03	FTL,TFRC
ATAD2		enzyme				8.10E-03	CCND1,MYC
GDF2		growth factor				9.76E-03	CXCL12,ID1,SMAD6
GFI1	-5.399	transcription regulator				1.07E-02	CEBPA,ETS2,IL6R,MYC
GLI1		transcription regulator	Inhibited	-3.138	bias	1.08E-02	AKT1,CCND1,CDC34,CMPK2,EPB41L4B,GALNT2,KLK3,MTMR1,PDZRN3,SH2B3,TTC13
IL5		cytokine	Inhibited	-2.646	bias	1.26E-02	CEACAM1,GCLM,MKNK1,PPIF,SLC1A5,SNTB1,ZNF25
SREBF1	-1.535	transcription regulator				1.26E-02	GRSF1,MAT1A,PCK2,PPAT,RPLP0,RPS24,SUCLG1
GLI2		transcription regulator				1.34E-02	JAG1,KLK3,MYC
EIF4E		translation regulator				1.34E-02	CCND1,CEBPA,MCL1
PGR		ligand-dependent nuclear receptor	Inhibited	-2.282	bias	1.44E-02	CCND1,CEBPB,DDX21,EIF1AX,GAL,GOT1,GRB10,ID1,MYC,NDRG1,PPIF,SLC31A2
SNRK		kinase				1.56E-02	CCND1,MYC
RBCK1		transcription regulator				1.56E-02	CCND1,MYC
HNRNPA1		other				1.56E-02	KLK3,MYC
DNMT3B		enzyme		0.378		1.76E-02	ABCD1,AHCTF1,ESRP2,FBXL16,KDELR3,LONRF1,LXN,SLC30A1
LNX2		other				1.77E-02	JAG1,LFNG,NOTCH1
LGALS3		other				1.78E-02	CCND1,CTSV,NFATC2,PRKCZ,PRSS1,PRSS3
SRC		kinase		-1.934	bias	1.91E-02	AKT1,CCND1,ID1,MYC
PCDH11Y		other		-1.982	bias	2.27E-02	AES,AXIN1,CCND1,MYC
RNF31		enzyme	Inhibited	-2.000	bias	2.27E-02	ADORA1,CCND1,NR5A2,SCARB1
PIN1		enzyme				2.27E-02	CCND1,FBXW7,MCL1
MKNK1	-3.702	kinase				2.51E-02	MYC,TFDP1
IGF2BP1		translation regulator				2.51E-02	CDC34,CYFIP2
PKM		kinase				2.51E-02	CCND1,MYC
MS4A1		other				2.51E-02	MCL1,MYC
FSH		complex				2.78E-02	ADCY9,AMOTL2,CASP9,CYFIP2,DHRS3,DUSP3,ELL2,FDX1,GOT1,ING2,JMJD6,KIDINS220,MEF2D,PLCL1,RAB27A,RAB4A,RPRM,SCARB1,SMAD6,TFRC,TOB1,YBX3
CXCR4		g-protein coupled receptor				3.47E-02	CCND1,CXCL12,MYC
CARM1		transcription regulator				3.47E-02	FTL,MYC,SPINK1
AZGP1		transporter				3.47E-02	CCND1,CEBPB,MYC
KIAA1524		other		1.134	bias	3.54E-02	CRLF1,CRYAB,GRSF1,LRP4,LXN,PDE2A,TUBA4A
BMP10		growth factor				3.64E-02	ID1,SMAD6
PLSCR1		enzyme				3.64E-02	CCND1,MYC
RUNX3		transcription regulator				3.64E-02	AKT1,CCND1
ITGA5		transmembrane receptor				3.64E-02	CCND1,PTGER4
NDUFA13		enzyme				3.64E-02	CCND1,TFDP1
PRKCZ	-2.010	kinase				3.64E-02	PHGDH,PSAT1
ATF6	-2.501	transcription regulator				3.64E-02	LMAN1,MCL1
CSF1R		kinase				3.64E-02	CCND1,MYC
DDX17		enzyme				3.64E-02	CCND1,MYC
CDKN1B		kinase				3.64E-02	CCND1,MCL1
SMO		g-protein coupled receptor				3.64E-02	KLK3,MYC
CETP		enzyme				3.64E-02	HERPUD1,LCAT
MYC	-3.258	transcription regulator	Inhibited	-2.137	bias	3.97E-02	ALDH18A1,ATP13A2,CDC34,CYFIP2,DKC1,GCLM,HSPB1,LOC102724788/PRODH,MYC,ODC1,PDCD4,PDK1,PYCR1,SHMT2,SOX6
MAP2K1/2		group		-1.980	bias	3.97E-02	CCND1,HERPUD1,MYC,PPARA,SCARB1
Gsk3		group		-0.791	bias	4.06E-02	ATF4,CCND1,MYC,SREBF1
SND1	-2.086	enzyme				4.06E-02	ID1,JAG1,PTPRN2,SLCO4A1
miR-124-3p (and other miRNAs w/seed AAGGCAC)		mature microrna				4.17E-02	NR3C2,SERP1,SUCLG2
mir-21		microrna				4.17E-02	IRAK1,PDCD4,PPARA
RBL2		other				4.61E-02	CCND1,MYC,PA2G4,VEGFB
PDGF BB		complex	Inhibited	-2.828	bias	4.72E-02	CBX4,CEBPB,IER2,MCL1,MYC,PLK2,PPP1R15A,TOB1
FANCC		other				4.74E-02	CXCL12,JAG1,NR3C1,NUAK1,SYPL1,TOM1L1
Alpha catenin		group				4.92E-02	KLK3,MYC
IL6R	-1.588	transmembrane receptor				4.92E-02	ABCC1,MCL1
STAT5B		transcription regulator				4.92E-02	CCND1,MYC
CDK8		kinase				4.92E-02	CTNNBIP1,MYC
PLD2		enzyme				4.92E-02	PRKCZ,SCARB1

## Sheet: Pathways Comparison 1.5-fold
© 2000-2015 QIAGEN. All rights reserved.	DE_Ptf1a_cKO 2wk-3KO_edgeR 01-08-2015 UP - 2015-01-20 08:52 AM	Downreg genes 012015 - 2015-01-20 09:46 AM
Canonical Pathway	-log P-value UP	-log P value Down
Hepatic Fibrosis / Hepatic Stellate Cell Activation	11.6800081039745	-0.0
Complement System	8.55156923638843	-0.0
Unfolded protein response	0.56407615610191	7.83445763123309
Dendritic Cell Maturation	8.33608735687937	-0.0
iCOS-iCOSL Signaling in T Helper Cells	8.00517479779781	-0.0
Leukocyte Extravasation Signaling	7.87087181630174	-0.0
Virus Entry via Endocytic Pathways	7.27671675749908	0.258743617242618
UVA-Induced MAPK Signaling	6.7849280452395	0.68657707986068
Antigen Presentation Pathway	7.37972964163785
Production of Nitric Oxide and Reactive Oxygen Species in Macrophages	7.14362230216584	-0.0
Integrin Signaling	6.7312229684336	0.403911426298192
IL-9 Signaling	6.95729632018878
PI3K Signaling in B Lymphocytes	5.28406354634309	1.40053825091874
EIF2 Signaling	-0.0	6.58666339466867
Amyotrophic Lateral Sclerosis Signaling	6.56562273468011	-0.0
CD28 Signaling in T Helper Cells	6.53390823175387	-0.0
Death Receptor Signaling	6.43092954697113	-0.0
NRF2-mediated Oxidative Stress Response	4.38940617911286	1.72023346660768
IL-4 Signaling	4.74631234908268	1.31874104816357
Atherosclerosis Signaling	6.0299976243114	-0.0
Sphingosine-1-phosphate Signaling	4.61298416355034	1.12050155546502
Axonal Guidance Signaling	4.84392519683382	0.836976522056765
Macropinocytosis Signaling	5.16485574539431	0.281099221921576
LXR/RXR Activation	5.40936466445056	-0.0
Clathrin-mediated Endocytosis Signaling	5.39511630242309	-0.0
PKCθ Signaling in T Lymphocytes	5.37919169790676	-0.0
Docosahexaenoic Acid (DHA) Signaling	5.30743299708403	-0.0
Actin Cytoskeleton Signaling	5.07447311841186	-0.0
Fcγ Receptor-mediated Phagocytosis in Macrophages and Monocytes	5.04632758632576	-0.0
Superpathway of Serine and Glycine Biosynthesis I		5.00803125822777
Reelin Signaling in Neurons	4.29768353420488	0.565772829549961
Myc Mediated Apoptosis Signaling	4.07309668353045	0.66436899859279
IL-15 Signaling	4.68619755326965	-0.0
Endothelin-1 Signaling	3.97599104127877	0.668088339915221
ILK Signaling	4.64216269466936	-0.0
Paxillin Signaling	4.63937812224304	-0.0
Role of JAK1 and JAK3 in γc Cytokine Signaling	4.55025895262571	-0.0
Signaling by Rho Family GTPases	4.54002745518759	-0.0
tRNA Charging		4.53243710846103
Role of NFAT in Regulation of the Immune Response	4.45010345391241	-0.0
IL-8 Signaling	3.73177673452621	0.669273939169696
Rac Signaling	4.38890174126282	-0.0
Acute Phase Response Signaling	4.35897152951923	-0.0
Serine Biosynthesis		4.35138252450722
Estrogen-Dependent Breast Cancer Signaling	3.75992983717806	0.588216885162508
Interferon Signaling	4.32591747631559
IL-12 Signaling and Production in Macrophages	4.32482692725857	-0.0
FcγRIIB Signaling in B Lymphocytes	4.29180886996329	-0.0
PEDF Signaling	4.28917392853202	-0.0
Acute Myeloid Leukemia Signaling	3.38324357079951	0.89720916574789
Apoptosis Signaling	4.25299611450267	-0.0
PAK Signaling	4.25299611450267	-0.0
FXR/RXR Activation	2.8324602985651	1.35530513916824
Pancreatic Adenocarcinoma Signaling	3.23912863317218	0.878088706285237
Renin-Angiotensin Signaling	4.096759281748	-0.0
Role of Pattern Recognition Receptors in Recognition of Bacteria and Viruses	3.99239235571647	-0.0
Aldosterone Signaling in Epithelial Cells	2.28313562233866	1.69363402200869
Regulation of eIF4 and p70S6K Signaling	-0.0	3.96459338423183
Cdc42 Signaling	3.95592988205595	-0.0
Cardiac Hypertrophy Signaling	2.233784952246	1.69491484710669
fMLP Signaling in Neutrophils	3.65867270828076	0.262777868776877
NF-κB Signaling	3.89172207978696	-0.0
MSP-RON Signaling Pathway	3.79895773752937	-0.0
Lymphotoxin β Receptor Signaling	3.7657342233138	-0.0
Role of IL-17A in Arthritis	3.7657342233138
TNFR1 Signaling	3.70966036720662	-0.0
Molecular Mechanisms of Cancer	3.33677883900525	0.368508404005719
Colorectal Cancer Metastasis Signaling	3.16679163188087	0.52546070824038
TWEAK Signaling	3.66837206328565	-0.0
Type II Diabetes Mellitus Signaling	3.31104164490657	0.352243545569602
Agranulocyte Adhesion and Diapedesis	3.64926476380876	-0.0
Caveolar-mediated Endocytosis Signaling	3.63748575691901	-0.0
CD40 Signaling	3.61450865475475
Tec Kinase Signaling	3.6077334838784	-0.0
EGF Signaling	3.6073928813487	-0.0
Wnt/Ca+ pathway	1.56154357918782	1.9875783446805
JAK/Stat Signaling	3.0960345811314	0.434462122796965
Valine Degradation I	-0.0	3.53021396885887
eNOS Signaling	2.83795295480544	0.668958566090148
HER-2 Signaling in Breast Cancer	2.86936197600911	0.613460543998016
Intrinsic Prothrombin Activation Pathway	3.46884888703487	-0.0
Leptin Signaling in Obesity	3.03751938412954	0.421498206730707
Phospholipase C Signaling	3.16679163188087	0.287750595720117
PTEN Signaling	3.12810074911507	0.318279835395122
ErbB2-ErbB3 Signaling	3.01550245750188	0.42557332678514403
Glioblastoma Multiforme Signaling	2.13151656792535	1.23167913620508
Role of Macrophages, Fibroblasts and Endothelial Cells in Rheumatoid Arthritis	1.58885390352321	1.7734389545403
Glioma Invasiveness Signaling	2.94872158655512	0.411078257178716
Thrombin Signaling	2.51852994224191	0.810290788457795
FAK Signaling	2.83128853636983	0.468201360901464
IGF-1 Signaling	2.76161578559122	0.537670421656378
P2Y Purigenic Receptor Signaling Pathway	2.31679658102906	0.927361666629638
Type I Diabetes Mellitus Signaling	3.23912863317218	-0.0
IL-2 Signaling	3.22720409010936	-0.0
Tight Junction Signaling	3.21494700141852	-0.0
Proline Biosynthesis I		3.18875805037977
Phenylalanine Degradation I (Aerobic)		3.18875805037977
Non-Small Cell Lung Cancer Signaling	2.00022663353314	1.17415254464703
Role of Tissue Factor in Cancer	2.75160496316762	0.419847620880468
p53 Signaling	3.16941193897773	-0.0
Crosstalk between Dendritic Cells and Natural Killer Cells	3.15474423957662	-0.0
OX40 Signaling Pathway	3.15466514613035
Citrulline Biosynthesis	1.02699172248759	2.11550234165637
IL-17A Signaling in Airway Cells	3.05047782922459	-0.0
Prolactin Signaling	2.08241425155665	0.965229079116944
Mouse Embryonic Stem Cell Pluripotency	2.46028552105759	0.578722465377286
Growth Hormone Signaling	2.75406331600287	0.271549961740621
Role of Osteoblasts, Osteoclasts and Chondrocytes in Rheumatoid Arthritis	3.02231228565116	-0.0
Glucocorticoid Receptor Signaling	3.02162699216798	-0.0
p70S6K Signaling	2.31679658102906	0.685924381264819
Pyrimidine Ribonucleotides Interconversion	0.301034228874241	2.69513184976131
Chondroitin Sulfate Degradation (Metazoa)	2.98426772752537
Gap Junction Signaling	2.28313562233866	0.667873130553084
Xenobiotic Metabolism Signaling	2.48125704069763	0.463733868356922
UVB-Induced MAPK Signaling	2.12507629098127	0.774414105244771
CNTF Signaling	2.35626572975773	0.543179384707968
14-3-3-mediated Signaling	2.39036850804226	0.505215713629269
Granulocyte Adhesion and Diapedesis	2.87785938048324	-0.0
Endometrial Cancer Signaling	1.69535625323271	1.17953572955021
T Helper Cell Differentiation	2.86845258559387	-0.0
Superpathway of Citrulline Metabolism	0.626532949053829	2.2244444153599
Gαq Signaling	2.84784643203141	-0.0
RANK Signaling in Osteoclasts	2.83128853636983	-0.0
Germ Cell-Sertoli Cell Junction Signaling	2.82583351293255	-0.0
Induction of Apoptosis by HIV1	2.82040162852076	-0.0
Dermatan Sulfate Degradation (Metazoa)	2.81659428450818
PDGF Signaling	2.815652449427	-0.0
Folate Polyglutamylation		2.80911708926831
Angiopoietin Signaling	2.47294406831431	0.311787491484894
Pyrimidine Ribonucleotides De Novo Biosynthesis	0.26619100544823	2.51309719730954
CXCR4 Signaling	2.28313562233866	0.487668110266768
Telomerase Signaling	1.97647101313937	0.791594046333301
iNOS Signaling	2.76301835684807	-0.0
ERK/MAPK Signaling	1.93339663092627	0.822940495306854
mTOR Signaling	0.821863456262504	1.91145988611342
VEGF Signaling	1.48498724968843	1.24137653050895
TNFR2 Signaling	2.72279414028323
ErbB Signaling	2.42363494314284	0.29255379193463
LPS/IL-1 Mediated Inhibition of RXR Function	1.96278454849859	0.749008766310045
Glutathione Biosynthesis	1.90088660319474	0.804187339311471
Role of PI3K/AKT Signaling in the Pathogenesis of Influenza	2.69863799179855	-0.0
Endoplasmic Reticulum Stress Pathway	0.38769516446697694	2.30385899642461
B Cell Receptor Signaling	2.67710204360463	-0.0
Regulation of the Epithelial-Mesenchymal Transition Pathway	2.67024356877907	-0.0
Arginine Degradation VI (Arginase 2 Pathway)	1.25995328106951	1.40316508237289
Agrin Interactions at Neuromuscular Junction	2.36821037967328	0.29098020178626505
Erythropoietin Signaling	2.36821037967328	0.29098020178626505
Inhibition of Angiogenesis by TSP1	2.369679760181	0.271565015273743
GM-CSF Signaling	2.64006564098792	-0.0
Role of p14/p19ARF in Tumor Suppression	2.6280191443025
FLT3 Signaling in Hematopoietic Progenitor Cells	2.17324373730371	0.44782083574155007
Neuropathic Pain Signaling In Dorsal Horn Neurons	2.25462628701727	0.328197839315446
Prostate Cancer Signaling	1.08812982617064	1.49151364619085
Epithelial Adherens Junction Signaling	2.54603227771135	-0.0
STAT3 Pathway	2.54043382537472	-0.0
LPS-stimulated MAPK Signaling	2.54043382537472	-0.0
NF-κB Activation by Viruses	2.54043382537472	-0.0
γ-glutamyl Cycle	1.83911022765214	0.698859007821977
Thrombopoietin Signaling	2.52795612771323	-0.0
Huntington's Disease Signaling	2.08842808621144	0.43115296079485
Cysteine Biosynthesis/Homocysteine Degradation		2.51457094541138
Thiosulfate Disproportionation III (Rhodanese)		2.51457094541138
Glycine Degradation (Creatine Biosynthesis)		2.51457094541138
IL-15 Production	2.13130842299907	0.351739249243617
Role of NFAT in Cardiac Hypertrophy	1.89519932036993	0.570277997276884
Glioma Signaling	1.33654405306596	1.1213517730467
Cytotoxic T Lymphocyte-mediated Apoptosis of Target Cells	2.45178300107108	-0.0
Small Cell Lung Cancer Signaling	1.74307644600389	0.702019837460666
Ephrin A Signaling	2.41867259325362	-0.0
Tumoricidal Function of Hepatic Natural Killer Cells	2.39979416021626	-0.0
Role of PKR in Interferon Induction and Antiviral Response	2.38262821165519	-0.0
T Cell Receptor Signaling	2.37578913853618	-0.0
Cellular Effects of Sildenafil (Viagra)	1.76853627113826	0.605342231648685
Gα12/13 Signaling	2.35329720015767	-0.0
HGF Signaling	2.06650012011058	0.28573456357186006
GDNF Family Ligand-Receptor Interactions	2.31771538499434	-0.0
HMGB1 Signaling	2.31679658102906	-0.0
Notch Signaling	1.47958297226582	0.835236444725238
Arsenate Detoxification I (Glutaredoxin)	1.61931807469862	0.691187009792763
Retinol Biosynthesis	-0.0	2.27216889036196
NGF Signaling	1.99574278639716	0.270232246389946
Fc Epsilon RI Signaling	2.26540477230555	-0.0
Chronic Myeloid Leukemia Signaling	1.39407619254349	0.865067114660647
PPARα/RXRα Activation	1.88326058704306	0.366510783906687
Antiproliferative Role of Somatostatin Receptor 2	2.24651968868848	-0.0
RhoA Signaling	2.24546505947416	-0.0
Protein Kinase A Signaling	1.47975779875991	0.755069516156463
HIF1α Signaling	2.21566070096355	-0.0
Ceramide Signaling	2.20917815788122	-0.0
Superpathway of Inositol Phosphate Compounds	1.70223896748938	0.494118136030401
Netrin Signaling	1.38055988094408	0.776155089344169
GPCR-Mediated Integration of Enteroendocrine Signaling Exemplified by an L Cell	0.745059483785621	1.41035746782029
Protein Ubiquitination Pathway	0.285707559824848	1.85241438325222
Glycine Betaine Degradation	0.304483595315656	1.82061633271401
Graft-versus-Host Disease Signaling	2.1216002251839
Melanoma Signaling	1.71501590888208	0.38435864077369203
Choline Biosynthesis III	2.07391548144091
Insulin Receptor Signaling	0.467073510002008	1.60250082453705
Fatty Acid β-oxidation I	1.40090999758863	0.668276208327876
Phospholipases	1.60478937112235	0.45617012428219594
Tyrosine Biosynthesis IV		2.05373956033342
4-aminobutyrate Degradation I		2.05373956033342
Superpathway of Methionine Degradation	0.471135825681326	1.57990961647025
Antioxidant Action of Vitamin C	2.05093850959558	-0.0
Ovarian Cancer Signaling	1.30995334736985	0.737026019155275
VDR/RXR Activation	1.17104429981163	0.875640719820883
Triacylglycerol Degradation	-0.0	2.04364240241784
Melanocyte Development and Pigmentation Signaling	2.04093553986821	-0.0
IL-6 Signaling	2.01856059122776	-0.0
Nur77 Signaling in T Lymphocytes	1.74279419953805	0.26642192828804306
UDP-N-acetyl-D-galactosamine Biosynthesis II	0.93672130747621	1.07062641495077
CREB Signaling in Neurons	1.50555000339404	0.476952198909218
Sonic Hedgehog Signaling	1.97490028259145
Purine Nucleotides Degradation II (Aerobic)	0.895110788355946	1.07311710440216
Urate Biosynthesis/Inosine 5'-phosphate Degradation	1.21538698203163	0.745696392122656
Folate Transformations I		1.9574925242707
Leucine Degradation I		1.9574925242707
Regulation of Actin-based Motility by Rho	1.92358124486132	-0.0
TR/RXR Activation	1.61548212119982	0.29255379193463
Glutathione-mediated Detoxification	1.09842908887669	0.801434085879458
Relaxin Signaling	1.54819950688754	0.34900801664537
Allograft Rejection Signaling	1.89450840901259
Human Embryonic Stem Cell Pluripotency	1.88973056309729	-0.0
Purine Ribonucleosides Degradation to Ribose-1-phosphate	0.472260969408826	1.40316508237289
Proline Biosynthesis II (from Arginine)	0.472260969408826	1.40316508237289
Arginine Biosynthesis IV	0.472260969408826	1.40316508237289
Nitric Oxide Signaling in the Cardiovascular System	1.30865671558029	0.564716542449171
ErbB4 Signaling	1.87211756270086	-0.0
IL-10 Signaling	1.86687415718202	-0.0
PXR/RXR Activation	1.25797763535421	0.570629294896362
Retinoic acid Mediated Apoptosis Signaling	1.82571473732499	-0.0
Adipogenesis pathway	0.490239959677543	1.33321802380901
Cysteine Biosynthesis III (mammalia)	-0.0	1.81567284196839
Nicotine Degradation II	1.79175260922461
Neurotrophin/TRK Signaling	1.4967455072864	0.29098020178626505
Activation of IRF by Cytosolic Pattern Recognition Receptors	1.78058642083966	-0.0
Branched-chain α-keto acid Dehydrogenase Complex		1.76892080453268
Altered T Cell and B Cell Signaling in Rheumatoid Arthritis	1.75763401687986
Neuroprotective Role of THOP1 in Alzheimer's Disease	1.33399278086928	0.417490686152836
IL-3 Signaling	1.74307644600389	-0.0
Role of JAK1, JAK2 and TYK2 in Interferon Signaling	1.72919685405136
Hereditary Breast Cancer Signaling	1.17420442330949	0.55322406812748
Adenosine Nucleotides Degradation II	1.07054423050541	0.656092760491048
Autoimmune Thyroid Disease Signaling	1.71501590888208
Superpathway of D-myo-inositol (1,4,5)-trisphosphate Metabolism	0.320380101728925	1.38850964393537
RhoGDI Signaling	1.70837301735033	-0.0
Glutaryl-CoA Degradation	0.790047741990417	0.917939117425991
IL-17 Signaling	1.70377953507148	-0.0
Maturity Onset Diabetes of Young (MODY) Signaling	-0.0	1.65410389538972
ERK5 Signaling	-0.0	1.65217772664767
Ethanol Degradation IV	1.64343942810871
Isoleucine Degradation I	0.20978244850086103	1.4102324016638
Creatine-phosphate Biosynthesis	1.61931807469862
Arginine Degradation I (Arginase Pathway)	1.61931807469862
IL-17A Signaling in Fibroblasts	1.58726851384307	-0.0
Ephrin Receptor Signaling	0.973778827006413	0.612071242785245
VEGF Family Ligand-Receptor Interactions	1.20006530245302	0.38485035964829994
Natural Killer Cell Signaling	1.5830928022297	-0.0
Guanosine Nucleotides Degradation III	1.29887023855875	0.281541598510357
Tetrahydrofolate Salvage from 5,10-methenyltetrahydrofolate		1.56320408660118
Glutamate Degradation III (via 4-aminobutyrate)		1.56320408660118
CTLA4 Signaling in Cytotoxic T Lymphocytes	1.54885247951794	-0.0
Wnt/β-catenin Signaling	0.863971564699441	0.679820026153764
Tetrahydrobiopterin Biosynthesis II	0.730978442977229	0.804187339311471
Tetrahydrobiopterin Biosynthesis I	0.730978442977229	0.804187339311471
Methylglyoxal Degradation I	0.730978442977229	0.804187339311471
Estrogen Biosynthesis	1.53227672017116	-0.0
Primary Immunodeficiency Signaling	1.51620604540818
Colanic Acid Building Blocks Biosynthesis	1.21538698203163	0.260143491148747
3-phosphoinositide Biosynthesis	1.46609830894702	-0.0
B Cell Development	1.45961350084641
MIF-mediated Glucocorticoid Regulation	1.19359520732061	0.2581438730545881
CCR3 Signaling in Eosinophils	1.44275808775888	-0.0
Calcium-induced T Lymphocyte Apoptosis	1.43932459640061	-0.0
Inhibition of Matrix Metalloproteases	1.42905200189873
Tetrapyrrole Biosynthesis II	1.41681521028912
Galactose Degradation I (Leloir Pathway)	1.41681521028912
Acetate Conversion to Acetyl-CoA	1.41681521028912
Neuregulin Signaling	0.939306115115015	0.468201360901464
GDP-glucose Biosynthesis		1.40316508237289
D-myo-inositol (1,4,5)-Trisphosphate Biosynthesis	0.60955421509396	0.765255754856538
Phenylalanine Degradation IV (Mammalian, via Side Chain)	0.626532949053829	0.745696392122656
SAPK/JNK Signaling	1.36501250519777	-0.0
BMP signaling pathway	0.937801654482123	0.40891634357546
Renal Cell Carcinoma Signaling	1.07152214100129	0.271549961740621
Serotonin Receptor Signaling	0.260598644577645	1.0592740505387
Bladder Cancer Signaling	-0.0	1.31955255148193
Biotin-carboxyl Carrier Protein Assembly	0.620312251262214	0.691187009792763
L-cysteine Degradation I	0.620312251262214	0.691187009792763
Melatonin Degradation II	0.620312251262214	0.691187009792763
CD27 Signaling in Lymphocytes	1.30372070292193	-0.0
Granzyme B Signaling	1.07054423050541	0.22338571110342798
MIF Regulation of Innate Immunity	1.28924589772549	-0.0
Role of RIG1-like Receptors in Antiviral Innate Immunity	1.28924589772549	-0.0
Chemokine Signaling	0.789973364301093	0.490401604359018
Glucose and Glucose-1-phosphate Degradation		1.27300896636588
FGF Signaling	1.26876575963571	-0.0
Sertoli Cell-Sertoli Cell Junction Signaling	0.957567513335576	0.309953367549716
Superpathway of Melatonin Degradation	1.26532967156676	-0.0
GPCR-Mediated Nutrient Sensing in Enteroendocrine Cells	0.508266363044962	0.756766478470106
AMPK Signaling	1.26419358200162	-0.0
UDP-N-acetyl-D-glucosamine Biosynthesis II	1.25995328106951
Superoxide Radicals Degradation	1.25995328106951
Methylthiopropionate Biosynthesis		1.25708246499472
Threonine Degradation II		1.25708246499472
L-cysteine Degradation II		1.25708246499472
Role of NANOG in Mammalian Embryonic Stem Cell Pluripotency	1.24636715770318	-0.0
Systemic Lupus Erythematosus Signaling	1.24016057182252	-0.0
Hypoxia Signaling in the Cardiovascular System	-0.0	1.23357067370039
Cell Cycle: G1/S Checkpoint Regulation	-0.0	1.23357067370039
Aryl Hydrocarbon Receptor Signaling	0.736425357796908	0.479769739181137
Glutathione Redox Reactions I	1.00721343095538	0.20750540354018598
Regulation of IL-2 Expression in Activated and Anergic T Lymphocytes	0.842904370720968	0.36217207892003506
Sorbitol Degradation I	1.17904825027292
Xanthine and Xanthosine Salvage	1.17904825027292
UDP-N-acetyl-D-galactosamine Biosynthesis I	1.17904825027292
Sulfite Oxidation IV	1.17904825027292
Thiamin Salvage III	1.17904825027292
Glutamine Biosynthesis I	1.17904825027292
Nicotine Degradation III	1.16499504397101
Histidine Degradation III		1.16396126665854
Remodeling of Epithelial Adherens Junctions	1.16088678085169	-0.0
IL-22 Signaling	0.320380101728925	0.839820685703231
Bupropion Degradation	1.15182100660526
G-Protein Coupled Receptor Signaling	0.379157178907809	0.772304407888968
Salvage Pathways of Pyrimidine Ribonucleotides	-0.0	1.14438744165896
Oxidative Ethanol Degradation III	1.13964258391699
p38 MAPK Signaling	0.43090049543884196	0.700285397677175
Synaptic Long Term Potentiation	0.622259850650903	0.505215713629269
Coagulation System	1.10393623004576
Breast Cancer Regulation by Stathmin1	1.09867545040189	-0.0
Acetone Degradation I (to Methylglyoxal)	1.09842908887669
IL-17A Signaling in Gastric Cells	1.09842908887669
Heparan Sulfate Biosynthesis	-0.0	1.08523868660916
D-myo-inositol (1,3,4)-trisphosphate Biosynthesis	-0.0	1.07311710440216
1D-myo-inositol Hexakisphosphate Biosynthesis II (Mammalian)	-0.0	1.07311710440216
TREM1 Signaling	1.07152214100129	-0.0
Role of JAK2 in Hormone-like Cytokine Signaling	0.799029586720076	0.271565015273743
Extrinsic Prothrombin Activation Pathway	1.07054423050541
Melatonin Degradation I	1.05404435867637
Antiproliferative Role of TOB in T Cell Signaling	0.28300853249566	0.765255754856538
GNRH Signaling	0.478531744840937	0.568414056947626
D-myo-inositol-5-phosphate Metabolism	0.72129347862673	0.317555939889467
Communication between Innate and Adaptive Immune Cells	1.03611878311061
Sphingomyelin Metabolism	1.02699172248759
Sperm Motility	0.477812430637852	0.540839918729654
Corticotropin Releasing Hormone Signaling	1.01476912858424	-0.0
Urea Cycle	0.472260969408826	0.538623814140533
Adenine and Adenosine Salvage III	0.472260969408826	0.538623814140533
GDP-mannose Biosynthesis	0.472260969408826	0.538623814140533
Acetyl-CoA Biosynthesis I (Pyruvate Dehydrogenase Complex)	0.472260969408826	0.538623814140533
Calcium Signaling	1.00691941895096	-0.0
Cell Cycle Control of Chromosomal Replication	1.00069234187643
Dopamine Receptor Signaling	0.395920852013576	0.597137892728222
Tryptophan Degradation III (Eukaryotic)	0.442026208227457	0.547441823993716
Cell Cycle: G2/M DNA Damage Checkpoint Regulation	0.986556173972512	-0.0
April Mediated Signaling	0.983801858707718	-0.0
Pyrimidine Deoxyribonucleotides De Novo Biosynthesis I	-0.0	0.970410789595332
Triacylglycerol Biosynthesis		0.9700995975089
Glycine Biosynthesis I		0.968223778002799
Glutamate Degradation X		0.968223778002799
L-cysteine Degradation III		0.968223778002799
Proline Degradation		0.968223778002799
S-methyl-5-thio-α-D-ribose 1-phosphate Degradation		0.968223778002799
Epoxysqualene Biosynthesis		0.968223778002799
Putrescine Biosynthesis III		0.968223778002799
Glutamine Degradation I		0.968223778002799
Glutamate Biosynthesis II		0.968223778002799
β-alanine Degradation I		0.968223778002799
Amyloid Processing	0.954580666744927	-0.0
Toll-like Receptor Signaling	0.702675038019643	0.24477644434302503
Heme Biosynthesis II	0.93672130747621
Prostanoid Biosynthesis	0.93672130747621
Purine Nucleotides De Novo Biosynthesis II		0.917939117425991
B Cell Activating Factor Signaling	0.912019099713962	-0.0
Heparan Sulfate Biosynthesis (Late Stages)	-0.0	0.904414618899177
tRNA Splicing		0.899655323528175
Dopamine-DARPP32 Feedback in cAMP Signaling	0.460767975055078	0.431974174962953
Glycerol-3-phosphate Shuttle	0.892628427999771
Guanine and Guanosine Salvage I	0.892628427999771
Choline Degradation I	0.892628427999771
GDP-L-fucose Biosynthesis I (from GDP-D-mannose)	0.892628427999771
Taurine Biosynthesis	0.892628427999771
Fatty Acid Biosynthesis Initiation II	0.892628427999771
Palmitate Biosynthesis I (Animals)	0.892628427999771
Adenine and Adenosine Salvage I	0.892628427999771
Sulfate Activation for Sulfonation	0.892628427999771
Role of BRCA1 in DNA Damage Response	0.888101370562104	-0.0
Synaptic Long Term Depression	0.549920413425684	0.325169111647715
Ketogenesis	0.858565136785999
cAMP-mediated signaling	-0.0	0.840368646862366
Glycolysis I	-0.0	0.839820685703231
Estrogen-mediated S-phase Entry		0.839820685703231
4-1BB Signaling in T Lymphocytes	0.835190653525605
Semaphorin Signaling in Neurons	0.342514099429083	0.489065555324939
CDK5 Signaling	0.491150891865917	0.337370909881224
Sucrose Degradation V (Mammalian)	0.37469129801398104	0.4367493290497261
Airway Pathology in Chronic Obstructive Pulmonary Disease	0.37469129801398104	0.4367493290497261
Spermidine Biosynthesis I		0.804187339311471
Glutamate Degradation II		0.804187339311471
Hypusine Biosynthesis		0.804187339311471
S-adenosyl-L-methionine Biosynthesis		0.804187339311471
Trehalose Degradation II (Trehalase)		0.804187339311471
NADH Repair		0.804187339311471
Aspartate Biosynthesis		0.804187339311471
Fatty Acid β-oxidation III (Unsaturated, Odd Number)		0.804187339311471
5-aminoimidazole Ribonucleotide Biosynthesis I		0.804187339311471
Gluconeogenesis I	-0.0	0.801434085879458
Cholesterol Biosynthesis I		0.797248282044645
Cholesterol Biosynthesis III (via Desmosterol)		0.797248282044645
Cholesterol Biosynthesis II (via 24,25-dihydrolanosterol)		0.797248282044645
Basal Cell Carcinoma Signaling	0.514225737145142	0.271549961740621
Actin Nucleation by ARP-WASP Complex	0.784447700764918	-0.0
Thyroid Cancer Signaling	-0.0	0.776155089344169
Tryptophan Degradation X (Mammalian, via Tryptamine)	0.542549472600523	0.22338571110342798
Mismatch Repair in Eukaryotes	0.542549472600523	0.22338571110342798
Putrescine Degradation III	0.542549472600523	0.22338571110342798
Parkinson's Signaling	0.542549472600523	0.22338571110342798
nNOS Signaling in Skeletal Muscle Cells		0.745696392122656
Regulation of Cellular Mechanics by Calpain Protease	0.302372491040955	0.440596453923265
Assembly of RNA Polymerase I Complex	0.336972968272221	0.396955587627559
Stearate Biosynthesis I (Animals)	0.731995224266741	-0.0
Glutathione Redox Reactions II	0.730978442977229
Coenzyme A Biosynthesis	0.730978442977229
1,25-dihydroxyvitamin D3 Biosynthesis	0.730978442977229
L-serine Degradation	0.730978442977229
Mevalonate Pathway I	0.729377394290376
γ-linolenate Biosynthesis II (Animals)	0.506082036584475	0.20750540354018598
α-Adrenergic Signaling	0.698875171433258	-0.0
The Visual Cycle		0.698859007821977
Eumelanin Biosynthesis		0.691187009792763
Molybdenum Cofactor Biosynthesis		0.691187009792763
Spermine and Spermidine Degradation I		0.691187009792763
NAD Biosynthesis III		0.691187009792763
Ephrin B Signaling	0.682381073754164	-0.0
Lipid Antigen Presentation by CD1	0.677902992548307
Bile Acid Biosynthesis, Neutral Pathway	0.675214950985128
Fatty Acid Activation	0.675214950985128
Pentose Phosphate Pathway	0.304483595315656	0.362441699905102
Oleate Biosynthesis II (Animals)	0.304483595315656	0.362441699905102
PPAR Signaling	0.412488109450959	0.25089190692833996
Methionine Degradation I (to Homocysteine)	-0.0	0.656092760491048
PCP pathway	0.645494319890061	-0.0
Retinoate Biosynthesis I		0.639327124324878
Factors Promoting Cardiogenesis in Vertebrates	0.627495557541461	-0.0
α-tocopherol Degradation	0.620312251262214
Uracil Degradation II (Reductive)	0.620312251262214
Phenylethylamine Degradation I	0.620312251262214
Thymine Degradation	0.620312251262214
Heme Degradation	0.620312251262214
Pentose Phosphate Pathway (Oxidative Branch)	0.620312251262214
Myo-inositol Biosynthesis	0.620312251262214
Lactose Degradation III	0.620312251262214
Superpathway of Cholesterol Biosynthesis	0.26619100544823	0.351739249243617
Granzyme A Signaling		0.616875544006339
dTMP De Novo Biosynthesis		0.606099103493034
CMP-N-acetylneuraminate Biosynthesis I (Eukaryotes)		0.606099103493034
Citrulline-Nitric Oxide Cycle		0.606099103493034
Lysine Degradation II		0.606099103493034
Lysine Degradation V		0.606099103493034
Protein Citrullination		0.606099103493034
NAD Salvage Pathway III		0.606099103493034
D-myo-inositol (1,4,5)-trisphosphate Degradation	-0.0	0.580777797641862
Pyridoxal 5'-phosphate Salvage Pathway	-0.0	0.570629294896362
Cleavage and Polyadenylation of Pre-mRNA	0.25134325198810703	0.305403494450261
CCR5 Signaling in Macrophages	0.548777385400966	-0.0
Cardiomyocyte Differentiation via BMP Receptors	-0.0	0.547441823993716
DNA damage-induced 14-3-3σ Signaling	-0.0	0.547441823993716
Superpathway of Geranylgeranyldiphosphate Biosynthesis I (via Mevalonate)	0.542549472600523
Mechanisms of Viral Exit from Host Cells	0.54243637354819	-0.0
NAD Biosynthesis from 2-amino-3-carboxymuconate Semialdehyde		0.538623814140533
Glycogen Biosynthesis II (from UDP-D-Glucose)		0.538623814140533
Pentose Phosphate Pathway (Non-oxidative Branch)		0.538623814140533
Selenocysteine Biosynthesis II (Archaea and Eukaryotes)		0.538623814140533
Glycerol Degradation I	0.53750630307052
Mitochondrial Dysfunction	0.525094052542284	-0.0
GABA Receptor Signaling	-0.0	0.521022595669485
UVC-Induced MAPK Signaling	0.520031334950383	-0.0
Ubiquinol-10 Biosynthesis (Eukaryotic)	0.22935555445543096	0.281541598510357
Mitochondrial L-carnitine Shuttle Pathway	0.506082036584475
Ethanol Degradation II	0.495668769579428
Melatonin Signaling	-0.0	0.490401604359018
Chondroitin Sulfate Biosynthesis	-0.0	0.489065555324939
NAD Salvage Pathway II	-0.0	0.48789631815037
Aspartate Degradation II		0.483267018989244
Glycoaminoglycan-protein Linkage Region Biosynthesis		0.483267018989244
HIPPO signaling	0.478958978325474	-0.0
Ceramide Degradation	0.472260969408826
Polyamine Regulation in Colon Cancer	-0.0	0.461211885015246
TGF-β Signaling	0.451249432436366	-0.0
Hepatic Cholestasis	0.450748996517958	-0.0
PI3K/AKT Signaling	-0.0	0.450624739656215
RAR Activation	0.4443686629970461	-0.0
Dermatan Sulfate Biosynthesis	-0.0	0.440596453923265
Pregnenolone Biosynthesis	0.41908234495698293
Ketolysis	0.41908234495698293
IL-1 Signaling	0.400273966226526	-0.0
D-myo-inositol (3,4,5,6)-tetrakisphosphate Biosynthesis	0.39848446571691004	-0.0
D-myo-inositol (1,4,5,6)-Tetrakisphosphate Biosynthesis	0.39848446571691004	-0.0
Calcium Transport I		0.396955587627559
Glycogen Degradation II		0.396955587627559
Dopamine Degradation	0.38769516446697694	-0.0
Dermatan Sulfate Biosynthesis (Late Stages)	-0.0	0.38435864077369203
Salvage Pathways of Pyrimidine Deoxyribonucleotides	0.37469129801398104
Sphingosine and Sphingosine-1-phosphate Metabolism	0.37469129801398104
Cyclins and Cell Cycle Regulation	-0.0	0.37334322844965895
Dolichyl-diphosphooligosaccharide Biosynthesis		0.362441699905102
Eicosanoid Signaling	-0.0	0.357968865313688
Chondroitin Sulfate Biosynthesis (Late Stages)	-0.0	0.354051931260143
Role of MAPK Signaling in the Pathogenesis of Influenza	0.351052915664838	-0.0
Cardiac β-adrenergic Signaling	-0.0	0.34900801664537
Serotonin Degradation	0.342514099429083	-0.0
Role of Oct4 in Mammalian Embryonic Stem Cell Pluripotency	-0.0	0.339867267992378
Pathogenesis of Multiple Sclerosis	0.336972968272221
Glycogen Degradation III		0.332177772924077
Cholecystokinin/Gastrin-mediated Signaling	-0.0	0.310549550846884
3-phosphoinositide Degradation	-0.0	0.310103866134804
Assembly of RNA Polymerase III Complex		0.305403494450261
Histidine Degradation VI	0.304483595315656
Gαi Signaling	-0.0	0.302450764643305
Transcriptional Regulatory Network in Embryonic Stem Cells	0.301576112687402
Role of JAK family kinases in IL-6-type Cytokine Signaling	0.301034228874241	-0.0
Glutamate Receptor Signaling	0.2900632852027031	-0.0
Role of IL-17F in Allergic Inflammatory Airway Diseases	0.287220335354299	-0.0
Thyroid Hormone Metabolism II (via Conjugation and/or Degradation)	0.28300853249566
NAD biosynthesis II (from tryptophan)		0.281541598510357
Acyl-CoA Hydrolysis	0.276193657989125
G Beta Gamma Signaling	-0.0	0.266828553121605
Circadian Rhythm Signaling	-0.0	0.2581438730545881
ATM Signaling	0.256031995598364	-0.0
Histamine Degradation	0.25134325198810703
BER pathway	0.25134325198810703
Leukotriene Biosynthesis		0.24085368070292798
CDP-diacylglycerol Biosynthesis I		0.22338571110342798
DNA Double-Strand Break Repair by Homologous Recombination	0.20978244850086103
Phosphatidylglycerol Biosynthesis II (Non-plastidic)		0.19301889552060203
Fatty Acid α-oxidation	0.192268952201561
Telomere Extension by Telomerase	0.192268952201561
Role of Hypercytokinemia/hyperchemokinemia in the Pathogenesis of Influenza	-0.0
Oncostatin M Signaling	-0.0	-0.0
nNOS Signaling in Neurons	-0.0	-0.0
Estrogen Receptor Signaling	-0.0	-0.0
G Protein Signaling Mediated by Tubby	-0.0	-0.0
Gustation Pathway	-0.0	-0.0
Differential Regulation of Cytokine Production in Macrophages and T Helper Cells by IL-17A and IL-17F	-0.0
DNA Methylation and Transcriptional Repression Signaling	-0.0
RAN Signaling	-0.0
Differential Regulation of Cytokine Production in Intestinal Epithelial Cells by IL-17A and IL-17F	-0.0
TCA Cycle II (Eukaryotic)		-0.0
Phototransduction Pathway	-0.0
Noradrenaline and Adrenaline Degradation	-0.0	-0.0
Assembly of RNA Polymerase II Complex	-0.0	-0.0
Role of CHK Proteins in Cell Cycle Checkpoint Control	-0.0	-0.0
Nucleotide Excision Repair Pathway		-0.0
Oxidative Phosphorylation	-0.0	-0.0
Hematopoiesis from Pluripotent Stem Cells	-0.0
Mitotic Roles of Polo-Like Kinase	-0.0	-0.0
Androgen Signaling	-0.0	-0.0
Gαs Signaling	-0.0	-0.0
Cell Cycle Regulation by BTG Family Proteins		-0.0
GADD45 Signaling	-0.0	-0.0
Role of Wnt/GSK-3β Signaling in the Pathogenesis of Influenza	-0.0	-0.0
Role of Cytokines in Mediating Communication between Immune Cells	-0.0

## Sheet: Upstream Reg. Comparison 1.5-fo
© 2000-2015 QIAGEN. All rights reserved.
Upstream regulators	DE_Ptf1a_cKO 2wk-3KO_edgeR 01-08-2015 UP - 2015-01-20 08:52 AM	Downreg genes 012015 - 2015-01-20 09:46 AM
TNF	15.5071615714913
TGFB1	14.5508165849527
IFNG	12.0867711863092
SMARCA4	9.74585827187484
MGEA5	9.68634942848955
estrogen receptor	9.34500610796085
SYVN1	5.27920180519921	3.68386655518473
TGM2	8.76563463769364
MAPK1	8.51862881430901
CTNNB1	8.20974237765534
CEBPA	7.52990661984476
ESR1	3.8207232521291	3.69412720180105
FSH	5.89456355823433	1.55559812563088
ERBB2	6.92921059690976
TRIB3		6.55879639100092
FOXA1	6.48913363492095
Mek	3.66135345517842	2.73152211788471
BRD4		6.33703119854686
TCF	6.33383752348708
AR	6.3294407555009
IL27	6.25815470388361
IL13	6.25588828319818
SOX11	6.0950029226032
WISP2	6.06217776403807
RELA	6.00464628142696
NFkB (complex)	5.83372272990372
TP53	5.69520285592024
DICER1	5.62088270330302
P38 MAPK	5.38875132894155
ATG5	5.30510455798623
IL1B	5.28019097540689
TCF4	5.1649377842788
ERK1/2	5.14439682618876
IDH2	5.04478347811344
MAP2K1/2	3.59833887304397	1.40115777809773
LGALS3	3.23163655310047	1.74988859530537
TCR	4.92702125691952
SPI1	4.9247569497185
NEUROG1	4.91129661212968
ZNF148	4.84775794052344
NUPR1	4.76320003791484
PGR	2.91355923808619	1.84069455284691
IDH1	4.72564459306751
IL10	4.58592575893836
SREBF1	2.63578817088332	1.90085141990725
KIAA1524	3.08308362296876	1.45059306928702
PDGF BB	3.1660461031431	1.32571042290337
PRKCD	4.48107711877062
TP63	4.4674290539569
IRF2	4.435907308473
IFNA2	4.40965647413965
MITF	4.40216332221088
GH1	4.20225305364751
CNOT7	4.1467820799408
IFNB1	4.02756480731057
PDLIM2	4.02737091209844
Hdac	3.99514495032582
MAP3K7	3.91345010307743
EIF2AK2	3.90907364790034
STAT1	3.90667277419563
NR3C1	3.8984848650018
GLI1	1.90649954019047	1.96856139486558
IRF1	3.84178543556458
RUNX3	2.39543604454389	1.43900553298789
FANCC	2.5092362108675	1.32451416025019
PPARG	3.82081458725411
NEDD9	3.80408215205888
TWIST2	3.78373627082561
DEF6	3.7724734629518
PRDM1	3.7724734629518
CHI3L1	3.75375809841562
EBI3	3.75375809841562
Lh	3.7162690432854
SF1	3.71527278577762
ETV5	3.69914121409213
IL6	3.66145577516613
MXI1		3.62321522704793
TAB1	3.61098768586807
USF1	3.59833887304397
BCL6	3.57776298798828
HNRNPA2B1	3.57021448332884
SATB1	3.43859064569494
MYC	2.0196583726967	1.4014066186914
ERN1	3.40812962073071
PAF1	3.40285625991919
ATG7	3.36902777857853
PDGFRA	3.36902777857853
ATF4		3.35482733489546
IgG	3.32169356873751
SOX9	3.32024077949552
FGF2	3.25570005603573
Growth hormone	3.24607347626843
IGF1	3.14827712238905
SPDEF	3.14827712238905
CCL5	3.14804974306176
FBN1	3.13187771754494
ELF3	3.08968134134053
IL1RN	3.08937747617092
MS4A1	1.47735093254318	1.59974475364229
miR-219a-5p (and other miRNAs w/seed GAUUGUC)	3.0537149498461
SMC3	3.0537149498461
CYP2E1	3.0537149498461
TEAD	3.0537149498461
miR-29b-3p (and other miRNAs w/seed AGCACCA)	3.01183405019176
CDH1	3.01183405019176
CDKN1A	2.95944159345225
ELK1		2.95875244532408
EPAS1	2.950182607995
RAB1B		2.92257608038047
PDX1	2.89181612534029
Pkc(s)	2.89181612534029
TLR3	2.84853433387089
ERK	2.84853433387089
ESR2		2.83907217361668
FGF7	2.80876816636566
SMARCD3	2.80876816636566
T	2.80876816636566
TREM1	2.78219831460474
HSF1	2.75578312703227
HIF1A	2.75017644175777
A2M		2.70453703669111
mir-205	2.67615407219793
ALB	2.67615407219793
AMER1	2.67615407219793
MYOC	2.66951570239993
NLRC5	2.65578041511861
CLCA2	2.65578041511861
PRKAR1A	2.65578041511861
TNFSF11	2.65578041511861
CXCL12	2.63578817088332
PRKCA	2.63578817088332
SP1	2.59475237892603
Hedgehog		2.58189516900423
TP73	2.5572591347443
EIF4F		2.55325418853377
miR-183-5p (miRNAs w/seed AUGGCAC)		2.55325418853377
FTH1		2.55325418853377
RPRD1B		2.55325418853377
PXN		2.55325418853377
IFNL1	2.47440991914469
Akt	2.44260200688196
RFXANK	2.42322701410014
CALR	2.42322701410014
CCR2	2.42322701410014
FOXP1	2.42322701410014
ULK1	2.42322701410014
GRHL2	2.42322701410014
DAB2IP	2.42322701410014
TAC4	2.42322701410014
BECN1	2.42322701410014
VIPAS39	2.39543604454389
F10	2.39543604454389
LOXL2	2.39543604454389
DNAJB6	2.39543604454389
Gm-csf	2.39284768301984
PTGS2	2.39007066757158
NME1		2.36619297180287
FBXW7		2.35624928302914
NRIP1		2.35624928302914
RFX5	2.32641554381176
LGALS1	2.32641554381176
PPARA	2.3191646030527
TNFSF10	2.31008793437132
NFKB1	2.26753906473425
RUNX1	2.2055592656358
ZNF652	2.17264209824764
RFXAP	2.17264209824764
MIA	2.17264209824764
SMAD1	2.17264209824764
ELANE	2.17264209824764
mir-19	2.17264209824764
FOXO1	2.17158668238683
MEMO1		2.16947165557123
HNF1A	2.16893291212032
CD24	2.12350239243899
PI3K (family)	2.12060290044054
CSF1	2.11144542023583
ATAD2		2.09170169661916
ACTL6A		2.09170169661916
CHRNA7		2.09170169661916
ABCB7		2.09170169661916
ZMIZ2		2.09170169661916
EHF	2.08018498710272
VDR	2.06340407152428
GAPDH	2.05341559802636
CCNK	2.05341559802636
SOCS1	2.05341559802636
EGF	2.02493571979259
MDM2	2.02160814301114
MYB	2.02160814301114
GDF2		2.01067250112904
ZAP70	1.98869765017299
ZBTB7A	1.98869765017299
IRF8	1.98869765017299
TGFBR2	1.97597219825547
FOXO3	1.97261696632987
GFI1		1.97200680215423
MAPK7	1.96424541238248
CYBB	1.96424541238248
Ifn	1.96424541238248
FGF21	1.96424541238248
ROCK1	1.96424541238248
HTR7	1.96424541238248
ENTPD5	1.96424541238248
RNA polymerase II	1.96221814560935
SIN3A	1.93724786396813
IL5		1.90085141990725
EIF4E		1.87301195242352
GLI2		1.87301195242352
MAPK9	1.87269301823015
STAT3	1.86950678457109
SP3	1.86653546521407
PRKCE	1.85784341112174
IFN Beta	1.85056643806731
ELF4	1.84637617037757
SPP1	1.84637617037757
HDAC1	1.84244955121659
MNT	1.8327126565485
miR-200b-3p (and other miRNAs w/seed AAUACUG)	1.8327126565485
ITGB2	1.8327126565485
S100A4	1.8327126565485
miR-218-5p (and other miRNAs w/seed UGUGCUU)	1.8327126565485
PPP2CA	1.8327126565485
KRAS	1.82344496818185
HNRNPA1		1.80616872416271
SNRK		1.80616872416271
RBCK1		1.80616872416271
IL4	1.8049919479145
DNMT3B		1.75561271895459
LNX2		1.75189953009826
JAK1	1.7510959318902
CTGF	1.7510959318902
SLC29A1	1.7510959318902
COL18A1	1.71890085961092
SRC		1.71790690901654
IGF1R	1.71215838157955
YAP1	1.71215838157955
Rxr	1.69784699262574
BCL6B	1.69784699262574
CHRNA3	1.69784699262574
SREBF2	1.69784699262574
IL21	1.68993022467292
IFT57	1.68125698701642
HTATIP2	1.68125698701642
CRTC1	1.68125698701642
mir-7	1.68125698701642
PDGFRB	1.68125698701642
APC	1.68125698701642
KLF11	1.68125698701642
LCK	1.68125698701642
APLN	1.68125698701642
GLIPR2	1.68125698701642
FZD8	1.68125698701642
HAS2	1.68125698701642
mir-148	1.68125698701642
miR-192-5p (and other miRNAs w/seed UGACCUA)	1.68125698701642
Calcineurin protein(s)	1.68125698701642
XAF1	1.68125698701642
CDX2	1.67297865910228
ELAVL1	1.64747270256809
TWIST1	1.64514226721821
PCDH11Y		1.64426377576818
RNF31		1.64426377576818
PIN1		1.64409949247738
CD40	1.62795146714383
Creb	1.62472736197334
PKM		1.59974475364229
MKNK1		1.59974475364229
IGF2BP1		1.59974475364229
SIRT1	1.58159341741648
SIN3B	1.5815782663407
CCL2	1.5815782663407
SMAD7	1.57950992248776
IFN1@	1.57950992248776
PLAUR	1.57950992248776
NOX4	1.57950992248776
C3	1.57950992248776
NFIX	1.57950992248776
PIK3R1	1.57950992248776
CSF2	1.57921029601351
CLDN7	1.57921029601351
SMAD3	1.53498496120209
EGR1	1.52124393745926
PTGES	1.52124393745926
NFYA	1.50573095673119
SRF	1.48279973369304
AKT3	1.47735093254318
PLAA	1.47735093254318
HISTONE	1.47735093254318
SFRP4	1.47735093254318
DAXX	1.47735093254318
miR-141-3p (and other miRNAs w/seed AACACUG)	1.47735093254318
miR-130a-3p (and other miRNAs w/seed AGUGCAA)	1.47735093254318
Ctnna	1.47735093254318
MAD2L2	1.47735093254318
miR-126a-5p (and other miRNAs w/seed AUUAUUA)	1.47735093254318
mir-221	1.47735093254318
KCNN4	1.47735093254318
LIPE	1.47735093254318
caspase	1.47735093254318
PSMD4	1.47735093254318
HSP90AA1	1.47735093254318
FES	1.47735093254318
ZBTB7B	1.47735093254318
ITGAL	1.47735093254318
mir-130	1.47735093254318
HGF	1.47677718643718
JUN	1.47677718643718
Cg	1.47677718643718
HSPA5	1.47446544904757
miR-21-5p (and other miRNAs w/seed AGCUUAU)	1.47446544904757
IL12 (family)	1.47446544904757
miR-145-5p (and other miRNAs w/seed UCCAGUU)	1.46385545042739
CARM1		1.45954169624783
AZGP1		1.45954169624783
CXCR4		1.45954169624783
SBDS	1.4520227187546
CDKN1B		1.43900553298789
CSF1R		1.43900553298789
PRKCZ		1.43900553298789
CETP		1.43900553298789
DDX17		1.43900553298789
ATF6		1.43900553298789
PLSCR1		1.43900553298789
NDUFA13		1.43900553298789
ITGA5		1.43900553298789
SMO		1.43900553298789
BMP10		1.43900553298789
IL33	1.43496796357333
FOXA2	1.43496796357333
SUPT16H	1.43496796357333
IL12 (complex)	1.42157197832927
IL15	1.42157197832927
NRXN1	1.40921489621445
Igm	1.40921489621445
let-7	1.40921489621445
E2F1	1.40539704949862
SND1		1.39134499156436
Gsk3		1.39134499156436
TGFB2	1.38034430062016
IFNAR2	1.38034430062016
miR-124-3p (and other miRNAs w/seed AAGGCAC)		1.37961301342836
mir-21		1.37961301342836
HMGB1	1.36876928572955
HDAC6	1.36876928572955
RARA	1.36876928572955
BMP7	1.36876928572955
YY1	1.36876928572955
STAT5a/b	1.35713105429667
MAP2K1	1.35713105429667
UXT	1.35713105429667
RBL2		1.33671911515028
TARBP2	1.31910271646009
PML	1.31910271646009
NR3C2	1.31910271646009
ETS	1.31910271646009
MCAM	1.31910271646009
PLCD1	1.31910271646009
ADM	1.31910271646009
AGT	1.31910271646009
TSC22D3	1.31910271646009
PBX1	1.31910271646009
PURA	1.31910271646009
L1CAM	1.31910271646009
mir-126	1.31910271646009
RXRG	1.31910271646009
PRKRA	1.31910271646009
SERPINB2	1.31910271646009
FGFR2	1.31910271646009
UGCG	1.31910271646009
Jnk	1.31416245806149
KDM5B	1.31370839113543
Alpha catenin		1.3081563071792
CDK8		1.3081563071792
STAT5B		1.3081563071792
IL6R		1.3081563071792
PLD2		1.3081563071792
HLX	1.30669010616963
