# Supplementary material for: The acinar differentiation determinant PTF1A inhibits initiation of pancreatic ductal adenocarcinoma
Source: eLife journal article supplement (doi:10.7554/elife.07125), 2015-07-07
Supplement: supp [file elife-07125-supp-v1.zip › elife_poa_e07125_Supplementary_File_4.xls]

## Sheet: Canonical Pathways UP 2-fold
© 2000-2015 QIAGEN. All rights reserved.
Ingenuity Canonical Pathways	-log(p-value)	Ratio	z-score	Molecules
Antigen Presentation Pathway	1.04E01	3.78E-01		HLA-E,CD74,HLA-DQA1,NLRC5,B2M,TAP1,TAPBP,HLA-DRA,HLA-A,TAP2,HLA-DRB5,MR1,CIITA,PSMB8
Dendritic Cell Maturation	1.02E01	1.66E-01		PIK3C2A,HLA-DQA1,PLCE1,COL1A1,FCER1G,LEPR,PIK3R1,IRF8,PIK3CD,STAT1,TYROBP,HLA-DRB5,PIK3C3,PIK3C2G,IL33,PIK3R3,HLA-DQB1,TNFRSF1B,COL3A1,COL1A2,B2M,HLA-DRA,PLCG2,HLA-A,FCGR2B,TLR3,PLCH2,COL11A2
iCOS-iCOSL Signaling in T Helper Cells	9.5E00	2.04E-01	3.464	ITPR2,PIK3R3,PIK3C2A,HLA-DQA1,HLA-DQB1,PLEKHA2,CHP1,ICOSLG/LOC102723996,IL2RB,FCER1G,PIK3R1,VAV1,IL2RG,HLA-DRA,LCP2,PIK3CD,HLA-DRB5,ITPR1,PTPRC,PIK3C2G,PIK3C3
Complement System	9.42E00	3.61E-01	0.905	ITGAM,CFB,C3,CFI,C1QB,CFH,C3AR1,C1QA,C1QC,C4A/C4B,C2,CD55,CFD
Hepatic Fibrosis / Hepatic Stellate Cell Activation	8.02E00	1.38E-01		IGFBP4,MMP2,COL6A1,COL27A1,COL1A1,ACTA2,LEPR,VCAM1,FN1,STAT1,EDN1,COL6A6,CCL5,PDGFRA,TNFRSF1B,CD14,COL3A1,COL1A2,MYL9,COL6A2,COL5A1,IGF1R,AGT,COL16A1,COL5A2,IL4R,COL11A2
Production of Nitric Oxide and Reactive Oxygen Species in Macrophages	7.59E00	1.4E-01	3.800	JUN,IRF1,PIK3C2A,NCF1,JAK3,PIK3R1,IRF8,PIK3CD,STAT1,CAT,SIRPA,PIK3C3,PIK3C2G,ALB,PIK3R3,TNFRSF1B,APOD,MAP3K12,PLCG2,LYZ,CLU,ARG2,PPP1R3A,CYBB,CYBA
Leukocyte Extravasation Signaling	7.54E00	1.35E-01	4.472	ITGAM,ITGAL,PIK3C2A,MMP2,NCF1,CLDN4,WIPF1,ACTA2,PIK3R1,THY1,RAC2,VCAM1,CXCR4,PIK3CD,PIK3C3,PIK3C2G,PIK3R3,CD44,VAV1,PLCG2,SELPLG,ARHGAP4,ITGA4,CYBB,CYBA,MMP14
UVA-Induced MAPK Signaling	6.73E00	1.84E-01	3.317	PARP12,JUN,PIK3R3,PIK3C2A,PLCE1,PIK3R1,PLCG2,PARP10,PIK3CD,ZC3HAV1,STAT1,PARP3,PLCH2,RPS6KA1,PIK3C2G,PIK3C3
Virus Entry via Endocytic Pathways	6.59E00	1.8E-01		ITGAL,PIK3R3,PIK3C2A,B2M,ACTA2,PIK3R1,RAC2,ITGB7,PLCG2,HLA-A,PIK3CD,ITGB6,CD55,ITGA4,PIK3C2G,PIK3C3
CD28 Signaling in T Helper Cells	6.5E00	1.59E-01	3.606	JUN,ITPR2,PIK3R3,PIK3C2A,HLA-DQA1,HLA-DQB1,CHP1,FCER1G,PIK3R1,VAV1,HLA-DRA,LCP2,PIK3CD,HLA-DRB5,ITPR1,PTPRC,PIK3C2G,PIK3C3
PKCθ Signaling in T Lymphocytes	6.5E00	1.59E-01	2.000	JUN,PIK3R3,PIK3C2A,HLA-DQA1,HLA-DQB1,CHP1,MAP3K12,FCER1G,PIK3R1,RAC2,VAV1,HLA-DRA,PLCG2,LCP2,PIK3CD,HLA-DRB5,PIK3C2G,PIK3C3
Role of JAK1 and JAK3 in γc Cytokine Signaling	6.44E00	2.17E-01		PIK3R3,PIK3C2A,JAK3,IL2RB,PIK3R1,IL2RG,PIK3CD,STAT1,IL4R,BLNK,FES,PIK3C2G,PIK3C3
LXR/RXR Activation	6.05E00	1.49E-01	0.243	TF,C3,SERPINF1,CD14,TNFRSF1B,APOD,AGT,LYZ,C4A/C4B,TLR3,SCD,CLU,ARG2,AMBP,PLTP,IL33,TTR,ALB
PI3K Signaling in B Lymphocytes	5.94E00	1.46E-01		JUN,ITPR2,C3,PLEKHA2,CHP1,PLCE1,PIK3R1,VAV1,ATF3,PLCG2,FCGR2B,PIK3CD,PLCH2,IL4R,ITPR1,PTPRC,BLNK,CD81
Macropinocytosis Signaling	5.78E00	1.91E-01	3.000	PIK3R3,PIK3C2A,CD14,RAB34,PIK3R1,CSF1R,ITGB7,PLCG2,MRC1,PIK3CD,ITGB6,PIK3C2G,PIK3C3
Role of Pattern Recognition Receptors in Recognition of Bacteria and Viruses	5.5E00	1.43E-01	3.873	PIK3R3,C3,PIK3C2A,CCL5,C1QB,OAS2,DDX58,PIK3R1,C3AR1,C1QA,PLCG2,C1QC,PIK3CD,TLR3,IFIH1,PIK3C2G,PIK3C3
IL-4 Signaling	5.42E00	1.78E-01		PIK3R3,PIK3C2A,HLA-DQA1,HLA-DQB1,JAK3,PIK3R1,IL2RG,HLA-DRA,PIK3CD,HLA-DRB5,IL4R,PIK3C2G,PIK3C3
IL-9 Signaling	5.4E00	2.65E-01	3.000	PIK3R3,PIK3CD,PIK3C2A,STAT1,JAK3,PIK3R1,IL2RG,PIK3C3,PIK3C2G
Role of NFAT in Regulation of the Immune Response	5.19E00	1.2E-01	3.606	JUN,ITPR2,PIK3R3,PIK3C2A,HLA-DQA1,HLA-DQB1,CHP1,FCER1G,PIK3R1,HLA-DRA,PLCG2,LCP2,FCGR2B,PIK3CD,GNB5,HLA-DRB5,ITPR1,BLNK,PIK3C2G,PIK3C3
Integrin Signaling	5.17E00	1.13E-01	4.243	ITGAM,ITGAL,PIK3R3,PIK3C2A,NEDD9,TSPAN7,MYL9,WIPF1,ACTA2,PIK3R1,RAC2,ITGB7,PLCG2,GRB7,TSPAN3,PIK3CD,TSPAN1,ITGB6,CAPN6,ITGA4,PIK3C2G,PIK3C3
Acute Phase Response Signaling	5.11E00	1.19E-01	1.291	JUN,CFB,PIK3R3,TF,C3,SERPINF1,CP,TNFRSF1B,SERPINA3,PIK3R1,AGT,C4A/C4B,FN1,PIK3CD,C2,AMBP,ITIH2,IL33,TTR,ALB
Atherosclerosis Signaling	4.82E00	1.33E-01		CCR2,ALOX12,APOD,COL3A1,PLA2G1B,COL1A2,COL1A1,VCAM1,LYZ,CXCR4,CLU,SELPLG,ITGA4,COL11A2,IL33,ALB
FcγRIIB Signaling in B Lymphocytes	4.68E00	2.2E-01	2.828	PIK3R3,PIK3CD,FCGR2B,PIK3C2A,BLNK,PIK3R1,PIK3C3,PIK3C2G,PLCG2
IL-2 Signaling	4.53E00	1.89E-01	3.000	JUN,PIK3R3,PIK3CD,PIK3C2A,JAK3,IL2RB,PIK3R1,IL2RG,PIK3C3,PIK3C2G
EGF Signaling	4.31E00	1.79E-01	3.162	JUN,ITPR2,PIK3R3,PIK3CD,PIK3C2A,STAT1,ITPR1,PIK3R1,PIK3C3,PIK3C2G
MSP-RON Signaling Pathway	4.26E00	1.96E-01		ITGAM,CCR2,PIK3R3,PIK3CD,PIK3C2A,ACTA2,PIK3R1,PIK3C3,PIK3C2G
NRF2-mediated Oxidative Stress Response	4.25E00	1.07E-01	2.828	JUN,PIK3R3,PIK3C2A,ABCC2,GSTM3,FMO1,ACTA2,PIK3R1,MGST1,PRDX1,ENC1,SOD3,PIK3CD,CAT,EPHX1,VCP,GPX2,PIK3C2G,PIK3C3
Fcγ Receptor-mediated Phagocytosis in Macrophages and Monocytes	4.25E00	1.4E-01	3.606	PIK3R3,NCF1,FYB,PLD4,ACTA2,PIK3R1,PLD1,RAC2,VAV1,LCP2,MYO5A,NAPEPLD,PIK3C2G
Growth Hormone Signaling	4.21E00	1.59E-01	3.162	IGF1R,PIK3R3,PIK3CD,PIK3C2A,STAT1,GHR,RPS6KA1,PIK3R1,PIK3C3,PIK3C2G,PLCG2
Renin-Angiotensin Signaling	4.16E00	1.3E-01	3.207	JUN,ITPR2,PIK3R3,PIK3C2A,CCL5,ADCY7,PIK3R1,PLCG2,AGT,PIK3CD,STAT1,ITPR1,PIK3C2G,PIK3C3
Granulocyte Adhesion and Diapedesis	4.15E00	1.09E-01		ITGAM,ITGAL,MMP2,CCL5,TNFRSF1B,SDC2,CLDN4,THY1,VCAM1,CXCR4,CXCL13,SELPLG,CXCL16,ITGA4,CXCL14,SDC3,IL33,MMP14
Endothelin-1 Signaling	4.08E00	1.08E-01	3.771	JUN,ITPR2,PIK3R3,PIK3C2A,ADCY7,PLA2G1B,PLCE1,PLD4,PIK3R1,PLD1,PLCG2,PIK3CD,NAPEPLD,PLCH2,EDN1,ITPR1,PIK3C2G,PIK3C3
Docosahexaenoic Acid (DHA) Signaling	4E00	2.05E-01		PIK3R3,PIK3CD,PIK3C2A,APAF1,SERPINF1,PIK3R1,PIK3C3,PIK3C2G
Leptin Signaling in Obesity	3.98E00	1.51E-01		PIK3R3,PIK3CD,PIK3C2A,ADCY7,PLCH2,PLCE1,LEPR,PIK3R1,PIK3C3,PIK3C2G,PLCG2
IL-12 Signaling and Production in Macrophages	3.79E00	1.15E-01		IRF1,JUN,ALOX12,PIK3R3,PIK3C2A,APOD,PIK3R1,LYZ,IRF8,PIK3CD,STAT1,CLU,PIK3C2G,PIK3C3,ALB
PDGF Signaling	3.77E00	1.43E-01	3.317	JUN,PIK3R3,PIK3CD,PIK3C2A,PDGFRA,STAT1,JAK3,PIK3R1,PIK3C3,PIK3C2G,PLCG2
OX40 Signaling Pathway	3.7E00	1.67E-01		JUN,HLA-E,HLA-A,HLA-DQA1,HLA-DQB1,HLA-DRB5,B2M,FCER1G,HLA-DRA
IL-15 Signaling	3.69E00	1.52E-01		PIK3R3,PIK3CD,PIK3C2A,JAK3,IL2RB,PIK3R1,VCAM1,IL2RG,PIK3C3,PIK3C2G
Reelin Signaling in Neurons	3.67E00	1.39E-01		ARHGEF3,ITGAL,PIK3R3,PIK3CD,PIK3C2A,ITGA4,PIK3R1,PAFAH1B3,ARHGEF4,PIK3C3,PIK3C2G
T Helper Cell Differentiation	3.63E00	1.49E-01		HLA-DQA1,HLA-DQB1,STAT1,TNFRSF1B,HLA-DRB5,ICOSLG/LOC102723996,IL4R,FCER1G,IL2RG,HLA-DRA
Thrombopoietin Signaling	3.63E00	1.64E-01	3.000	JUN,PIK3R3,PIK3CD,PIK3C2A,STAT1,PIK3R1,PIK3C3,PIK3C2G,PLCG2
Graft-versus-Host Disease Signaling	3.61E00	1.82E-01		HLA-E,HLA-A,HLA-DQA1,HLA-DQB1,HLA-DRB5,FCER1G,IL33,HLA-DRA
GDNF Family Ligand-Receptor Interactions	3.58E00	1.47E-01	2.828	JUN,ITPR2,PIK3R3,PIK3CD,PIK3C2A,ITPR1,PIK3R1,PIK3C3,PIK3C2G,PLCG2
Axonal Guidance Signaling	3.57E00	7.51E-02		SEMA4G,PIK3C2A,MMP2,CHP1,GLI1,MICAL1,PLCE1,WIPF1,PIK3R1,RAC2,ADAMTS2,PLXNB1,CXCR4,PIK3CD,FZD1,ERBB2,FES,STK36,PIK3C3,PIK3C2G,PIK3R3,EPHB3,SDC2,SEMA3B,ADAM19,MYL9,PLCG2,GNB5,PLCH2,ITGA4,PFN2,L1CAM
ErbB2-ErbB3 Signaling	3.57E00	1.61E-01	2.828	JUN,PIK3R3,PIK3CD,PIK3C2A,ERBB2,JAK3,PIK3R1,PIK3C3,PIK3C2G
Signaling by Rho Family GTPases	3.55E00	9.01E-02	4.025	JUN,ARHGEF3,PIK3R3,PIK3C2A,MAP3K12,MYL9,WIPF1,ACTA2,PIK3R1,PLD1,VIM,ARHGEF19,PIK3CD,GNB5,KIAA1804,ITGA4,ARHGEF4,CDH11,CYBB,PIK3C2G,PIK3C3
Caveolar-mediated Endocytosis Signaling	3.37E00	1.39E-01		ITGAM,ITGAL,HLA-A,ITGB6,CD55,ITGA4,B2M,ACTA2,ALB,ITGB7
Paxillin Signaling	3.37E00	1.21E-01	2.828	ITGAM,ITGAL,PIK3R3,PIK3CD,PIK3C2A,ITGB6,ITGA4,ACTA2,PIK3R1,PIK3C3,PIK3C2G,ITGB7
Allograft Rejection Signaling	3.34E00	1.67E-01		HLA-E,HLA-A,HLA-DQA1,HLA-DQB1,HLA-DRB5,B2M,FCER1G,HLA-DRA
Prolactin Signaling	3.32E00	1.37E-01	3.162	JUN,IRF1,PIK3R3,PIK3CD,PIK3C2A,STAT1,PIK3R1,PIK3C3,PIK3C2G,PLCG2
Gαq Signaling	3.31E00	1.03E-01	3.207	ITPR2,PIK3R3,PIK3C2A,CHP1,PLD4,PIK3R1,PLD1,PLCG2,PIK3CD,NAPEPLD,GNB5,RGS2,ITPR1,PIK3C2G,PIK3C3
CNTF Signaling	3.28E00	1.63E-01	2.828	PIK3R3,PIK3CD,PIK3C2A,STAT1,RPS6KA1,PIK3R1,PIK3C3,PIK3C2G
Intrinsic Prothrombin Activation Pathway	3.23E00	2.14E-01		PROS1,COL3A1,COL1A2,COL1A1,F13A1,COL11A2
Nicotine Degradation II	3.22E00	1.6E-01		POR,FMO5,CYP3A7,UGT2B7,UGT2B10,FMO1,CYP2S1,CYP1B1
Rac Signaling	3.21E00	1.17E-01	3.464	JUN,PIK3R3,PIK3CD,PIK3C2A,TIAM1,ITGA4,PIK3R1,PLD1,CYBB,CD44,PIK3C3,PIK3C2G
Crosstalk between Dendritic Cells and Natural Killer Cells	3.21E00	1.24E-01		ITGAL,HLA-E,HLA-A,TLR3,TNFRSF1B,TYROBP,HLA-DRB5,IL2RB,ACTA2,IL2RG,HLA-DRA
p70S6K Signaling	3.2E00	1.1E-01	3.606	PIK3R3,PIK3C2A,PLCE1,PIK3R1,PLD1,IL2RG,PLCG2,AGT,PIK3CD,PLCH2,IL4R,PIK3C2G,PIK3C3
Acute Myeloid Leukemia Signaling	3.18E00	1.32E-01	1.897	PIK3R3,PIK3CD,PIK3C2A,CSF2RA,FLT3LG,TCF7L2,PIK3R1,PIK3C3,PIK3C2G,CSF1R
HER-2 Signaling in Breast Cancer	3.18E00	1.32E-01		PIK3R3,PIK3CD,PIK3C2A,MMP2,ITGB6,ERBB2,PIK3R1,PIK3C3,PIK3C2G,ITGB7
Phospholipase C Signaling	3.18E00	8.66E-02	3.464	ITPR2,ARHGEF3,ADCY7,CHP1,PLA2G1B,PLCE1,MYL9,PLD4,FCER1G,PLD1,PLCG2,LCP2,FCGR2B,ARHGEF19,NAPEPLD,GNB5,ITPR1,ITGA4,BLNK,ARHGEF4
HGF Signaling	3.18E00	1.15E-01	3.162	JUN,PIK3R3,PIK3CD,PIK3C2A,ELF4,MAP3K12,ITGA4,PIK3R1,ELF3,PIK3C3,PIK3C2G,PLCG2
Role of p14/p19ARF in Tumor Suppression	3.14E00	2.07E-01	-2.449	PIK3R3,PIK3CD,PIK3C2A,PIK3R1,PIK3C3,PIK3C2G
IL-8 Signaling	3.13E00	9.29E-02	4.000	JUN,ITGAM,PIK3R3,PIK3C2A,MMP2,PLD4,MYL9,PIK3R1,PLD1,RAC2,VCAM1,PIK3CD,NAPEPLD,GNB5,CYBB,PIK3C2G,PIK3C3
Pancreatic Adenocarcinoma Signaling	3.1E00	1.13E-01	3.464	PIK3R3,PIK3CD,NAPEPLD,PIK3C2A,STAT1,ERBB2,JAK3,PLD4,PIK3R1,PLD1,PIK3C3,PIK3C2G
Non-Small Cell Lung Cancer Signaling	3.08E00	1.38E-01	3.000	ITPR2,PIK3R3,PIK3CD,PIK3C2A,ERBB2,ITPR1,PIK3R1,PIK3C3,PIK3C2G
fMLP Signaling in Neutrophils	3.07E00	1.12E-01	3.317	ITPR2,PIK3R3,PIK3CD,PIK3C2A,GNB5,NCF1,CHP1,ITPR1,PIK3R1,CYBB,PIK3C3,PIK3C2G
Natural Killer Cell Signaling	3.03E00	1.11E-01		LCP2,PIK3R3,PIK3CD,PIK3C2A,TYROBP,FCER1G,PIK3R1,RAC2,VAV1,PIK3C3,PIK3C2G,PLCG2
Sphingosine-1-phosphate Signaling	3.03E00	1.11E-01	2.714	PIK3R3,PIK3CD,PIK3C2A,PDGFRA,ADCY7,NAAA,PLCH2,PLCE1,PIK3R1,PIK3C3,PIK3C2G,PLCG2
Fc Epsilon RI Signaling	2.99E00	1.1E-01	3.464	LCP2,PIK3R3,PIK3CD,PIK3C2A,PLA2G1B,FCER1G,PIK3R1,RAC2,VAV1,PIK3C3,PIK3C2G,PLCG2
Lymphotoxin β Receptor Signaling	2.99E00	1.48E-01	2.828	PIK3R3,PIK3CD,PIK3C2A,APAF1,PIK3R1,VCAM1,PIK3C3,PIK3C2G
Role of IL-17A in Arthritis	2.99E00	1.48E-01		PIK3R3,PIK3CD,PIK3C2A,CCL5,RPS6KA1,PIK3R1,PIK3C3,PIK3C2G
Autoimmune Thyroid Disease Signaling	2.99E00	1.67E-01		HLA-E,HLA-A,HLA-DQA1,HLA-DQB1,HLA-DRB5,FCER1G,HLA-DRA
Tec Kinase Signaling	2.98E00	9.62E-02	3.742	PIK3R3,PIK3C2A,TNFRSF21,JAK3,ACTA2,FCER1G,PIK3R1,VAV1,PLCG2,PIK3CD,GNB5,STAT1,ITGA4,PIK3C2G,PIK3C3
FXR/RXR Activation	2.96E00	1.04E-01		TF,C3,ABCC2,SERPINF1,APOD,AGT,C4A/C4B,CLU,AMBP,PLTP,IL33,TTR,ALB
Chondroitin Sulfate Degradation (Metazoa)	2.93E00	3.08E-01		HEXB,GALNS,GM2A,CD44
Agranulocyte Adhesion and Diapedesis	2.9E00	9.14E-02		MMP2,CCL5,CLDN4,MYL9,ACTA2,VCAM1,ITGB7,CXCR4,FN1,CXCL13,SELPLG,CXCL16,ITGA4,CXCL14,IL33,MMP14
Amyotrophic Lateral Sclerosis Signaling	2.9E00	1.13E-01		GLUL,PIK3R3,PIK3CD,PIK3C2A,APAF1,CAPN6,CAT,SLC1A2,PIK3R1,PIK3C3,PIK3C2G
Role of NFAT in Cardiac Hypertrophy	2.88E00	9.09E-02	3.873	ITPR2,PIK3R3,PIK3C2A,ADCY7,CHP1,SLC8A1,PLCE1,PIK3R1,PLCG2,IGF1R,PIK3CD,GNB5,PLCH2,ITPR1,PIK3C2G,PIK3C3
p53 Signaling	2.86E00	1.12E-01	-0.905	JUN,PIK3R3,PIK3CD,PIK3C2A,APAF1,TP53INP1,THBS1,PIK3R1,HIPK2,PIK3C3,PIK3C2G
Cdc42 Signaling	2.84E00	1.01E-01	1.633	JUN,HLA-E,HLA-DQA1,HLA-DQB1,B2M,MYL9,WIPF1,FCER1G,VAV1,HLA-DRA,HLA-A,HLA-DRB5,ITGA4
Glioma Invasiveness Signaling	2.83E00	1.4E-01	2.828	PIK3R3,PIK3CD,PIK3C2A,MMP2,PIK3R1,CD44,PIK3C3,PIK3C2G
Glioblastoma Multiforme Signaling	2.83E00	9.66E-02	3.742	ITPR2,PIK3R3,PIK3C2A,PDGFRA,PLCE1,PIK3R1,PLCG2,IGF1R,PIK3CD,FZD1,PLCH2,ITPR1,PIK3C2G,PIK3C3
Neuropathic Pain Signaling In Dorsal Horn Neurons	2.82E00	1.11E-01	3.317	ITPR2,PIK3R3,PIK3CD,PIK3C2A,PLCH2,PLCE1,ITPR1,PIK3R1,PIK3C3,PIK3C2G,PLCG2
IL-3 Signaling	2.8E00	1.27E-01		JUN,PIK3R3,PIK3CD,PIK3C2A,STAT1,CHP1,PIK3R1,PIK3C3,PIK3C2G
FLT3 Signaling in Hematopoietic Progenitor Cells	2.8E00	1.27E-01		PIK3R3,PIK3CD,PIK3C2A,STAT1,FLT3LG,RPS6KA1,PIK3R1,PIK3C3,PIK3C2G
HIF1α Signaling	2.79E00	1.1E-01		JUN,PIK3R3,PIK3CD,PIK3C2A,MMP2,EDN1,PIK3R1,PIK3C3,PIK3C2G,SLC2A5,MMP14
Calcium-induced T Lymphocyte Apoptosis	2.78E00	1.38E-01	2.646	ITPR2,HLA-DQA1,HLA-DQB1,HLA-DRB5,CHP1,ITPR1,FCER1G,HLA-DRA
Myc Mediated Apoptosis Signaling	2.78E00	1.38E-01		IGF1R,PIK3R3,PIK3CD,PIK3C2A,APAF1,PIK3R1,PIK3C3,PIK3C2G
Role of Osteoblasts, Osteoclasts and Chondrocytes in Rheumatoid Arthritis	2.78E00	8.41E-02		JUN,PIK3R3,PIK3C2A,TNFRSF1B,CHP1,SFRP1,COL1A1,PIK3R1,CSF1R,SFRP5,PIK3CD,FZD1,TCF7L2,SPP1,PIK3C2G,IL33,PIK3C3,MMP14
FAK Signaling	2.76E00	1.16E-01		PIK3R3,PIK3CD,PIK3C2A,CAPN6,ITGA4,ACTA2,PIK3R1,PIK3C3,PIK3C2G,PLCG2
14-3-3-mediated Signaling	2.76E00	1.03E-01		JUN,VIM,PIK3R3,PIK3CD,PIK3C2A,RPS6KA1,PLCH2,PLCE1,PIK3R1,PIK3C3,PIK3C2G,PLCG2
JAK/Stat Signaling	2.76E00	1.25E-01	3.000	JUN,PIK3R3,PIK3CD,PIK3C2A,STAT1,JAK3,PIK3R1,PIK3C3,PIK3C2G
Primary Immunodeficiency Signaling	2.75E00	1.52E-01		TAP2,JAK3,PTPRC,BLNK,TAP1,IL2RG,CIITA
CTLA4 Signaling in Cytotoxic T Lymphocytes	2.73E00	1.15E-01		LCP2,PIK3R3,HLA-A,PIK3CD,PIK3C2A,B2M,FCER1G,PIK3R1,PIK3C3,PIK3C2G
P2Y Purigenic Receptor Signaling Pathway	2.7E00	1.02E-01	3.317	JUN,PIK3R3,PIK3CD,PIK3C2A,GNB5,ADCY7,PLCH2,PLCE1,PIK3R1,PIK3C3,PIK3C2G,PLCG2
PAK Signaling	2.69E00	1.14E-01	3.162	PIK3R3,PIK3CD,PIK3C2A,EPHB3,PDGFRA,ITGA4,MYL9,PIK3R1,PIK3C3,PIK3C2G
Clathrin-mediated Endocytosis Signaling	2.68E00	8.7E-02		SH3KBP1,PIK3R3,TF,PIK3C2A,APOD,CHP1,ACTA2,PIK3R1,ITGB7,LYZ,PIK3CD,ITGB6,CLU,PIK3C2G,PIK3C3,ALB
CXCR4 Signaling	2.67E00	9.27E-02	3.051	JUN,ITPR2,PIK3R3,PIK3C2A,ADCY7,EGR1,MYL9,PIK3R1,CXCR4,PIK3CD,GNB5,ITPR1,PIK3C2G,PIK3C3
Cardiac Hypertrophy Signaling	2.65E00	8.18E-02	4.123	JUN,PIK3R3,PIK3C2A,ADCY7,CHP1,MAP3K12,PLCE1,MYL9,PIK3R1,PLCG2,IGF1R,PIK3CD,GNB5,PLCH2,RPS6KA1,ADRA2A,PIK3C2G,PIK3C3
Role of PI3K/AKT Signaling in the Pathogenesis of Influenza	2.64E00	1.31E-01		PIK3R3,PIK3CD,PIK3C2A,CCL5,PIK3R1,PLAC8,PIK3C3,PIK3C2G
Ephrin A Signaling	2.64E00	1.46E-01		PIK3R3,PIK3CD,PIK3C2A,PIK3R1,VAV1,PIK3C3,PIK3C2G
NF-κB Signaling	2.63E00	8.88E-02	3.357	PIK3R3,PIK3C2A,PDGFRA,TNFRSF1B,FCER1G,PIK3R1,PLCG2,IGF1R,PIK3CD,TLR3,GHR,TNIP1,PIK3C2G,IL33,PIK3C3
ERK/MAPK Signaling	2.63E00	8.6E-02	3.000	PIK3R3,PIK3C2A,PLA2G1B,PIK3R1,RAC2,ELF3,PLCG2,PIK3CD,STAT1,ELF4,RPS6KA1,ITGA4,DUSP6,PPP1R3A,PIK3C2G,PIK3C3
Thrombin Signaling	2.61E00	8.56E-02	3.357	ITPR2,ARHGEF3,PIK3R3,PIK3C2A,ADCY7,PLCE1,MYL9,PIK3R1,PLCG2,PIK3CD,GNB5,PLCH2,ITPR1,ARHGEF4,PIK3C2G,PIK3C3
Estrogen-Dependent Breast Cancer Signaling	2.6E00	1.29E-01		JUN,IGF1R,PIK3R3,PIK3CD,PIK3C2A,PIK3R1,PIK3C3,PIK3C2G
GM-CSF Signaling	2.6E00	1.29E-01	2.828	PIK3R3,PIK3CD,PIK3C2A,STAT1,CSF2RA,PIK3R1,PIK3C3,PIK3C2G
Type I Diabetes Mellitus Signaling	2.58E00	1.04E-01		IRF1,HLA-E,HLA-A,APAF1,HLA-DQA1,HLA-DQB1,STAT1,TNFRSF1B,HLA-DRB5,FCER1G,HLA-DRA
B Cell Receptor Signaling	2.58E00	8.77E-02		JUN,PIK3R3,PIK3C2A,MAP3K12,EGR1,PIK3R1,RAC2,VAV1,PLCG2,FCGR2B,PIK3CD,PTPRC,BLNK,PIK3C2G,PIK3C3
Death Receptor Signaling	2.58E00	1.1E-01	3.162	PARP10,PARP12,APAF1,ZC3HAV1,TNFRSF1B,PARP3,TNFRSF21,ACTA2,GAS2,ARHGDIB
Systemic Lupus Erythematosus Signaling	2.55E00	8.21E-02		JUN,HLA-E,PIK3R3,PIK3C2A,FCER1G,PIK3R1,RNPC3,PLCG2,CREM,HLA-A,FCGR2B,PIK3CD,PTPRC,LSM3,PIK3C2G,IL33,PIK3C3
SAPK/JNK Signaling	2.51E00	1.08E-01	3.162	JUN,PIK3R3,PIK3CD,PIK3C2A,MAP3K12,FCER1G,PIK3R1,RAC2,PIK3C3,PIK3C2G
CD40 Signaling	2.51E00	1.25E-01	2.828	JUN,PIK3R3,PIK3CD,PIK3C2A,JAK3,PIK3R1,PIK3C3,PIK3C2G
IL-17A Signaling in Airway Cells	2.51E00	1.25E-01		PIK3R3,PIK3CD,PIK3C2A,JAK3,PIK3R1,MUC5AC,PIK3C3,PIK3C2G
Nur77 Signaling in T Lymphocytes	2.49E00	1.37E-01		APAF1,HLA-DQA1,HLA-DQB1,HLA-DRB5,CHP1,FCER1G,HLA-DRA
Actin Cytoskeleton Signaling	2.48E00	8.1E-02		PIK3R3,PIK3C2A,CD14,TIAM1,MYL9,ACTA2,PIK3R1,RAC2,VAV1,FN1,PIK3CD,NCKAP1L,ITGA4,ARHGEF4,PFN2,PIK3C2G,PIK3C3
Angiopoietin Signaling	2.47E00	1.23E-01		PIK3R3,PIK3CD,PIK3C2A,TNIP1,PIK3R1,PIK3C3,PIK3C2G,GRB7
Endometrial Cancer Signaling	2.44E00	1.35E-01		PIK3R3,PIK3CD,PIK3C2A,ERBB2,PIK3R1,PIK3C3,PIK3C2G
Telomerase Signaling	2.41E00	1.04E-01	3.162	PIK3R3,PIK3CD,PIK3C2A,ELF4,IL2RB,PIK3R1,ELF3,IL2RG,PIK3C3,PIK3C2G
T Cell Receptor Signaling	2.41E00	1.04E-01		JUN,LCP2,PIK3R3,PIK3CD,PIK3C2A,PTPRC,PIK3R1,VAV1,PIK3C3,PIK3C2G
Role of Macrophages, Fibroblasts and Endothelial Cells in Rheumatoid Arthritis	2.41E00	7.32E-02		JUN,PIK3R3,PIK3C2A,CCL5,TNFRSF1B,CHP1,SFRP1,PLCE1,PIK3R1,VCAM1,PLCG2,SFRP5,FN1,PIK3CD,TLR3,FZD1,PLCH2,TCF7L2,PIK3C2G,IL33,PIK3C3
Altered T Cell and B Cell Signaling in Rheumatoid Arthritis	2.4E00	1.11E-01		TLR3,CXCL13,HLA-DQA1,HLA-DQB1,HLA-DRB5,FCER1G,SPP1,IL33,HLA-DRA
B Cell Development	2.4E00	1.79E-01		HLA-DQA1,HLA-DQB1,HLA-DRB5,PTPRC,HLA-DRA
UVB-Induced MAPK Signaling	2.39E00	1.32E-01	2.646	JUN,PIK3R3,PIK3CD,PIK3C2A,PIK3R1,PIK3C3,PIK3C2G
Erythropoietin Signaling	2.38E00	1.19E-01		JUN,PIK3R3,PIK3CD,PIK3C2A,PIK3R1,PIK3C3,PIK3C2G,PLCG2
Neurotrophin/TRK Signaling	2.38E00	1.19E-01	2.828	JUN,PIK3R3,PIK3CD,PIK3C2A,RPS6KA1,PIK3R1,PIK3C3,PIK3C2G
Communication between Innate and Adaptive Immune Cells	2.37E00	1.1E-01		HLA-E,HLA-A,TLR3,CCL5,HLA-DRB5,B2M,FCER1G,IL33,HLA-DRA
Phospholipases	2.34E00	1.3E-01		NAPEPLD,PLA2G1B,PLCH2,PLCE1,PLD4,PLD1,PLCG2
Melanocyte Development and Pigmentation Signaling	2.3E00	1.07E-01	3.000	PIK3R3,PIK3CD,PIK3C2A,ADCY7,RPS6KA1,PIK3R1,PIK3C3,PIK3C2G,PLCG2
Xenobiotic Metabolism Signaling	2.3E00	7.42E-02		PIK3R3,CYP3A7,PIK3C2A,ABCC2,UGT2B7,UGT2B10,GSTM3,FMO1,MAP3K12,PIK3R1,MGST1,SULT1C2,FMO5,SOD3,PIK3CD,CAT,CYP1B1,PIK3C2G,PIK3C3
Melanoma Signaling	2.29E00	1.43E-01		PIK3R3,PIK3CD,PIK3C2A,PIK3R1,PIK3C3,PIK3C2G
Superpathway of Inositol Phosphate Compounds	2.28E00	8.15E-02		PIK3R3,PIK3C2A,PLCE1,PLD4,PIK3R1,EPHX2,PLCG2,CILP,PIK3CD,ITPKB,NUDT4,PTPRC,SIRPA,PIK3C2G,PIK3C3
IL-6 Signaling	2.28E00	9.48E-02	3.000	JUN,PIK3R3,PIK3CD,PIK3C2A,CD14,TNFRSF1B,COL1A1,PIK3R1,IL33,PIK3C3,PIK3C2G
ErbB Signaling	2.27E00	1.06E-01		JUN,PIK3R3,PIK3CD,PIK3C2A,ERBB2,PIK3R1,PIK3C3,PIK3C2G,PLCG2
Aldosterone Signaling in Epithelial Cells	2.24E00	8.61E-02		ITPR2,PIK3R3,PIK3C2A,PLCE1,HSPA4L,PIK3R1,PLCG2,PIK3CD,PLCH2,ITPR1,DNAJC22,PIK3C2G,PIK3C3
Gap Junction Signaling	2.24E00	8.61E-02		ITPR2,PIK3R3,PIK3C2A,ADCY7,PLCE1,ACTA2,PIK3R1,PLCG2,PIK3CD,PLCH2,ITPR1,PIK3C2G,PIK3C3
RANK Signaling in Osteoclasts	2.23E00	1.05E-01		JUN,PIK3R3,PIK3CD,PIK3C2A,CHP1,MAP3K12,PIK3R1,PIK3C3,PIK3C2G
CREB Signaling in Neurons	2.23E00	8.28E-02	3.606	ITPR2,PIK3R3,PIK3C2A,ADCY7,PLCE1,PIK3R1,PLCG2,PIK3CD,GNB5,PLCH2,RPS6KA1,ITPR1,PIK3C2G,PIK3C3
Nicotine Degradation III	2.18E00	1.36E-01		POR,CYP3A7,UGT2B7,UGT2B10,CYP2S1,CYP1B1
ErbB4 Signaling	2.17E00	1.21E-01	2.646	PIK3R3,PIK3CD,PIK3C2A,PIK3R1,PIK3C3,PIK3C2G,PLCG2
LPS/IL-1 Mediated Inhibition of RXR Function	2.16E00	7.69E-02	0.000	HMGCS2,JUN,CYP3A7,ABCC2,CD14,TNFRSF1B,GSTM3,FMO1,PAPSS2,MGST1,SULT1C2,FMO5,SOD3,CAT,PLTP,IL33
LPS-stimulated MAPK Signaling	2.16E00	1.1E-01	2.828	JUN,PIK3R3,PIK3CD,PIK3C2A,CD14,PIK3R1,PIK3C3,PIK3C2G
NF-κB Activation by Viruses	2.16E00	1.1E-01	2.828	ITGAL,PIK3R3,PIK3CD,PIK3C2A,ITGA4,PIK3R1,PIK3C3,PIK3C2G
Antiproliferative Role of Somatostatin Receptor 2	2.09E00	1.17E-01	2.449	PIK3R3,PIK3CD,PIK3C2A,GNB5,PIK3R1,PIK3C3,PIK3C2G
Colorectal Cancer Metastasis Signaling	2.08E00	7.36E-02	3.873	JUN,PIK3R3,PIK3C2A,MMP2,ADCY7,JAK3,PIK3R1,PIK3CD,TLR3,GNB5,FZD1,STAT1,TCF7L2,ADRBK2,PIK3C2G,PIK3C3,MMP14
VEGF Family Ligand-Receptor Interactions	2.05E00	1.05E-01	2.828	PIK3R3,PIK3CD,PIK3C2A,PLA2G1B,PIK3R1,PIK3C3,PIK3C2G,PLCG2
Melatonin Degradation I	2.04E00	1.28E-01		POR,CYP3A7,UGT2B7,UGT2B10,CYP2S1,CYP1B1
Glioma Signaling	1.99E00	9.57E-02	3.000	IGF1R,PIK3R3,PIK3CD,PIK3C2A,PDGFRA,PIK3R1,PIK3C3,PIK3C2G,PLCG2
Mouse Embryonic Stem Cell Pluripotency	1.99E00	9.57E-02	3.000	PIK3R3,PIK3CD,PIK3C2A,FZD1,JAK3,TCF7L2,PIK3R1,PIK3C3,PIK3C2G
Antioxidant Action of Vitamin C	1.99E00	9.57E-02	-2.828	NAPEPLD,CSF2RA,PLA2G1B,PLCH2,PLCE1,PLD4,PLD1,SLC2A5,PLCG2
ILK Signaling	1.97E00	7.73E-02	3.606	JUN,PIK3R3,PIK3C2A,MYL9,ACTA2,PIK3R1,ITGB7,VIM,FN1,PIK3CD,ITGB6,FBLIM1,PIK3C2G,PIK3C3
Nitric Oxide Signaling in the Cardiovascular System	1.96E00	9.47E-02	2.828	ITPR2,PIK3R3,PIK3CD,PIK3C2A,ARG2,ITPR1,PIK3R1,PIK3C3,PIK3C2G
Ceramide Signaling	1.92E00	1E-01	-1.414	JUN,PIK3R3,PIK3CD,PIK3C2A,TNFRSF1B,PIK3R1,PIK3C3,PIK3C2G
Ovarian Cancer Signaling	1.92E00	8.46E-02		PIK3R3,PIK3CD,PIK3C2A,MMP2,FZD1,EDN1,TCF7L2,PIK3R1,CD44,PIK3C3,PIK3C2G
CCR3 Signaling in Eosinophils	1.92E00	8.85E-02		ITPR2,PIK3R3,PIK3CD,PIK3C2A,GNB5,PLA2G1B,ITPR1,PIK3R1,PIK3C3,PIK3C2G
Choline Biosynthesis III	1.91E00	2.31E-01		NAPEPLD,PLD4,PLD1
IGF-1 Signaling	1.9E00	9.28E-02	2.828	JUN,IGF1R,IGFBP4,PIK3R3,PIK3CD,PIK3C2A,PIK3R1,PIK3C3,PIK3C2G
Bupropion Degradation	1.9E00	1.67E-01		POR,CYP3A7,CYP2S1,CYP1B1
Galactose Degradation I (Leloir Pathway)	1.86E00	4E-01		GALE,GALM
Agrin Interactions at Neuromuscular Junction	1.84E00	1.04E-01	2.449	JUN,ITGAL,ERBB2,ITGA4,ACTA2,RAC2,LAMA2
Superpathway of Melatonin Degradation	1.84E00	1.15E-01		POR,CYP3A7,UGT2B7,UGT2B10,CYP2S1,CYP1B1
Acetone Degradation I (to Methylglyoxal)	1.84E00	1.6E-01		POR,CYP3A7,CYP2S1,CYP1B1
Gα12/13 Signaling	1.82E00	8.55E-02	2.530	JUN,PIK3R3,PIK3CD,PIK3C2A,MYL9,PIK3R1,CDH11,VAV1,PIK3C3,PIK3C2G
Dermatan Sulfate Degradation (Metazoa)	1.82E00	2.14E-01		HEXB,GM2A,CD44
Colanic Acid Building Blocks Biosynthesis	1.82E00	2.14E-01		PMM1,GALE,GMDS
eNOS Signaling	1.81E00	8.15E-02	2.828	ITPR2,PIK3R3,PIK3CD,PIK3C2A,ADCY7,ITPR1,PIK3R1,PIK3C3,PIK3C2G,PRKAB2,PLCG2
IL-10 Signaling	1.81E00	1.03E-01		JUN,FCGR2B,CD14,ARG2,IL4R,BLVRB,IL33
Breast Cancer Regulation by Stathmin1	1.8E00	7.37E-02		ITPR2,ARHGEF3,PIK3R3,PIK3C2A,ADCY7,PIK3R1,ARHGEF19,PIK3CD,GNB5,ITPR1,PPP1R3A,ARHGEF4,PIK3C2G,PIK3C3
TR/RXR Activation	1.78E00	9.41E-02		UCP2,PIK3R3,PIK3CD,PIK3C2A,SYT12,PIK3R1,PIK3C3,PIK3C2G
Renal Cell Carcinoma Signaling	1.77E00	1.01E-01	2.646	JUN,PIK3R3,PIK3CD,PIK3C2A,PIK3R1,PIK3C3,PIK3C2G
Cell Cycle Control of Chromosomal Replication	1.72E00	1.48E-01		MCM3,MCM6,MCM4,MCM5
Small Cell Lung Cancer Signaling	1.71E00	9.86E-02		PIK3R3,PIK3CD,PIK3C2A,APAF1,PIK3R1,PIK3C3,PIK3C2G
PEDF Signaling	1.71E00	9.86E-02	2.646	PIK3R3,PIK3CD,PIK3C2A,SERPINF1,PIK3R1,PIK3C3,PIK3C2G
Superoxide Radicals Degradation	1.7E00	3.33E-01		SOD3,CAT
IL-17 Signaling	1.68E00	9.72E-02		JUN,PIK3R3,PIK3CD,PIK3C2A,PIK3R1,PIK3C3,PIK3C2G
NGF Signaling	1.67E00	8.49E-02	3.000	PIK3R3,PIK3CD,PIK3C2A,MAP3K12,RPS6KA1,PIK3R1,PIK3C3,PIK3C2G,PLCG2
VEGF Signaling	1.67E00	8.99E-02	2.828	PIK3R3,PIK3CD,PIK3C2A,ACTA2,PIK3R1,PIK3C3,PIK3C2G,PLCG2
iNOS Signaling	1.62E00	1.16E-01	2.236	JUN,IRF1,CD14,STAT1,JAK3
Retinoic acid Mediated Apoptosis Signaling	1.59E00	1.02E-01	2.449	PARP10,PARP12,IRF1,APAF1,ZC3HAV1,PARP3
3-phosphoinositide Biosynthesis	1.57E00	7.48E-02		PIK3R3,PIK3CD,PIK3C2A,NUDT4,PTPRC,PIK3R1,SIRPA,PIK3C3,EPHX2,PIK3C2G,CILP
Cytotoxic T Lymphocyte-mediated Apoptosis of Target Cells	1.52E00	1.29E-01		HLA-A,APAF1,B2M,FCER1G
Type II Diabetes Mellitus Signaling	1.49E00	7.89E-02		PIK3R3,PIK3CD,PIK3C2A,TNFRSF1B,ADIPOR2,PIK3R1,PIK3C3,PIK3C2G,PRKAB2
Thiamin Salvage III	1.41E00	1E00		TPK1
Glutamine Biosynthesis I	1.41E00	1E00		GLUL
Sorbitol Degradation I	1.41E00	1E00		SORD
UDP-N-acetyl-D-galactosamine Biosynthesis I	1.41E00	1E00		GALE
HMGB1 Signaling	1.41E00	7.63E-02	3.000	JUN,PIK3R3,PIK3CD,PIK3C2A,TNFRSF1B,PIK3R1,VCAM1,PIK3C3,PIK3C2G
PTEN Signaling	1.41E00	7.63E-02	-1.000	IGF1R,PIK3R3,PIK3CD,BCL2L11,PDGFRA,GHR,ITGA4,PIK3R1,RAC2
Germ Cell-Sertoli Cell Junction Signaling	1.4E00	7.05E-02		LAMC3,PIK3R3,PIK3CD,PIK3C2A,PLS1,MAP3K12,ACTA2,PIK3R1,RAC2,PIK3C3,PIK3C2G
Interferon Signaling	1.39E00	1.18E-01		IRF1,STAT1,TAP1,PSMB8
Prostanoid Biosynthesis	1.35E00	2.22E-01		PTGIS,TBXAS1
α-Adrenergic Signaling	1.34E00	8.24E-02	2.449	ITPR2,GNB5,ADCY7,SLC8A1,ITPR1,ADRA2A,PLCG2
FGF Signaling	1.34E00	8.24E-02	2.646	PIK3R3,PIK3CD,PIK3C2A,ITPR1,PIK3R1,PIK3C3,PIK3C2G
Neuregulin Signaling	1.32E00	8.14E-02	1.633	PIK3R3,ERBB2,ITGA4,PIK3R1,ERRFI1,PLCG2,GRB7
Estrogen Biosynthesis	1.31E00	1.11E-01		POR,CYP3A7,CYP2S1,CYP1B1
TREM1 Signaling	1.3E00	8.7E-02	2.449	FCGR2B,TLR3,NLRC5,TYROBP,PLCG2,CIITA
Regulation of the Epithelial-Mesenchymal Transition Pathway	1.3E00	6.59E-02		PIK3R3,PIK3CD,PIK3C2A,MMP2,FZD1,JAK3,ZEB2,EGR1,TCF7L2,PIK3R1,PIK3C3,PIK3C2G
GPCR-Mediated Integration of Enteroendocrine Signaling Exemplified by an L Cell	1.28E00	8.57E-02		ITPR2,ADCY7,PLCH2,PLCE1,ITPR1,PLCG2
Notch Signaling	1.28E00	1.08E-01		DTX3,DTX4,FURIN,NUMBL
Apoptosis Signaling	1.27E00	7.95E-02	1.134	APAF1,BCL2L11,TNFRSF1B,CAPN6,RPS6KA1,GAS2,PLCG2
Role of Tissue Factor in Cancer	1.26E00	7.48E-02		PIK3R3,PIK3CD,PIK3C2A,RPS6KA1,EGR1,PIK3R1,PIK3C3,PIK3C2G
Huntington's Disease Signaling	1.25E00	6.19E-02		JUN,PIK3R3,PIK3C2A,APAF1,PENK,PIK3R1,PSME1,IGF1R,PIK3CD,GNB5,CAPN6,ITPR1,PIK3C2G,PIK3C3
Inhibition of Matrix Metalloproteases	1.24E00	1.05E-01		MMP2,THBS2,SDC2,MMP14
Role of NANOG in Mammalian Embryonic Stem Cell Pluripotency	1.22E00	7.34E-02	2.646	PIK3R3,PIK3CD,PIK3C2A,FZD1,JAK3,PIK3R1,PIK3C3,PIK3C2G
Molecular Mechanisms of Cancer	1.19E00	5.57E-02		JUN,ARHGEF3,PIK3R3,PIK3C2A,APAF1,BCL2L11,ADCY7,JAK3,GLI1,PIK3R1,RAC2,ARHGEF19,PIK3CD,FZD1,ITGA4,HIPK2,ARHGEF4,STK36,PIK3C2G,PIK3C3
Chronic Myeloid Leukemia Signaling	1.19E00	7.61E-02		PIK3R3,PIK3CD,PIK3C2A,MECOM,PIK3R1,PIK3C3,PIK3C2G
Human Embryonic Stem Cell Pluripotency	1.17E00	6.87E-02		PIK3R3,PIK3CD,PIK3C2A,PDGFRA,FZD1,TCF7L2,PIK3R1,PIK3C3,PIK3C2G
Role of PKR in Interferon Induction and Antiviral Response	1.17E00	1E-01		IRF1,APAF1,TLR3,STAT1
Neuroprotective Role of THOP1 in Alzheimer's Disease	1.17E00	1E-01		AGT,HLA-E,HLA-A,SERPINA3
Hereditary Breast Cancer Signaling	1.17E00	7.14E-02		PIK3R3,PIK3CD,PIK3C2A,FANCG,PIK3R1,WEE1,PIK3C3,PIK3C2G
Relaxin Signaling	1.16E00	6.82E-02		JUN,PIK3R3,PIK3CD,PIK3C2A,GNB5,ADCY7,PIK3R1,PIK3C3,PIK3C2G
RhoGDI Signaling	1.16E00	6.4E-02	-2.530	ARHGEF3,ARHGEF19,GNB5,ARHGAP4,ITGA4,MYL9,ACTA2,ARHGEF4,CDH11,CD44,ARHGDIB
Glutathione-mediated Detoxification	1.15E00	1.2E-01		GSTM3,ANPEP,MGST1
MIF Regulation of Innate Immunity	1.14E00	9.76E-02	2.000	JUN,CD74,CD14,PLA2G1B
Glucocorticoid Receptor Signaling	1.12E00	5.81E-02		JUN,PIK3R3,PIK3C2A,CCL5,CHP1,SLPI,JAK3,PIK3R1,VCAM1,AGT,PIK3CD,STAT1,PIK3C2G,PIK3C3,PRKAB2
Taurine Biosynthesis	1.12E00	5E-01		CDO1
Sulfate Activation for Sulfonation	1.12E00	5E-01		PAPSS2
GDP-L-fucose Biosynthesis I (from GDP-D-mannose)	1.12E00	5E-01		GMDS
D-myo-inositol (1,4,5)-Trisphosphate Biosynthesis	1.11E00	1.15E-01		PLCE1,PLD4,PLCG2
Synaptic Long Term Potentiation	1.1E00	6.9E-02		ITPR2,CHP1,RPS6KA1,PLCH2,PLCE1,ITPR1,PPP1R3A,PLCG2
Dopamine-DARPP32 Feedback in cAMP Signaling	1.08E00	6.37E-02	1.667	ITPR2,CREM,ADCY7,CHP1,PLCH2,PLCE1,KCNJ15,ITPR1,PPP1R3A,PLCG2
IL-15 Production	1.07E00	1.11E-01		IRF1,STAT1,JAK3
Bile Acid Biosynthesis, Neutral Pathway	1.06E00	1.54E-01		AKR1D1,SCP2
Prostate Cancer Signaling	1.05E00	7.5E-02		PIK3R3,PIK3CD,PIK3C2A,PIK3R1,PIK3C3,PIK3C2G
PCP pathway	1.04E00	8.06E-02		JUN,FZD1,SDC2,PFN2,SDC3
mTOR Signaling	1.02E00	6.04E-02	2.714	PIK3R3,PIK3CD,NAPEPLD,PIK3C2A,RPS6KA1,PLD4,PIK3R1,PLD1,PIK3C3,PIK3C2G,PRKAB2
PXR/RXR Activation	1.02E00	7.94E-02		HMGCS2,CYP3A7,ABCC2,SCD,PAPSS2
Sonic Hedgehog Signaling	1E00	1.03E-01		DYRK1B,GLI1,STK36
GPCR-Mediated Nutrient Sensing in Enteroendocrine Cells	9.95E-01	7.23E-02		ITPR2,ADCY7,PLCH2,PLCE1,ITPR1,PLCG2
Cellular Effects of Sildenafil (Viagra)	9.71E-01	6.45E-02		ITPR2,ADCY7,PLCH2,PLCE1,ITPR1,MYL9,ACTA2,PLCG2
Coenzyme A Biosynthesis	9.53E-01	3.33E-01		PPCDC
1,25-dihydroxyvitamin D3 Biosynthesis	9.53E-01	3.33E-01		POR
Tetrahydrobiopterin Biosynthesis I	9.53E-01	3.33E-01		PTS
Glutathione Redox Reactions II	9.53E-01	3.33E-01		TXNDC12
Tetrahydrobiopterin Biosynthesis II	9.53E-01	3.33E-01		PTS
L-serine Degradation	9.53E-01	3.33E-01		SRR
γ-glutamyl Cycle	9.5E-01	1.33E-01		OPLAH,ANPEP
G-Protein Coupled Receptor Signaling	9.38E-01	5.51E-02		PIK3R3,PIK3C2A,ADCY7,GABBR1,PIK3R1,RGS12,PIK3CD,RGS2,RPS6KA1,DUSP6,RGS10,ADRA2A,PIK3C2G,PIK3C3
CCR5 Signaling in Macrophages	9.35E-01	7.46E-02		JUN,CCL5,GNB5,FCER1G,PLCG2
Regulation of Actin-based Motility by Rho	9.23E-01	6.9E-02	2.449	ITGA4,MYL9,WIPF1,ACTA2,RAC2,PFN2
Cell Cycle: G2/M DNA Damage Checkpoint Regulation	9.22E-01	8.16E-02	0.000	TOP2A,RPS6KA1,HIPK2,WEE1
Chemokine Signaling	9.15E-01	7.35E-02	2.236	JUN,CXCR4,CCL5,PIK3C2G,PLCG2
Inhibition of Angiogenesis by TSP1	9.05E-01	9.38E-02		JUN,SDC2,THBS1
Role of JAK2 in Hormone-like Cytokine Signaling	9.05E-01	9.38E-02		STAT1,GHR,SIRPA
Extrinsic Prothrombin Activation Pathway	9.03E-01	1.25E-01		PROS1,F13A1
MIF-mediated Glucocorticoid Regulation	8.75E-01	9.09E-02		CD74,CD14,PLA2G1B
Glutathione Redox Reactions I	8.6E-01	1.18E-01		GPX2,MGST1
Ethanol Degradation IV	8.6E-01	1.18E-01		ACSS2,CAT
AMPK Signaling	8.59E-01	6.06E-02	2.828	PIK3R3,PIK3CD,PIK3C2A,ADRA2A,PIK3R1,PIK3C3,PIK3C2G,PRKAB2
Arsenate Detoxification I (Glutaredoxin)	8.37E-01	2.5E-01		AS3MT
Creatine-phosphate Biosynthesis	8.37E-01	2.5E-01		CKB
Heme Degradation	8.37E-01	2.5E-01		BLVRB
Biotin-carboxyl Carrier Protein Assembly	8.37E-01	2.5E-01		BTD
Arginine Degradation I (Arginase Pathway)	8.37E-01	2.5E-01		ARG2
L-cysteine Degradation I	8.37E-01	2.5E-01		CDO1
Ephrin B Signaling	8.22E-01	6.85E-02		CXCR4,EPHB3,GNB5,RAC2,VAV1
STAT3 Pathway	8.22E-01	6.85E-02		IGF1R,PDGFRA,KIAA1804,GHR,MAP3K12
Coagulation System	8.2E-01	8.57E-02		PROS1,SERPINA5,F13A1
D-myo-inositol-5-phosphate Metabolism	8.08E-01	5.88E-02		NUDT4,PLCE1,PTPRC,PLD4,SIRPA,EPHX2,PLCG2,CILP
Wnt/Ca+ pathway	7.91E-01	7.27E-02	2.000	FZD1,PLCH2,PLCE1,PLCG2
VDR/RXR Activation	7.54E-01	6.49E-02		CCL5,S100G,CD14,SEMA3B,SPP1
Acetate Conversion to Acetyl-CoA	7.48E-01	2E-01		ACSS2
PPARα/RXRα Activation	7.26E-01	5.45E-02	-2.333	JUN,ACADL,ADCY7,GHR,ADIPOR2,PLCH2,PLCE1,PRKAB2,PLCG2
Wnt/β-catenin Signaling	7.15E-01	5.42E-02	0.000	JUN,SFRP5,FZD1,SOX9,SFRP1,TCF7L2,SOX4,TLE4,CD44
Activation of IRF by Cytosolic Pattern Recognition Receptors	6.98E-01	6.67E-02	2.000	JUN,STAT1,IFIH1,DDX58
Eicosanoid Signaling	6.81E-01	6.56E-02		ALOX12,PLA2G1B,PTGIS,TBXAS1
Urea Cycle	6.77E-01	1.67E-01		ARG2
Arginine Degradation VI (Arginase 2 Pathway)	6.77E-01	1.67E-01		ARG2
UDP-N-acetyl-D-glucosamine Biosynthesis II	6.77E-01	1.67E-01		GFPT2
Ceramide Degradation	6.77E-01	1.67E-01		NAAA
GDP-mannose Biosynthesis	6.77E-01	1.67E-01		PMM1
Insulin Receptor Signaling	6.47E-01	5.47E-02		PIK3R3,PIK3CD,PIK3C2A,PIK3R1,PPP1R3A,PIK3C3,PIK3C2G
Corticotropin Releasing Hormone Signaling	6.35E-01	5.61E-02		JUN,ITPR2,ADCY7,GLI1,ITPR1,PLCG2
Lipid Antigen Presentation by CD1	6.26E-01	8.33E-02		B2M,FCER1G
Tumoricidal Function of Hepatic Natural Killer Cells	6.26E-01	8.33E-02		ITGAL,APAF1
Pregnenolone Biosynthesis	6.18E-01	1.43E-01		MICAL1
IL-17A Signaling in Gastric Cells	6.01E-01	8E-02		JUN,CCL5
Protein Kinase A Signaling	5.79E-01	4.59E-02		ITPR2,CDC14B,ADCY7,CHP1,PLCE1,MYL9,PLCG2,CREM,GNB5,PLCH2,ITPR1,DUSP6,PTPRC,TCF7L2,PPP1R3A,SIRPA,PTPRS
Thyroid Hormone Metabolism II (via Conjugation and/or Degradation)	5.76E-01	7.69E-02		UGT2B7,UGT2B10
Synaptic Long Term Depression	5.75E-01	5.19E-02	2.646	IGF1R,ITPR2,PLA2G1B,PLCH2,PLCE1,ITPR1,PLCG2
Airway Pathology in Chronic Obstructive Pulmonary Disease	5.69E-01	1.25E-01		MMP2
Sphingosine and Sphingosine-1-phosphate Metabolism	5.69E-01	1.25E-01		NAAA
Sucrose Degradation V (Mammalian)	5.69E-01	1.25E-01		GALM
Citrulline Biosynthesis	5.69E-01	1.25E-01		ARG2
Salvage Pathways of Pyrimidine Deoxyribonucleotides	5.69E-01	1.25E-01		APOBEC3B
Sphingomyelin Metabolism	5.69E-01	1.25E-01		SGMS2
Sperm Motility	5.67E-01	5.31E-02	2.449	ITPR2,PLA2G1B,PLCH2,PLCE1,ITPR1,PLCG2
Basal Cell Carcinoma Signaling	5.59E-01	5.8E-02		FZD1,GLI1,TCF7L2,STK36
TNFR2 Signaling	5.31E-01	7.14E-02		JUN,TNFRSF1B
Pathogenesis of Multiple Sclerosis	5.25E-01	1.11E-01		CCL5
UDP-N-acetyl-D-galactosamine Biosynthesis II	5.25E-01	1.11E-01		GALE
Toll-like Receptor Signaling	5.2E-01	5.56E-02	2.000	JUN,TLR3,CD14,IL33
Regulation of eIF4 and p70S6K Signaling	5.11E-01	4.93E-02	2.646	PIK3R3,PIK3CD,PIK3C2A,ITGA4,PIK3R1,PIK3C3,PIK3C2G
CD27 Signaling in Lymphocytes	5.03E-01	5.88E-02		JUN,APAF1,MAP3K12
RhoA Signaling	4.98E-01	5E-02	1.633	IGF1R,ARHGAP4,MYL9,ACTA2,PLD1,PFN2
Gαi Signaling	4.98E-01	5E-02	-0.447	GNB5,ADCY7,GABBR1,RGS10,ADRA2A,RGS12
Ketogenesis	4.88E-01	1E-01		HMGCS2
Oleate Biosynthesis II (Animals)	4.88E-01	1E-01		SCD
Histidine Degradation VI	4.88E-01	1E-01		MICAL1
Glycine Betaine Degradation	4.88E-01	1E-01		SRR
Calcium Signaling	4.76E-01	4.71E-02	1.342	TPM3,ITPR2,CHP1,SLC8A1,ITPR1,MYL9,ACTA2,PNCK
G Protein Signaling Mediated by Tubby	4.72E-01	6.45E-02		GNB5,PLCG2
Superpathway of Methionine Degradation	4.72E-01	6.45E-02		CDO1,AHCYL2
Ephrin Receptor Signaling	4.61E-01	4.65E-02		CXCR4,EPHB3,GNB5,SDC2,ITGA4,WIPF1,RAC2,PIK3C2G
Cholecystokinin/Gastrin-mediated Signaling	4.55E-01	4.95E-02	2.236	JUN,ITPR2,CREM,ITPR1,IL33
Regulation of IL-2 Expression in Activated and Anergic T Lymphocytes	4.5E-01	5.13E-02		JUN,CHP1,VAV1,PLCG2
GNRH Signaling	4.37E-01	4.72E-02	2.449	JUN,ITPR2,ADCY7,MAP3K12,ITPR1,EGR1
Mevalonate Pathway I	4.24E-01	8.33E-02		HMGCS2
BER pathway	4.24E-01	8.33E-02		LIG1
Oncostatin M Signaling	4.21E-01	5.88E-02		STAT1,JAK3
Protein Ubiquitination Pathway	4.08E-01	4.33E-02		HLA-A,TAP2,USP54,DNAJC22,B2M,HSPA4L,USP18,PSME1,TAP1,NEDD4L,PSMB8
IL-17A Signaling in Fibroblasts	4.05E-01	5.71E-02		JUN,NFKBIZ
Induction of Apoptosis by HIV1	3.99E-01	5.08E-02		CXCR4,APAF1,TNFRSF1B
Ubiquinol-10 Biosynthesis (Eukaryotic)	3.97E-01	7.69E-02		MICAL1
Guanosine Nucleotides Degradation III	3.97E-01	7.69E-02		NT5E
DNA Double-Strand Break Repair by Homologous Recombination	3.73E-01	7.14E-02		LIG1
Superpathway of Citrulline Metabolism	3.73E-01	7.14E-02		ARG2
Urate Biosynthesis/Inosine 5'-phosphate Degradation	3.73E-01	7.14E-02		NT5E
Bladder Cancer Signaling	3.71E-01	4.65E-02		MMP2,ERBB2,THBS1,MMP14
Oxidative Ethanol Degradation III	3.51E-01	6.67E-02		ACSS2
Netrin Signaling	3.5E-01	5.13E-02		CHP1,RAC2
cAMP-mediated signaling	3.42E-01	4.17E-02	-0.333	CREM,ADCY7,GABBR1,RGS2,RPS6KA1,DUSP6,RGS10,ADRA2A,RGS12
PPAR Signaling	3.38E-01	4.44E-02	-2.000	JUN,PDGFRA,TNFRSF1B,IL33
Tight Junction Signaling	3.37E-01	4.22E-02		JUN,RAB13,TNFRSF1B,TIAM1,CLDN4,MYL9,ACTA2
Transcriptional Regulatory Network in Embryonic Stem Cells	3.37E-01	5E-02		TRIM24,L1CAM
Granzyme B Signaling	3.3E-01	6.25E-02		APAF1
Adenosine Nucleotides Degradation II	3.3E-01	6.25E-02		NT5E
Methionine Degradation I (to Homocysteine)	3.3E-01	6.25E-02		AHCYL2
Superpathway of Geranylgeranyldiphosphate Biosynthesis I (via Mevalonate)	3.3E-01	6.25E-02		HMGCS2
p38 MAPK Signaling	3.25E-01	4.27E-02	2.000	STAT1,TNFRSF1B,PLA2G1B,RPS6KA1,IL33
Role of RIG1-like Receptors in Antiviral Innate Immunity	3.25E-01	4.88E-02		IFIH1,DDX58
Mechanisms of Viral Exit from Host Cells	3.25E-01	4.88E-02		VPS37C,ACTA2
Role of Hypercytokinemia/hyperchemokinemia in the Pathogenesis of Influenza	3.25E-01	4.88E-02		CCL5,IL33
Melatonin Signaling	3.09E-01	4.41E-02		PLCH2,PLCE1,PLCG2
D-myo-inositol (1,4,5,6)-Tetrakisphosphate Biosynthesis	3.05E-01	4.17E-02		NUDT4,PTPRC,SIRPA,EPHX2,CILP
D-myo-inositol (3,4,5,6)-tetrakisphosphate Biosynthesis	3.05E-01	4.17E-02		NUDT4,PTPRC,SIRPA,EPHX2,CILP
Serotonin Receptor Signaling	3.03E-01	4.65E-02		ADCY7,PTS
PI3K/AKT Signaling	2.99E-01	4.13E-02	0.447	PIK3R3,PIK3CD,JAK3,ITGA4,PIK3R1
RAR Activation	2.98E-01	4.05E-02		JUN,PIK3R3,PIK3CD,ADCY7,TNIP1,PIK3R1,TRIM24
Differential Regulation of Cytokine Production in Macrophages and T Helper Cells by IL-17A and IL-17F	2.94E-01	5.56E-02		CCL5
Cysteine Biosynthesis III (mammalia)	2.94E-01	5.56E-02		AHCYL2
1D-myo-inositol Hexakisphosphate Biosynthesis II (Mammalian)	2.78E-01	5.26E-02		ITPKB
Purine Nucleotides Degradation II (Aerobic)	2.78E-01	5.26E-02		NT5E
D-myo-inositol (1,3,4)-trisphosphate Biosynthesis	2.78E-01	5.26E-02		ITPKB
nNOS Signaling in Neurons	2.72E-01	4.35E-02		CAPN6,CHP1
DNA Methylation and Transcriptional Repression Signaling	2.64E-01	5E-02		CHD3
TNFR1 Signaling	2.63E-01	4.26E-02		JUN,APAF1
NAD Salvage Pathway II	2.5E-01	4.76E-02		NT5E
Pyrimidine Deoxyribonucleotides De Novo Biosynthesis I	2.5E-01	4.76E-02		RRM1
Dopamine Receptor Signaling	2.4E-01	3.9E-02		ADCY7,PTS,PPP1R3A
Polyamine Regulation in Colon Cancer	2.37E-01	4.55E-02		PSME1
Differential Regulation of Cytokine Production in Intestinal Epithelial Cells by IL-17A and IL-17F	2.25E-01	4.35E-02		CCL5
IL-22 Signaling	2.14E-01	4.17E-02		STAT1
Role of JAK1, JAK2 and TYK2 in Interferon Signaling	2.14E-01	4.17E-02		STAT1
Superpathway of D-myo-inositol (1,4,5)-trisphosphate Metabolism	2.14E-01	4.17E-02		ITPKB
Role of JAK family kinases in IL-6-type Cytokine Signaling	2.03E-01	4E-02		STAT1
Gluconeogenesis I	2.03E-01	4E-02		ME3

## Sheet: Canonical Pathways DOWN 2-fold
© 2000-2015 QIAGEN. All rights reserved.
Ingenuity Canonical Pathways	-log(p-value)	Ratio	z-score	Molecules
Superpathway of Serine and Glycine Biosynthesis I	6.83	0.714		PSAT1,PSPH,PHGDH,SHMT2,DUSP26
Serine Biosynthesis	5.82	0.8		PSAT1,PSPH,PHGDH,DUSP26
Unfolded protein response	5.42	0.17		INSIG1,ATF4,SEL1L,PDIA2,ERO1LB,ATF6,CEBPA,EIF2AK3,P4HB
Phenylalanine Degradation I (Aerobic)	4.28	0.75		QDPR,PAH,PCBD1
Triacylglycerol Degradation	3.67	0.208		CEL,PNLIPRP2,PNLIPRP1,PNLIP,MGLL
Glycine Degradation (Creatine Biosynthesis)	3.25	1		GAMT,GATM
Cysteine Biosynthesis/Homocysteine Degradation	3.25	1		CBS/LOC102724560,CTH
Retinol Biosynthesis	3.2	0.167		CEL,PNLIPRP2,PNLIPRP1,RDH11,PNLIP
Citrulline Biosynthesis	3.17	0.375		ALDH18A1,LOC102724788/PRODH,GLS2
Cysteine Biosynthesis III (mammalia)	3.14	0.222		CBS/LOC102724560,MAT1A,CTH,AHCY
Endoplasmic Reticulum Stress Pathway	2.87	0.19		ATF4,CASP9,ATF6,EIF2AK3
Glycine Betaine Degradation	2.85	0.3		PIPOX,SHMT2,SARDH
Tyrosine Biosynthesis IV	2.78	0.667		PAH,PCBD1
PI3K Signaling in B Lymphocytes	2.58	0.0732		FYN,ATF4,RRAS2,AKT1,NFATC2,PLCB4,ATF5,ATF6,PRKCZ
Prostate Cancer Signaling	2.54	0.0875		ATF4,RRAS2,AKT1,CCND1,CASP9,KLK3,GSTP1
G-Protein Coupled Receptor Signaling	2.51	0.0551		PDE4A,AKT1,RRAS2,PLCB4,P2RY14,VIPR1,RAP1GAP,PDE2A,FYN,ATF4,PDE8B,GNA14,PTGER3,ADORA1
Branched-chain α-keto acid Dehydrogenase Complex	2.49	0.5		DBT,BCKDHB
Proline Biosynthesis I	2.49	0.5		PYCR1,ALDH18A1
Superpathway of Citrulline Metabolism	2.4	0.214		ALDH18A1,LOC102724788/PRODH,GLS2
Superpathway of Methionine Degradation	2.23	0.129		CBS/LOC102724560,MAT1A,CTH,AHCY
Nitric Oxide Signaling in the Cardiovascular System	2.13	0.0737	-1.633	AKT1,SLC7A1,PGF,PDE2A,VEGFB,CACNA1A,PRKCZ
Endometrial Cancer Signaling	2.12	0.0962		MYC,RRAS2,AKT1,CCND1,CASP9
Role of Macrophages, Fibroblasts and Endothelial Cells in Rheumatoid Arthritis	2.05	0.0488		AKT1,RRAS2,NFATC2,PLCB4,PGF,CEBPA,PRSS1,MYC,ATF4,CCND1,PRSS3,PRSS2,VEGFB,PRKCZ
Acute Myeloid Leukemia Signaling	2.03	0.0789	-1.342	MYC,RRAS2,AKT1,CCND1,CEBPA,EIF4EBP1
Heparan Sulfate Biosynthesis	2.02	0.0909		CHST2,HS3ST3B1,B3GALT6,EXTL1,EXTL3
Maturity Onset Diabetes of Young (MODY) Signaling	1.95	0.15		GCK,ALDOB,CACNA1A
Myc Mediated Apoptosis Signaling	1.92	0.0862		MYC,RRAS2,AKT1,CASP9,PRKCZ
Thyroid Cancer Signaling	1.88	0.103		MYC,RRAS2,CCND1,KLK3
Axonal Guidance Signaling	1.87	0.0423		RRAS2,AKT1,NFATC2,NTN1,PLCB4,PGF,UNC5A,PLXND1,FYN,MKNK1,TUBA4A,GNA14,ADAMTS9,ADAMTS7,VEGFB,PRKCZ,BMP3,PLXNA2
ERK/MAPK Signaling	1.87	0.0538	-1.265	HIST1H3C,HSPB1,MYC,FYN,ATF4,RRAS2,PPP1R14B,MKNK1,DUSP2,EIF4EBP1
Estrogen-Dependent Breast Cancer Signaling	1.81	0.0806		ATF4,RRAS2,AKT1,CCND1,HSD17B13
Bladder Cancer Signaling	1.79	0.0698		MYC,RRAS2,CCND1,FGF21,PGF,VEGFB
ERK5 Signaling	1.78	0.0794	-2	MYC,ATF4,RRAS2,AKT1,PRKCZ
Wnt/β-catenin Signaling	1.75	0.0542	-0.378	MYC,AKT1,SOX12,APPL2,CCND1,SOX7,NR5A2,DVL3,UBC
Superpathway of D-myo-inositol (1,4,5)-trisphosphate Metabolism	1.73	0.125		INPP1,SYNJ2,ITPKA
Threonine Degradation II	1.63	1		GCAT
L-cysteine Degradation II	1.63	1		CTH
Heparan Sulfate Biosynthesis (Late Stages)	1.57	0.0833		CHST2,HS3ST3B1,EXTL1,EXTL3
FXR/RXR Activation	1.53	0.056		PCK2,VTN,AKT1,PPARA,FETUB,LCAT,NR5A2
Insulin Receptor Signaling	1.48	0.0547		FYN,RRAS2,AKT1,PPP1R14B,SYNJ2,PRKCZ,EIF4EBP1
cAMP-mediated signaling	1.47	0.0463	-3	ATF4,PDE4A,PDE8B,P2RY14,VIPR1,RAP1GAP,CAMK1D,PDE2A,PTGER3,ADORA1
HER-2 Signaling in Breast Cancer	1.47	0.0658		RRAS2,AKT1,CCND1,CASP9,PRKCZ
VEGF Family Ligand-Receptor Interactions	1.47	0.0658	-2.236	RRAS2,AKT1,PGF,VEGFB,PRKCZ
VDR/RXR Activation	1.44	0.0649		SERPINB1,BGLAP,TRPV6,PRKCZ,CEBPA
UVB-Induced MAPK Signaling	1.44	0.0755		HIST1H3C,AKT1,PRKCZ,EIF4EBP1
Wnt/Ca+ pathway	1.39	0.0727	-2	ATF4,NFATC2,PLCB4,DVL3
Role of Tissue Factor in Cancer	1.38	0.0561		FYN,RRAS2,AKT1,GNA14,PDIA2,P4HB
eNOS Signaling	1.38	0.0519	-1.342	AKT1,SLC7A1,PGF,CASP9,VEGFB,AQP8,PRKCZ
ErbB2-ErbB3 Signaling	1.36	0.0714	-2	MYC,RRAS2,AKT1,CCND1
Proline Degradation	1.33	0.5		LOC102724788/PRODH
Putrescine Biosynthesis III	1.33	0.5		ODC1
Glycine Biosynthesis I	1.33	0.5		SHMT2
Glutamine Degradation I	1.33	0.5		GLS2
tRNA Splicing	1.31	0.0857		PDE4A,PDE8B,PDE2A
Sperm Motility	1.28	0.0531	-2.449	PDE4A,PLCB4,LCAT,PDE2A,PRKCZ,PTK7
Methionine Degradation I (to Homocysteine)	1.27	0.125		MAT1A,AHCY
Synaptic Long Term Potentiation	1.24	0.0517		ATF4,RRAS2,PPP1R14B,PLCB4,GNA14,PRKCZ
14-3-3-mediated Signaling	1.24	0.0517		RRAS2,AKT1,PLCB4,TUBA4A,MAPT,PRKCZ
p38 MAPK Signaling	1.22	0.0513	-2.236	HIST1H3C,HSPB1,MYC,ATF4,MKNK1,MAPT
tRNA Charging	1.22	0.0789		LARS2,MARS2,WARS
P2Y Purigenic Receptor Signaling Pathway	1.21	0.0508	-2.449	MYC,ATF4,RRAS2,AKT1,PLCB4,PRKCZ
PTEN Signaling	1.21	0.0508	0.816	RRAS2,AKT1,CCND1,CASP9,SYNJ2,PRKCZ
Hypoxia Signaling in the Cardiovascular System	1.21	0.0635		UBE2F,ATF4,AKT1,P4HB
Netrin Signaling	1.19	0.0769		NFATC2,NTN1,UNC5A
Valine Degradation I	1.18	0.111		DBT,BCKDHB
D-myo-inositol (1,4,5)-trisphosphate Degradation	1.18	0.111		INPP1,SYNJ2
PI3K/AKT Signaling	1.17	0.0496	-1.342	RRAS2,AKT1,CCND1,SYNJ2,PRKCZ,EIF4EBP1
Angiopoietin Signaling	1.17	0.0615		ANGPTL1,RRAS2,AKT1,CASP9
Non-Small Cell Lung Cancer Signaling	1.17	0.0615	-1	RRAS2,AKT1,CCND1,CASP9
Trehalose Degradation II (Trehalase)	1.16	0.333		GCK
Tetrahydrobiopterin Biosynthesis I	1.16	0.333		GCH1
Spermidine Biosynthesis I	1.16	0.333		SRM
Tetrahydrobiopterin Biosynthesis II	1.16	0.333		GCH1
S-adenosyl-L-methionine Biosynthesis	1.16	0.333		MAT1A
Glioma Signaling	1.14	0.0532	-2.236	RRAS2,AKT1,CCND1,CAMK1D,PRKCZ
1D-myo-inositol Hexakisphosphate Biosynthesis II (Mammalian)	1.13	0.105		SYNJ2,ITPKA
D-myo-inositol (1,3,4)-trisphosphate Biosynthesis	1.13	0.105		SYNJ2,ITPKA
Neurotrophin/TRK Signaling	1.13	0.0597	-2	ATF4,RRAS2,AKT1,KLK3
Cellular Effects of Sildenafil (Viagra)	1.13	0.0484		KCNN1,PDE4A,PLCB4,PDE2A,PABPC4,CACNA1A
Melanoma Signaling	1.11	0.0714		RRAS2,AKT1,CCND1
Protein Ubiquitination Pathway	1.09	0.0394		HSPB1,UBE2F,CRYAB,UCHL5,THOP1,USP31,PSMD6,PSMB10,USP43,UBC
Serotonin Receptor Signaling	1.09	0.0698		GCH1,QDPR,PCBD1
CDK5 Signaling	1.08	0.051	-1.342	RRAS2,PPP1R14B,MAPT,CACNA1A,CABLES1
GPCR-Mediated Integration of Enteroendocrine Signaling Exemplified by an L Cell	1.07	0.0571		PLCB4,VIPR1,GNA14,GAL
FLT3 Signaling in Hematopoietic Progenitor Cells	1.06	0.0563		ATF4,RRAS2,AKT1,EIF4EBP1
Small Cell Lung Cancer Signaling	1.06	0.0563		MYC,AKT1,CCND1,CASP9
Biotin-carboxyl Carrier Protein Assembly	1.04	0.25		ACACB
NAD Biosynthesis III	1.04	0.25		NMNAT2
Relaxin Signaling	1.03	0.0455		AKT1,PDE4A,PDE8B,GNA14,PDE2A,PRKCZ
Polyamine Regulation in Colon Cancer	1.02	0.0909		MYC,ODC1
Prolactin Signaling	1.02	0.0548	-2	MYC,FYN,RRAS2,PRKCZ
IL-4 Signaling	1.02	0.0548		RRAS2,AKT1,NFATC2,SYNJ2
Aryl Hydrocarbon Receptor Signaling	0.991	0.0444		HSPB1,MYC,CCND1,ALDH1L2,ALDH18A1,GSTP1
Endothelin-1 Signaling	0.988	0.0419	-1.89	MYC,RRAS2,PLCB4,CASP9,LCAT,GNA14,PRKCZ
Protein Kinase A Signaling	0.987	0.0351		PDE4A,NFATC2,NTN1,PLCB4,PDE2A,DUSP26,DUSP2,PTPRJ,HIST1H3C,ATF4,PPP1R14B,PDE8B,PRKCZ
Pancreatic Adenocarcinoma Signaling	0.969	0.0472	-1.342	AKT1,CCND1,PGF,CASP9,VEGFB
IL-22 Signaling	0.959	0.0833		AKT1,IL22RA1
Estrogen-mediated S-phase Entry	0.959	0.0833		MYC,CCND1
Dopamine Receptor Signaling	0.959	0.0519		GCH1,PPP1R14B,QDPR,PCBD1
Protein Citrullination	0.947	0.2		PADI2
NAD Salvage Pathway III	0.947	0.2		NMNAT2
Lysine Degradation V	0.947	0.2		PIPOX
dTMP De Novo Biosynthesis	0.947	0.2		SHMT2
Folate Polyglutamylation	0.947	0.2		SHMT2
Natural Killer Cell Signaling	0.944	0.0463		FYN,RRAS2,AKT1,SYNJ2,PRKCZ
Ephrin Receptor Signaling	0.939	0.0407		FYN,ATF4,RRAS2,AKT1,PGF,GNA14,VEGFB
Fc Epsilon RI Signaling	0.931	0.0459	-1.342	FYN,RRAS2,AKT1,SYNJ2,PRKCZ
Pyrimidine Ribonucleotides Interconversion	0.929	0.08		ENTPD1,CMPK2
Chondroitin Sulfate Biosynthesis	0.902	0.0577		CHST2,HS3ST3B1,B3GALT6
Hereditary Breast Cancer Signaling	0.895	0.0446		SLC19A1,RRAS2,AKT1,CCND1,UBC
IL-15 Production	0.874	0.0741		PRKCZ,PTK7
Pyrimidine Ribonucleotides De Novo Biosynthesis	0.874	0.0741		ENTPD1,CMPK2
NAD Biosynthesis from 2-amino-3-carboxymuconate Semialdehyde	0.873	0.167		NMNAT2
Proline Biosynthesis II (from Arginine)	0.873	0.167		PYCR1
Arginine Degradation VI (Arginase 2 Pathway)	0.873	0.167		PYCR1
Acetyl-CoA Biosynthesis I (Pyruvate Dehydrogenase Complex)	0.873	0.167		DBT
Selenocysteine Biosynthesis II (Archaea and Eukaryotes)	0.873	0.167		SEPHS2
GDP-glucose Biosynthesis	0.873	0.167		GCK
ILK Signaling	0.856	0.0387	-2.646	MYC,ATF4,AKT1,PPP1R14B,CCND1,PGF,VEGFB
Thrombopoietin Signaling	0.849	0.0545		MYC,RRAS2,PRKCZ
Dermatan Sulfate Biosynthesis	0.849	0.0545		CHST2,HS3ST3B1,B3GALT6
IL-8 Signaling	0.838	0.0383	-2.646	RRAS2,AKT1,CCND1,PGF,VEGFB,PRKCZ,EIF4EBP1
Glutamate Receptor Signaling	0.833	0.0536		HOMER2,SLC1A4,SLC1A3
Neuregulin Signaling	0.832	0.0465	-2	MYC,RRAS2,AKT1,PRKCZ
FAK Signaling	0.832	0.0465		FYN,RRAS2,AKT1,ARHGAP26
p70S6K Signaling	0.827	0.0424	-2.236	RRAS2,AKT1,PLCB4,MAPT,PRKCZ
Gustation Pathway	0.827	0.0424		P2RX1,PDE4A,PDE8B,P2RY14,PDE2A
Gap Junction Signaling	0.825	0.0397		BGLAP,RRAS2,AKT1,PLCB4,TUBA4A,PRKCZ
Glucose and Glucose-1-phosphate Degradation	0.811	0.143		GCK
Glycoaminoglycan-protein Linkage Region Biosynthesis	0.811	0.143		B3GALT6
Xenobiotic Metabolism Signaling	0.808	0.0352		CHST2,HS3ST3B1,RRAS2,ALDH1L2,ALDH18A1,CAMK1D,GSTP1,PRKCZ,EIF2AK3
G Beta Gamma Signaling	0.807	0.0455		RRAS2,AKT1,GNA14,PRKCZ
Gαi Signaling	0.806	0.0417		RRAS2,P2RY14,RAP1GAP,PTGER3,ADORA1
Retinoate Biosynthesis I	0.801	0.0667		RDH11,SDR9C7
ErbB4 Signaling	0.801	0.0517		RRAS2,AKT1,PRKCZ
Virus Entry via Endocytic Pathways	0.794	0.0449		FYN,RRAS2,PRKCZ,TFRC
VEGF Signaling	0.794	0.0449	-2	RRAS2,AKT1,PGF,VEGFB
Dopamine-DARPP32 Feedback in cAMP Signaling	0.77	0.0382	-1.633	ATF4,PPP1R14B,PLCB4,CAMKK1,CACNA1A,PRKCZ
Chronic Myeloid Leukemia Signaling	0.759	0.0435		MYC,RRAS2,AKT1,CCND1
Airway Pathology in Chronic Obstructive Pulmonary Disease	0.758	0.125		CELA2A
Sucrose Degradation V (Mammalian)	0.758	0.125		ALDOB
Inhibition of Angiogenesis by TSP1	0.757	0.0625		FYN,AKT1
Eicosanoid Signaling	0.755	0.0492		GGT1,LCAT,PTGER3
PCP pathway	0.741	0.0484		HSPB1,CELSR1,DVL3
GM-CSF Signaling	0.741	0.0484		RRAS2,AKT1,CCND1
GNRH Signaling	0.736	0.0394	-2.236	ATF4,RRAS2,PLCB4,GNA14,PRKCZ
Triacylglycerol Biosynthesis	0.736	0.0606		DBT,PPAPDC1B
Mouse Embryonic Stem Cell Pluripotency	0.736	0.0426	-2	MYC,RRAS2,AKT1,DVL3
Colorectal Cancer Metastasis Signaling	0.736	0.0346	-2.121	MYC,RRAS2,AKT1,CCND1,PGF,CASP9,VEGFB,PTGER3
PXR/RXR Activation	0.727	0.0476		PCK2,AKT1,PPARA
Cell Cycle: G1/S Checkpoint Regulation	0.727	0.0476		GNL3,MYC,CCND1
Calcium Transport I	0.712	0.111		ATP2C2
UDP-N-acetyl-D-galactosamine Biosynthesis II	0.712	0.111		GCK
Folate Transformations I	0.712	0.111		SHMT2
Ovarian Cancer Signaling	0.708	0.0385		RRAS2,AKT1,CCND1,PGF,VEGFB
Amyotrophic Lateral Sclerosis Signaling	0.703	0.0412		PGF,CASP9,VEGFB,CACNA1A
IGF-1 Signaling	0.703	0.0412	-1	RRAS2,AKT1,CASP9,PRKCZ
Tight Junction Signaling	0.695	0.0361		CLDN10,AKT1,CPSF4,CLDN9,PRKCZ,CEBPA
Role of NFAT in Regulation of the Immune Response	0.695	0.0361	-2.449	FYN,RRAS2,AKT1,NFATC2,PLCB4,GNA14
p53 Signaling	0.692	0.0408		GNL3,AKT1,CCND1,RPRM
Cardiac β-adrenergic Signaling	0.69	0.0379	-1.342	PDE4A,PDE8B,PPP1R14B,PDE2A,CACNA1A
Role of MAPK Signaling in the Pathogenesis of Influenza	0.687	0.0455		RRAS2,AKT1,LCAT
GABA Receptor Signaling	0.687	0.0455		KCNN1,GABRA4,UBC
Neuropathic Pain Signaling In Dorsal Horn Neurons	0.682	0.0404	-2	KCNN1,PLCB4,CAMK1D,PRKCZ
Erythropoietin Signaling	0.674	0.0448		RRAS2,AKT1,PRKCZ
CREB Signaling in Neurons	0.672	0.0355	-2.236	ATF4,RRAS2,AKT1,PLCB4,GNA14,PRKCZ
HIF1α Signaling	0.672	0.04		RRAS2,AKT1,PGF,VEGFB
Synaptic Long Term Depression	0.664	0.037	-2.236	RRAS2,PLCB4,LCAT,GNA14,PRKCZ
Chemokine Signaling	0.661	0.0441		RRAS2,PLCB4,CAMK1D
Notch Signaling	0.661	0.0541		DTX1,LFNG
Renal Cell Carcinoma Signaling	0.649	0.0435		RRAS2,AKT1,UBC
LPS/IL-1 Mediated Inhibition of RXR Function	0.648	0.0337		CHST2,HS3ST3B1,ALDH1L2,PPARA,ALDH18A1,NR5A2,GSTP1
Sertoli Cell-Sertoli Cell Junction Signaling	0.642	0.0347		CLDN10,RRAS2,AKT1,CLDN9,TUBA4A,SPTBN2
Glutaryl-CoA Degradation	0.635	0.0909		GCDH
HGF Signaling	0.632	0.0385	-2	RRAS2,AKT1,CCND1,PRKCZ
Docosahexaenoic Acid (DHA) Signaling	0.627	0.0513		AKT1,CASP9
IL-3 Signaling	0.625	0.0423		RRAS2,AKT1,PRKCZ
Toll-like Receptor Signaling	0.614	0.0417		PPARA,TOLLIP,UBC
NGF Signaling	0.614	0.0377	-2	ATF4,RRAS2,AKT1,PRKCZ
NRF2-mediated Oxidative Stress Response	0.613	0.0339	-2	ATF4,RRAS2,AKT1,GSTP1,PRKCZ,EIF2AK3
Role of PKR in Interferon Induction and Antiviral Response	0.611	0.05		AKT1,CASP9
Neuroprotective Role of THOP1 in Alzheimer's Disease	0.611	0.05		THOP1,MAPT
Regulation of eIF4 and p70S6K Signaling	0.607	0.0352		RRAS2,AKT1,MKNK1,PRKCZ,EIF4EBP1
fMLP Signaling in Neutrophils	0.605	0.0374	-2	RRAS2,NFATC2,PLCB4,PRKCZ
NF-κB Activation by Viruses	0.603	0.0411		RRAS2,AKT1,PRKCZ
Cleavage and Polyadenylation of Pre-mRNA	0.602	0.0833		CPSF4
FcγRIIB Signaling in B Lymphocytes	0.596	0.0488		RRAS2,AKT1
BMP signaling pathway	0.592	0.0405		SOSTDC1,RRAS2,BMP3
Glioblastoma Multiforme Signaling	0.584	0.0345	-2.236	MYC,RRAS2,AKT1,PLCB4,CCND1
Gαq Signaling	0.584	0.0345	-2.236	AKT1,NFATC2,PLCB4,GNA14,PRKCZ
Dermatan Sulfate Biosynthesis (Late Stages)	0.581	0.0476		CHST2,HS3ST3B1
UVC-Induced MAPK Signaling	0.581	0.0476		RRAS2,PRKCZ
mTOR Signaling	0.579	0.033	-2	RRAS2,AKT1,PGF,VEGFB,PRKCZ,EIF4EBP1
Cardiac Hypertrophy Signaling	0.573	0.0318	-2.646	HSPB1,RRAS2,AKT1,PLCB4,GNA14,ATF6,CACNA1A
NAD biosynthesis II (from tryptophan)	0.572	0.0769		NMNAT2
Ubiquinol-10 Biosynthesis (Eukaryotic)	0.572	0.0769		BCKDHB
Superpathway of Inositol Phosphate Compounds	0.566	0.0326		PPP1R14B,PLCB4,SYNJ2,ITPKA,DUSP2,PTPRJ
PDGF Signaling	0.56	0.039		MYC,RRAS2,SYNJ2
Chondroitin Sulfate Biosynthesis (Late Stages)	0.553	0.0455		CHST2,HS3ST3B1
Regulation of IL-2 Expression in Activated and Anergic T Lymphocytes	0.55	0.0385		FYN,RRAS2,NFATC2
Thrombin Signaling	0.547	0.0321	-2.236	RRAS2,AKT1,PLCB4,GNA14,CAMK1D,PRKCZ
CXCR4 Signaling	0.541	0.0331	-2	RRAS2,AKT1,PLCB4,GNA14,PRKCZ
Aldosterone Signaling in Epithelial Cells	0.541	0.0331		HSPB1,CRYAB,PLCB4,PRKCZ,AHCY
Reelin Signaling in Neurons	0.54	0.038		FYN,AKT1,MAPT
Huntington's Disease Signaling	0.538	0.031		ATF4,AKT1,PLCB4,CASP9,GNA14,PRKCZ,UBC
Ceramide Signaling	0.531	0.0375		RRAS2,AKT1,PRKCZ
Breast Cancer Regulation by Stathmin1	0.529	0.0316		RRAS2,PPP1R14B,PLCB4,TUBA4A,CAMK1D,PRKCZ
MSP-RON Signaling Pathway	0.526	0.0435		KLK3,PRKCZ
The Visual Cycle	0.52	0.0667		RDH11
Leukotriene Biosynthesis	0.52	0.0667		GGT1
γ-glutamyl Cycle	0.52	0.0667		GGT1
GPCR-Mediated Nutrient Sensing in Enteroendocrine Cells	0.503	0.0361		PLCB4,GNA14,PRKCZ
Granzyme B Signaling	0.497	0.0625		CASP9
Mismatch Repair in Eukaryotes	0.497	0.0625		SLC19A1
Parkinson's Signaling	0.497	0.0625		CASP9
CNTF Signaling	0.489	0.0408		RRAS2,AKT1
Cell Cycle: G2/M DNA Damage Checkpoint Regulation	0.489	0.0408		RPRM,PRKCZ
ErbB Signaling	0.485	0.0353		RRAS2,AKT1,PRKCZ
HIPPO signaling	0.485	0.0353		PPP1R14B,PRKCZ,TEAD2
FGF Signaling	0.485	0.0353		ATF4,AKT1,FGF21
Amyloid Processing	0.478	0.04		AKT1,MAPT
UVA-Induced MAPK Signaling	0.468	0.0345		RRAS2,PLCB4,CASP9
Molecular Mechanisms of Cancer	0.46	0.0279		MYC,FYN,RRAS2,AKT1,PLCB4,CCND1,CASP9,GNA14,PRKCZ,BMP3
Apoptosis Signaling	0.46	0.0341		RRAS2,HTRA2,CASP9
IL-2 Signaling	0.445	0.0377		RRAS2,AKT1
GADD45 Signaling	0.436	0.0526		CCND1
Tryptophan Degradation III (Eukaryotic)	0.436	0.0526		GCDH
DNA damage-induced 14-3-3σ Signaling	0.436	0.0526		AKT1
Death Receptor Signaling	0.436	0.033		HSPB1,HTRA2,CASP9
Lymphotoxin β Receptor Signaling	0.435	0.037		AKT1,CASP9
Phospholipases	0.435	0.037		PLCB4,LCAT
Regulation of Cellular Mechanics by Calpain Protease	0.425	0.0364		RRAS2,CCND1
Calcium Signaling	0.424	0.0294	-2	TRPV6,ATF4,NFATC2,CAMK1D,CAMKK1
Fcγ Receptor-mediated Phagocytosis in Macrophages and Monocytes	0.421	0.0323		FYN,AKT1,PRKCZ
Salvage Pathways of Pyrimidine Ribonucleotides	0.421	0.0323		UPP2,CDK18,CMPK2
B Cell Receptor Signaling	0.419	0.0292		ATF4,RRAS2,AKT1,NFATC2,SYNJ2
Glioma Invasiveness Signaling	0.406	0.0351		VTN,RRAS2
NAD Salvage Pathway II	0.403	0.0476		NMNAT2
Pyrimidine Deoxyribonucleotides De Novo Biosynthesis I	0.403	0.0476		CMPK2
Telomerase Signaling	0.4	0.0312		MYC,RRAS2,AKT1
T Cell Receptor Signaling	0.4	0.0312		FYN,RRAS2,NFATC2
Calcium-induced T Lymphocyte Apoptosis	0.397	0.0345		NFATC2,PRKCZ
D-myo-inositol-5-phosphate Metabolism	0.394	0.0294		PPP1R14B,PLCB4,DUSP2,PTPRJ
Role of NFAT in Cardiac Hypertrophy	0.393	0.0284	-2.236	RRAS2,AKT1,PLCB4,CAMK1D,PRKCZ
3-phosphoinositide Degradation	0.389	0.0292		PPP1R14B,SYNJ2,DUSP2,PTPRJ
Induction of Apoptosis by HIV1	0.388	0.0339		HTRA2,CASP9
Glucocorticoid Receptor Signaling	0.385	0.0271		BGLAP,PCK2,RRAS2,AKT1,NFATC2,VIPR1,CEBPA
Antiproliferative Role of Somatostatin Receptor 2	0.379	0.0333		RRAS2,SSTR2
Role of PI3K/AKT Signaling in the Pathogenesis of Influenza	0.371	0.0328		AKT1,CASP9
Cholecystokinin/Gastrin-mediated Signaling	0.367	0.0297		RRAS2,PLCB4,PRKCZ
Tumoricidal Function of Hepatic Natural Killer Cells	0.359	0.0417		CASP9
Glycolysis I	0.359	0.0417		ALDOB
Clathrin-mediated Endocytosis Signaling	0.354	0.0272		FGF21,PGF,VEGFB,TFRC,UBC
Rac Signaling	0.354	0.0291		RRAS2,CYFIP2,PRKCZ
Glutathione-mediated Detoxification	0.346	0.04		GSTP1
Gluconeogenesis I	0.346	0.04		ALDOB
Antiproliferative Role of TOB in T Cell Signaling	0.333	0.0385		PABPC4
D-myo-inositol (1,4,5)-Trisphosphate Biosynthesis	0.333	0.0385		PLCB4
IL-15 Signaling	0.332	0.0303		RRAS2,AKT1
Phospholipase C Signaling	0.33	0.026	-2.449	FYN,ATF4,RRAS2,NFATC2,PLCB4,PRKCZ
Sphingosine-1-phosphate Signaling	0.325	0.0278		AKT1,PLCB4,CASP9
Role of NANOG in Mammalian Embryonic Stem Cell Pluripotency	0.319	0.0275		RRAS2,AKT1,BMP3
Melatonin Signaling	0.317	0.0294		PLCB4,PRKCZ
Macropinocytosis Signaling	0.317	0.0294		RRAS2,PRKCZ
Androgen Signaling	0.314	0.0273		CCND1,GNA14,PRKCZ
Growth Hormone Signaling	0.311	0.029		PRKCZ,CEBPA
Basal Cell Carcinoma Signaling	0.311	0.029		DVL3,BMP3
Intrinsic Prothrombin Activation Pathway	0.31	0.0357		KLK3
Integrin Signaling	0.308	0.0256	-1	FYN,RRAS2,AKT1,TSPAN5,ARHGAP26
CCR3 Signaling in Eosinophils	0.298	0.0265		RRAS2,PLCB4,PRKCZ
CD28 Signaling in T Helper Cells	0.298	0.0265		FYN,AKT1,NFATC2
PKCθ Signaling in T Lymphocytes	0.298	0.0265		FYN,RRAS2,NFATC2
PEDF Signaling	0.297	0.0282		RRAS2,AKT1
Type II Diabetes Mellitus Signaling	0.293	0.0263		GCK,AKT1,PRKCZ
IL-17 Signaling	0.291	0.0278		RRAS2,AKT1
JAK/Stat Signaling	0.291	0.0278		RRAS2,AKT1
Hepatic Cholestasis	0.286	0.0253		PPRC1,PPARA,NR5A2,PRKCZ
LPS-stimulated MAPK Signaling	0.285	0.0274		RRAS2,PRKCZ
Leptin Signaling in Obesity	0.285	0.0274		AKT1,PLCB4
STAT3 Pathway	0.285	0.0274		MYC,RRAS2
IL-6 Signaling	0.283	0.0259		HSPB1,RRAS2,AKT1
Cytotoxic T Lymphocyte-mediated Apoptosis of Target Cells	0.28	0.0323		CASP9
G Protein Signaling Mediated by Tubby	0.28	0.0323		PLCB4
D-myo-inositol (1,4,5,6)-Tetrakisphosphate Biosynthesis	0.265	0.025		PPP1R14B,DUSP2,PTPRJ
D-myo-inositol (3,4,5,6)-tetrakisphosphate Biosynthesis	0.265	0.025		PPP1R14B,DUSP2,PTPRJ
Circadian Rhythm Signaling	0.262	0.0303		ATF4
TWEAK Signaling	0.262	0.0303		CASP9
PPARα/RXRα Activation	0.258	0.0242	2	RRAS2,PLCB4,PPARA,GNA14
Oncostatin M Signaling	0.253	0.0294		RRAS2
Stearate Biosynthesis I (Animals)	0.253	0.0294		DBT
Cell Cycle Regulation by BTG Family Proteins	0.245	0.0286		CCND1
Adipogenesis pathway	0.239	0.0238		AKT1,CTNNBIP1,CEBPA
Estrogen Biosynthesis	0.238	0.0278		HSD17B13
Complement System	0.238	0.0278		MASP2
Melanocyte Development and Pigmentation Signaling	0.225	0.0238		ATF4,RRAS2
April Mediated Signaling	0.223	0.0263		NFATC2
B Cell Activating Factor Signaling	0.21	0.025		NFATC2
Mechanisms of Viral Exit from Host Cells	0.203	0.0244		PRKCZ
Role of IL-17F in Allergic Inflammatory Airway Diseases	0.203	0.0244		ATF4

## Sheet: Upstream Regulators UP 2-fold
© 2000-2015 QIAGEN. All rights reserved.
Upstream Regulator	Fold Change	Molecule Type	Predicted Activation State	Activation z-score	Notes	p-value of overlap	Target molecules in dataset	Mechanistic Network
TNF		cytokine	Activated	4.200	bias	3.07E-18	AGT,APOBEC3B,C3,CAT,CCL5,CD44,CDH11,CFB,CFD,COL16A1,COL1A2,CTSS,CXCL16,CXCR4,CYBA,CYBB,EDN1,EGR1,EHD1,EHF,ELF3,FN1,HEXB,HPGD,ICOSLG/LOC102723996,IL4R,IRF1,IRF5,ITGA4,ITGAL,ITGB6,JUN,LAMB3,LGALS3,MARCKSL1,MCM3,MMP2,MUC5AC,NEDD9,NR4A2,OAS2,PIGR,PRSS23,PSMB8,RAB32,RGS2,SEPP1,SLC1A2,SLC8A1,SOAT1,SOX4,SOX9,STAT1,TAP1,TAPBP,TLR3,TNFRSF1B,VCAM1	107 (10)
IFNG		cytokine	Activated	4.913	bias	8.79E-18	AGT,ATF3,BCL2L11,BMF,C1QA,C1QB,C1QC,CAT,CCL5,CIITA,CP,CTSS,CXCL16,CXCR4,CYBB,DDX58,DUOX2,ERBB2,FCER1G,GBP2,HLA-A,HLA-DQB1,HLA-DRA,ICOSLG/LOC102723996,IFIH1,IGFBP4,IRF1,IRF8,JAK3,MARCKSL1,MMP2,NLRC5,OAS2,PIGR,PSMB8,PTN,RTP4,SERPINA5,SOAT1,STAT1,TAP1,TAP2,TCF7L2,TLR3,TNFRSF1B,USP18,VCAM1	111 (12)
TGFB1		growth factor	Activated	4.609	bias	2.01E-14	ACTA2,ADAM19,ALB,ANGPTL4,BCL2L11,BGN,CCL5,CD44,CDH11,CLDN4,COL1A1,COL1A2,COL3A1,COL5A1,CSF1R,CXCR4,EDN1,FBLN1,FN1,FURIN,GLI1,HEXB,ITGA4,JUN,MKI67,MMP2,MRC1,NCAPD2,NEDD9,PIK3CD,SCD,SERPINA3,SFRP1,SMC2,SOX4,SPARC,TGIF1,THBS1,TOP2A,TSPAN7,VIM,ZFP36	80 (10)
TGM2		enzyme	Activated	4.496	bias	5.53E-12	ACSS2,AMICA1,C3,CA2,CD74,CFP,CSRNP1,EHD1,FCER1G,FERMT1,GM2A,ITGAM,LSP1,LY6E,MAFB,MMP2,OAS2,PHLDA1,POR,SAMD9L,SIRPA,SLC25A20,SLC9B2,SLPI,SPP1,STAT1,TAP1,THBS1,TNIP1,TYROBP,XAF1
SMARCA4	1.489	transcription regulator				1.01E-10	AGR2,AGT,AIM1,ARHGDIB,CCR2,CD44,CD74,CIITA,COTL1,CTSH,FBLIM1,FN1,FOSL2,HEXB,HLA-DRA,HPGD,IGFBP4,IRF1,JUN,LGALS3,LUM,MMP2,PLS1,SEPP1,SPP1,THY1
MAPK1		kinase	Inhibited	-3.281		3.17E-09	CCDC82,CCL5,CDK19,CFB,DDX58,EHD1,ERAP1,FN1,HLA-E,IFIH1,ITPR2,LGALS3BP,NT5E,OAS2,PARP12,PLD1,PSMB8,STAT1,TAP1,TLR3,TRIM5,USP18,WIPF1,ZC3HAV1
IL27		cytokine	Activated	3.223	bias	3.93E-09	B2M,CCL5,CD14,CIITA,EMR1,HLA-A,HLA-DQA1,HLA-DRA,HPGD,IRF1,ITGAM,MRC1,STAT1,TAP1	79 (7)
CTNNB1		transcription regulator		1.980	bias	4.69E-09	AIM1,APOD,CD44,CDH11,CNN2,ECM1,EDN1,EPCAM,EPHB3,F13A1,FN1,GPX2,LGALS3,MMP14,MMP2,PLS3,SERPINA3,SERPINA5,SOX9,TSPAN8,VCAN,VIM	22 (2)
ERK1/2		group		0.296	bias	7.80E-09	B2M,CAT,CCL5,CD44,COL3A1,CXCR4,EGR1,HLA-A,HPGD,IGF1R,JUN,MMP2,MUC5AC,PSMB8,PTN,TAP1,TAP2,TAPBP,VCAM1	95 (10)
RELA		transcription regulator	Activated	2.598	bias	2.14E-08	ARHGDIB,B2M,CCL5,CD44,CIITA,COL1A1,CXCR4,EDN1,EHF,ELF3,ERAP1,ERBB2,IRF1,PLD1,SLC1A2,SLC2A5,SOX9,TAP1,TAP2,TAPBP,VCAM1	98 (9)
IL1B		cytokine	Activated	2.038	bias	3.63E-08	AMPD3,BMF,C3,CAT,CCL5,CCR2,CIITA,COL1A1,CTSS,CXCR4,EDN1,EGR1,EHF,ELF3,HEXB,HLA-DRA,IRF1,ITGAM,MUC5AC,NFKBIZ,NR4A2,SERPINA3,TLR3,VCAM1	80 (9)
TCF		group				4.95E-08	AIM1,APOD,CD44,CNN2,ECM1,EPCAM,EPHB3,F13A1,GPX2,LGALS3,MMP2,PLS3,SERPINA3,SERPINA5,TSPAN8
CEBPA		transcription regulator		1.508	bias	1.43E-07	ANPEP,C3,C3AR1,CA2,CSF1R,CSF2RA,CXCR4,EPHX1,ITGAL,ITGAM,KLF5,OAS2,PFN2,PTPRC,RGS2,SERPINF1,SPP1,TBXAS1
STAT1	2.633	transcription regulator				8.99E-07	AGT,CD14,CIITA,DUOX2,FCER1G,IRF1,OAS2,PTN,STAT1,TAP1,TLR3
IRF2		transcription regulator				9.91E-07	B2M,CIITA,ERAP1,PSMB8,PSME1,TAP2,TAPBP	9 (2)
DICER1		enzyme		0.508		1.08E-06	ANGPTL4,ANPEP,CD44,CPEB2,CXCR4,EPCAM,PROS1,SERPINF1,SLC4A4,SPARC,THBS1,VIM
NEUROG1		transcription regulator		-0.577		1.08E-06	C3,CFH,COL3A1,FAM65B,FN1,GAS2,GFPT2,LRIG1,MEST,SERPINF1,THBS1,TSPAN7
AR		ligand-dependent nuclear receptor		1.691	bias	1.33E-06	ARMCX2,AZGP1,CTSO,EGR1,ERBB2,IGF1R,MCM4,PIGR,PLS3,PROS1,STAT1,THBS1,TMPRSS2,VCAN,WEE1,WIPF1
ZNF148		transcription regulator		-0.480	bias	1.58E-06	FN1,ITGAM,STAT1,VIM
NFkB (complex)		complex	Activated	3.405	bias	1.65E-06	C3,CCL5,CD44,CIITA,CLU,CXCR4,DTX3,EDN1,EHF,ELF3,EMR1,ERAP1,ERBB2,IRF1,LSP1,MMP2,NFKBIZ,NUMBL,SLC2A5,SOAT1,TAP1,TNIP1,VCAM1	110 (12)
IL13		cytokine		-0.206	bias	1.81E-06	ATF3,C3,C3AR1,CCL5,CD14,CD37,COL1A2,CXCR4,CYBB,F13A1,GAS7,KCNJ15,MRC1,MUC5AC,PDLIM2,PHLDA1,PID1,SERPINF1,SLA,SLC8A1,THBS1
PRKCD	1.365	kinase	Activated	2.203	bias	2.65E-06	CIITA,COL1A1,COL1A2,GLI1,ITGAM,KLF5,MMP2,MUC5AC,VCAM1
ERBB2	2.281	kinase	Activated	3.606	bias	2.79E-06	ADAM19,ANGPTL4,CDH11,CLDN4,COL1A1,COL5A1,CSF1R,EDN1,ERBB2,FN1,JUN,MKI67,NCAPD2,NEDD9,PIK3CD,SMC2,SOX4,TGIF1,THBS1,TOP2A
SPI1		transcription regulator				3.12E-06	C1QC,CD68,CIITA,CSF2RA,CTSS,CYBB,DUSP6,FES,PSMB8,VAV1
estrogen receptor		group		-1.000		5.10E-06	C3,CAPG,CD44,CD68,CDH11,CLDN4,COL5A1,COL6A1,COL6A2,CXCR4,EDN1,ERBB2,FN1,LY6E,MMP14,NEDD9,NT5E,POR,RGS2,SPARC,VIM
EBI3		cytokine	Activated	2.621	bias	5.23E-06	B2M,CIITA,HLA-A,HLA-DQA1,HLA-DRA,STAT1,TAP1	15 (2)
MITF		transcription regulator		1.970	bias	5.41E-06	ALCAM,CCNG2,CD44,COL1A1,FBXO32,MGP,MMP14,SOX9
TAB1		enzyme	Inhibited	-2.646	bias	7.44E-06	CCL5,CFB,GBP2,IFIH1,JUN,RGS2,XAF1
CNOT7		transcription regulator				9.34E-06	B2M,LGALS3BP,OAS2,PARP12,PSMB8,STAT1,TAP1,TAP2	16 (2)
IRF1	2.054	transcription regulator				1.09E-05	B2M,CIITA,CYBB,ERAP1,PSMB8,PSME1,TAP1,TAP2,TAPBP
PRDM1		transcription regulator	Inhibited	-2.186	bias	1.21E-05	BCL2L11,CIITA,ERAP1,PSMB8,TAPBP
TCF4		transcription regulator				1.42E-05	EDN1,GLI1,JUN,MIA,SOX9,TCF7L2,VCAN
MAP3K7		kinase	Inhibited	-2.646	bias	1.54E-05	CCL5,CFB,GBP2,IFIH1,JUN,MUC5AC,RGS2,XAF1	32 (5)
IL1RN		cytokine	Inhibited	-3.302	bias	2.56E-05	ATF3,CIITA,CTSS,DDX58,HLA-DQB1,IFIH1,IRF1,OAS2,RTP4,TCF7L2,USP18	75 (7)
P38 MAPK		group	Activated	2.297	bias	2.85E-05	ATF3,CCL5,CCNG2,CD44,CD55,COL3A1,DUOX2,EGR1,FN1,JUN,MMP2,MUC5AC,STAT1,TNIP1,TOP2A	119 (13)
WISP2		growth factor	Inhibited	-2.121		3.06E-05	CD44,ERBB2,FN1,JUN,LAMB3,PROCR,SPARC,VIM
Hdac		group	Inhibited	-2.479	bias	3.49E-05	ATF3,CCNG2,CSF1R,CSF2RA,EGR1,ERBB2,FBXO32,JUN,SPP1
TLR3	2.865	transmembrane receptor		1.941	bias	3.55E-05	C3,CCL5,CFB,DDX58,IFIH1,PIK3CD,PIK3R1,PIK3R3,SLPI,STAT1,TLR3,ZC3HAV1	21 (3)
ERN1		kinase				4.65E-05	CYP1B1,EPCAM,ITGB6,OAS2,PROS1,SPARC,SYT11,TMPRSS2
GH1		growth factor		1.387	bias	5.67E-05	ATF3,CAT,EGR1,GHR,ZFP36
PDGF BB		complex	Activated	3.316	bias	7.39E-05	ATF3,CD44,DUSP6,EDN1,EGR1,JUN,NR4A2,PHLDA1,RGS2,THBS1,ZFP36	37 (4)
TCR		complex		1.410	bias	7.64E-05	APOD,BCL2L11,CD200,CXCL13,CXCR4,DDX58,IFIH1,ITGB7,JUN,PIK3CD,PIK3R1,PIK3R3,PTPRC,STAT1,TLR3,ZC3HAV1
ESR1		ligand-dependent nuclear receptor		1.510	bias	9.42E-05	ABCC5,AGT,C1QTNF6,C3,CCNG2,CD55,CYP1B1,EDN1,ERBB2,FOSL2,ICOSLG/LOC102723996,IGF1R,JUN,LEPR,MKI67,MUC5AC,POR,PRSS23,SEMA3B,VIM
ELF3	2.257	transcription regulator		1.188	bias	9.88E-05	EHF,ELF3,ERBB2,LYZ
TREM1		transmembrane receptor	Activated	2.034	bias	1.14E-04	ATF3,ATP1B1,CCL5,CFB,CXCR4,EDN1,EGR1,ELOVL7,IRF1,NEDD4L,NR4A2,NT5E,PHLDA1,PLAC8,PLD1,SPP1,THBS1	63 (6)
SMARCD3		transcription regulator	Activated	2.236	bias	1.25E-04	ALCAM,CD44,COL1A1,MGP,SOX9
T		transcription regulator	Activated	2.236	bias	1.25E-04	ALCAM,CD44,COL1A1,MGP,SOX9
TWIST2		transcription regulator	Activated	2.207	bias	1.25E-04	CD44,FN1,POSTN,VIM,ZEB2
MGEA5	1.535	enzyme	Inhibited	-2.683	bias	1.37E-04	ACSS2,ADAM19,AZGP1,CCNG2,EPHB3,FBLN1,FN1,GLUL,HIPK2,IGFBP4,ITGB7,ITPKB,JUN,LRIG1,MMP14,PROM1,SFRP5,TCF19,THBS1,VIM
ERK		group	Activated	2.750	bias	1.49E-04	BMF,COL1A1,EGR1,JUN,MMP14,MMP2,MUC5AC,PDK4,STAT1,THBS1,ZFP36	49 (5)
IFNA2		cytokine	Activated	3.235	bias	1.66E-04	DDX58,GBP2,IFIH1,IRF1,LGALS3BP,LY6E,OAS2,PARP12,STAT1,USP18,ZC3HAV1	29 (4)
SMC3		other				1.74E-04	HLA-DQA1,HLA-DQB1,HLA-DRA
miR-219a-5p (and other miRNAs w/seed GAUUGUC)		mature microrna				1.74E-04	CD14,PLCG2,TNFRSF1B
SOX11		transcription regulator		0.000	bias	1.74E-04	AS3MT,CCL5,CXCR4,EGR1,IFIH1,ITGA4,NIPSNAP1,STAT1,TIAM1,TP53INP1
SPDEF		transcription regulator	Inhibited	-2.945	bias	1.93E-04	CDH11,COL16A1,COL1A1,COL5A1,COL5A2,COL6A1,COL6A2,SDC2,VIM
IL10		cytokine		1.789		2.21E-04	CCL5,CD14,CD44,CD68,FCGR2B,HPGD,ITGAL,TLR3,TNFRSF1B,VCAN	83 (7)
MAP2K1/2		group		1.765	bias	2.36E-04	ATF3,BCL2L11,C3,EGR1,KLF5,PHLDA1,VIM	10 (2)
USF1		transcription regulator				2.36E-04	AGT,B2M,CCNG2,CIITA,FBXO32,PIGR,SPP1
PRKCA		kinase	Activated	2.415	bias	2.62E-04	ARHGDIB,EGR1,ERBB2,FN1,JUN,MUC5AC,PLD1,VCAM1	50 (8)
DEF6		other		1.996	bias	2.80E-04	FN1,MMP2,VIM,ZEB2
NLRC5	4.152	transcription regulator		1.981	bias	2.80E-04	B2M,HLA-A,HLA-E,TAP1
IDH2		enzyme				2.80E-04	EGR1,FN1,VIM,ZEB2
TNFSF11		cytokine				2.80E-04	CD14,CSF1R,ITGAL,STAT1	13 (2)
STAT3		transcription regulator		1.973	bias	2.92E-04	AGT,DTX3,FN1,IRF1,MMP2,NR4A2,NUMBL,PTN,STAT1,TNFRSF1B,VCAN,VIM,XAF1	20 (2)
SATB1	4.447	transcription regulator		-1.144		3.43E-04	CDK19,CYBB,EPSTI1,FAM65B,HVCN1,IKZF1,IRF8,NR4A2,PIK3IP1,RASGRP2,XAF1
SMAD3		transcription regulator	Activated	2.183	bias	3.50E-04	CCNG2,COL1A2,COL3A1,FBLN1,FN1,GLI1,POR,VIM
HNRNPA2B1		other				3.79E-04	CP,ELOVL7,FN1,HIPK2,LEPR,MEST,PHACTR2,SEMA3B,SFI1,SLC1A2,SRPX,TOX3,VCAN,VIL1
ALB	6.493	transporter				4.24E-04	AGT,ALB,CYBA
IDH1		enzyme				4.27E-04	EGR1,FN1,VIM,ZEB2
BCL6		transcription regulator	Activated	2.621	bias	4.62E-04	ALCAM,BLNK,CD44,CIITA,COL1A1,DUSP6,MGP,SOX9
LGALS3	2.460	other				4.66E-04	COL3A1,COL5A2,CTSH,DUSP6,MGST1,MUC5AC,VCAM1
FOXA1		transcription regulator	Inhibited	-2.345		5.20E-04	AGR2,EPHX1,FSTL1,MGP,PAM,SLPI,SOX9,TF,TRIM2
FOXO1		transcription regulator	Activated	2.449	bias	5.82E-04	APAF1,BCL2L11,CCNG2,EDN1,EGR1,FBXO32,IGF1R,ITGB6,MCM5
RFX5		transcription regulator				6.23E-04	B2M,CD74,COL1A2,HLA-DRA
Akt		group		1.091	bias	6.34E-04	BMF,COL3A1,CXCR4,IGF1R,MMP14,MMP2,VCAM1	60 (7)
EIF2AK2		kinase	Activated	2.813	bias	7.69E-04	DDX58,GABBR1,LGALS3BP,NEDD9,PARP12,STAT1,USP18,ZC3HAV1
IL21		cytokine		1.411	bias	7.69E-04	BCL2L11,CCL5,CXCL13,FCGR2B,MKI67,MMP2,PTPRC,TYROBP
RUNX3		transcription regulator				8.25E-04	BCL2L11,CIITA,ITGAL
LOXL2	1.820	enzyme				8.25E-04	FN1,MMP14,VIM
F10		peptidase				8.25E-04	EGR1,MMP2,VCAM1	44 (5)
DNAJB6		transcription regulator				8.25E-04	AZGP1,SPARC,SPP1
SF1		transcription regulator				8.25E-04	ACTA2,COL1A1,FN1
Mek		group		0.201	bias	9.36E-04	BCL2L11,BMF,DUSP6,EGR1,ERBB2,ETV5,JUN,PDGFRA,PHLDA1,VIM
PAF1		other	Activated	2.646	bias	1.11E-03	CCL5,DDX58,FAM46A,NFKBIZ,OAS2,ZC3HAV1,ZFP36
SP1		transcription regulator				1.12E-03	ATF3,CAT,CIITA,COL1A1,EGR1,FES,FN1,IL2RB,JUN,MMP2,MUC5AC,PROCR,PROM1,PTN,SOX9,SPP1,STAT1,VIM
PDLIM2	2.458	other		0.000		1.22E-03	C4orf19,FSTL1,GHR,LGALS3BP,MECOM,MYL9,PDLIM2,PHLDA1,PHLDA3,SCARA3
IFNL1		cytokine	Activated	2.828	bias	1.22E-03	ATF3,DDX58,IFIH1,LGALS3BP,OAS2,STAT1,USP18,ZC3HAV1
TAC4		other				1.26E-03	MMP14,MMP2	33 (5)
DAB2IP		other				1.26E-03	CLU,EGR1
CALR	1.470	transcription regulator				1.26E-03	COL1A2,FN1
BECN1		other				1.26E-03	BCL2L11,BMF
FOXP1		other				1.26E-03	CSF1R,ITGAM
RFXANK		transcription regulator				1.26E-03	COL1A2,HLA-DRA
TP53		transcription regulator		0.209		1.39E-03	ACTA2,ADRBK2,ANXA4,APAF1,ATF3,BCL2L11,CAT,CHD3,CLU,ELF4,HLA-DQA1,IGF1R,LGALS3,MCM3,MCM4,MCM6,MMP2,PHLDA3,PRKAB2,PROM1,RPS6KA1,SCP2,SHISA5,SMC2,SMC4,TAGLN2,TAP1,TAP2,TCF7L2,TNFRSF1B,TOP2A,VCAN
ETS		group				1.41E-03	C3AR1,HPGD,JAK3
MIA	4.170	other				1.41E-03	FN1,MMP14,SPARC
SMAD1		transcription regulator				1.41E-03	ACTA2,COL1A1,COL1A2
RFXAP		transcription regulator				1.41E-03	COL1A2,HLA-DQA1,HLA-DRA
PDGFRA	2.026	kinase				1.41E-03	ACTA2,COL1A1,PDGFRA
CDX2		transcription regulator				1.55E-03	FUT2,JUN,KLF5,S100G,SOX9,TCF7L2
Pkc(s)		group		1.741	bias	1.79E-03	BCL2L11,HPGD,JUN,MMP2,MUC5AC,RGS2	51 (8)
PGR		ligand-dependent nuclear receptor	Activated	2.425	bias	1.99E-03	ATP1B1,CD44,ERBB2,FN1,GLUL,GSTM3,KLF5,NEDD9,RASSF2,SERPINA5,VCAN	29 (3)
TP63		transcription regulator		-0.421	bias	2.04E-03	APAF1,BCL2L11,COL5A1,FN1,GPX2,ITGA4,L1CAM,POSTN,RAC2,THBS1,VIM,WEE1
EPAS1		transcription regulator				2.10E-03	ANGPTL4,C1QA,CKB,CORO1A,EDN1,ITPR1,L1CAM,SOX9,TMEM45A
IgG		complex		-1.485	bias	2.14E-03	ATP1B1,B2M,CCL5,CLDN4,EDN1,FCGR2B,HLA-E,LGALS3,PLS3,TAPBP,ZFP36
IRF8	3.207	transcription regulator				2.19E-03	B2M,CIITA,CYBB
JAK1		kinase	Activated	2.000	bias	2.60E-03	HLA-A,IRF1,MMP2,STAT1	21 (3)
CTGF		growth factor		1.976	bias	2.60E-03	CD44,FN1,JUN,MMP2
SYVN1		transporter	Activated	3.464	bias	2.65E-03	CD44,CYP1B1,FANCG,HLA-A,IGF1R,L1CAM,LGALS3BP,RAB34,SCARA3,SLC39A10,SLC43A2,ZC3HAV1
RUNX1		transcription regulator				2.78E-03	ALB,CSF1R,MECOM,MYL9,SPP1
RNA polymerase II		complex				2.83E-03	B2M,BLNK,CDH11,CIITA,CXCR4,CYP1B1,ERBB2,FOSL2,L1CAM,MCM3,MMP2
SP3		transcription regulator				2.94E-03	ATF3,COL1A1,COL1A2,EGR1,JUN,MMP2,MUC5AC,PROCR,STAT1
ITGB2		transmembrane receptor				3.20E-03	ITGA4,ITGAL,RAC2
PPP2CA		phosphatase				3.20E-03	BCL2L11,IRF1,ITGAL
S100A4		other				3.20E-03	MMP14,MMP2,VIM	28 (3)
HIF1A		transcription regulator	Activated	2.933	bias	3.23E-03	AGT,ANGPTL4,BGN,CORO1A,CXCR4,FN1,ITPR1,L1CAM,MMP2,PLAC8,PROM1,SOX9,TMEM45A,TMEM79
TP73		transcription regulator	Activated	2.540	bias	3.68E-03	ACTA2,CCNG2,COL5A2,IGFBP4,IL4R,LIG1,PROCR,SHISA5,THBS1,TNFRSF1B,TSPAN1
HTR7		g-protein coupled receptor				3.69E-03	STAB1,THBS1
FGF21		growth factor				3.69E-03	EGR1,HMGCS2
ENTPD5		enzyme				3.69E-03	COL1A1,COL1A2
Ifn		group				3.69E-03	OAS2,STAT1	11 (2)
CYBB	2.488	enzyme				3.69E-03	CYBA,CYBB
MAPK7		kinase				3.69E-03	JUN,VIM
SOCS1		other		-1.980	bias	3.81E-03	DDX58,IFIH1,IRF1,OAS2,TLR3	13 (2)
GAPDH		enzyme	Inhibited	-2.200	bias	3.81E-03	C2,FCER1G,OAS2,SPP1,STAT1
EGR1	6.235	transcription regulator				3.81E-03	ATF3,COL1A2,FN1,HPGD,THBS1
KRAS		enzyme				3.92E-03	DUSP6,ETV5,GLI1,LAMB3,NT5E,PLD1
NR3C1		ligand-dependent nuclear receptor		-0.128	bias	4.19E-03	ANGPTL4,ATP1B1,BCL2L11,BMF,CCL5,CSRNP1,ENC1,FN1,GLUL,IFIH1,IFT122,IGF1R,IRF1,PIK3CD,PIK3R1,PIK3R3,RGS2,SH3KBP1,SLC19A2,SOX4,SPP1,TNFRSF1B,TNFRSF21,VCAM1
IGF1		growth factor		-0.269	bias	4.33E-03	BCL2L11,FN1,IGF1R,PSMB8,TAP1,TAP2,VIM	51 (7)
Rxr		group				4.45E-03	ANGPTL4,FURIN,POR
IFNB1		cytokine	Activated	2.207	bias	5.08E-03	IFIH1,IRF1,OAS2,STAT1,TLR3	12 (2)
FGF2		growth factor		-0.038	bias	5.08E-03	BGN,CXCR4,EGR1,FUT2,VIM
HIC1		transcription regulator		1.134		5.24E-03	ACTA2,CA2,CDO1,CXCL14,ITPR1,SOX9,SPP1
Ap1		complex				5.81E-03	C3AR1,EDN1,HPGD,JUN,SPARC
CHI3L1		enzyme				5.84E-03	CDH11,COL16A1,COL6A1,COL6A2
IFN1@		other				5.96E-03	IRF1,IRF8,TLR3	12 (2)
PIK3R1	3.119	kinase				5.96E-03	PIK3CD,PIK3R1,VCAM1
NOX4		enzyme				5.96E-03	BCL2L11,BMF,MMP2
Creb		group				6.80E-03	CSF1R,EGR1,HPGD,MMP2,NEDD9,RGS2
SREBF1		transcription regulator				6.80E-03	ALOX12,ELOVL7,LGALS3,PLS3,SCD,TF
MDM2		transcription regulator		-1.993	bias	6.94E-03	ELF4,HIPK2,IGF1R,LYZ
YY1		transcription regulator				6.94E-03	CYBB,ERBB2,HLA-DRA,SLC1A2
TEAD		group				7.21E-03	CD44,FN1
Calcineurin protein(s)		complex				7.21E-03	BCL2L11,RGS2
GLIPR2		other				7.21E-03	ACTA2,VIM
FZD8		g-protein coupled receptor				7.21E-03	COL1A1,FN1
HTATIP2		transcription regulator				7.21E-03	MMP2,SPP1
CYP2E1		enzyme				7.21E-03	CAT,MGST1
APLN		other				7.21E-03	CAT,NCF1
mir-148		microrna				7.21E-03	ALCAM,PIK3IP1
mir-7		microrna				7.21E-03	IGF1R,PIK3R3
HAS2		enzyme				7.21E-03	ACTA2,CD44
NFKB1	1.519	transcription regulator				7.46E-03	B2M,CCL5,CIITA,COL1A1,EHF,ELF3,IRF1	52 (5)
PPARG		ligand-dependent nuclear receptor		-0.015	bias	7.52E-03	ACTA2,ANGPTL4,COL1A1,COL1A2,FN1,PLIN2
IL4		cytokine	Activated	2.008	bias	7.61E-03	CD14,CXCR4,FCGR2B,FLT3LG,IL4R,ITGA4,MRC1,PIGR,VCAM1	84 (7)
IL12 (family)		group				7.73E-03	IRF1,IRF8,NFKBIZ
LGALS1		other				7.73E-03	ACTA2,FN1,GLI1
SOX9	4.606	transcription regulator				7.73E-03	GAS7,MIA,TCF7L2
HDAC6		transcription regulator		1.981	bias	8.17E-03	COL1A1,CYP1B1,JUN,VIM
HLX		transcription regulator		-1.000	bias	8.17E-03	CTSS,CYP1B1,EGR1,JUN
MYB		transcription regulator				8.17E-03	CXCR4,FN1,JUN,VIM
SIN3A		transcription regulator				8.17E-03	CCNG2,COL1A2,FBXO32,HLA-DRA
FOXO3		transcription regulator		1.482	bias	8.29E-03	APAF1,BCL2L11,CCNG2,EGR1,FBXO32,VIM
PDX1		transcription regulator				8.46E-03	CD44,PAPSS2,PRSS23,TCF7L2,TSPAN8
MYC		transcription regulator		1.890	bias	8.60E-03	ALCAM,CCNG2,CD44,CLU,COL1A1,FBXO32,JUN,MGP,PROM1,SCPEP1,SOX9,SPP1,USP54
Jnk		group	Activated	2.607	bias	8.80E-03	BCL2L11,EDN1,JUN,MMP14,MMP2,VCAM1,ZFP36	60 (7)
COL18A1	1.812	other		-1.890	bias	8.80E-03	ANTXR1,FN1,JUN,MMP2,STAT1,THBS1,TNFRSF21	35 (4)
CREBBP		transcription regulator				9.50E-03	FGL1,IRF1,NR4A2,RGS2,SLC1A2
TGFB2		growth factor				9.79E-03	EGR1,SCD,VCAN
PTGS2		enzyme		1.987	bias	1.10E-02	CCL5,CD44,EGR1,ERBB2,ITGAL,MMP2
NUPR1		transcription regulator		-1.134	bias	1.15E-02	ABCC5,APOBEC3B,AS3MT,ATF3,CCDC77,CD68,CDCA3,CNPY4,COL1A2,COL3A1,CXCR4,GABBR1,GBP2,IGF1R,IRF2BP2,MKI67,NAAA,NAPEPLD,PHLDA1,PIK3R1,RAB32,SGK223,SLC25A20,ST6GALNAC6,STX3,TMEM194A,TNIP1,ZC3HAV1
HISTONE		group				1.17E-02	CIITA,HPGD
HSP90AA1	1.464	enzyme				1.17E-02	ADRBK2,FN1
FES	7.223	kinase				1.17E-02	ITGA4,ITGAM
mir-130		microrna				1.17E-02	IRF8,MAFB
AKT3		kinase				1.17E-02	BCL2L11,BMF
MAD2L2		enzyme				1.17E-02	EGR1,VIM
ZBTB7B		transcription regulator				1.17E-02	COL1A1,COL1A2
PSMD4		other				1.17E-02	CD14,MARCO
ITGAL	2.944	transmembrane receptor				1.17E-02	ITGA4,ITGAL
PLAA		other				1.17E-02	ANXA4,CLU
CREB1		transcription regulator				1.18E-02	CIITA,FN1,HLA-DRA,NR4A2,RGS2
ID1		transcription regulator				1.21E-02	EGR1,MMP14,VIM
KDM5A	1.387	transcription regulator				1.21E-02	CD55,COL1A2,MCM3
VDR		transcription regulator				1.21E-02	CD14,PDLIM2,UCP2
IGF1R	3.054	transmembrane receptor				1.27E-02	CCL5,IGF1R,ITGAM,PROM1
IL3		cytokine		-0.152	bias	1.45E-02	CD14,CSF1R,FCGR2B,ITGAM
CDH1		other		-1.165		1.45E-02	ERBB2,MMP14,SOX9,VIM
miR-29b-3p (and other miRNAs w/seed AGCACCA)		mature microrna		-1.982	bias	1.45E-02	COL1A2,COL5A2,GAS7,SPARC
IL15		cytokine		1.387	bias	1.46E-02	IL2RG,JUN,PSMB8,TYROBP,ZFP36
IL12 (complex)		complex		1.000	bias	1.46E-02	CD44,IRF1,ITGA4,ITGAL,MMP2
Ifn gamma		complex				1.48E-02	CYBB,IRF8,XAF1
STAT2		transcription regulator				1.48E-02	IRF1,IRF5,OAS2
FGF7		growth factor				1.48E-02	IRF1,SCD,STAT1
CD40		transmembrane receptor	Activated	2.566	bias	1.56E-02	CCL5,FCGR2B,FLT3LG,IRF1,TAP1,TAP2,TAPBP,VCAM1
VIPAS39	1.390	other				1.72E-02	SPARC,THBS1
PURA		transcription regulator				1.72E-02	ITGAL,ITGAM
AGT	3.808	growth factor				1.72E-02	COL1A1,EGR1
TSC22D3	1.899	transcription regulator				1.72E-02	BCL2L11,CCL5
ATG5		other				1.72E-02	BCL2L11,BMF
PML		transcription regulator				1.72E-02	CIITA,HLA-DRA
PRKRA		other				1.72E-02	PROS1,THBS1
FGFR2		kinase				1.72E-02	COL1A1,SPP1
MCAM		other				1.72E-02	FN1,VIM
TARBP2		other				1.72E-02	PROS1,THBS1
PBX1	1.580	transcription regulator				1.72E-02	TCF7L2,VCP
GATA4		transcription regulator		-1.980	bias	1.76E-02	COL1A1,COL1A2,COL3A1,ECM2,EPHX1
ITGAV		ion channel				1.77E-02	COL1A1,COL1A2,MMP2
SPP1	43.186	cytokine				1.77E-02	BCL2L11,CD44,MMP2
ELF4	2.331	transcription regulator				1.77E-02	CA2,CREM,PIK3C3
ATF2		transcription regulator				1.77E-02	ATF3,FN1,JUN
GLI1	2.718	transcription regulator	Activated	2.795	bias	1.87E-02	COL1A1,MEST,MMP2,PAPSS2,RGS10,RPS6KA1,SPP1,TMEM79
TLR4		transmembrane receptor		1.944	bias	1.93E-02	ATF3,C3,CCL5,MUC5AC,VCAM1
NCR2		transmembrane receptor				2.10E-02	NR4A2,THBS1,TYROBP
HGF		growth factor		0.011	bias	2.10E-02	CCL5,CCNG2,EGR1,ELF3,MMP2,TAGLN2,THBS1,VCAM1
JUN	3.229	transcription regulator		1.054	bias	2.22E-02	ALOX12,C3AR1,HPGD,JUN,MMP2,NFKBIZ,SULF2,ZFP36
GATA1		transcription regulator				2.32E-02	BCL2L11,CCL5,LEPR,MECOM
NRXN1		transporter				2.32E-02	FBLN5,MGP,SOX9,THBS1
WWTR1	1.768	transcription regulator				2.35E-02	CD44,FN1
PCM1	1.973	other				2.35E-02	MCM3,MKI67
ICAM1		transmembrane receptor				2.35E-02	ITGA4,ITGAL
C3AR1	3.094	g-protein coupled receptor				2.35E-02	C3,CD55
DYRK1B	2.149	kinase				2.35E-02	CP,SOD3
mir-19		microrna				2.35E-02	BCL2L11,RAB13
mir-181		microrna				2.35E-02	BCL2L11,IRF8
GPI		enzyme				2.35E-02	FN1,VIM
ATG7		enzyme				2.35E-02	BCL2L11,BMF
THY1	3.702	other				2.35E-02	MMP2,VIM
ELANE		peptidase				2.35E-02	MMP2,MUC5AC
ADRB2		g-protein coupled receptor				2.35E-02	ATP1B1,CYP1B1
HDAC1		transcription regulator				2.41E-02	CD44,COL1A2,CSF1R,RGS10,SPP1,TOP2A
SNAI1		transcription regulator				2.45E-02	CD55,HPGD,SPARC
CD24		other	Activated	2.000	bias	2.47E-02	APOBEC3B,ATF3,ECM1,SLC4A4,SMC4,THBS1,TOP2A,TRIM2
CLDN7	1.410	other	Activated	2.646		2.50E-02	AGT,ARHGDIB,CD68,LGALS3,MMP2,PQLC3,TPK1
CSF2		cytokine	Activated	2.646	bias	2.50E-02	CIITA,CYBB,DUSP6,FAM65B,FCGR2B,IRF5,ITGA4
Growth hormone		group		1.400	bias	2.72E-02	ANGPTL4,FOSL2,NEDD9,PDK4,ZEB2
CDK9		kinase				2.83E-02	CCL5,CXCR4,PDK4
CCL2		cytokine				2.83E-02	FOLR2,MMP2,NCF1
MMP2	2.335	peptidase				2.83E-02	CD44,IL2RG,IL4R
SIN3B		transcription regulator				2.83E-02	CCNG2,COL1A2,FBXO32
TNFSF10		cytokine				2.83E-02	CD14,ITGAM,JUN
IFN Beta		group				2.86E-02	CD74,FN1,OAS2,STAT1
MAP2K1		kinase				2.86E-02	ATF3,BCL2L11,DUSP6,LGALS3
KDM5B		transcription regulator	Inhibited	-2.091	bias	2.89E-02	CDCA3,EHD1,LGALS3BP,MCM3,NEDD9,PLS3,SOX9,TOP2A
EGF		growth factor		1.347	bias	2.94E-02	DUSP6,EGR1,FUT2,MUC5AC,S100A10
IRF4		transcription regulator				2.94E-02	B2M,CIITA,IRF1,SPP1,STAT1
MYOC		other				2.96E-02	CA2,CD44,CDH11,FN1,SFRP1,TGIF1
ETS1		transcription regulator				2.96E-02	ARHGDIB,CCDC90B,CD44,FN1,NCF1,TBXAS1
HNF1A		transcription regulator				3.00E-02	ABCC2,ALB,ANPEP,CPQ,ELF3,FGL1,GCNT3,GMDS,PAFAH2
E2F1		transcription regulator				3.02E-02	APAF1,BCL2L11,MCM3,MCM5,MCM6,PPP1R3A,RRM1,SMC4,THBS1,TOP2A,TP53INP1
ADCY		group				3.06E-02	COL3A1,CYP1B1
MEMO1		other				3.06E-02	CA2,JUN
ELF1	1.597	transcription regulator				3.06E-02	FCER1G,FES
RETN		other				3.06E-02	EDN1,VCAM1
BCL3		transcription regulator				3.06E-02	AGT,IRF1
NLRP12		other				3.06E-02	CXCL13,CXCR4
NCAM1		other				3.06E-02	NLGN2,THBS1
SCUBE3		other				3.06E-02	MMP2,VIM
SMURF2		enzyme				3.06E-02	FN1,TGIF1
SBDS		other				3.15E-02	COL14A1,COL27A1,EGR1,FBXO32,IL4R,MAFB,SPP1
SMAD4		transcription regulator				3.15E-02	AGR2,CCNG2,ITGB7,POR,PTPRC,SHISA5,THBS1
NEDD9	2.529	other	Activated	2.000	bias	3.15E-02	ELF3,ERRFI1,PLAC8,PLIN2
FANCC		other				3.18E-02	ATP1B1,MYRF,PTPRC,SNX7,UGT2B7
KLF4		transcription regulator				3.25E-02	ALCAM,PROM1,VIM
SRC		kinase				3.25E-02	IGF1R,MMP2,VCAM1
FOSL1		transcription regulator				3.25E-02	HPGD,MMP2,SPARC
RAD21		other				3.25E-02	HLA-DQA1,HLA-DQB1,HLA-DRA
EHF	4.642	transcription regulator		0.000	bias	3.36E-02	ANGPTL4,ANPEP,BLNK,EHF,SERPINA3,THY1
ETV5	2.200	transcription regulator				3.46E-02	ALCAM,CLDN4,FN1,MMP2
IL6		cytokine		0.670	bias	3.52E-02	AGT,ALB,C3,CLU,MMP2,SERPINA3,THBS1,VCAM1
ALG10		enzyme				3.55E-02	PROM1
CTSV		peptidase				3.55E-02	PENK
SHP		group				3.55E-02	EGR1
p70 S6k		group				3.55E-02	ICOSLG/LOC102723996
ITPR		group				3.55E-02	CYP1B1
tyrosine kinase		group				3.55E-02	CD44
Calmodulin		group				3.55E-02	KLF5
Ck2		complex				3.55E-02	ZFP36
cAMP-Gef		group				3.55E-02	CYP1B1
Adaptor protein 2		complex				3.55E-02	PIGR
thyroid hormone receptor		group				3.55E-02	POR
ASB9		transcription regulator				3.55E-02	CKB
MOGS		enzyme				3.55E-02	PROM1
ALG8		enzyme				3.55E-02	PROM1
PRMT6		enzyme				3.55E-02	THBS1
ALG6		enzyme				3.55E-02	PROM1
GLIS3	3.088	transcription regulator				3.55E-02	BCL2L11
ALG5		enzyme				3.55E-02	PROM1
CMKLR1	1.912	g-protein coupled receptor				3.55E-02	CD55
KDM4B		other				3.55E-02	VIM
S100A14		other				3.55E-02	MMP2
G protein		complex				3.55E-02	CYP1B1
MGAT4C		enzyme				3.55E-02	PROM1
Mannosidase2		group				3.55E-02	PROM1
TNFRSF10A		transmembrane receptor				3.55E-02	CD14
FAF1		other				3.55E-02	VIM
CGB (includes others)		other				3.55E-02	MMP2
LIMS1		other				3.55E-02	BCL2L11
CSNK2A1		kinase				3.55E-02	ZFP36
ACPP		phosphatase				3.55E-02	ERBB2
TJP1	1.474	other				3.55E-02	MMP14
PRPF4		other				3.55E-02	CCL5
miR-18a-5p (and other miRNAs w/seed AAGGUGC)		mature microrna				3.55E-02	THBS1
miR-196a-5p (and other miRNAs w/seed AGGUAGU)		mature microrna				3.55E-02	COL1A1
mir-196		microrna				3.55E-02	COL1A1
mir-493		microrna				3.55E-02	IGF1R
ADCYAP1		other				3.55E-02	ITGAM
ABHD5		enzyme				3.55E-02	PDK4
CDC14A		phosphatase				3.55E-02	WEE1
CDC7		kinase				3.55E-02	MCM4
FALEC		other				3.55E-02	ECM1
COL4A3		other				3.55E-02	MMP14
ACOT8		enzyme				3.55E-02	CAT
ODC1		enzyme				3.55E-02	ITGAL
ITGB4		transmembrane receptor				3.55E-02	SPARC
WWP1	2.630	enzyme				3.55E-02	KLF5
SLC2A1		transporter				3.55E-02	MMP2
RYK		kinase				3.55E-02	FN1
PPAP2B		phosphatase				3.55E-02	FN1
AGTR1		g-protein coupled receptor				3.55E-02	CYBA
DDOST		enzyme				3.55E-02	PROM1
SNCG		other				3.55E-02	IGF1R
ZBTB32		transcription regulator				3.55E-02	CIITA
DMTF1		transcription regulator				3.55E-02	ANPEP
COMP		other				3.55E-02	LGALS3
USP13		peptidase				3.55E-02	STAT1
EEF2K		kinase				3.55E-02	KLF5
CAPNS1		peptidase				3.55E-02	MMP2
GPBP1		transcription regulator				3.55E-02	TOP2A
RACGAP1		transporter				3.55E-02	CD14
TFF3		other				3.55E-02	CD55
PA2G4		transcription regulator				3.55E-02	AGR2
SRRM1		other				3.55E-02	CD44
BRMS1	2.277	other				3.55E-02	CXCR4
CDC42		enzyme				3.55E-02	ATF3
EWSR1		other				3.55E-02	ERBB2
GSTT1		enzyme				3.55E-02	GSTM3
PRR13		other				3.55E-02	THBS1
IL33	2.490	cytokine				3.69E-02	ITGAM,LEPR,PLIN2
CSF1		cytokine				3.69E-02	FN1,STAT1,TNFRSF1B
SMAD2		transcription regulator				3.69E-02	ACTA2,BCL2L11,CCNG2
POU2F1		transcription regulator				3.69E-02	HLA-DRA,SPP1,TMPRSS2
FOXA2		transcription regulator				3.69E-02	AGR2,EPHX1,PROS1
HAND2		transcription regulator		-1.980	bias	3.79E-02	COL1A1,COL1A2,COL3A1,ECM2
TBX5		transcription regulator		-1.980	bias	3.79E-02	COL1A1,COL1A2,COL3A1,ECM2
PPARA		ligand-dependent nuclear receptor				3.79E-02	ACSS2,C3,HMGCS2,PLIN2
Tgf beta		group				3.85E-02	COL1A1,COL1A2
WWC1		transcription regulator				3.85E-02	RASSF4,VIM
RLIM		enzyme				3.85E-02	FN1,VIM
let-7a-5p (and other miRNAs w/seed GAGGUAG)		mature microrna				3.85E-02	ACTA2,VIM
UBE3A		enzyme				3.85E-02	SOX9,TP53INP1
MNT		transcription regulator				3.85E-02	CCNG2,FBXO32
CBL		transcription regulator				3.85E-02	COL1A1,PDGFRA
MAPK9		kinase		0.447		3.95E-02	LGALS3BP,LSM3,MARCKSL1,PLIN2,SCD
mir-155		microrna				4.16E-02	IRF8,TP53INP1,WEE1
USF2		transcription regulator				4.16E-02	AGT,B2M,PIGR
BMP7		growth factor				4.16E-02	ACTA2,IGF1R,IGFBP4
HMGB1		transcription regulator				4.16E-02	FGL1,MRC1,VCAM1
LRP6		transmembrane receptor				4.70E-02	ACTA2,EPCAM
MTA3		other				4.70E-02	BLNK,CIITA
PTGER4		g-protein coupled receptor				4.70E-02	CD44,EGR1
CLCA2		ion channel				4.70E-02	FN1,VIM
PRKAR1A		kinase				4.70E-02	ERBB2,NR4A2
KDM1A		enzyme				4.70E-02	SFRP1,SFRP5
TGFBR1		kinase				4.70E-02	EDN1,VIM
ITGB3		transmembrane receptor				4.70E-02	COL1A1,MMP2
ADAM15	1.693	peptidase				4.70E-02	CCL5,CD44
BCR (complex)		complex				4.83E-02	CD44,CXCR4,GBP2,IL2RB,ITGA4

## Sheet: Upstream Regulators DOWN 2-fold
© 2000-2015 QIAGEN. All rights reserved.
Upstream Regulator	Fold Change	Molecule Type	Predicted Activation State	Activation z-score	Notes	p-value of overlap	Target molecules in dataset	Mechanistic Network
TRIB3		kinase	Activated	2.236	bias	1.34E-05	CTH,PCK2,PSAT1,PSPH,STC2
BRD4		kinase	Inhibited	-2.828	bias	5.98E-05	CCND1,DERL3,FKBP11,MYC,RRS1,SLC19A1,SLC7A2,SRM
Hedgehog		group				2.09E-04	CCND1,KLK3,MYC
LGALS3		other				2.39E-04	CCND1,CTSV,NFATC2,PRKCZ,PRSS1,PRSS3
ESR1		ligand-dependent nuclear receptor		-1.490	bias	3.67E-04	ADORA1,BCL2L2,CCND1,CEBPA,GJB1,GJB2,KLK3,MYC,PDCD4,RPRM,SLC7A2,SLC7A5,STC2,TMEM97
RPRD1B		other				4.96E-04	CCND1,MYC
PXN		other				4.96E-04	CCND1,KLK3
MEMO1		other				5.66E-04	CCND1,MYC,STC2
A2M		transporter	Inhibited	-2.000	bias	5.81E-04	ATF4,ATF6,CCND1,EIF2AK3
SYVN1		transporter	Inhibited	-3.162	bias	7.60E-04	AMOTL2,CCND1,HSPB1,PTPRJ,SLC35C2,SLC3A2,SLC7A2,SLC7A5,SLCO4A1,TFRC
ATF4	-2.010	transcription regulator		-1.951	bias	8.88E-04	PCK2,PHGDH,PSAT1,PSPH
ZMIZ2		transcription regulator				1.46E-03	CCND1,MYC
ATAD2		enzyme				1.46E-03	CCND1,MYC
MYC	-3.258	transcription regulator		-1.667	bias	1.70E-03	ALDH18A1,ATP13A2,CYFIP2,HSPB1,LOC102724788/PRODH,MYC,ODC1,PDCD4,PDK1,PYCR1,SHMT2
KIAA1524		other		1.633	bias	1.97E-03	CRLF1,CRYAB,LRP4,LXN,PDE2A,TUBA4A
SNRK		kinase				2.89E-03	CCND1,MYC
RBCK1		transcription regulator				2.89E-03	CCND1,MYC
HNRNPA1		other				2.89E-03	KLK3,MYC
MYOC		other				3.48E-03	EIF2AK3,PRSS3,RHBDF1,SLC7A11,SOSTDC1,STC2
PKM		kinase				4.74E-03	CCND1,MYC
ELK1		transcription regulator				4.96E-03	NUPR1,SLC7A11,TPD52L1
IRF2		transcription regulator				5.92E-03	CCND1,CEACAM1,PSMB10
ACSL5		enzyme				5.92E-03	FKBP11,MAP2,PPP4R4
ESR2		ligand-dependent nuclear receptor				5.97E-03	CCND1,GSTP1,KLK3,MYC
PLSCR1		enzyme				7.00E-03	CCND1,MYC
RUNX3		transcription regulator				7.00E-03	AKT1,CCND1
PRKCZ	-2.010	kinase				7.00E-03	PHGDH,PSAT1
CSF1R		kinase				7.00E-03	CCND1,MYC
DDX17		enzyme				7.00E-03	CCND1,MYC
SMO		g-protein coupled receptor				7.00E-03	KLK3,MYC
USF1		transcription regulator				8.16E-03	CBS/LOC102724560,CEACAM1,CEBPA,SLC19A1
CD28		transmembrane receptor	Activated	2.190	bias	8.89E-03	FYN,HOMER2,ORAI2,PDE4A,SLC7A5,TFRC
CLDN7		other		0.816		9.43E-03	PHGDH,RRAS2,SERP1,SERPINB1,SLC25A22,TEAD2
SRC		kinase				9.45E-03	AKT1,CCND1,MYC
Alpha catenin		group				9.66E-03	KLK3,MYC
FBXW7	-1.784	transcription regulator				9.66E-03	DTX1,MYC
STAT5B		transcription regulator				9.66E-03	CCND1,MYC
CDK8		kinase				9.66E-03	CTNNBIP1,MYC
RNF31		enzyme				1.08E-02	ADORA1,CCND1,NR5A2
Mek		group	Inhibited	-2.443	bias	1.25E-02	CCND1,GNL3,LYAR,MYC,PUS7,SLC16A6
miR-451a (and other miRNAs w/seed AACCGUU)		mature microrna				1.27E-02	AKT1,CCND1
UGT2B17		enzyme				1.27E-02	KLK3,SLC16A6
DDX5		enzyme				1.27E-02	CCND1,MYC
UGT2B15		enzyme				1.27E-02	KLK3,SLC16A6
SIN3A		transcription regulator				1.40E-02	GSTP1,KLK3,MYC
PRKCE		kinase				1.57E-02	CCND1,MYC,PDCD4
STAT3		transcription regulator		-1.455	bias	1.66E-02	AKT1,CCND1,CEACAM1,DVL3,MYC,NFATC2,STC2
Gsk3		group				1.76E-02	ATF4,CCND1,MYC
GLI1		transcription regulator	Inhibited	-2.213	bias	1.86E-02	AKT1,CCND1,CMPK2,EPB41L4B,GALNT2,KLK3
RBL2		other				1.95E-02	CCND1,MYC,VEGFB
N-cor		group				1.98E-02	CCND1,GSTP1
NCL		other				1.98E-02	MYC,PDCD4
IGFBP5		other				1.98E-02	BGLAP,CCND1
GLI2		transcription regulator				1.98E-02	KLK3,MYC
SERPINF1		other				1.98E-02	CCND1,MYC
EIF4E		translation regulator				1.98E-02	CCND1,CEBPA
CHD4		enzyme				1.98E-02	ADORA1,NCEH1
RBL1		transcription regulator				2.16E-02	CCND1,MYC,VEGFB
Cofilin		group				2.23E-02	MYC
eIF2B		complex				2.23E-02	ATF4
MNK1/2		group				2.23E-02	MYC
FKHR		group				2.23E-02	CCND1
RPL21		other				2.23E-02	MYC
ZMIZ1		other				2.23E-02	MYC
EIF2A		translation regulator				2.23E-02	PCK2
SSBP2		transcription regulator				2.23E-02	MYC
CALCOCO1		transcription regulator				2.23E-02	CCND1
VENTX		transcription regulator				2.23E-02	CCND1
FLT4		transmembrane receptor				2.23E-02	BGLAP
PLAC1		other				2.23E-02	CCND1
GLIPR1		other				2.23E-02	MYC
ITGB5		other				2.23E-02	VTN
PTRF		transcription regulator				2.23E-02	MYC
PRKACB		kinase				2.23E-02	MYC
BAD		other				2.23E-02	CCND1
CTNNBIP1	-2.185	other				2.23E-02	KLK3
CDC45		other				2.23E-02	MYC
SLC20A1	-1.575	transporter				2.23E-02	AKT1
miR-185-3p (and other miRNAs w/seed GGGGCUG)		mature microrna				2.23E-02	MYC
miR-23a-5p (and other miRNAs w/seed GGGUUCC)		mature microrna				2.23E-02	LOC102724788/PRODH
RPS14		translation regulator				2.23E-02	MYC
SNIP1	-1.588	other				2.23E-02	CCND1
KLF10		transcription regulator				2.23E-02	BGLAP
RNF14		transcription regulator				2.23E-02	KLK3
NCOA5		other				2.23E-02	MYC
HOXB13		transcription regulator				2.23E-02	CCND1
MED26		transcription regulator				2.23E-02	MYC
CXCL2		cytokine				2.23E-02	IFRD1
TDG		enzyme				2.23E-02	MYC
GTF2I		transcription regulator				2.23E-02	MYC
VCAM1		transmembrane receptor				2.23E-02	CCND1
CXCR2		g-protein coupled receptor				2.23E-02	IFRD1
DYRK1A		kinase				2.23E-02	CCND1
ERF	-1.750	transcription regulator				2.23E-02	MYC
RPS20		other				2.23E-02	MYC
EEF1A1		translation regulator				2.23E-02	MYC
CDK11B		kinase				2.23E-02	KLK3
TOP2A		enzyme				2.23E-02	MYC
KRT10		other				2.23E-02	CCND1
MYH9		enzyme				2.23E-02	MYC
KAT5		transcription regulator		-1.000	bias	2.34E-02	CCND1,KLK3,MAPT,MYC,PSMD6
AHR		ligand-dependent nuclear receptor				2.38E-02	ABCB6,CCND1,MYC
FABP2		transporter				2.39E-02	ACACB,PPARA
miR-122-5p (miRNAs w/seed GGAGUGU)		mature microrna	Activated	2.000	bias	2.67E-02	DUSP2,P4HB,SLC7A1,SLC7A11
MXI1		transcription regulator				2.82E-02	SLC1A4,SLC7A1
HSPA5		enzyme				2.82E-02	BCL2L2,EIF2AK3
E2F1		transcription regulator				2.90E-02	CCND1,CTNNBIP1,MYC,PRPSAP1,PSAT1,SLC3A2,SOX7,VEGFB
TERT		enzyme				3.38E-02	CCND1,KLK3,MYC
ERK1/2		group		0.254	bias	3.39E-02	CCND1,CEBPA,CLEC11A,MKNK1,MYC,PSMB10
AR		ligand-dependent nuclear receptor	Inhibited	-2.142	bias	3.39E-02	EPB41L4B,KLK3,MYC,NUPR1,SLC7A11,TPD52L1
Ap1		complex				3.66E-02	BGLAP,CCND1,MYC
miR-16-5p (and other miRNAs w/seed AGCAGCA)		mature microrna				3.78E-02	BCL2L2,CCND1
KDM5A		transcription regulator				3.78E-02	CCND1,DUSP2
CARM1		transcription regulator				3.78E-02	MYC,SPINK1
AZGP1		transporter				3.78E-02	CCND1,MYC
BCL11B		other				3.78E-02	ADORA1,NCEH1
EGFR		kinase		-1.109	bias	3.81E-02	AKT1,CCND1,KLK3,MYC
HIF1A		transcription regulator	Inhibited	-2.219	bias	3.81E-02	CCND1,EMC9,MYC,NDRG1,PDK1,PPARA,STC2,TFRC
EP300		transcription regulator				4.02E-02	CCND1,CEBPA,KLK3,MYC
mir-21		microrna				4.30E-02	PDCD4,PPARA
CXCR4		g-protein coupled receptor				4.30E-02	CCND1,MYC
RAC1		enzyme				4.30E-02	CCND1,MYC
PSMD10		transcription regulator				4.30E-02	CCND1,EIF4EBP1
VTCN1		other				4.41E-02	CCND1
ISX		other				4.41E-02	CCND1
AFF4		transcription regulator				4.41E-02	MYC
KDM4C		other				4.41E-02	KLK3
TCF/LEF		group				4.41E-02	CCND1
BCAS3		other				4.41E-02	MYC
NDUFAB1		enzyme				4.41E-02	DBT
GPBAR1		g-protein coupled receptor				4.41E-02	CCND1
EIF4F		complex				4.41E-02	MYC
PECAM1		other				4.41E-02	CCND1
GLRX3		enzyme				4.41E-02	TFRC
DNAJC3	-1.528	other				4.41E-02	ATF4
FGFR4		kinase				4.41E-02	CCND1
EIF4EBP1	-4.052	translation regulator				4.41E-02	CCND1
AIRE		transcription regulator				4.41E-02	KLK3
PMEPA1		other				4.41E-02	KLK3
ALOX5		enzyme				4.41E-02	ATF4
ENO1		enzyme				4.41E-02	MYC
miR-183-5p (miRNAs w/seed AUGGCAC)		mature microrna				4.41E-02	PDCD4
miR-193a-3p (and other miRNAs w/seed ACUGGCC)		mature microrna				4.41E-02	CCND1
mir-23		microrna				4.41E-02	LOC102724788/PRODH
miR-375-3p (and other miRNAs w/seed UUGUUCG)		mature microrna				4.41E-02	MYC
NUBP1		other				4.41E-02	TFRC
MTBP		other				4.41E-02	ODC1
NOS3		enzyme				4.41E-02	GSTP1
NCK1		kinase				4.41E-02	ATF4
LIMK1		kinase				4.41E-02	MYC
RPL15		other				4.41E-02	MYC
FTL	-1.621	enzyme				4.41E-02	TFRC
HDAC7		transcription regulator				4.41E-02	RPRM
P2RY2		g-protein coupled receptor				4.41E-02	VTN
KHDRBS1		transcription regulator				4.41E-02	CCND1
GUCY1A3		enzyme				4.41E-02	PCBP4
RBP3		transporter				4.41E-02	ATF4
RFX3		transcription regulator				4.41E-02	GCK
DACH1		transcription regulator				4.41E-02	KLK3
FIGF		growth factor				4.41E-02	BGLAP
RPA2		other				4.41E-02	MYC
PIWIL2		other				4.41E-02	CCND1
NF1		other				4.41E-02	CBS/LOC102724560
MAML1		transcription regulator				4.41E-02	CCND1
CDC27		other				4.41E-02	CCND1
FTH1		enzyme				4.41E-02	TFRC
PRKACA	-1.416	kinase				4.41E-02	MYC
PCYT1A		enzyme				4.41E-02	MAT1A
FAM103A1		other				4.41E-02	MYC
RPLP2		other				4.41E-02	PDCD4
HIC1		transcription regulator		0.000		4.47E-02	CCND1,KAZN,SLC7A11,TNFAIP8
NFkB (complex)		complex		-1.172	bias	4.52E-02	BCL2L2,CASP9,CCND1,DVL3,MYC,PPARA,RRAS2,SLC7A5,TNFAIP8
CEBPA	-2.553	transcription regulator		1.342	bias	4.55E-02	CEBPA,GAL,GCH1,MYC,NFATC2,SERPINB1
MAP2K1/2		group				4.56E-02	CCND1,MYC,PPARA
PDX1		transcription regulator				4.56E-02	ERO1LB,NR5A2,PHGDH
PRL		cytokine				4.84E-02	CCND1,MYC
IKBKE		kinase				4.84E-02	CCND1,MYC
FN1		enzyme				4.84E-02	CCND1,MYC

## Sheet: Pathways Comparison 2-fold
© 2000-2015 QIAGEN. All rights reserved.
Canonical Pathway	DE_Ptf1a_cKO 2wk-3KO_edgeR 01-08-2015 UP - 2015-01-25 08:11 PM	Downreg genes 012015 - 2015-01-25 08:23 PM
Antigen Presentation Pathway	10.4181523648164
Dendritic Cell Maturation	10.1755887249675	-0.0
Complement System	9.4173507038278	0.23763776010556398
iCOS-iCOSL Signaling in T Helper Cells	9.49728270747708	-0.0
PI3K Signaling in B Lymphocytes	5.9425857436343	2.57797004670139
Hepatic Fibrosis / Hepatic Stellate Cell Activation	8.01790073989211	-0.0
Production of Nitric Oxide and Reactive Oxygen Species in Macrophages	7.59196778030235	-0.0
Leukocyte Extravasation Signaling	7.54153543210321	-0.0
Virus Entry via Endocytic Pathways	6.58592739877695	0.794371319782421
UVA-Induced MAPK Signaling	6.72795333115263	0.468311459157858
Superpathway of Serine and Glycine Biosynthesis I		6.83145718159592
CD28 Signaling in T Helper Cells	6.50209979870318	0.29812086033806895
PKCθ Signaling in T Lymphocytes	6.50209979870318	0.29812086033806895
IL-4 Signaling	5.41713554492676	1.02252159401309
Role of JAK1 and JAK3 in γc Cytokine Signaling	6.43927314548749	-0.0
Macropinocytosis Signaling	5.77944658121302	0.317484889494687
LXR/RXR Activation	6.04933910816483	-0.0
Role of NFAT in Regulation of the Immune Response	5.18769860315196	0.695106797091387
Serine Biosynthesis		5.81654027977627
Role of Pattern Recognition Receptors in Recognition of Bacteria and Viruses	5.4997957071215	-0.0
Integrin Signaling	5.17369397215354	0.307503722774031
Axonal Guidance Signaling	3.57233122658242	1.87356459318891
Unfolded protein response	-0.0	5.41895401828348
IL-9 Signaling	5.40184176513893
FcγRIIB Signaling in B Lymphocytes	4.68217255169635	0.59587205280116
Acute Myeloid Leukemia Signaling	3.18304501196735	2.03340671726358
Acute Phase Response Signaling	5.10859185404605	-0.0
Endothelin-1 Signaling	4.08329742104806	0.988096708961545
IL-2 Signaling	4.52685967803627	0.445314959348538
ErbB2-ErbB3 Signaling	3.57140234608394	1.36158446307824
NRF2-mediated Oxidative Stress Response	4.25242118901223	0.613295548529126
Atherosclerosis Signaling	4.82313625012394	-0.0
MSP-RON Signaling Pathway	4.25947284634805	0.526211465016894
Myc Mediated Apoptosis Signaling	2.78443440647511	1.92258188214008
Fcγ Receptor-mediated Phagocytosis in Macrophages and Monocytes	4.24618973969695	0.421328376281416
HER-2 Signaling in Breast Cancer	3.18304501196735	1.46545260433956
Docosahexaenoic Acid (DHA) Signaling	3.99838477981721	0.627175644954159
Endometrial Cancer Signaling	2.43796366412781	2.11897060137174
Growth Hormone Signaling	4.20903890465261	0.310617156926509
ERK/MAPK Signaling	2.63105970599977	1.87163951892175
FXR/RXR Activation	2.96432807793019	1.53193207720381
Thrombopoietin Signaling	3.63259077876908	0.849475524694912
Role of Macrophages, Fibroblasts and Endothelial Cells in Rheumatoid Arthritis	2.40791976613584	2.05486077633194
Estrogen-Dependent Breast Cancer Signaling	2.59644868339486	1.8058149866121
Prolactin Signaling	3.32455386008861	1.02252159401309
PDGF Signaling	3.76642922993247	0.560269006185258
EGF Signaling	4.31062225995828	-0.0
Phenylalanine Degradation I (Aerobic)		4.28465481492545
Leptin Signaling in Obesity	3.9794370766561	0.2847884898169579
Non-Small Cell Lung Cancer Signaling	3.07996575151921	1.16653727836871
Reelin Signaling in Neurons	3.66556895009563	0.540339647827136
Renin-Angiotensin Signaling	4.15843243620642	-0.0
Granulocyte Adhesion and Diapedesis	4.1515455146239	-0.0
Nitric Oxide Signaling in the Cardiovascular System	1.95657901274106	2.13152437965191
Pancreatic Adenocarcinoma Signaling	3.10226501588877	0.969075574242324
p70S6K Signaling	3.20034895858732	0.827346335769062
IL-15 Signaling	3.68852533276715	0.331751052940743
14-3-3-mediated Signaling	2.75873570482224	1.23757427219586
Natural Killer Cell Signaling	3.02976118044442	0.943681127814568
IL-8 Signaling	3.12806105895813	0.838347248195515
Fc Epsilon RI Signaling	2.99425394085988	0.931265413586411
P2Y Purigenic Receptor Signaling Pathway	2.69537738582056	1.20867500328287
Gαq Signaling	3.30893242162423	0.583764209928429
FLT3 Signaling in Hematopoietic Progenitor Cells	2.80157423929936	1.05632559427182
UVB-Induced MAPK Signaling	2.39082110873805	1.43632481796517
HGF Signaling	3.17682228418923	0.632480773295665
IL-12 Signaling and Production in Macrophages	3.79099093352194	-0.0
CNTF Signaling	3.28076705935985	0.48944165851652
Citrulline Biosynthesis	0.568522181914949	3.16937294668778
OX40 Signaling Pathway	3.69528756195578
fMLP Signaling in Neutrophils	3.06576156599946	0.604715770518477
Triacylglycerol Degradation		3.67002319860088
T Helper Cell Differentiation	3.63335695995691
Angiopoietin Signaling	2.46622461256246	1.16653727836871
Graft-versus-Host Disease Signaling	3.61272458333646
Amyotrophic Lateral Sclerosis Signaling	2.89552140195715	0.702893286595801
Prostate Cancer Signaling	1.0535970392402	2.54226779256666
FAK Signaling	2.76320687180421	0.832143416803212
GDNF Family Ligand-Receptor Interactions	3.57930214182876	-0.0
Rac Signaling	3.21489747840321	0.35405591495636607
p53 Signaling	2.85885547437814	0.692320368639899
Signaling by Rho Family GTPases	3.54649308068343	-0.0
Intrinsic Prothrombin Activation Pathway	3.23100133724722	0.310437233310784
VEGF Family Ligand-Receptor Interactions	2.0537178944075	1.46545260433956
Phospholipase C Signaling	3.18274447726005	0.329747825085744
Neurotrophin/TRK Signaling	2.38403280642636	1.12824242174709
Neuropathic Pain Signaling In Dorsal Horn Neurons	2.82273850777638	0.681924993227036
HIF1α Signaling	2.78715869853763	0.671703319439303
G-Protein Coupled Receptor Signaling	0.937521044721376	2.5130775019848
Cysteine Biosynthesis III (mammalia)	0.29445661154794295	3.13627430382249
IL-3 Signaling	2.80157423929936	0.625396467774102
Lymphotoxin β Receptor Signaling	2.99115632772286	0.435064887473367
Glioblastoma Multiforme Signaling	2.833681293322	0.583764209928429
Melanoma Signaling	2.28571877297368	1.11364152584723
Caveolar-mediated Endocytosis Signaling	3.37353794619907	-0.0
Paxillin Signaling	3.37277387720139	-0.0
Sphingosine-1-phosphate Signaling	3.02976118044442	0.324821767335268
Allograft Rejection Signaling	3.34346364623704
Glycine Betaine Degradation	0.487675666254248	2.85374798885646
GM-CSF Signaling	2.59644868339486	0.740904998873676
Role of NFAT in Cardiac Hypertrophy	2.87834271356319	0.392626802417898
Cysteine Biosynthesis/Homocysteine Degradation		3.25167183163436
Glycine Degradation (Creatine Biosynthesis)		3.25167183163436
Glioma Invasiveness Signaling	2.83424788860138	0.405999975028432
Cardiac Hypertrophy Signaling	2.64795265104395	0.572914169423347
Nicotine Degradation II	3.21975427973576
Crosstalk between Dendritic Cells and Natural Killer Cells	3.21016420303052
CXCR4 Signaling	2.66713463670912	0.540598224879203
Retinol Biosynthesis		3.19538494968872
eNOS Signaling	1.80991576786286	1.3777946574
Calcium-induced T Lymphocyte Apoptosis	2.78443440647511	0.39683847871869393
Thrombin Signaling	2.60755748925246	0.547257712021552
Role of p14/p19ARF in Tumor Suppression	3.14458409282795
Glioma Signaling	1.98518317919324	1.1389332812161
Xenobiotic Metabolism Signaling	2.29565111426735	0.807663456878471
Gap Junction Signaling	2.24188380725344	0.824806664583085
Erythropoietin Signaling	2.38403280642636	0.673817261111325
JAK/Stat Signaling	2.75837702020066	0.291009490304231
Clathrin-mediated Endocytosis Signaling	2.67871218394676	0.35431977412795507
Death Receptor Signaling	2.57883355538025	0.4363843552732021
Role of PI3K/AKT Signaling in the Pathogenesis of Influenza	2.64183505667994	0.370802405561193
B Cell Receptor Signaling	2.58216404048035	0.418592030307655
Role of IL-17A in Arthritis	2.99115632772286
Autoimmune Thyroid Disease Signaling	2.98905684083572
Tec Kinase Signaling	2.97780649167643	-0.0
ErbB4 Signaling	2.17237325823965	0.80062768468386
Chondroitin Sulfate Degradation (Metazoa)	2.9250466341882
Agranulocyte Adhesion and Diapedesis	2.90435636292364	-0.0
CREB Signaling in Neurons	2.22650695312201	0.671766665116487
Endoplasmic Reticulum Stress Pathway		2.86934833967949
Superpathway of Inositol Phosphate Compounds	2.28330448563602	0.566297294946363
Cdc42 Signaling	2.83832522440587	-0.0
ILK Signaling	1.97472479094846	0.855729918941229
Colorectal Cancer Metastasis Signaling	2.07552140045623	0.735700570027352
Telomerase Signaling	2.40888529666872	0.39979960828835204
T Cell Receptor Signaling	2.40888529666872	0.39979960828835204
LPS/IL-1 Mediated Inhibition of RXR Function	2.15970580837076	0.648471411021017
Aldosterone Signaling in Epithelial Cells	2.24188380725344	0.540598224879203
Tyrosine Biosynthesis IV		2.78143427059373
Role of Osteoblasts, Osteoclasts and Chondrocytes in Rheumatoid Arthritis	2.78041537994998	-0.0
Phospholipases	2.34489055812036	0.435064887473367
Superpathway of Citrulline Metabolism	0.373012907759567	2.40245317483645
Small Cell Lung Cancer Signaling	1.71189018996583	1.05632559427182
NF-κB Activation by Viruses	2.15720137421543	0.602745557375895
ErbB Signaling	2.26543201747345	0.48524436901036894
Primary Immunodeficiency Signaling	2.74935357592206
CTLA4 Signaling in Cytotoxic T Lymphocytes	2.72509381181327	-0.0
Mouse Embryonic Stem Cell Pluripotency	1.98518317919324	0.735717542374144
Superpathway of Methionine Degradation	0.47194518615906705	2.22953274454871
PAK Signaling	2.68761502317222	-0.0
Ephrin A Signaling	2.63971839560583	-0.0
Role of Tissue Factor in Cancer	1.26035462581232	1.37781801970072
NF-κB Signaling	2.63157271162528	-0.0
Ovarian Cancer Signaling	1.92322957039571	0.707953612829806
PTEN Signaling	1.40917249678576	1.20867500328287
IGF-1 Signaling	1.9007555151799	0.702893286595801
Type I Diabetes Mellitus Signaling	2.5843440395461	-0.0
IL-6 Signaling	2.28258186880981	0.28321010059796
Systemic Lupus Erythematosus Signaling	2.54850620534352	-0.0
Melanocyte Development and Pigmentation Signaling	2.29933778140854	0.22531984101649496
SAPK/JNK Signaling	2.50921665433662	-0.0
IL-17A Signaling in Airway Cells	2.50867682675501	-0.0
CD40 Signaling	2.50867682675501
Proline Biosynthesis I		2.48727439460387
Branched-chain α-keto acid Dehydrogenase Complex		2.48727439460387
Nur77 Signaling in T Lymphocytes	2.48636894573206	-0.0
Actin Cytoskeleton Signaling	2.48409185494432	-0.0
Antiproliferative Role of Somatostatin Receptor 2	2.09226607476993	0.37924840437820895
Wnt/β-catenin Signaling	0.715325199522865	1.75401489487783
VEGF Signaling	1.66771378172836	0.794371319782421
Ceramide Signaling	1.92481909957837	0.530681466290702
LPS-stimulated MAPK Signaling	2.15720137421543	0.2847884898169579
Renal Cell Carcinoma Signaling	1.77434925815526	0.64906574812851
Altered T Cell and B Cell Signaling in Rheumatoid Arthritis	2.40474907632059
B Cell Development	2.40242770208798
Communication between Innate and Adaptive Immune Cells	2.36898029896414
GPCR-Mediated Integration of Enteroendocrine Signaling Exemplified by an L Cell	1.27737633748005	1.07375006818416
Synaptic Long Term Potentiation	1.09762140598314	1.23757427219586
Breast Cancer Regulation by Stathmin1	1.80459691113301	0.52884500487828
NGF Signaling	1.67051193667261	0.613819922539996
RANK Signaling in Osteoclasts	2.23211621867485	-0.0
CCR3 Signaling in Eosinophils	1.91973997328937	0.29812086033806895
VDR/RXR Activation	0.754431038832597	1.44448117770151
Nicotine Degradation III	2.18494640162163
Relaxin Signaling	1.15710687592108	1.02626939260765
Wnt/Ca+ pathway	0.790781800602418	1.38589002412319
Bladder Cancer Signaling	0.371497388049979	1.7857910618381
Neuregulin Signaling	1.31680887372878	0.832143416803212
Insulin Receptor Signaling	0.647426224524202	1.48373265373576
Tetrahydrobiopterin Biosynthesis II	0.953362936227678	1.15853245489242
Tetrahydrobiopterin Biosynthesis I	0.953362936227678	1.15853245489242
Cellular Effects of Sildenafil (Viagra)	0.971033947576693	1.12643442890835
Hereditary Breast Cancer Signaling	1.16708490010972	0.89510108607087
Melatonin Degradation I	2.04493809387053
Heparan Sulfate Biosynthesis	-0.0	2.01730972348853
PEDF Signaling	1.71189018996583	0.29738465234585904
Antioxidant Action of Vitamin C	1.98518317919324	-0.0
IL-17 Signaling	1.68164242853196	0.291009490304231
Maturity Onset Diabetes of Young (MODY) Signaling		1.95230503095773
IL-15 Production	1.07412904977085	0.874283543792703
Superpathway of D-myo-inositol (1,4,5)-trisphosphate Metabolism	0.213773681943649	1.73324418882438
Chronic Myeloid Leukemia Signaling	1.18827235042356	0.758564172163034
Notch Signaling	1.27515063269527	0.660767556063078
Choline Biosynthesis III	1.9121897650463
Bupropion Degradation	1.89908540477276
Thyroid Cancer Signaling	-0.0	1.87647385466516
Biotin-carboxyl Carrier Protein Assembly	0.836760743511917	1.03871692006219
Galactose Degradation I (Leloir Pathway)	1.86162432671578
Dopamine-DARPP32 Feedback in cAMP Signaling	1.08140683833522	0.770181974302037
Sperm Motility	0.567429377674411	1.28241052659536
Agrin Interactions at Neuromuscular Junction	1.83956402922153	-0.0
Superpathway of Melatonin Degradation	1.83709495346241
Acetone Degradation I (to Methylglyoxal)	1.83652950024044
FGF Signaling	1.33967575762125	0.48524436901036894
Gα12/13 Signaling	1.82129993983462	-0.0
Colanic Acid Building Blocks Biosynthesis	1.81989604561174
Dermatan Sulfate Degradation (Metazoa)	1.81989604561174
cAMP-mediated signaling	0.341990361622198	1.4737657256159
IL-10 Signaling	1.80660138371351
Cytotoxic T Lymphocyte-mediated Apoptosis of Target Cells	1.51935409005696	0.28001324484543794
Huntington's Disease Signaling	1.2539136226714	0.538369823179995
Type II Diabetes Mellitus Signaling	1.49111680186083	0.293061909900123
PCP pathway	1.04317276806301	0.740904998873676
Neuroprotective Role of THOP1 in Alzheimer's Disease	1.17270476538544	0.611252794408835
Role of PKR in Interferon Induction and Antiviral Response	1.17270476538544	0.611252794408835
ERK5 Signaling	-0.0	1.77817268883987
TR/RXR Activation	1.77678471598435	-0.0
PXR/RXR Activation	1.02046310943013	0.72685257246014
Apoptosis Signaling	1.27235337512549	0.460093383820852
Cell Cycle Control of Chromosomal Replication	1.7206120506913
Superoxide Radicals Degradation	1.69670577969536
Inhibition of Angiogenesis by TSP1	0.904750612973369	0.756619112777619
Molecular Mechanisms of Cancer	1.18899271396837	0.4604177103124
Threonine Degradation II		1.62534572421259
L-cysteine Degradation II		1.62534572421259
iNOS Signaling	1.61643452794268
mTOR Signaling	1.02328528824128	0.579350216469945
Methionine Degradation I (to Homocysteine)	0.330424230985994	1.26761071796469
Retinoic acid Mediated Apoptosis Signaling	1.58951571843605	-0.0
Chemokine Signaling	0.915038780826707	0.661302012739632
Heparan Sulfate Biosynthesis (Late Stages)	-0.0	1.57424702184817
Protein Kinase A Signaling	0.579147434467793	0.98665374848332
3-phosphoinositide Biosynthesis	1.56520821669617	-0.0
Arginine Degradation VI (Arginase 2 Pathway)	0.677176077626897	0.872810486648494
Estrogen Biosynthesis	1.31192382352808	0.23763776010556398
p38 MAPK Signaling	0.325397879365371	1.22302787536849
Role of NANOG in Mammalian Embryonic Stem Cell Pluripotency	1.22214824233623	0.319287487760559
Netrin Signaling	0.349503688992998	1.19055962572398
Glucocorticoid Receptor Signaling	1.12175283027776	0.384893676165611
Glutathione-mediated Detoxification	1.15433350217212	0.34569418880341
GPCR-Mediated Nutrient Sensing in Enteroendocrine Cells	0.995207419333047	0.502868400772815
Protein Ubiquitination Pathway	0.407689217011905	1.09003692905764
γ-glutamyl Cycle	0.95044181972551	0.519687134788453
PI3K/AKT Signaling	0.29902104017820497	1.16674344414689
D-myo-inositol (1,4,5)-Trisphosphate Biosynthesis	1.11319909243506	0.333334741008447
Eicosanoid Signaling	0.680560705661429	0.755296596332372
Sorbitol Degradation I	1.41364450360375
UDP-N-acetyl-D-galactosamine Biosynthesis I	1.41364450360375
Thiamin Salvage III	1.41364450360375
Glutamine Biosynthesis I	1.41364450360375
D-myo-inositol (1,3,4)-trisphosphate Biosynthesis	0.27848640848939493	1.1338220684448
1D-myo-inositol Hexakisphosphate Biosynthesis II (Mammalian)	0.27848640848939493	1.1338220684448
Cell Cycle: G2/M DNA Damage Checkpoint Regulation	0.922150287693066	0.48944165851652
HMGB1 Signaling	1.40917249678576	-0.0
Germ Cell-Sertoli Cell Junction Signaling	1.40381353327807	-0.0
Ephrin Receptor Signaling	0.461177894996158	0.938576579415834
Serotonin Receptor Signaling	0.302581896629769	1.0895872002953
Interferon Signaling	1.38988886570056
Prostanoid Biosynthesis	1.34978550205642
α-Adrenergic Signaling	1.33967575762125	-0.0
Glycine Biosynthesis I		1.32947998473266
Proline Degradation		1.32947998473266
Putrescine Biosynthesis III		1.32947998473266
Glutamine Degradation I		1.32947998473266
Sucrose Degradation V (Mammalian)	0.568522181914949	0.757974490757319
Airway Pathology in Chronic Obstructive Pulmonary Disease	0.568522181914949	0.757974490757319
tRNA Splicing		1.30590363251285
Gαi Signaling	0.497837785991966	0.806026753842832
TREM1 Signaling	1.30257085983713	-0.0
Regulation of the Epithelial-Mesenchymal Transition Pathway	1.30196914014785	-0.0
Polyamine Regulation in Colon Cancer	0.23702553799114204	1.02310399562
Inhibition of Matrix Metalloproteases	1.23973881781748
Synaptic Long Term Depression	0.575166174724028	0.663750219281083
UDP-N-acetyl-D-galactosamine Biosynthesis II	0.525429045199723	0.711842568413969
tRNA Charging		1.2179259230286
Hypoxia Signaling in the Cardiovascular System	-0.0	1.20652561800633
D-myo-inositol-5-phosphate Metabolism	0.807888035973964	0.39443748425321395
Dopamine Receptor Signaling	0.24035291514332302	0.95882270377299
Valine Degradation I		1.17546555727212
D-myo-inositol (1,4,5)-trisphosphate Degradation		1.17546555727212
Human Embryonic Stem Cell Pluripotency	1.17349057796233	-0.0
IL-22 Signaling	0.213773681943649	0.95900021016632
GNRH Signaling	0.436559980423157	0.735960559564769
Spermidine Biosynthesis I		1.15853245489242
S-adenosyl-L-methionine Biosynthesis		1.15853245489242
Trehalose Degradation II (Trehalase)		1.15853245489242
RhoGDI Signaling	1.15619483168688	-0.0
MIF Regulation of Innate Immunity	1.14094949740819
Toll-like Receptor Signaling	0.520021316364995	0.613947496357102
GDP-L-fucose Biosynthesis I (from GDP-D-mannose)	1.12106212231405
Taurine Biosynthesis	1.12106212231405
Sulfate Activation for Sulfonation	1.12106212231405
Regulation of eIF4 and p70S6K Signaling	0.510664498482675	0.606654921710573
STAT3 Pathway	0.821647934972339	0.2847884898169579
CDK5 Signaling	-0.0	1.07874467538169
Bile Acid Biosynthesis, Neutral Pathway	1.05784437698721
NAD Biosynthesis III		1.03871692006219
Tight Junction Signaling	0.337377269213169	0.695106797091387
Sonic Hedgehog Signaling	1.00156481668063
Regulation of IL-2 Expression in Activated and Anergic T Lymphocytes	0.449985522633406	0.550200282669795
Aryl Hydrocarbon Receptor Signaling	-0.0	0.99124921824689
Tumoricidal Function of Hepatic Natural Killer Cells	0.626370400858044	0.358728826263226
PPARα/RXRα Activation	0.725627710249931	0.25831661958791596
Ubiquinol-10 Biosynthesis (Eukaryotic)	0.397413769109196	0.572019161913227
Estrogen-mediated S-phase Entry		0.95900021016632
Glutathione Redox Reactions II	0.953362936227678
Coenzyme A Biosynthesis	0.953362936227678
1,25-dihydroxyvitamin D3 Biosynthesis	0.953362936227678
L-serine Degradation	0.953362936227678
dTMP De Novo Biosynthesis		0.946909582235071
Folate Polyglutamylation		0.946909582235071
Lysine Degradation V		0.946909582235071
Protein Citrullination		0.946909582235071
NAD Salvage Pathway III		0.946909582235071
CCR5 Signaling in Macrophages	0.935099012816713	-0.0
Pyrimidine Ribonucleotides Interconversion		0.92936301316361
Regulation of Actin-based Motility by Rho	0.922726848040498
Role of JAK2 in Hormone-like Cytokine Signaling	0.904750612973369
Extrinsic Prothrombin Activation Pathway	0.903237002865108
Chondroitin Sulfate Biosynthesis	-0.0	0.90225499368485
Calcium Signaling	0.476032834218374	0.42398389509069195
MIF-mediated Glucocorticoid Regulation	0.875265267532217
Pyrimidine Ribonucleotides De Novo Biosynthesis		0.874283543792703
GDP-glucose Biosynthesis		0.872810486648494
NAD Biosynthesis from 2-amino-3-carboxymuconate Semialdehyde		0.872810486648494
Proline Biosynthesis II (from Arginine)		0.872810486648494
Acetyl-CoA Biosynthesis I (Pyruvate Dehydrogenase Complex)		0.872810486648494
Selenocysteine Biosynthesis II (Archaea and Eukaryotes)		0.872810486648494
Basal Cell Carcinoma Signaling	0.559281675732549	0.310617156926509
Ethanol Degradation IV	0.859626955845843
Glutathione Redox Reactions I	0.859626955845843
AMPK Signaling	0.859028298674807	-0.0
Dermatan Sulfate Biosynthesis	-0.0	0.849475524694912
Creatine-phosphate Biosynthesis	0.836760743511917
Arginine Degradation I (Arginase Pathway)	0.836760743511917
L-cysteine Degradation I	0.836760743511917
Heme Degradation	0.836760743511917
Arsenate Detoxification I (Glutaredoxin)	0.836760743511917
Glutamate Receptor Signaling	-0.0	0.832777944653633
Gustation Pathway	-0.0	0.827346335769062
Granzyme B Signaling	0.330424230985994	0.496535684563577
Cholecystokinin/Gastrin-mediated Signaling	0.45537425462705394	0.366522331616481
Ephrin B Signaling	0.821647934972339	-0.0
Coagulation System	0.819955249222945
Glucose and Glucose-1-phosphate Degradation		0.810925325989577
Glycoaminoglycan-protein Linkage Region Biosynthesis		0.810925325989577
G Beta Gamma Signaling	-0.0	0.806736663279582
Retinoate Biosynthesis I		0.800651526315995
Induction of Apoptosis by HIV1	0.398843554100075	0.38792426633519894
G Protein Signaling Mediated by Tubby	0.47194518615906705	0.28001324484543794
Acetate Conversion to Acetyl-CoA	0.748131766300988
Triacylglycerol Biosynthesis		0.73592473831731
Cell Cycle: G1/S Checkpoint Regulation		0.72685257246014
Folate Transformations I		0.711842568413969
Calcium Transport I		0.711842568413969
Activation of IRF by Cytosolic Pattern Recognition Receptors	0.697659922951464
Cardiac β-adrenergic Signaling	-0.0	0.689911287530514
Role of MAPK Signaling in the Pathogenesis of Influenza	-0.0	0.686620399524709
GABA Receptor Signaling	-0.0	0.686620399524709
Urea Cycle	0.677176077626897
GDP-mannose Biosynthesis	0.677176077626897
Ceramide Degradation	0.677176077626897
UDP-N-acetyl-D-glucosamine Biosynthesis II	0.677176077626897
Oncostatin M Signaling	0.420721592978643	0.253495133022499
Pyrimidine Deoxyribonucleotides De Novo Biosynthesis I	0.24988010913056696	0.402516709571025
NAD Salvage Pathway II	0.24988010913056696	0.402516709571025
Sertoli Cell-Sertoli Cell Junction Signaling	-0.0	0.641866483965748
Glutaryl-CoA Degradation		0.634672086089684
Corticotropin Releasing Hormone Signaling	0.634636065993762	-0.0
Melatonin Signaling	0.309124198570765	0.317484889494687
Lipid Antigen Presentation by CD1	0.626370400858044
Pregnenolone Biosynthesis	0.618399405122956
Cleavage and Polyadenylation of Pre-mRNA		0.601842635483864
IL-17A Signaling in Gastric Cells	0.600584132173374
BMP signaling pathway	-0.0	0.591783480737541
Dermatan Sulfate Biosynthesis (Late Stages)	-0.0	0.581006194120584
UVC-Induced MAPK Signaling	-0.0	0.581006194120584
Thyroid Hormone Metabolism II (via Conjugation and/or Degradation)	0.576207065863158
NAD biosynthesis II (from tryptophan)		0.572019161913227
D-myo-inositol (3,4,5,6)-tetrakisphosphate Biosynthesis	0.305415790801085	0.26452189743407795
D-myo-inositol (1,4,5,6)-Tetrakisphosphate Biosynthesis	0.305415790801085	0.26452189743407795
Salvage Pathways of Pyrimidine Deoxyribonucleotides	0.568522181914949
Sphingomyelin Metabolism	0.568522181914949
Sphingosine and Sphingosine-1-phosphate Metabolism	0.568522181914949
Chondroitin Sulfate Biosynthesis (Late Stages)	-0.0	0.552719762769013
Gluconeogenesis I	0.20323316243415196	0.34569418880341
TNFR2 Signaling	0.531245586480741
Mechanisms of Viral Exit from Host Cells	0.325066976998596	0.20322457106111
Pathogenesis of Multiple Sclerosis	0.525429045199723
The Visual Cycle		0.519687134788453
Leukotriene Biosynthesis		0.519687134788453
CD27 Signaling in Lymphocytes	0.502650844140918	-0.0
RhoA Signaling	0.497837785991966
Mismatch Repair in Eukaryotes		0.496535684563577
Parkinson's Signaling		0.496535684563577
Oleate Biosynthesis II (Animals)	0.487675666254248
Histidine Degradation VI	0.487675666254248
Ketogenesis	0.487675666254248
HIPPO signaling	-0.0	0.48524436901036894
Amyloid Processing	-0.0	0.477914711670228
Tryptophan Degradation III (Eukaryotic)		0.43641140408503903
GADD45 Signaling		0.43641140408503903
DNA damage-induced 14-3-3σ Signaling		0.43641140408503903
Regulation of Cellular Mechanics by Calpain Protease	-0.0	0.425102979362515
BER pathway	0.424337118714432
Mevalonate Pathway I	0.424337118714432
Salvage Pathways of Pyrimidine Ribonucleotides	-0.0	0.421328376281416
IL-17A Signaling in Fibroblasts	0.405179212121654
Guanosine Nucleotides Degradation III	0.397413769109196
3-phosphoinositide Degradation	-0.0	0.388717508472999
DNA Double-Strand Break Repair by Homologous Recombination	0.373012907759567
Urate Biosynthesis/Inosine 5'-phosphate Degradation	0.373012907759567
Glycolysis I		0.358728826263226
Oxidative Ethanol Degradation III	0.350778677210032
PPAR Signaling	0.33763185428063	-0.0
Transcriptional Regulatory Network in Embryonic Stem Cells	0.33702798860064
Antiproliferative Role of TOB in T Cell Signaling	-0.0	0.333334741008447
Superpathway of Geranylgeranyldiphosphate Biosynthesis I (via Mevalonate)	0.330424230985994
Adenosine Nucleotides Degradation II	0.330424230985994
Role of Hypercytokinemia/hyperchemokinemia in the Pathogenesis of Influenza	0.325066976998596
Role of RIG1-like Receptors in Antiviral Innate Immunity	0.325066976998596
Androgen Signaling	-0.0	0.313852294692339
RAR Activation	0.298217348230488	-0.0
Differential Regulation of Cytokine Production in Macrophages and T Helper Cells by IL-17A and IL-17F	0.29445661154794295
Hepatic Cholestasis	-0.0	0.28613176572409493
Purine Nucleotides Degradation II (Aerobic)	0.27848640848939493
nNOS Signaling in Neurons	0.27209240230026804	-0.0
DNA Methylation and Transcriptional Repression Signaling	0.26366672522326406
TNFR1 Signaling	0.2627091648987209	-0.0
TWEAK Signaling	-0.0	0.261947080726092
Circadian Rhythm Signaling		0.261947080726092
Stearate Biosynthesis I (Animals)		0.253495133022499
Cell Cycle Regulation by BTG Family Proteins		0.245399073771239
Adipogenesis pathway	-0.0	0.238834907962091
Differential Regulation of Cytokine Production in Intestinal Epithelial Cells by IL-17A and IL-17F	0.22501549768852705
April Mediated Signaling	-0.0	0.22304332311442196
Role of JAK1, JAK2 and TYK2 in Interferon Signaling	0.213773681943649
B Cell Activating Factor Signaling	-0.0	0.20957434400698496
Role of JAK family kinases in IL-6-type Cytokine Signaling	0.20323316243415196
Role of IL-17F in Allergic Inflammatory Airway Diseases	-0.0	0.20322457106111
Mitochondrial Dysfunction	-0.0	-0.0
Estrogen Receptor Signaling		-0.0
4-1BB Signaling in T Lymphocytes	-0.0
Pyridoxal 5'-phosphate Salvage Pathway		-0.0
IL-1 Signaling	-0.0	-0.0
Actin Nucleation by ARP-WASP Complex	-0.0	-0.0
Semaphorin Signaling in Neurons	-0.0	-0.0
Cyclins and Cell Cycle Regulation	-0.0	-0.0
EIF2 Signaling	-0.0	-0.0
Phototransduction Pathway	-0.0
TGF-β Signaling	-0.0	-0.0
Remodeling of Epithelial Adherens Junctions	-0.0	-0.0
ATM Signaling	-0.0	-0.0
Role of CHK Proteins in Cell Cycle Checkpoint Control		-0.0
Ethanol Degradation II	-0.0
Oxidative Phosphorylation	-0.0
Serotonin Degradation	-0.0
Hematopoiesis from Pluripotent Stem Cells	-0.0
Mitotic Roles of Polo-Like Kinase	-0.0	-0.0
Gαs Signaling	-0.0	-0.0
Epithelial Adherens Junction Signaling	-0.0	-0.0
Factors Promoting Cardiogenesis in Vertebrates	-0.0	-0.0
Role of Oct4 in Mammalian Embryonic Stem Cell Pluripotency	-0.0	-0.0
Superpathway of Cholesterol Biosynthesis	-0.0
Role of Wnt/GSK-3β Signaling in the Pathogenesis of Influenza	-0.0	-0.0
Role of Cytokines in Mediating Communication between Immune Cells	-0.0
Role of BRCA1 in DNA Damage Response	-0.0	-0.0

## Sheet: Upstream Reg. Comparison 2-fold
© 2000-2015 QIAGEN. All rights reserved.
Upstream regulators	DE_Ptf1a_cKO 2wk-3KO_edgeR 01-08-2015 UP - 2015-01-25 08:11 PM	Downreg genes 012015 - 2015-01-25 08:23 PM
TNF	17.5129953394354
IFNG	17.0561784845484
TGFB1	13.6957333221007
TGM2	11.2573445874145
SMARCA4/BRG1	9.99653225297524
ERK1/2	8.10803942267248	1.46969088962728
MAPK1	8.49848931795984
IL27	8.40571969176672
CTNNB1	8.32911339285451
IRF2	6.00412436657062	2.2273726567124
CEBPA	6.84494196697291	1.34217281140832
RELA	7.66922568605319
ESR1	4.02579315015245	3.43503649002026
IL1B	7.43981620758451
AR	5.8768005969308	1.46969088962728
TCF	7.30545756084667
NFkB (complex)	5.78256490581266	1.34514781918157
LGALS3	3.3317209404459	3.62123991027922
STAT1	6.04641821310594
DICER1	5.96552411328923
NEUROG1	5.96552411328923
ZNF148	5.80074270468253
IL13	5.74147965615505
USF1	3.62717982603621	2.08842271188615
SYVN1	2.57744734125804	3.11946194087089
PRKCD	5.57710722997064
ERBB2	5.55437289796879
SPI1	5.50583531840999
STAT3	3.53509809584492	1.78035614351568
estrogen receptor	5.29208893483295
EBI3	5.28154714535257
MITF	5.26658780208586
RUNX3	3.08364782540632	2.15465994786039
TAB1	5.12871181076586
CNOT7	5.02960340204064
MAP2K1/2	3.62717982603621	1.34070776224061
IRF1	4.96438519411922
Mek	3.02863358694293	1.90461801851489
PRDM1	4.91570692001818
TRIB3		4.8721657680549
TCF4	4.84831296395527
MYC	2.06573570960932	2.77064483986399
MAP3K7	4.81141581501395
MEMO1	1.51388865011011	3.24690116311336
IL1RN	4.59174931244126
P38 MAPK	4.54530005385309
WISP2	4.51400548395595
Hdac	4.45724266358298
TLR3	4.44953753527804
ERN1	4.33280591295773
GH1	4.24623241486207
BRD4		4.22316912243266
PDGF BB	4.13117355960242
TCR	4.11670375014616
ELF3	4.00538774227594
MYOC	1.52930265269017	2.45796459869478
TREM1	3.94430159241112
SIN3A	2.0876294600117	1.85448195081493
HIF1A	2.49030417430641	1.41854151007497
TWIST2	3.90400133170909
SMARCD3	3.90400133170909
T	3.90400133170909
MGEA5	3.86302794522123
ERK	3.82659837595223
IFNA2	3.77878783352965
miR-219a-5p (and other miRNAs w/seed GAUUGUC)	3.75931168984392
SMC3	3.75931168984392
SOX11	3.75848644345631
SPDEF	3.71555368739733
Hedgehog		3.67957099016022
Ap1	2.23576247692184	1.43650120447544
IL10	3.65528265942487
HIC1	2.28103187805954	1.35000658844678
CLDN7	1.6017356006624	2.02560813716487
PRKCA	3.58137045660054
DEF6	3.55304779327142
NLRC5	3.55304779327142
TNFSF11	3.55304779327142
IDH2	3.55304779327142
SRC	1.48846767585774	2.02442436679458
SATB1	3.46503088795757
GLI1	1.7282211246251	1.72987613501655
SMAD3	3.45535612873289
HNRNPA2B1	3.42136840200469
PDX1	2.07266212042575	1.34070776224061
ALB	3.3730353519396
IDH1	3.36912089904045
KDM5A	1.91593713589457	1.42275928557224
BCL6	3.33579666698131
RPRD1B		3.3049345977938
PXN		3.3049345977938
FOXA1	3.28407244432035
A2M		3.23580938254778
FOXO1	3.23509865477728
RFX5	3.20538199104882
Akt	3.19794059658993
IL21	3.11399334190713
EIF2AK2	3.11399334190713
SF1	3.08364782540632
LOXL2	3.08364782540632
DNAJB6	3.08364782540632
F10	3.08364782540632
E2F1	1.5202051640059	1.53710331443533
ATF4		3.05156036501816
PAF1	2.95371886558683
SP1	2.94940433318916
PDLIM2	2.91271317896115
IFNL1	2.9124279842072
CALR	2.89921178919585
RFXANK	2.89921178919585
FOXP1	2.89921178919585
DAB2IP	2.89921178919585
TAC4	2.89921178919585
BECN1	2.89921178919585
TP53	2.85769386736301
ETS	2.85223091272618
MIA	2.85223091272618
SMAD1	2.85223091272618
PDGFRA	2.85223091272618
RFXAP	2.85223091272618
ATAD2		2.83428553244783
ZMIZ2		2.83428553244783
CDX2	2.81102969148893
Pkc(s)	2.74724499567602
KIAA1524		2.70601411200012
PGR	2.70013601683918
TP63	2.68949133293222
EPAS1	2.67803765477527
IgG	2.66904917970455
IRF8	2.65971060116836
JAK1	2.58493750252112
CTGF	2.58493750252112
RUNX1	2.55529078697212
RNA polymerase II	2.548762232609
HNRNPA1		2.5397157266219
SNRK		2.5397157266219
RBCK1		2.5397157266219
SP3	2.53165843715729
S100A4	2.4951974166951
ITGB2	2.4951974166951
PPP2CA	2.4951974166951
TP73	2.43462157988858
MAPK7	2.43247537847666
CYBB	2.43247537847666
Ifn	2.43247537847666
FGF21	2.43247537847666
HTR7	2.43247537847666
ENTPD5	2.43247537847666
EGR1	2.41930885700453
GAPDH	2.41930885700453
SOCS1	2.41930885700453
KRAS	2.40667224506765
NR3C1	2.37792660565028
IGF1	2.36334607327943
Rxr	2.35185180306179
PKM		2.3243151294898
ELK1		2.30452750868354
FGF2	2.29446979741898
IFNB1	2.29446979741898
CHI3L1	2.23338470613116
ACSL5		2.2273726567124
NOX4	2.22508359138217
IFN1@	2.22508359138217
PIK3R1	2.22508359138217
ESR2		2.22393628735584
Creb	2.16767116991553
SREBF1	2.16767116991553
MDM2	2.15842736750628
YY1	2.15842736750628
PRKCZ		2.15465994786039
DDX17		2.15465994786039
PLSCR1		2.15465994786039
CSF1R		2.15465994786039
SMO		2.15465994786039
HTATIP2	2.14179881722397
mir-7	2.14179881722397
TEAD	2.14179881722397
FZD8	2.14179881722397
mir-148	2.14179881722397
CYP2E1	2.14179881722397
APLN	2.14179881722397
GLIPR2	2.14179881722397
HAS2	2.14179881722397
Calcineurin protein(s)	2.14179881722397
NFKB1	2.12732376393453
PPARG	2.12387597381914
IL4	2.11846359527558
SOX9	2.11165734971453
LGALS1	2.11165734971453
IL12 (family)	2.11165734971453
MYB	2.0876294600117
HLX	2.0876294600117
HDAC6	2.0876294600117
FOXO3	2.08128042108781
Jnk	2.05545038873271
COL18A1	2.05545038873271
CD28		2.05102321851393
CREBBP	2.02220695860668
STAT5B		2.01495587713455
Alpha catenin		2.01495587713455
CDK8		2.01495587713455
FBXW7		2.01495587713455
TGFB2	2.00920436920099
RNF31		1.96460986855674
PTGS2	1.96019999423305
NUPR1	1.94022412756592
HISTONE	1.93027193995808
PSMD4	1.93027193995808
AKT3	1.93027193995808
PLAA	1.93027193995808
MAD2L2	1.93027193995808
HSP90AA1	1.93027193995808
FES	1.93027193995808
ZBTB7B	1.93027193995808
ITGAL	1.93027193995808
mir-130	1.93027193995808
CREB1	1.92650509154013
VDR	1.91593713589457
ID1	1.91593713589457
IGF1R	1.89660573159128
UGT2B17		1.89642895573533
miR-451a (and other miRNAs w/seed AACCGUU)		1.89642895573533
UGT2B15		1.89642895573533
DDX5		1.89642895573533
miR-29b-3p (and other miRNAs w/seed AGCACCA)	1.83907906485423
IL3	1.83907906485423
CDH1	1.83907906485423
IL12 (complex)	1.83713180830861
IL15	1.83713180830861
STAT2	1.83047285410181
Ifn gamma	1.83047285410181
FGF7	1.83047285410181
CD40	1.80569361652696
PRKCE		1.80359665055447
PML	1.764470840032
AGT	1.764470840032
FGFR2	1.764470840032
VIPAS39	1.764470840032
TARBP2	1.764470840032
MCAM	1.764470840032
ATG5	1.764470840032
TSC22D3	1.764470840032
PBX1	1.764470840032
PURA	1.764470840032
PRKRA	1.764470840032
Gsk3		1.75517735690274
GATA4	1.7534452880602
ELF4	1.75171943766214
ITGAV	1.75171943766214
SPP1	1.75171943766214
ATF2	1.75171943766214
TLR4	1.7135596723355
RBL2		1.70902123447677
GLI2		1.70316150672765
SERPINF1		1.70316150672765
CHD4		1.70316150672765
IGFBP5		1.70316150672765
N-cor		1.70316150672765
NCL		1.70316150672765
EIF4E		1.70316150672765
NCR2	1.67879911739121
HGF	1.67867316288866
RBL1		1.66494942483602
JUN	1.65450136028651
KLF10		1.65199913233307
FKHR		1.65199913233307
RPS14		1.65199913233307
CALCOCO1		1.65199913233307
TDG		1.65199913233307
VENTX		1.65199913233307
MED26		1.65199913233307
VCAM1		1.65199913233307
SSBP2		1.65199913233307
CTNNBIP1		1.65199913233307
miR-185-3p (and other miRNAs w/seed GGGGCUG)		1.65199913233307
RNF14		1.65199913233307
NCOA5		1.65199913233307
ZMIZ1		1.65199913233307
RPS20		1.65199913233307
KRT10		1.65199913233307
TOP2A		1.65199913233307
CDC45		1.65199913233307
eIF2B		1.65199913233307
RPL21		1.65199913233307
MYH9		1.65199913233307
DYRK1A		1.65199913233307
MNK1/2		1.65199913233307
SNIP1		1.65199913233307
PLAC1		1.65199913233307
miR-23a-5p (and other miRNAs w/seed GGGUUCC)		1.65199913233307
ERF		1.65199913233307
EIF2A		1.65199913233307
PTRF		1.65199913233307
Cofilin		1.65199913233307
CXCL2		1.65199913233307
CDK11B		1.65199913233307
GTF2I		1.65199913233307
ITGB5		1.65199913233307
PRKACB		1.65199913233307
SLC20A1		1.65199913233307
GLIPR1		1.65199913233307
BAD		1.65199913233307
FLT4		1.65199913233307
CXCR2		1.65199913233307
HOXB13		1.65199913233307
EEF1A1		1.65199913233307
NRXN1	1.63379420996343
GATA1	1.63379420996343
KAT5		1.63023431714313
THY1	1.62860110084863
C3AR1	1.62860110084863
ELANE	1.62860110084863
mir-19	1.62860110084863
DYRK1B	1.62860110084863
mir-181	1.62860110084863
ATG7	1.62860110084863
ICAM1	1.62860110084863
WWTR1	1.62860110084863
GPI	1.62860110084863
PCM1	1.62860110084863
ADRB2	1.62860110084863
AHR		1.62280340616836
FABP2		1.62238647592488
HDAC1	1.61724650076655
SNAI1	1.61099565741215
CD24	1.60731850205349
CSF2	1.6017356006624
miR-122-5p (miRNAs w/seed GGAGUGU)		1.5734599230478
Growth hormone	1.56568304726354
HSPA5		1.54956807838321
MXI1		1.54956807838321
CDK9	1.54771691499265
SIN3B	1.54771691499265
TNFSF10	1.54771691499265
MMP2	1.54771691499265
CCL2	1.54771691499265
MAP2K1	1.5437149735685
IFN Beta	1.5437149735685
KDM5B	1.53932328211365
EGF	1.53137238365602
IRF4	1.53137238365602
ETS1	1.52930265269017
HNF1A	1.52227490275422
SCUBE3	1.51388865011011
NLRP12	1.51388865011011
ELF1	1.51388865011011
ADCY	1.51388865011011
NCAM1	1.51388865011011
BCL3	1.51388865011011
RETN	1.51388865011011
SMURF2	1.51388865011011
SMAD4	1.50153104226926
SBDS	1.50153104226926
NEDD9	1.50134521531676
FANCC	1.49803343910733
FOSL1	1.48846767585774
RAD21	1.48846767585774
KLF4	1.48846767585774
EHF	1.47388974773971
TERT		1.47086590991569
ETV5	1.4606090144295
IL6	1.4535321632439
SHP	1.44931641898717
TNFRSF10A	1.44931641898717
TJP1	1.44931641898717
thyroid hormone receptor	1.44931641898717
KDM4B	1.44931641898717
RYK	1.44931641898717
tyrosine kinase	1.44931641898717
ACPP	1.44931641898717
ALG6	1.44931641898717
FAF1	1.44931641898717
ACOT8	1.44931641898717
CMKLR1	1.44931641898717
CGB (includes others)	1.44931641898717
USP13	1.44931641898717
PRR13	1.44931641898717
SNCG	1.44931641898717
FALEC	1.44931641898717
ODC1	1.44931641898717
CDC42	1.44931641898717
TFF3	1.44931641898717
G protein	1.44931641898717
MGAT4C	1.44931641898717
ZBTB32	1.44931641898717
ABHD5	1.44931641898717
Mannosidase2	1.44931641898717
AGTR1	1.44931641898717
CAPNS1	1.44931641898717
DDOST	1.44931641898717
PPAP2B	1.44931641898717
ITPR	1.44931641898717
MOGS	1.44931641898717
WWP1	1.44931641898717
miR-196a-5p (and other miRNAs w/seed AGGUAGU)	1.44931641898717
ADCYAP1	1.44931641898717
DMTF1	1.44931641898717
mir-493	1.44931641898717
cAMP-Gef	1.44931641898717
ALG8	1.44931641898717
CTSV	1.44931641898717
PRPF4	1.44931641898717
S100A14	1.44931641898717
ITGB4	1.44931641898717
COL4A3	1.44931641898717
ALG5	1.44931641898717
Calmodulin	1.44931641898717
GPBP1	1.44931641898717
SLC2A1	1.44931641898717
ALG10	1.44931641898717
BRMS1	1.44931641898717
EEF2K	1.44931641898717
GSTT1	1.44931641898717
PA2G4	1.44931641898717
CSNK2A1	1.44931641898717
COMP	1.44931641898717
mir-196	1.44931641898717
SRRM1	1.44931641898717
RACGAP1	1.44931641898717
CDC7	1.44931641898717
Adaptor protein 2	1.44931641898717
ASB9	1.44931641898717
miR-18a-5p (and other miRNAs w/seed AAGGUGC)	1.44931641898717
p70 S6k	1.44931641898717
LIMS1	1.44931641898717
CDC14A	1.44931641898717
Ck2	1.44931641898717
EWSR1	1.44931641898717
PRMT6	1.44931641898717
GLIS3	1.44931641898717
IL33	1.43282955032477
SMAD2	1.43282955032477
POU2F1	1.43282955032477
FOXA2	1.43282955032477
CSF1	1.43282955032477
CARM1		1.42275928557224
AZGP1		1.42275928557224
miR-16-5p (and other miRNAs w/seed AGCAGCA)		1.42275928557224
BCL11B		1.42275928557224
HAND2	1.42140878236616
TBX5	1.42140878236616
PPARA	1.42140878236616
EGFR		1.41926284624894
MNT	1.41493830969012
UBE3A	1.41493830969012
CBL	1.41493830969012
RLIM	1.41493830969012
Tgf beta	1.41493830969012
let-7a-5p (and other miRNAs w/seed GAGGUAG)	1.41493830969012
WWC1	1.41493830969012
MAPK9	1.40345060738633
EP300		1.39564565063638
HMGB1	1.38044583338625
BMP7	1.38044583338625
USF2	1.38044583338625
mir-155	1.38044583338625
PSMD10		1.36693712286766
mir-21		1.36693712286766
RAC1		1.36693712286766
CXCR4		1.36693712286766
NDUFAB1		1.35582475333402
miR-193a-3p (and other miRNAs w/seed ACUGGCC)		1.35582475333402
miR-183-5p (miRNAs w/seed AUGGCAC)		1.35582475333402
DNAJC3		1.35582475333402
NOS3		1.35582475333402
PCYT1A		1.35582475333402
DACH1		1.35582475333402
GPBAR1		1.35582475333402
FTH1		1.35582475333402
FAM103A1		1.35582475333402
PECAM1		1.35582475333402
MTBP		1.35582475333402
FTL		1.35582475333402
PRKACA		1.35582475333402
RBP3		1.35582475333402
KHDRBS1		1.35582475333402
ALOX5		1.35582475333402
EIF4EBP1		1.35582475333402
FIGF		1.35582475333402
CDC27		1.35582475333402
NF1		1.35582475333402
PMEPA1		1.35582475333402
FGFR4		1.35582475333402
P2RY2		1.35582475333402
miR-375-3p (and other miRNAs w/seed UUGUUCG)		1.35582475333402
RPLP2		1.35582475333402
RFX3		1.35582475333402
GUCY1A3		1.35582475333402
mir-23		1.35582475333402
PIWIL2		1.35582475333402
RPL15		1.35582475333402
EIF4F		1.35582475333402
VTCN1		1.35582475333402
KDM4C		1.35582475333402
LIMK1		1.35582475333402
AIRE		1.35582475333402
RPA2		1.35582475333402
TCF/LEF		1.35582475333402
GLRX3		1.35582475333402
NCK1		1.35582475333402
NUBP1		1.35582475333402
HDAC7		1.35582475333402
ENO1		1.35582475333402
AFF4		1.35582475333402
BCAS3		1.35582475333402
ISX		1.35582475333402
MAML1		1.35582475333402
KDM1A	1.32819012421325
ITGB3	1.32819012421325
CLCA2	1.32819012421325
TGFBR1	1.32819012421325
ADAM15	1.32819012421325
LRP6	1.32819012421325
PTGER4	1.32819012421325
PRKAR1A	1.32819012421325
MTA3	1.32819012421325
BCR (complex)	1.31628122931238
PRL		1.31525848084389
FN1		1.31525848084389
IKBKE		1.31525848084389
