# Supplementary material for: The acinar differentiation determinant PTF1A inhibits initiation of pancreatic ductal adenocarcinoma
Source: eLife journal article supplement (doi:10.7554/elife.07125), 2015-07-07
Supplement: supp [file elife-07125-supp-v1.zip › elife_poa_e07125_Supplementary_File_5.xls]

## Sheet: Canonical Pathways UP 3-fold
© 2000-2015 QIAGEN. All rights reserved.
Ingenuity Canonical Pathways	-log(p-value)	Ratio	z-score	Molecules
iCOS-iCOSL Signaling in T Helper Cells	1.01E01	1.46E-01	3.000	ITPR2,HLA-DQA1,HLA-DQB1,ICOSLG/LOC102723996,IL2RB,PIK3R1,VAV1,IL2RG,HLA-DRA,LCP2,PIK3CD,HLA-DRB5,PTPRC,PIK3C2G,PIK3C3
CD28 Signaling in T Helper Cells	7.56E00	1.15E-01	3.000	JUN,ITPR2,HLA-DQA1,HLA-DQB1,PIK3R1,VAV1,HLA-DRA,LCP2,PIK3CD,HLA-DRB5,PTPRC,PIK3C2G,PIK3C3
PKCθ Signaling in T Lymphocytes	6.63E00	1.06E-01	2.000	JUN,LCP2,PIK3CD,HLA-DQA1,HLA-DQB1,HLA-DRB5,PIK3R1,RAC2,VAV1,PIK3C3,HLA-DRA,PIK3C2G
Antigen Presentation Pathway	5.8E00	1.89E-01		CD74,HLA-DQA1,NLRC5,HLA-DRB5,B2M,HLA-DRA,CIITA
IL-4 Signaling	5.66E00	1.23E-01		PIK3CD,HLA-DQA1,HLA-DQB1,HLA-DRB5,PIK3R1,IL2RG,PIK3C3,HLA-DRA,PIK3C2G
Leukocyte Extravasation Signaling	5.6E00	7.25E-02	3.162	NCF1,CLDN4,PIK3R1,THY1,RAC2,VAV1,CXCR4,PIK3CD,SELPLG,ARHGAP4,ITGA4,CYBA,PIK3C2G,PIK3C3
Dendritic Cell Maturation	5.52E00	7.69E-02		HLA-DQA1,HLA-DQB1,COL1A2,B2M,COL1A1,PIK3R1,HLA-DRA,IRF8,PIK3CD,HLA-DRB5,PLCH2,PIK3C2G,PIK3C3
Role of JAK1 and JAK3 in γc Cytokine Signaling	5.35E00	1.33E-01		PIK3CD,IL2RB,BLNK,FES,PIK3R1,IL2RG,PIK3C3,PIK3C2G
Production of Nitric Oxide and Reactive Oxygen Species in Macrophages	5.25E00	7.26E-02	2.496	JUN,APOD,NCF1,PIK3R1,IRF8,PIK3CD,CLU,CAT,PPP1R3A,CYBA,PIK3C2G,PIK3C3,ALB
Virus Entry via Endocytic Pathways	4.94E00	1.01E-01		PIK3CD,ITGB6,ITGA4,B2M,PIK3R1,RAC2,PIK3C3,PIK3C2G,ITGB7
Role of NFAT in Regulation of the Immune Response	4.87E00	7.23E-02	2.646	JUN,LCP2,ITPR2,PIK3CD,HLA-DQA1,HLA-DQB1,HLA-DRB5,BLNK,PIK3R1,PIK3C3,HLA-DRA,PIK3C2G
IL-2 Signaling	4.72E00	1.32E-01	2.449	JUN,PIK3CD,IL2RB,PIK3R1,IL2RG,PIK3C3,PIK3C2G
IL-12 Signaling and Production in Macrophages	4.35E00	7.63E-02		JUN,ALOX12,IRF8,PIK3CD,CLU,APOD,PIK3R1,PIK3C3,PIK3C2G,ALB
Renin-Angiotensin Signaling	4.26E00	8.33E-02	3.000	JUN,AGT,ITPR2,PIK3CD,CCL5,ADCY7,PIK3R1,PIK3C3,PIK3C2G
B Cell Development	4.16E00	1.79E-01		HLA-DQA1,HLA-DQB1,HLA-DRB5,PTPRC,HLA-DRA
Acute Phase Response Signaling	4.11E00	6.55E-02	0.333	JUN,AGT,C4A/C4B,CFB,PIK3CD,SERPINA3,PIK3R1,AMBP,ITIH2,ALB,TTR
Macropinocytosis Signaling	4.01E00	1.03E-01	2.000	PIK3CD,ITGB6,CD14,PIK3R1,PIK3C3,PIK3C2G,ITGB7
Fcγ Receptor-mediated Phagocytosis in Macrophages and Monocytes	3.95E00	8.6E-02	2.828	LCP2,NAPEPLD,NCF1,FYB,PIK3R1,RAC2,VAV1,PIK3C2G
Atherosclerosis Signaling	3.91E00	7.5E-02		CXCR4,ALOX12,CLU,APOD,SELPLG,COL1A2,ITGA4,COL1A1,ALB
Nicotine Degradation II	3.88E00	1.2E-01		FMO5,CYP3A7,UGT2B7,UGT2B10,CYP2S1,CYP1B1
Actin Cytoskeleton Signaling	3.87E00	5.71E-02		PIK3CD,CD14,NCKAP1L,TIAM1,ITGA4,PIK3R1,RAC2,ARHGEF4,PFN2,VAV1,PIK3C3,PIK3C2G
T Cell Receptor Signaling	3.85E00	8.33E-02		JUN,LCP2,PIK3CD,PTPRC,PIK3R1,VAV1,PIK3C3,PIK3C2G
Amyotrophic Lateral Sclerosis Signaling	3.82E00	8.25E-02		GLUL,PIK3CD,CAPN6,CAT,SLC1A2,PIK3R1,PIK3C3,PIK3C2G
IL-9 Signaling	3.74E00	1.47E-01	2.236	PIK3CD,PIK3R1,IL2RG,PIK3C3,PIK3C2G
OX40 Signaling Pathway	3.69E00	1.11E-01		JUN,HLA-DQA1,HLA-DQB1,HLA-DRB5,B2M,HLA-DRA
Complement System	3.62E00	1.39E-01	0.000	C4A/C4B,CFB,CFI,CFD,C3AR1
EGF Signaling	3.6E00	1.07E-01	2.449	JUN,ITPR2,PIK3CD,PIK3R1,PIK3C3,PIK3C2G
Reelin Signaling in Neurons	3.6E00	8.86E-02		PIK3CD,ITGA4,PIK3R1,PAFAH1B3,ARHGEF4,PIK3C3,PIK3C2G
Endothelin-1 Signaling	3.48E00	5.99E-02	2.530	JUN,ITPR2,PIK3CD,NAPEPLD,ADCY7,EDN1,PLCH2,PIK3R1,PIK3C3,PIK3C2G
B Cell Receptor Signaling	3.39E00	5.85E-02		JUN,PIK3CD,PTPRC,EGR1,BLNK,PIK3R1,RAC2,VAV1,PIK3C3,PIK3C2G
Estrogen-Dependent Breast Cancer Signaling	3.36E00	9.68E-02		JUN,IGF1R,PIK3CD,PIK3R1,PIK3C3,PIK3C2G
FcγRIIB Signaling in B Lymphocytes	3.35E00	1.22E-01	2.236	PIK3CD,BLNK,PIK3R1,PIK3C3,PIK3C2G
NRF2-mediated Oxidative Stress Response	3.28E00	5.65E-02	2.236	JUN,PIK3CD,ABCC2,CAT,EPHX1,PIK3R1,GPX2,MGST1,PIK3C3,PIK3C2G
IL-15 Signaling	3.22E00	9.09E-02		PIK3CD,IL2RB,PIK3R1,IL2RG,PIK3C3,PIK3C2G
Role of Pattern Recognition Receptors in Recognition of Bacteria and Viruses	3.21E00	6.72E-02	2.449	PIK3CD,CCL5,OAS2,DDX58,PIK3R1,PIK3C3,PIK3C2G,C3AR1
Nicotine Degradation III	3.2E00	1.14E-01		CYP3A7,UGT2B7,UGT2B10,CYP2S1,CYP1B1
T Helper Cell Differentiation	3.18E00	8.96E-02		HLA-DQA1,HLA-DQB1,HLA-DRB5,ICOSLG/LOC102723996,IL2RG,HLA-DRA
CXCR4 Signaling	3.17E00	5.96E-02	2.333	JUN,ITPR2,CXCR4,PIK3CD,ADCY7,EGR1,PIK3R1,PIK3C3,PIK3C2G
LXR/RXR Activation	3.17E00	6.61E-02	0.000	AGT,C4A/C4B,CD14,CLU,APOD,AMBP,ALB,TTR
GDNF Family Ligand-Receptor Interactions	3.15E00	8.82E-02	2.236	JUN,ITPR2,PIK3CD,PIK3R1,PIK3C3,PIK3C2G
PI3K Signaling in B Lymphocytes	3.12E00	6.5E-02		JUN,ITPR2,PIK3CD,PLCH2,PTPRC,BLNK,PIK3R1,VAV1
Xenobiotic Metabolism Signaling	3.09E00	4.69E-02		FMO5,PIK3CD,CYP3A7,ABCC2,UGT2B7,UGT2B10,CAT,PIK3R1,MGST1,CYP1B1,PIK3C3,PIK3C2G
FXR/RXR Activation	3.07E00	6.4E-02		AGT,C4A/C4B,ABCC2,CLU,APOD,AMBP,ALB,TTR
Melatonin Degradation I	3.07E00	1.06E-01		CYP3A7,UGT2B7,UGT2B10,CYP2S1,CYP1B1
Allograft Rejection Signaling	3.03E00	1.04E-01		HLA-DQA1,HLA-DQB1,HLA-DRB5,B2M,HLA-DRA
Ephrin A Signaling	3.03E00	1.04E-01		PIK3CD,PIK3R1,VAV1,PIK3C3,PIK3C2G
Paxillin Signaling	3E00	7.07E-02	2.236	PIK3CD,ITGB6,ITGA4,PIK3R1,PIK3C3,PIK3C2G,ITGB7
Cdc42 Signaling	2.98E00	6.2E-02		JUN,HLA-DQA1,HLA-DQB1,HLA-DRB5,ITGA4,B2M,VAV1,HLA-DRA
LPS-stimulated MAPK Signaling	2.98E00	8.22E-02	2.449	JUN,PIK3CD,CD14,PIK3R1,PIK3C3,PIK3C2G
Leptin Signaling in Obesity	2.98E00	8.22E-02		PIK3CD,ADCY7,PLCH2,PIK3R1,PIK3C3,PIK3C2G
HIF1α Signaling	2.98E00	7E-02		JUN,PIK3CD,EDN1,PIK3R1,PIK3C3,PIK3C2G,SLC2A5
Role of p14/p19ARF in Tumor Suppression	2.97E00	1.38E-01	-2.000	PIK3CD,PIK3R1,PIK3C3,PIK3C2G
Integrin Signaling	2.95E00	5.13E-02	3.000	PIK3CD,TSPAN1,ITGB6,CAPN6,ITGA4,PIK3R1,RAC2,PIK3C3,PIK3C2G,ITGB7
Rac Signaling	2.9E00	6.8E-02	2.646	JUN,PIK3CD,TIAM1,ITGA4,PIK3R1,PIK3C3,PIK3C2G
HER-2 Signaling in Breast Cancer	2.89E00	7.89E-02		PIK3CD,ITGB6,PIK3R1,PIK3C3,PIK3C2G,ITGB7
Superpathway of Melatonin Degradation	2.87E00	9.62E-02		CYP3A7,UGT2B7,UGT2B10,CYP2S1,CYP1B1
UVB-Induced MAPK Signaling	2.83E00	9.43E-02	2.236	JUN,PIK3CD,PIK3R1,PIK3C3,PIK3C2G
Role of IL-17A in Arthritis	2.79E00	9.26E-02		PIK3CD,CCL5,PIK3R1,PIK3C3,PIK3C2G
Natural Killer Cell Signaling	2.78E00	6.48E-02		LCP2,PIK3CD,PIK3R1,RAC2,VAV1,PIK3C3,PIK3C2G
Fc Epsilon RI Signaling	2.76E00	6.42E-02	2.646	LCP2,PIK3CD,PIK3R1,RAC2,VAV1,PIK3C3,PIK3C2G
Thrombopoietin Signaling	2.76E00	9.09E-02	2.236	JUN,PIK3CD,PIK3R1,PIK3C3,PIK3C2G
Altered T Cell and B Cell Signaling in Rheumatoid Arthritis	2.75E00	7.41E-02		CXCL13,HLA-DQA1,HLA-DQB1,HLA-DRB5,SPP1,HLA-DRA
ErbB2-ErbB3 Signaling	2.72E00	8.93E-02	2.000	JUN,PIK3CD,PIK3R1,PIK3C3,PIK3C2G
Calcium-induced T Lymphocyte Apoptosis	2.66E00	8.62E-02	2.236	ITPR2,HLA-DQA1,HLA-DQB1,HLA-DRB5,HLA-DRA
Myc Mediated Apoptosis Signaling	2.66E00	8.62E-02		IGF1R,PIK3CD,PIK3R1,PIK3C3,PIK3C2G
TR/RXR Activation	2.64E00	7.06E-02		UCP2,PIK3CD,SYT12,PIK3R1,PIK3C3,PIK3C2G
FAK Signaling	2.62E00	6.98E-02		PIK3CD,CAPN6,ITGA4,PIK3R1,PIK3C3,PIK3C2G
IL-6 Signaling	2.61E00	6.03E-02	2.236	JUN,PIK3CD,CD14,COL1A1,PIK3R1,PIK3C3,PIK3C2G
CTLA4 Signaling in Cytotoxic T Lymphocytes	2.59E00	6.9E-02		LCP2,PIK3CD,B2M,PIK3R1,PIK3C3,PIK3C2G
UVA-Induced MAPK Signaling	2.59E00	6.9E-02	2.236	JUN,PIK3CD,PLCH2,PIK3R1,PIK3C3,PIK3C2G
Clathrin-mediated Endocytosis Signaling	2.57E00	4.89E-02		PIK3CD,ITGB6,CLU,APOD,PIK3R1,PIK3C3,PIK3C2G,ALB,ITGB7
p70S6K Signaling	2.56E00	5.93E-02	2.646	AGT,PIK3CD,PLCH2,PIK3R1,IL2RG,PIK3C3,PIK3C2G
P2Y Purigenic Receptor Signaling Pathway	2.56E00	5.93E-02	2.646	JUN,PIK3CD,ADCY7,PLCH2,PIK3R1,PIK3C3,PIK3C2G
Role of PI3K/AKT Signaling in the Pathogenesis of Influenza	2.56E00	8.2E-02		PIK3CD,CCL5,PIK3R1,PIK3C3,PIK3C2G
Docosahexaenoic Acid (DHA) Signaling	2.49E00	1.03E-01		PIK3CD,PIK3R1,PIK3C3,PIK3C2G
CD40 Signaling	2.47E00	7.81E-02	2.236	JUN,PIK3CD,PIK3R1,PIK3C3,PIK3C2G
IL-17A Signaling in Airway Cells	2.47E00	7.81E-02		PIK3CD,PIK3R1,MUC5AC,PIK3C3,PIK3C2G
SAPK/JNK Signaling	2.45E00	6.45E-02	2.449	JUN,PIK3CD,PIK3R1,RAC2,PIK3C3,PIK3C2G
Non-Small Cell Lung Cancer Signaling	2.44E00	7.69E-02	2.236	ITPR2,PIK3CD,PIK3R1,PIK3C3,PIK3C2G
Hepatic Fibrosis / Hepatic Stellate Cell Activation	2.39E00	4.59E-02		IGF1R,COL6A6,AGT,CCL5,CD14,EDN1,COL27A1,COL1A2,COL1A1
Erythropoietin Signaling	2.38E00	7.46E-02		JUN,PIK3CD,PIK3R1,PIK3C3,PIK3C2G
Neurotrophin/TRK Signaling	2.38E00	7.46E-02	2.236	JUN,PIK3CD,PIK3R1,PIK3C3,PIK3C2G
Telomerase Signaling	2.38E00	6.25E-02	2.449	PIK3CD,IL2RB,PIK3R1,IL2RG,PIK3C3,PIK3C2G
Melanoma Signaling	2.37E00	9.52E-02		PIK3CD,PIK3R1,PIK3C3,PIK3C2G
Autoimmune Thyroid Disease Signaling	2.37E00	9.52E-02		HLA-DQA1,HLA-DQB1,HLA-DRB5,HLA-DRA
IGF-1 Signaling	2.36E00	6.19E-02	2.449	JUN,IGF1R,PIK3CD,PIK3R1,PIK3C3,PIK3C2G
p53 Signaling	2.33E00	6.12E-02	-1.633	JUN,PIK3CD,THBS1,PIK3R1,PIK3C3,PIK3C2G
Growth Hormone Signaling	2.33E00	7.25E-02	2.000	IGF1R,PIK3CD,PIK3R1,PIK3C3,PIK3C2G
Renal Cell Carcinoma Signaling	2.33E00	7.25E-02	2.236	JUN,PIK3CD,PIK3R1,PIK3C3,PIK3C2G
Neuropathic Pain Signaling In Dorsal Horn Neurons	2.31E00	6.06E-02	2.449	ITPR2,PIK3CD,PLCH2,PIK3R1,PIK3C3,PIK3C2G
Graft-versus-Host Disease Signaling	2.3E00	9.09E-02		HLA-DQA1,HLA-DQB1,HLA-DRB5,HLA-DRA
IL-3 Signaling	2.27E00	7.04E-02		JUN,PIK3CD,PIK3R1,PIK3C3,PIK3C2G
Caveolar-mediated Endocytosis Signaling	2.25E00	6.94E-02		ITGB6,ITGA4,B2M,ALB,ITGB7
IL-17 Signaling	2.25E00	6.94E-02		JUN,PIK3CD,PIK3R1,PIK3C3,PIK3C2G
JAK/Stat Signaling	2.25E00	6.94E-02	2.236	JUN,PIK3CD,PIK3R1,PIK3C3,PIK3C2G
Primary Immunodeficiency Signaling	2.23E00	8.7E-02		PTPRC,BLNK,IL2RG,CIITA
MSP-RON Signaling Pathway	2.23E00	8.7E-02		PIK3CD,PIK3R1,PIK3C3,PIK3C2G
NF-κB Activation by Viruses	2.22E00	6.85E-02	2.236	PIK3CD,ITGA4,PIK3R1,PIK3C3,PIK3C2G
Prolactin Signaling	2.22E00	6.85E-02	2.236	JUN,PIK3CD,PIK3R1,PIK3C3,PIK3C2G
LPS/IL-1 Mediated Inhibition of RXR Function	2.22E00	4.33E-02	0.000	JUN,HMGCS2,FMO5,CYP3A7,ABCC2,CD14,CAT,PAPSS2,MGST1
HGF Signaling	2.21E00	5.77E-02	2.449	JUN,PIK3CD,ITGA4,PIK3R1,PIK3C3,PIK3C2G
Bupropion Degradation	2.21E00	1.25E-01		CYP3A7,CYP2S1,CYP1B1
Acetone Degradation I (to Methylglyoxal)	2.16E00	1.2E-01		CYP3A7,CYP2S1,CYP1B1
Role of NFAT in Cardiac Hypertrophy	2.15E00	4.55E-02	2.828	IGF1R,ITPR2,PIK3CD,ADCY7,PLCH2,PIK3R1,PIK3C3,PIK3C2G
fMLP Signaling in Neutrophils	2.15E00	5.61E-02	2.449	ITPR2,PIK3CD,NCF1,PIK3R1,PIK3C3,PIK3C2G
Role of Osteoblasts, Osteoclasts and Chondrocytes in Rheumatoid Arthritis	2.14E00	4.21E-02		JUN,SFRP5,PIK3CD,SFRP1,COL1A1,PIK3R1,SPP1,PIK3C3,PIK3C2G
Sphingosine-1-phosphate Signaling	2.13E00	5.56E-02	1.633	PIK3CD,ADCY7,PLCH2,PIK3R1,PIK3C3,PIK3C2G
CNTF Signaling	2.13E00	8.16E-02	2.000	PIK3CD,PIK3R1,PIK3C3,PIK3C2G
VDR/RXR Activation	2.13E00	6.49E-02		CCL5,S100G,CD14,SEMA3B,SPP1
PDGF Signaling	2.13E00	6.49E-02	2.236	JUN,PIK3CD,PIK3R1,PIK3C3,PIK3C2G
ILK Signaling	2.08E00	4.42E-02	2.828	JUN,PIK3CD,ITGB6,FBLIM1,PIK3R1,PIK3C3,PIK3C2G,ITGB7
Glioblastoma Multiforme Signaling	2.08E00	4.83E-02	2.646	IGF1R,ITPR2,PIK3CD,PLCH2,PIK3R1,PIK3C3,PIK3C2G
Gαq Signaling	2.08E00	4.83E-02	1.890	ITPR2,PIK3CD,NAPEPLD,RGS2,PIK3R1,PIK3C3,PIK3C2G
Cardiac Hypertrophy Signaling	2.07E00	4.09E-02	3.000	JUN,IGF1R,PIK3CD,ADCY7,PLCH2,ADRA2A,PIK3R1,PIK3C3,PIK3C2G
Nur77 Signaling in T Lymphocytes	2.07E00	7.84E-02		HLA-DQA1,HLA-DQB1,HLA-DRB5,HLA-DRA
Ceramide Signaling	2.06E00	6.25E-02	-1.342	JUN,PIK3CD,PIK3R1,PIK3C3,PIK3C2G
Endometrial Cancer Signaling	2.04E00	7.69E-02		PIK3CD,PIK3R1,PIK3C3,PIK3C2G
Thrombin Signaling	2E00	4.28E-02	2.121	ITPR2,PIK3CD,ADCY7,PLCH2,PIK3R1,ARHGEF4,PIK3C3,PIK3C2G
Gap Junction Signaling	1.99E00	4.64E-02		ITPR2,PIK3CD,ADCY7,PLCH2,PIK3R1,PIK3C3,PIK3C2G
14-3-3-mediated Signaling	1.99E00	5.17E-02		JUN,PIK3CD,PLCH2,PIK3R1,PIK3C3,PIK3C2G
Lymphotoxin β Receptor Signaling	1.98E00	7.41E-02	2.000	PIK3CD,PIK3R1,PIK3C3,PIK3C2G
Melanocyte Development and Pigmentation Signaling	1.97E00	5.95E-02	2.236	PIK3CD,ADCY7,PIK3R1,PIK3C3,PIK3C2G
Gα12/13 Signaling	1.97E00	5.13E-02	2.449	JUN,PIK3CD,PIK3R1,VAV1,PIK3C3,PIK3C2G
Breast Cancer Regulation by Stathmin1	1.96E00	4.21E-02		ITPR2,PIK3CD,ADCY7,PIK3R1,PPP1R3A,ARHGEF4,PIK3C3,PIK3C2G
ErbB Signaling	1.95E00	5.88E-02		JUN,PIK3CD,PIK3R1,PIK3C3,PIK3C2G
RANK Signaling in Osteoclasts	1.93E00	5.81E-02		JUN,PIK3CD,PIK3R1,PIK3C3,PIK3C2G
Glioma Invasiveness Signaling	1.9E00	7.02E-02	2.000	PIK3CD,PIK3R1,PIK3C3,PIK3C2G
PAK Signaling	1.89E00	5.68E-02	2.236	PIK3CD,ITGA4,PIK3R1,PIK3C3,PIK3C2G
ErbB4 Signaling	1.88E00	6.9E-02	2.000	PIK3CD,PIK3R1,PIK3C3,PIK3C2G
Antiproliferative Role of Somatostatin Receptor 2	1.83E00	6.67E-02	2.000	PIK3CD,PIK3R1,PIK3C3,PIK3C2G
Chronic Myeloid Leukemia Signaling	1.81E00	5.43E-02		PIK3CD,MECOM,PIK3R1,PIK3C3,PIK3C2G
Thiamin Salvage III	1.8E00	1E00		TPK1
Glutamine Biosynthesis I	1.8E00	1E00		GLUL
Granulocyte Adhesion and Diapedesis	1.79E00	4.24E-02		CXCR4,CCL5,CXCL13,SELPLG,CLDN4,ITGA4,THY1
GM-CSF Signaling	1.78E00	6.45E-02	2.000	PIK3CD,PIK3R1,PIK3C3,PIK3C2G
Glioma Signaling	1.78E00	5.32E-02	2.236	IGF1R,PIK3CD,PIK3R1,PIK3C3,PIK3C2G
Nitric Oxide Signaling in the Cardiovascular System	1.76E00	5.26E-02	2.236	ITPR2,PIK3CD,PIK3R1,PIK3C3,PIK3C2G
PXR/RXR Activation	1.75E00	6.35E-02		HMGCS2,CYP3A7,ABCC2,PAPSS2
CREB Signaling in Neurons	1.74E00	4.14E-02	2.646	ITPR2,PIK3CD,ADCY7,PLCH2,PIK3R1,PIK3C3,PIK3C2G
Axonal Guidance Signaling	1.73E00	3.05E-02		SEMA4G,SEMA3B,PIK3R1,RAC2,CXCR4,PIK3CD,PLCH2,ITGA4,FES,PFN2,PIK3C2G,L1CAM,PIK3C3
Relaxin Signaling	1.73E00	4.55E-02		JUN,PIK3CD,ADCY7,PIK3R1,PIK3C3,PIK3C2G
Estrogen Biosynthesis	1.72E00	8.33E-02		CYP3A7,CYP2S1,CYP1B1
Angiopoietin Signaling	1.71E00	6.15E-02		PIK3CD,PIK3R1,PIK3C3,PIK3C2G
Colanic Acid Building Blocks Biosynthesis	1.7E00	1.43E-01		PMM1,GMDS
eNOS Signaling	1.69E00	4.44E-02	2.236	ITPR2,PIK3CD,ADCY7,PIK3R1,PIK3C3,PIK3C2G
Agranulocyte Adhesion and Diapedesis	1.67E00	4E-02		CXCR4,CCL5,CXCL13,SELPLG,CLDN4,ITGA4,ITGB7
Chemokine Signaling	1.65E00	5.88E-02	2.000	JUN,CXCR4,CCL5,PIK3C2G
FLT3 Signaling in Hematopoietic Progenitor Cells	1.58E00	5.63E-02		PIK3CD,PIK3R1,PIK3C3,PIK3C2G
Small Cell Lung Cancer Signaling	1.58E00	5.63E-02		PIK3CD,PIK3R1,PIK3C3,PIK3C2G
PEDF Signaling	1.58E00	5.63E-02	2.000	PIK3CD,PIK3R1,PIK3C3,PIK3C2G
Pancreatic Adenocarcinoma Signaling	1.58E00	4.72E-02	2.236	PIK3CD,NAPEPLD,PIK3R1,PIK3C3,PIK3C2G
IL-8 Signaling	1.57E00	3.83E-02	2.646	JUN,PIK3CD,NAPEPLD,PIK3R1,RAC2,PIK3C3,PIK3C2G
MIF Regulation of Innate Immunity	1.57E00	7.32E-02		JUN,CD74,CD14
Role of Tissue Factor in Cancer	1.56E00	4.67E-02		PIK3CD,EGR1,PIK3R1,PIK3C3,PIK3C2G
ERK/MAPK Signaling	1.54E00	3.76E-02	1.890	PIK3CD,ITGA4,PIK3R1,PPP1R3A,RAC2,PIK3C3,PIK3C2G
Glutathione Redox Reactions I	1.54E00	1.18E-01		GPX2,MGST1
3-phosphoinositide Biosynthesis	1.53E00	4.08E-02		PIK3CD,PTPRC,PIK3R1,PIK3C3,PIK3C2G,CILP
Taurine Biosynthesis	1.5E00	5E-01		CDO1
Sulfate Activation for Sulfonation	1.5E00	5E-01		PAPSS2
GDP-L-fucose Biosynthesis I (from GDP-D-mannose)	1.5E00	5E-01		GMDS
Acute Myeloid Leukemia Signaling	1.49E00	5.26E-02	2.000	PIK3CD,PIK3R1,PIK3C3,PIK3C2G
VEGF Family Ligand-Receptor Interactions	1.49E00	5.26E-02	2.000	PIK3CD,PIK3R1,PIK3C3,PIK3C2G
Signaling by Rho Family GTPases	1.49E00	3.43E-02	2.828	JUN,PIK3CD,KIAA1804,ITGA4,PIK3R1,ARHGEF4,PIK3C3,PIK3C2G
Aldosterone Signaling in Epithelial Cells	1.48E00	3.97E-02		ITPR2,PIK3CD,PLCH2,PIK3R1,PIK3C3,PIK3C2G
CCR3 Signaling in Eosinophils	1.47E00	4.42E-02		ITPR2,PIK3CD,PIK3R1,PIK3C3,PIK3C2G
Germ Cell-Sertoli Cell Junction Signaling	1.42E00	3.85E-02		LAMC3,PIK3CD,PIK3R1,RAC2,PIK3C3,PIK3C2G
Tec Kinase Signaling	1.42E00	3.85E-02	2.449	PIK3CD,ITGA4,PIK3R1,VAV1,PIK3C3,PIK3C2G
Prostate Cancer Signaling	1.42E00	5E-02		PIK3CD,PIK3R1,PIK3C3,PIK3C2G
Role of Macrophages, Fibroblasts and Endothelial Cells in Rheumatoid Arthritis	1.4E00	3.14E-02		JUN,SFRP5,PIK3CD,CCL5,SFRP1,PLCH2,PIK3R1,PIK3C3,PIK3C2G
HMGB1 Signaling	1.4E00	4.24E-02	2.236	JUN,PIK3CD,PIK3R1,PIK3C3,PIK3C2G
PTEN Signaling	1.4E00	4.24E-02	-1.342	IGF1R,PIK3CD,ITGA4,PIK3R1,RAC2
Communication between Innate and Adaptive Immune Cells	1.39E00	4.88E-02		CCL5,HLA-DRB5,B2M,HLA-DRA
FGF Signaling	1.34E00	4.71E-02	2.000	PIK3CD,PIK3R1,PIK3C3,PIK3C2G
G-Protein Coupled Receptor Signaling	1.31E00	3.15E-02		PIK3CD,ADCY7,GABBR1,RGS2,ADRA2A,PIK3R1,PIK3C3,PIK3C2G
Crosstalk between Dendritic Cells and Natural Killer Cells	1.28E00	4.49E-02		HLA-DRB5,IL2RB,IL2RG,HLA-DRA
VEGF Signaling	1.28E00	4.49E-02	2.000	PIK3CD,PIK3R1,PIK3C3,PIK3C2G
Insulin Receptor Signaling	1.28E00	3.91E-02		PIK3CD,PIK3R1,PPP1R3A,PIK3C3,PIK3C2G
Ovarian Cancer Signaling	1.25E00	3.85E-02		PIK3CD,EDN1,PIK3R1,PIK3C3,PIK3C2G
AMPK Signaling	1.23E00	3.79E-02	2.236	PIK3CD,ADRA2A,PIK3R1,PIK3C3,PIK3C2G
IL-17A Signaling in Gastric Cells	1.23E00	8E-02		JUN,CCL5
Glutathione-mediated Detoxification	1.23E00	8E-02		ANPEP,MGST1
Arsenate Detoxification I (Glutaredoxin)	1.21E00	2.5E-01		AS3MT
Creatine-phosphate Biosynthesis	1.21E00	2.5E-01		CKB
L-cysteine Degradation I	1.21E00	2.5E-01		CDO1
Mouse Embryonic Stem Cell Pluripotency	1.21E00	4.26E-02	2.000	PIK3CD,PIK3R1,PIK3C3,PIK3C2G
Thyroid Hormone Metabolism II (via Conjugation and/or Degradation)	1.2E00	7.69E-02		UGT2B7,UGT2B10
Huntington's Disease Signaling	1.17E00	3.1E-02		JUN,IGF1R,PIK3CD,CAPN6,PIK3R1,PIK3C3,PIK3C2G
Intrinsic Prothrombin Activation Pathway	1.14E00	7.14E-02		COL1A2,COL1A1
Superpathway of Inositol Phosphate Compounds	1.14E00	3.26E-02		PIK3CD,PTPRC,PIK3R1,PIK3C3,PIK3C2G,CILP
Phospholipase C Signaling	1.13E00	3.03E-02	2.000	LCP2,ITPR2,NAPEPLD,ADCY7,ITGA4,BLNK,ARHGEF4
Regulation of eIF4 and p70S6K Signaling	1.12E00	3.52E-02	2.236	PIK3CD,ITGA4,PIK3R1,PIK3C3,PIK3C2G
Type I Diabetes Mellitus Signaling	1.06E00	3.77E-02		HLA-DQA1,HLA-DQB1,HLA-DRB5,HLA-DRA
NGF Signaling	1.06E00	3.77E-02	2.000	PIK3CD,PIK3R1,PIK3C3,PIK3C2G
Agrin Interactions at Neuromuscular Junction	1.05E00	4.48E-02		JUN,ITGA4,RAC2
Inhibition of Angiogenesis by TSP1	1.04E00	6.25E-02		JUN,THBS1
Superoxide Radicals Degradation	1.04E00	1.67E-01		CAT
GDP-mannose Biosynthesis	1.04E00	1.67E-01		PMM1
Role of NANOG in Mammalian Embryonic Stem Cell Pluripotency	1.02E00	3.67E-02	2.000	PIK3CD,PIK3R1,PIK3C3,PIK3C2G
MIF-mediated Glucocorticoid Regulation	1.02E00	6.06E-02		CD74,CD14
GPCR-Mediated Integration of Enteroendocrine Signaling Exemplified by an L Cell	1E00	4.29E-02		ITPR2,ADCY7,PLCH2
Hereditary Breast Cancer Signaling	9.91E-01	3.57E-02		PIK3CD,PIK3R1,PIK3C3,PIK3C2G
Dopamine-DARPP32 Feedback in cAMP Signaling	9.83E-01	3.18E-02	0.447	ITPR2,ADCY7,PLCH2,KCNJ15,PPP1R3A
Type II Diabetes Mellitus Signaling	9.71E-01	3.51E-02		PIK3CD,PIK3R1,PIK3C3,PIK3C2G
Ephrin B Signaling	9.63E-01	4.11E-02		CXCR4,RAC2,VAV1
Systemic Lupus Erythematosus Signaling	9.54E-01	2.9E-02		JUN,PIK3CD,PTPRC,PIK3R1,PIK3C3,PIK3C2G
Notch Signaling	9.36E-01	5.41E-02		DTX3,FURIN
Glucocorticoid Receptor Signaling	9.35E-01	2.71E-02		JUN,AGT,PIK3CD,CCL5,PIK3R1,PIK3C3,PIK3C2G
Molecular Mechanisms of Cancer	9.3E-01	2.51E-02		JUN,PIK3CD,ADCY7,ITGA4,PIK3R1,RAC2,ARHGEF4,PIK3C3,PIK3C2G
NF-κB Signaling	8.84E-01	2.96E-02	2.236	IGF1R,PIK3CD,PIK3R1,PIK3C3,PIK3C2G
Neuroprotective Role of THOP1 in Alzheimer's Disease	8.81E-01	5E-02		AGT,SERPINA3
Pathogenesis of Multiple Sclerosis	8.74E-01	1.11E-01		CCL5
Prostanoid Biosynthesis	8.74E-01	1.11E-01		TBXAS1
GNRH Signaling	8.47E-01	3.15E-02	2.000	JUN,ITPR2,ADCY7,EGR1
GPCR-Mediated Nutrient Sensing in Enteroendocrine Cells	8.41E-01	3.61E-02		ITPR2,ADCY7,PLCH2
Ketogenesis	8.32E-01	1E-01		HMGCS2
iNOS Signaling	8.3E-01	4.65E-02		JUN,CD14
α-Adrenergic Signaling	8.19E-01	3.53E-02		ITPR2,ADCY7,ADRA2A
Human Embryonic Stem Cell Pluripotency	8.12E-01	3.05E-02		PIK3CD,PIK3R1,PIK3C3,PIK3C2G
Regulation of Actin-based Motility by Rho	7.98E-01	3.45E-02		ITGA4,RAC2,PFN2
Colorectal Cancer Metastasis Signaling	7.94E-01	2.6E-02	2.449	JUN,PIK3CD,ADCY7,PIK3R1,PIK3C3,PIK3C2G
mTOR Signaling	7.9E-01	2.75E-02	2.236	PIK3CD,NAPEPLD,PIK3R1,PIK3C3,PIK3C2G
Regulation of the Epithelial-Mesenchymal Transition Pathway	7.9E-01	2.75E-02		PIK3CD,EGR1,PIK3R1,PIK3C3,PIK3C2G
Mevalonate Pathway I	7.59E-01	8.33E-02		HMGCS2
Antioxidant Action of Vitamin C	7.3E-01	3.19E-02		NAPEPLD,PLCH2,SLC2A5
Chondroitin Sulfate Degradation (Metazoa)	7.28E-01	7.69E-02		GM2A
Choline Biosynthesis III	7.28E-01	7.69E-02		NAPEPLD
Bile Acid Biosynthesis, Neutral Pathway	7.28E-01	7.69E-02		AKR1D1
Guanosine Nucleotides Degradation III	7.28E-01	7.69E-02		NT5E
Serotonin Degradation	7.02E-01	3.85E-02		UGT2B7,UGT2B10
Urate Biosynthesis/Inosine 5'-phosphate Degradation	6.99E-01	7.14E-02		NT5E
Dermatan Sulfate Degradation (Metazoa)	6.99E-01	7.14E-02		GM2A
CDK5 Signaling	6.94E-01	3.06E-02		ADCY7,EGR1,PPP1R3A
Phospholipases	6.77E-01	3.7E-02		NAPEPLD,PLCH2
γ-glutamyl Cycle	6.72E-01	6.67E-02		ANPEP
Regulation of Cellular Mechanics by Calpain Protease	6.65E-01	3.64E-02		CAPN6,ITGA4
Glutamate Receptor Signaling	6.54E-01	3.57E-02		GLUL,SLC1A2
Adenosine Nucleotides Degradation II	6.47E-01	6.25E-02		NT5E
Superpathway of Geranylgeranyldiphosphate Biosynthesis I (via Mevalonate)	6.47E-01	6.25E-02		HMGCS2
Ethanol Degradation IV	6.24E-01	5.88E-02		CAT
ATM Signaling	6.21E-01	3.39E-02		JUN,SMC2
Corticotropin Releasing Hormone Signaling	6.2E-01	2.8E-02		JUN,ITPR2,ADCY7
Hepatic Cholestasis	6.18E-01	2.53E-02		JUN,ABCC2,CD14,ADCY7
Activation of IRF by Cytosolic Pattern Recognition Receptors	6.1E-01	3.33E-02		JUN,DDX58
Differential Regulation of Cytokine Production in Macrophages and T Helper Cells by IL-17A and IL-17F	6.03E-01	5.56E-02		CCL5
Eicosanoid Signaling	6E-01	3.28E-02		ALOX12,TBXAS1
PCP pathway	5.9E-01	3.23E-02		JUN,PFN2
Purine Nucleotides Degradation II (Aerobic)	5.83E-01	5.26E-02		NT5E
Hypoxia Signaling in the Cardiovascular System	5.8E-01	3.17E-02		JUN,EDN1
Wnt/β-catenin Signaling	5.71E-01	2.41E-02	-1.000	JUN,SFRP5,SOX9,SFRP1
DNA Methylation and Transcriptional Repression Signaling	5.64E-01	5E-02		CHD3
Synaptic Long Term Potentiation	5.56E-01	2.59E-02		ITPR2,PLCH2,PPP1R3A
GABA Receptor Signaling	5.52E-01	3.03E-02		ADCY7,GABBR1
NAD Salvage Pathway II	5.46E-01	4.76E-02		NT5E
CCR5 Signaling in Macrophages	5.43E-01	2.99E-02		JUN,CCL5
EIF2 Signaling	5.38E-01	2.33E-02	2.000	PIK3CD,PIK3R1,PIK3C3,PIK3C2G
RhoGDI Signaling	5.38E-01	2.33E-02	-1.000	ARHGAP4,ITGA4,ARHGEF4,ARHGDIB
Ephrin Receptor Signaling	5.38E-01	2.33E-02		CXCR4,ITGA4,RAC2,PIK3C2G
IL-10 Signaling	5.34E-01	2.94E-02		JUN,CD14
RAR Activation	5.33E-01	2.31E-02		JUN,PIK3CD,ADCY7,PIK3R1
RhoA Signaling	5.3E-01	2.5E-02		IGF1R,ARHGAP4,PFN2
Gαi Signaling	5.3E-01	2.5E-02		ADCY7,GABBR1,ADRA2A
TREM1 Signaling	5.26E-01	2.9E-02		NLRC5,CIITA
PI3K/AKT Signaling	5.23E-01	2.48E-02		PIK3CD,ITGA4,PIK3R1
Differential Regulation of Cytokine Production in Intestinal Epithelial Cells by IL-17A and IL-17F	5.13E-01	4.35E-02		CCL5
Cellular Effects of Sildenafil (Viagra)	5.05E-01	2.42E-02		ITPR2,ADCY7,PLCH2
Toll-like Receptor Signaling	5.01E-01	2.78E-02		JUN,CD14
Lipid Antigen Presentation by CD1	4.97E-01	4.17E-02		B2M
STAT3 Pathway	4.93E-01	2.74E-02		IGF1R,KIAA1804
Dopamine Receptor Signaling	4.63E-01	2.6E-02		ADCY7,PPP1R3A
Cell Cycle Control of Chromosomal Replication	4.56E-01	3.7E-02		MCM5
Superpathway of Cholesterol Biosynthesis	4.56E-01	3.7E-02		HMGCS2
Regulation of IL-2 Expression in Activated and Anergic T Lymphocytes	4.56E-01	2.56E-02		JUN,VAV1
Synaptic Long Term Depression	4.43E-01	2.22E-02		IGF1R,ITPR2,PLCH2
Aryl Hydrocarbon Receptor Signaling	4.43E-01	2.22E-02		JUN,MGST1,CYP1B1
TNFR2 Signaling	4.43E-01	3.57E-02		JUN
HIPPO signaling	4.09E-01	2.35E-02		AMOT,PPP1R3A
Cytotoxic T Lymphocyte-mediated Apoptosis of Target Cells	4.09E-01	3.23E-02		B2M
4-1BB Signaling in T Lymphocytes	4.09E-01	3.23E-02		JUN
Superpathway of Methionine Degradation	4.09E-01	3.23E-02		CDO1
Neuregulin Signaling	4.03E-01	2.33E-02		ITGA4,PIK3R1
IL-1 Signaling	3.73E-01	2.2E-02		JUN,ADCY7
Coagulation System	3.69E-01	2.86E-02		SERPINA5
IL-17A Signaling in Fibroblasts	3.69E-01	2.86E-02		JUN
cAMP-mediated signaling	3.5E-01	1.85E-02	1.000	ADCY7,GABBR1,RGS2,ADRA2A
April Mediated Signaling	3.42E-01	2.63E-02		JUN
Netrin Signaling	3.34E-01	2.56E-02		RAC2
B Cell Activating Factor Signaling	3.26E-01	2.5E-02		JUN
Transcriptional Regulatory Network in Embryonic Stem Cells	3.26E-01	2.5E-02		L1CAM
Cholecystokinin/Gastrin-mediated Signaling	3.22E-01	1.98E-02		JUN,ITPR2
Role of RIG1-like Receptors in Antiviral Innate Immunity	3.19E-01	2.44E-02		DDX58
Mechanisms of Viral Exit from Host Cells	3.19E-01	2.44E-02		VPS37C
Role of Hypercytokinemia/hyperchemokinemia in the Pathogenesis of Influenza	3.19E-01	2.44E-02		CCL5
PPARα/RXRα Activation	3.14E-01	1.82E-02		JUN,ADCY7,PLCH2
Mitochondrial Dysfunction	3.14E-01	1.82E-02		UCP2,CAT,FURIN
UVC-Induced MAPK Signaling	3.11E-01	2.38E-02		JUN
Tight Junction Signaling	3.1E-01	1.81E-02		JUN,TIAM1,CLDN4
Serotonin Receptor Signaling	3.04E-01	2.33E-02		ADCY7
Gαs Signaling	2.91E-01	1.85E-02		ADCY7,RGS2
Role of Oct4 in Mammalian Embryonic Stem Cell Pluripotency	2.9E-01	2.22E-02		SPP1
Sertoli Cell-Sertoli Cell Junction Signaling	2.86E-01	1.73E-02		JUN,CLDN4,ITGA4
nNOS Signaling in Neurons	2.84E-01	2.17E-02		CAPN6
TNFR1 Signaling	2.78E-01	2.13E-02		JUN
Sperm Motility	2.71E-01	1.77E-02		ITPR2,PLCH2
Cell Cycle: G2/M DNA Damage Checkpoint Regulation	2.66E-01	2.04E-02		TOP2A
Amyloid Processing	2.6E-01	2E-02		CAPN6
CD27 Signaling in Lymphocytes	2.54E-01	1.96E-02		JUN
Gustation Pathway	2.52E-01	1.69E-02		ITPR2,ADCY7
Semaphorin Signaling in Neurons	2.49E-01	1.92E-02		FES
D-myo-inositol (1,4,5,6)-Tetrakisphosphate Biosynthesis	2.45E-01	1.67E-02		PTPRC,CILP
D-myo-inositol (3,4,5,6)-tetrakisphosphate Biosynthesis	2.45E-01	1.67E-02		PTPRC,CILP
Wnt/Ca+ pathway	2.33E-01	1.82E-02		PLCH2
Actin Nucleation by ARP-WASP Complex	2.28E-01	1.79E-02		ITGA4
Induction of Apoptosis by HIV1	2.15E-01	1.69E-02		CXCR4

## Sheet: Canonical Pathways DOWN 3-fold
© 2000-2015 QIAGEN. All rights reserved.
Ingenuity Canonical Pathways	-log(p-value)	Ratio	z-score	Molecules
Triacylglycerol Degradation	4.09E00	1.67E-01		CEL,PNLIPRP2,PNLIPRP1,PNLIP
Glycine Degradation (Creatine Biosynthesis)	4.02E00	1E00		GAMT,GATM
Retinol Biosynthesis	3.7E00	1.33E-01		CEL,PNLIPRP2,PNLIPRP1,PNLIP
Serine Biosynthesis	3.03E00	4E-01		PSAT1,DUSP26
Superpathway of Serine and Glycine Biosynthesis I	2.71E00	2.86E-01		PSAT1,DUSP26
G-Protein Coupled Receptor Signaling	2.44E00	3.15E-02		FYN,PDE8B,PLCB4,P2RY14,VIPR1,RAP1GAP,PDE2A,PTGER3
cAMP-mediated signaling	2.26E00	3.24E-02	-2.449	PDE8B,P2RY14,VIPR1,RAP1GAP,CAMK1D,PDE2A,PTGER3
Threonine Degradation II	2.01E00	1E00		GCAT
Methionine Degradation I (to Homocysteine)	1.98E00	1.25E-01		MAT1A,AHCY
Heparan Sulfate Biosynthesis (Late Stages)	1.94E00	6.25E-02		CHST2,EXTL1,EXTL3
Cysteine Biosynthesis III (mammalia)	1.88E00	1.11E-01		MAT1A,AHCY
Maturity Onset Diabetes of Young (MODY) Signaling	1.79E00	1E-01		GCK,CACNA1A
Heparan Sulfate Biosynthesis	1.78E00	5.45E-02		CHST2,EXTL1,EXTL3
Polyamine Regulation in Colon Cancer	1.71E00	9.09E-02		MYC,ODC1
Putrescine Biosynthesis III	1.71E00	5E-01		ODC1
Glutamine Degradation I	1.71E00	5E-01		GLS2
Axonal Guidance Signaling	1.61E00	2.11E-02		PLXND1,FYN,NTN1,PLCB4,PGF,MKNK1,TUBA4A,ADAMTS7,BMP3
Gustation Pathway	1.54E00	3.39E-02		P2RX1,PDE8B,P2RY14,PDE2A
Trehalose Degradation II (Trehalase)	1.54E00	3.33E-01		GCK
S-adenosyl-L-methionine Biosynthesis	1.54E00	3.33E-01		MAT1A
Tyrosine Biosynthesis IV	1.54E00	3.33E-01		PCBD1
GPCR-Mediated Integration of Enteroendocrine Signaling Exemplified by an L Cell	1.5E00	4.29E-02		PLCB4,VIPR1,GAL
Cellular Effects of Sildenafil (Viagra)	1.47E00	3.23E-02		PLCB4,PDE2A,PABPC4,CACNA1A
ERK/MAPK Signaling	1.44E00	2.69E-02	-0.447	MYC,FYN,PPP1R14B,MKNK1,EIF4EBP1
Superpathway of Methionine Degradation	1.43E00	6.45E-02		MAT1A,AHCY
NAD Biosynthesis III	1.41E00	2.5E-01		NMNAT2
Phenylalanine Degradation I (Aerobic)	1.41E00	2.5E-01		PCBD1
VDR/RXR Activation	1.4E00	3.9E-02		SERPINB1,BGLAP,TRPV6
Cardiac β-adrenergic Signaling	1.39E00	3.03E-02	-1.000	PDE8B,PPP1R14B,PDE2A,CACNA1A
tRNA Splicing	1.34E00	5.71E-02		PDE8B,PDE2A
Protein Citrullination	1.32E00	2E-01		PADI2
NAD Salvage Pathway III	1.32E00	2E-01		NMNAT2
Lysine Degradation V	1.32E00	2E-01		PIPOX
Bladder Cancer Signaling	1.28E00	3.49E-02		MYC,FGF21,PGF
Thyroid Cancer Signaling	1.25E00	5.13E-02		MYC,KLK3
NAD Biosynthesis from 2-amino-3-carboxymuconate Semialdehyde	1.24E00	1.67E-01		NMNAT2
GDP-glucose Biosynthesis	1.24E00	1.67E-01		GCK
Role of Macrophages, Fibroblasts and Endothelial Cells in Rheumatoid Arthritis	1.2E00	2.09E-02		PRSS1,MYC,PLCB4,PRSS3,PGF,PRSS2
Glucose and Glucose-1-phosphate Degradation	1.18E00	1.43E-01		GCK
Nitric Oxide Signaling in the Cardiovascular System	1.18E00	3.16E-02		PGF,PDE2A,CACNA1A
Dopamine-DARPP32 Feedback in cAMP Signaling	1.16E00	2.55E-02	-1.000	PPP1R14B,PLCB4,CAMKK1,CACNA1A
Amyotrophic Lateral Sclerosis Signaling	1.16E00	3.09E-02		PGF,CASP9,CACNA1A
CDK5 Signaling	1.14E00	3.06E-02		PPP1R14B,MAPT,CACNA1A
Protein Kinase A Signaling	1.14E00	1.89E-02		PDE8B,PPP1R14B,NTN1,PLCB4,PDE2A,DUSP26,PTPRJ
Airway Pathology in Chronic Obstructive Pulmonary Disease	1.12E00	1.25E-01		CELA2A
Citrulline Biosynthesis	1.12E00	1.25E-01		GLS2
Calcium Transport I	1.07E00	1.11E-01		ATP2C2
UDP-N-acetyl-D-galactosamine Biosynthesis II	1.07E00	1.11E-01		GCK
Endometrial Cancer Signaling	1.04E00	3.85E-02		MYC,CASP9
Glycine Betaine Degradation	1.03E00	1E-01		PIPOX
Sperm Motility	1E00	2.65E-02		PLCB4,PDE2A,PTK7
14-3-3-mediated Signaling	9.77E-01	2.59E-02		PLCB4,TUBA4A,MAPT
p38 MAPK Signaling	9.68E-01	2.56E-02		MYC,MKNK1,MAPT
Myc Mediated Apoptosis Signaling	9.56E-01	3.45E-02		MYC,CASP9
Gαi Signaling	9.44E-01	2.5E-02		P2RY14,RAP1GAP,PTGER3
Breast Cancer Regulation by Stathmin1	9.33E-01	2.11E-02		PPP1R14B,PLCB4,TUBA4A,CAMK1D
PI3K Signaling in B Lymphocytes	9.2E-01	2.44E-02		FYN,PLCB4,ATF5
NAD biosynthesis II (from tryptophan)	9.2E-01	7.69E-02		NMNAT2
Eicosanoid Signaling	9.2E-01	3.28E-02		GGT1,PTGER3
Superpathway of Citrulline Metabolism	8.9E-01	7.14E-02		GLS2
Insulin Receptor Signaling	8.83E-01	2.34E-02		FYN,PPP1R14B,EIF4EBP1
Leukotriene Biosynthesis	8.62E-01	6.67E-02		GGT1
γ-glutamyl Cycle	8.62E-01	6.67E-02		GGT1
Chemokine Signaling	8.44E-01	2.94E-02		PLCB4,CAMK1D
Granzyme B Signaling	8.36E-01	6.25E-02		CASP9
Parkinson's Signaling	8.36E-01	6.25E-02		CASP9
eNOS Signaling	8.34E-01	2.22E-02		PGF,CASP9,AQP8
D-myo-inositol-5-phosphate Metabolism	8.27E-01	2.21E-02		PPP1R14B,PLCB4,PTPRJ
Small Cell Lung Cancer Signaling	8.14E-01	2.82E-02		MYC,CASP9
Prolactin Signaling	7.95E-01	2.74E-02		MYC,FYN
Acute Myeloid Leukemia Signaling	7.68E-01	2.63E-02		MYC,EIF4EBP1
Dopamine Receptor Signaling	7.59E-01	2.6E-02		PPP1R14B,PCBD1
Reelin Signaling in Neurons	7.42E-01	2.53E-02		FYN,MAPT
Aldosterone Signaling in Epithelial Cells	7.33E-01	1.99E-02		CRYAB,PLCB4,AHCY
Gap Junction Signaling	7.33E-01	1.99E-02		BGLAP,PLCB4,TUBA4A
Prostate Cancer Signaling	7.33E-01	2.5E-02		CASP9,KLK3
NAD Salvage Pathway II	7.29E-01	4.76E-02		NMNAT2
Endoplasmic Reticulum Stress Pathway	7.29E-01	4.76E-02		CASP9
Colorectal Cancer Metastasis Signaling	7.18E-01	1.73E-02	-1.000	MYC,PGF,CASP9,PTGER3
HIPPO signaling	6.94E-01	2.35E-02		PPP1R14B,TEAD2
FAK Signaling	6.86E-01	2.33E-02		FYN,ARHGAP26
UVA-Induced MAPK Signaling	6.78E-01	2.3E-02		PLCB4,CASP9
IL-22 Signaling	6.77E-01	4.17E-02		IL22RA1
Tumoricidal Function of Hepatic Natural Killer Cells	6.77E-01	4.17E-02		CASP9
Estrogen-mediated S-phase Entry	6.77E-01	4.17E-02		MYC
Virus Entry via Endocytic Pathways	6.64E-01	2.25E-02		FYN,TFRC
Pyrimidine Ribonucleotides Interconversion	6.61E-01	4E-02		ENTPD1
Endothelin-1 Signaling	6.48E-01	1.8E-02		MYC,PLCB4,CASP9
Antiproliferative Role of TOB in T Cell Signaling	6.46E-01	3.85E-02		PABPC4
D-myo-inositol (1,4,5)-Trisphosphate Biosynthesis	6.46E-01	3.85E-02		PLCB4
Calcium Signaling	6.33E-01	1.76E-02		TRPV6,CAMK1D,CAMKK1
IL-15 Production	6.32E-01	3.7E-02		PTK7
Pyrimidine Ribonucleotides De Novo Biosynthesis	6.32E-01	3.7E-02		ENTPD1
Sertoli Cell-Sertoli Cell Junction Signaling	6.19E-01	1.73E-02		CLDN10,CLDN9,TUBA4A
Intrinsic Prothrombin Activation Pathway	6.18E-01	3.57E-02		KLK3
Neuropathic Pain Signaling In Dorsal Horn Neurons	5.97E-01	2.02E-02		PLCB4,CAMK1D
Retinoate Biosynthesis I	5.92E-01	3.33E-02		SDR9C7
ILK Signaling	5.82E-01	1.66E-02		MYC,PPP1R14B,PGF
Cytotoxic T Lymphocyte-mediated Apoptosis of Target Cells	5.8E-01	3.23E-02		CASP9
G Protein Signaling Mediated by Tubby	5.8E-01	3.23E-02		PLCB4
Clathrin-mediated Endocytosis Signaling	5.7E-01	1.63E-02		FGF21,PGF,TFRC
Superpathway of Inositol Phosphate Compounds	5.7E-01	1.63E-02		PPP1R14B,PLCB4,PTPRJ
Inhibition of Angiogenesis by TSP1	5.68E-01	3.12E-02		FYN
Molecular Mechanisms of Cancer	5.59E-01	1.39E-02		MYC,FYN,PLCB4,CASP9,BMP3
TWEAK Signaling	5.57E-01	3.03E-02		CASP9
Pancreatic Adenocarcinoma Signaling	5.55E-01	1.89E-02		PGF,CASP9
Sphingosine-1-phosphate Signaling	5.44E-01	1.85E-02		PLCB4,CASP9
Leukocyte Extravasation Signaling	5.33E-01	1.55E-02		CLDN10,CLDN9,RAP1GAP
Notch Signaling	5.15E-01	2.7E-02		DTX1
tRNA Charging	5.05E-01	2.63E-02		LARS2
Synaptic Long Term Potentiation	5.02E-01	1.72E-02		PPP1R14B,PLCB4
Docosahexaenoic Acid (DHA) Signaling	4.96E-01	2.56E-02		CASP9
Netrin Signaling	4.96E-01	2.56E-02		NTN1
p70S6K Signaling	4.92E-01	1.69E-02		PLCB4,MAPT
P2Y Purigenic Receptor Signaling Pathway	4.92E-01	1.69E-02		MYC,PLCB4
Role of PKR in Interferon Induction and Antiviral Response	4.87E-01	2.5E-02		CASP9
Neuroprotective Role of THOP1 in Alzheimer's Disease	4.87E-01	2.5E-02		MAPT
D-myo-inositol (1,4,5,6)-Tetrakisphosphate Biosynthesis	4.83E-01	1.67E-02		PPP1R14B,PTPRJ
D-myo-inositol (3,4,5,6)-tetrakisphosphate Biosynthesis	4.83E-01	1.67E-02		PPP1R14B,PTPRJ
Dermatan Sulfate Biosynthesis (Late Stages)	4.7E-01	2.38E-02		CHST2
Serotonin Receptor Signaling	4.62E-01	2.33E-02		PCBD1
Role of Osteoblasts, Osteoclasts and Chondrocytes in Rheumatoid Arthritis	4.56E-01	1.4E-02		BGLAP,CASP9,BMP3
Chondroitin Sulfate Biosynthesis (Late Stages)	4.54E-01	2.27E-02		CHST2
MSP-RON Signaling Pathway	4.38E-01	2.17E-02		KLK3
Human Embryonic Stem Cell Pluripotency	4.34E-01	1.53E-02		KLK3,BMP3
TNFR1 Signaling	4.31E-01	2.13E-02		CASP9
Relaxin Signaling	4.3E-01	1.52E-02		PDE8B,PDE2A
Ephrin A Signaling	4.24E-01	2.08E-02		FYN
Aryl Hydrocarbon Receptor Signaling	4.18E-01	1.48E-02		MYC,ALDH1L2
3-phosphoinositide Degradation	4.1E-01	1.46E-02		PPP1R14B,PTPRJ
Amyloid Processing	4.1E-01	2E-02		MAPT
CD27 Signaling in Lymphocytes	4.03E-01	1.96E-02		CASP9
Nur77 Signaling in T Lymphocytes	4.03E-01	1.96E-02		CASP9
Semaphorin Signaling in Neurons	3.97E-01	1.92E-02		FYN
Chondroitin Sulfate Biosynthesis	3.97E-01	1.92E-02		CHST2
Regulation of eIF4 and p70S6K Signaling	3.91E-01	1.41E-02		MKNK1,EIF4EBP1
UVB-Induced MAPK Signaling	3.9E-01	1.89E-02		EIF4EBP1
Unfolded protein response	3.9E-01	1.89E-02		SEL1L
Lymphotoxin β Receptor Signaling	3.84E-01	1.85E-02		CASP9
Phospholipases	3.84E-01	1.85E-02		PLCB4
Glioblastoma Multiforme Signaling	3.8E-01	1.38E-02		MYC,PLCB4
Thrombopoietin Signaling	3.78E-01	1.82E-02		MYC
Dermatan Sulfate Biosynthesis	3.78E-01	1.82E-02		CHST2
Wnt/Ca+ pathway	3.78E-01	1.82E-02		PLCB4
3-phosphoinositide Biosynthesis	3.73E-01	1.36E-02		PPP1R14B,PTPRJ
ErbB2-ErbB3 Signaling	3.72E-01	1.79E-02		MYC
Glutamate Receptor Signaling	3.72E-01	1.79E-02		SLC1A4
Glioma Invasiveness Signaling	3.67E-01	1.75E-02		VTN
Induction of Apoptosis by HIV1	3.56E-01	1.69E-02		CASP9
Retinoic acid Mediated Apoptosis Signaling	3.56E-01	1.69E-02		CASP9
Antiproliferative Role of Somatostatin Receptor 2	3.5E-01	1.67E-02		SSTR2
Role of PI3K/AKT Signaling in the Pathogenesis of Influenza	3.45E-01	1.64E-02		CASP9
Protein Ubiquitination Pathway	3.42E-01	1.18E-02		UBE2F,CRYAB,PSMB10
Xenobiotic Metabolism Signaling	3.38E-01	1.17E-02		CHST2,ALDH1L2,CAMK1D
Mitotic Roles of Polo-Like Kinase	3.35E-01	1.59E-02		PLK2
ERK5 Signaling	3.35E-01	1.59E-02		MYC
Cell Cycle: G1/S Checkpoint Regulation	3.35E-01	1.59E-02		MYC
Hypoxia Signaling in the Cardiovascular System	3.35E-01	1.59E-02		UBE2F
Angiopoietin Signaling	3.25E-01	1.54E-02		CASP9
Non-Small Cell Lung Cancer Signaling	3.25E-01	1.54E-02		CASP9
Remodeling of Epithelial Adherens Junctions	3.2E-01	1.52E-02		TUBA4A
GABA Receptor Signaling	3.2E-01	1.52E-02		GABRA4
Granulocyte Adhesion and Diapedesis	3.17E-01	1.21E-02		CLDN10,CLDN9
Neurotrophin/TRK Signaling	3.16E-01	1.49E-02		KLK3
Tight Junction Signaling	3.14E-01	1.2E-02		CLDN10,CLDN9
Role of NFAT in Regulation of the Immune Response	3.14E-01	1.2E-02		FYN,PLCB4
Wnt/β-catenin Signaling	3.14E-01	1.2E-02		MYC,SOX7
Melatonin Signaling	3.11E-01	1.47E-02		PLCB4
Basal Cell Carcinoma Signaling	3.07E-01	1.45E-02		BMP3
FLT3 Signaling in Hematopoietic Progenitor Cells	2.98E-01	1.41E-02		EIF4EBP1
Ephrin Receptor Signaling	2.98E-01	1.16E-02		FYN,PGF
Caveolar-mediated Endocytosis Signaling	2.94E-01	1.39E-02		FYN
Leptin Signaling in Obesity	2.9E-01	1.37E-02		PLCB4
STAT3 Pathway	2.9E-01	1.37E-02		MYC
Agranulocyte Adhesion and Diapedesis	2.9E-01	1.14E-02		CLDN10,CLDN9
Role of NFAT in Cardiac Hypertrophy	2.87E-01	1.14E-02		PLCB4,CAMK1D
BMP signaling pathway	2.86E-01	1.35E-02		BMP3
HER-2 Signaling in Breast Cancer	2.78E-01	1.32E-02		CASP9
VEGF Family Ligand-Receptor Interactions	2.78E-01	1.32E-02		PGF
PDGF Signaling	2.74E-01	1.3E-02		MYC
mTOR Signaling	2.72E-01	1.1E-02		PGF,EIF4EBP1
Regulation of IL-2 Expression in Activated and Anergic T Lymphocytes	2.7E-01	1.28E-02		FYN
IL-8 Signaling	2.7E-01	1.09E-02		PGF,EIF4EBP1
Thrombin Signaling	2.6E-01	1.07E-02		PLCB4,CAMK1D
GPCR-Mediated Nutrient Sensing in Enteroendocrine Cells	2.53E-01	1.2E-02		PLCB4
FGF Signaling	2.46E-01	1.18E-02		FGF21
Integrin Signaling	2.43E-01	1.03E-02		FYN,ARHGAP26
Neuregulin Signaling	2.43E-01	1.16E-02		MYC
CTLA4 Signaling in Cytotoxic T Lymphocytes	2.39E-01	1.15E-02		FYN
Apoptosis Signaling	2.36E-01	1.14E-02		CASP9
Factors Promoting Cardiogenesis in Vertebrates	2.33E-01	1.12E-02		BMP3
VEGF Signaling	2.33E-01	1.12E-02		PGF
Death Receptor Signaling	2.27E-01	1.1E-02		CASP9
Chronic Myeloid Leukemia Signaling	2.24E-01	1.09E-02		MYC
Fcγ Receptor-mediated Phagocytosis in Macrophages and Monocytes	2.21E-01	1.08E-02		FYN
Salvage Pathways of Pyrimidine Ribonucleotides	2.21E-01	1.08E-02		UPP2
Glioma Signaling	2.19E-01	1.06E-02		CAMK1D
Mouse Embryonic Stem Cell Pluripotency	2.19E-01	1.06E-02		MYC
Antioxidant Action of Vitamin C	2.19E-01	1.06E-02		PLCB4
Telomerase Signaling	2.13E-01	1.04E-02		MYC
T Cell Receptor Signaling	2.13E-01	1.04E-02		FYN
IGF-1 Signaling	2.1E-01	1.03E-02		CASP9
HIF1α Signaling	2.03E-01	1E-02		PGF
Cholecystokinin/Gastrin-mediated Signaling	2E-01	9.9E-03		PLCB4

## Sheet: Upstream Regulators UP 3-fold
© 2000-2015 QIAGEN. All rights reserved.
Upstream Regulator	Fold Change	Molecule Type	Predicted Activation State	Activation z-score	Notes	p-value of overlap	Target molecules in dataset	Mechanistic Network
TNF		cytokine		1.939	bias	7.70E-09	AGT,CAT,CCL5,CFB,CFD,COL1A2,CXCR4,CYBA,EDN1,EGR1,EHF,HPGD,ICOSLG/LOC102723996,ITGA4,ITGB6,JUN,MUC5AC,NR4A2,OAS2,PIGR,RGS2,SEPP1,SLC1A2,SOAT1,SOX9	41 (7)
TGFB1		growth factor	Activated	2.431	bias	4.74E-07	ALB,ANGPTL4,CCL5,CLDN4,COL1A1,COL1A2,CXCR4,EDN1,FURIN,ITGA4,JUN,MKI67,PIK3CD,SERPINA3,SFRP1,SMC2,THBS1,TOP2A
IFNG		cytokine	Activated	3.127	bias	5.49E-07	AGT,CAT,CCL5,CIITA,CXCR4,DDX58,DUOX2,HLA-DQB1,HLA-DRA,ICOSLG/LOC102723996,IRF8,NLRC5,OAS2,PIGR,PTN,SERPINA5,SOAT1,USP18	40 (4)
SMARCA4	1.489	transcription regulator				8.04E-07	AGR2,AGT,ARHGDIB,CD74,CIITA,CTSH,FBLIM1,HLA-DRA,HPGD,JUN,SEPP1,SPP1,THY1
USF1		transcription regulator				8.10E-07	AGT,B2M,CCNG2,CIITA,FBXO32,PIGR,SPP1
CEBPA		transcription regulator		0.707	bias	1.17E-06	ANPEP,C3AR1,CA2,CXCR4,EPHX1,OAS2,PFN2,PTPRC,RGS2,SPP1,TBXAS1
ERK1/2		group		1.584	bias	4.48E-06	B2M,CAT,CCL5,CXCR4,EGR1,HPGD,IGF1R,JUN,MUC5AC,PTN	41 (7)
RELA		transcription regulator				6.91E-06	ARHGDIB,B2M,CCL5,CIITA,COL1A1,CXCR4,EDN1,EHF,SLC1A2,SLC2A5,SOX9	15 (2)
MAP3K7		kinase	Inhibited	-2.236	bias	7.69E-06	CCL5,CFB,JUN,MUC5AC,RGS2,XAF1	12 (3)
TGM2		enzyme		1.976	bias	9.43E-06	AMICA1,CA2,CD74,FERMT1,GM2A,LSP1,LY6E,OAS2,SLC25A20,SLC9B2,SPP1,THBS1,XAF1
SMC3		other				1.25E-05	HLA-DQA1,HLA-DQB1,HLA-DRA
IL27		cytokine		1.937	bias	1.37E-05	B2M,CCL5,CD14,CIITA,HLA-DQA1,HLA-DRA,HPGD
TAB1		enzyme	Inhibited	-2.236	bias	1.44E-05	CCL5,CFB,JUN,RGS2,XAF1
IL1B		cytokine		1.430	bias	1.81E-05	CAT,CCL5,CIITA,COL1A1,CXCR4,EDN1,EGR1,EHF,HLA-DRA,MUC5AC,NR4A2,SERPINA3	29 (6)
RFX5		transcription regulator				2.08E-05	B2M,CD74,COL1A2,HLA-DRA
ALB	6.493	transporter				3.09E-05	AGT,ALB,CYBA
FOXO1		transcription regulator	Activated	2.236	bias	5.72E-05	CCNG2,EDN1,EGR1,FBXO32,IGF1R,ITGB6,MCM5
STAT1	2.633	transcription regulator				7.96E-05	AGT,CD14,CIITA,DUOX2,OAS2,PTN
RFXAP		transcription regulator				1.06E-04	COL1A2,HLA-DQA1,HLA-DRA
SP1		transcription regulator				1.29E-04	CAT,CIITA,COL1A1,EGR1,FES,IL2RB,JUN,MUC5AC,PROM1,PTN,SOX9,SPP1
EPAS1		transcription regulator				1.77E-04	ANGPTL4,CKB,CORO1A,EDN1,L1CAM,SOX9,TMEM45A
TREM1		transmembrane receptor		1.706	bias	2.10E-04	ATP1B1,CCL5,CFB,CXCR4,EDN1,EGR1,NR4A2,NT5E,SPP1,THBS1	43 (7)
DAB2IP		other				2.16E-04	CLU,EGR1
RFXANK		transcription regulator				2.16E-04	COL1A2,HLA-DRA
ERBB2	2.281	kinase	Activated	2.449	bias	2.21E-04	ANGPTL4,CLDN4,COL1A1,EDN1,JUN,MKI67,PIK3CD,SMC2,THBS1,TOP2A
ERN1		kinase				2.26E-04	CYP1B1,ITGB6,OAS2,SYT11,TMPRSS2
EBI3		cytokine		1.980	bias	2.26E-04	B2M,CIITA,HLA-DQA1,HLA-DRA
SIN3A		transcription regulator				3.27E-04	CCNG2,COL1A2,FBXO32,HLA-DRA
IL13		cytokine		-0.718	bias	3.49E-04	C3AR1,CCL5,CD14,CD37,COL1A2,CXCR4,KCNJ15,MUC5AC,SLA,THBS1
TCR		complex		1.000	bias	3.55E-04	APOD,CXCL13,CXCR4,DDX58,ITGB7,JUN,PIK3CD,PIK3R1,PTPRC
ESR1		ligand-dependent nuclear receptor		1.387	bias	3.77E-04	AGT,C1QTNF6,CCNG2,CYP1B1,EDN1,ICOSLG/LOC102723996,IGF1R,JUN,MKI67,MUC5AC,SEMA3B
TCF4		transcription regulator				3.88E-04	EDN1,JUN,MIA,SOX9
EHF	4.642	transcription regulator		0.000	bias	4.93E-04	ANGPTL4,ANPEP,BLNK,EHF,SERPINA3,THY1
SOX11		transcription regulator		0.816	bias	5.77E-04	AS3MT,CCL5,CXCR4,EGR1,ITGA4,TIAM1
Hdac		group	Inhibited	-2.167	bias	6.19E-04	CCNG2,EGR1,FBXO32,JUN,SPP1
FGF21		growth factor				6.42E-04	EGR1,HMGCS2
ENTPD5		enzyme				6.42E-04	COL1A1,COL1A2
MAPK1		kinase	Inhibited	-2.333		6.84E-04	CCL5,CFB,DDX58,ITPR2,LGALS3BP,NT5E,OAS2,TRIM5,USP18
MITF		transcription regulator		1.980	bias	8.19E-04	CCNG2,COL1A1,FBXO32,SOX9
TCF		group				8.33E-04	APOD,CNN2,GPX2,SERPINA3,SERPINA5,TSPAN8
PDGF BB		complex	Activated	2.449	bias	8.94E-04	EDN1,EGR1,JUN,NR4A2,RGS2,THBS1
MYC		transcription regulator				1.05E-03	CCNG2,CLU,COL1A1,FBXO32,JUN,PROM1,SCPEP1,SOX9,SPP1
NFkB (complex)		complex	Activated	2.183	bias	1.11E-03	CCL5,CIITA,CLU,CXCR4,DTX3,EDN1,EHF,LSP1,SLC2A5,SOAT1	27 (5)
CTNNB1		transcription regulator				1.12E-03	APOD,CNN2,EDN1,GPX2,SERPINA3,SERPINA5,SOX9,TSPAN8	8 (2)
CYP2E1		enzyme				1.27E-03	CAT,MGST1
APLN		other				1.27E-03	CAT,NCF1
ERK		group	Activated	2.425	bias	1.33E-03	COL1A1,EGR1,JUN,MUC5AC,PDK4,THBS1	19 (3)
Ap1		complex				1.35E-03	C3AR1,EDN1,HPGD,JUN
PRKCD	1.365	kinase		1.980	bias	1.68E-03	CIITA,COL1A1,COL1A2,MUC5AC
CDX2		transcription regulator				1.87E-03	FUT2,JUN,S100G,SOX9
Pkc(s)		group		1.154	bias	2.08E-03	HPGD,JUN,MUC5AC,RGS2	18 (3)
CREBBP		transcription regulator				2.08E-03	FGL1,NR4A2,RGS2,SLC1A2
HISTONE		group				2.10E-03	CIITA,HPGD
ZBTB7B		transcription regulator				2.10E-03	COL1A1,COL1A2
PSMD4		other				2.10E-03	CD14,MARCO
SATB1	4.447	transcription regulator		-0.633		2.14E-03	EPSTI1,FAM65B,IKZF1,IRF8,NR4A2,XAF1
P38 MAPK		group				2.22E-03	CCL5,CCNG2,DUOX2,EGR1,JUN,MUC5AC,TOP2A	21 (4)
HNF1A		transcription regulator				2.22E-03	ABCC2,ALB,ANPEP,CPQ,FGL1,GCNT3,GMDS
NFKB1	1.519	transcription regulator				2.51E-03	B2M,CCL5,CIITA,COL1A1,EHF	15 (3)
CREB1		transcription regulator				2.53E-03	CIITA,HLA-DRA,NR4A2,RGS2
CDK9		kinase				2.57E-03	CCL5,CXCR4,PDK4
SIN3B		transcription regulator				2.57E-03	CCNG2,COL1A2,FBXO32
RAD21		other				2.99E-03	HLA-DQA1,HLA-DQB1,HLA-DRA
AGT	3.808	growth factor				3.12E-03	COL1A1,EGR1
PML		transcription regulator				3.12E-03	CIITA,HLA-DRA
FGFR2		kinase				3.12E-03	COL1A1,SPP1
DNAJB6		transcription regulator				3.12E-03	AZGP1,SPP1
IL1RN		cytokine	Inhibited	-2.219	bias	3.27E-03	CIITA,DDX58,HLA-DQB1,OAS2,USP18	19 (3)
POU2F1		transcription regulator				3.45E-03	HLA-DRA,SPP1,TMPRSS2
HIF1A		transcription regulator	Activated	2.213	bias	3.92E-03	AGT,ANGPTL4,CORO1A,CXCR4,L1CAM,PROM1,SOX9,TMEM45A
BRCA1		transcription regulator		-1.192		3.94E-03	CCL5,CYP1B1,DDX58,EGR1
USF2		transcription regulator				3.96E-03	AGT,B2M,PIGR
ETS		group				4.32E-03	C3AR1,HPGD
SMAD1		transcription regulator				4.32E-03	COL1A1,COL1A2
ADRB2		g-protein coupled receptor				4.32E-03	ATP1B1,CYP1B1
HLX		transcription regulator				4.50E-03	CYP1B1,EGR1,JUN
HDAC6		transcription regulator				4.50E-03	COL1A1,CYP1B1,JUN
AR		ligand-dependent nuclear receptor		1.451	bias	5.30E-03	AZGP1,EGR1,IGF1R,PIGR,THBS1,TMPRSS2
PRKCA		kinase				5.39E-03	ARHGDIB,EGR1,JUN,MUC5AC	22 (5)
MEMO1		other				5.71E-03	CA2,JUN
IRF8	3.207	transcription regulator				5.71E-03	B2M,CIITA
NLRP12		other				5.71E-03	CXCL13,CXCR4
FANCC		other				6.24E-03	ATP1B1,PTPRC,SNX7,UGT2B7
IGF1R	3.054	transmembrane receptor				6.40E-03	CCL5,IGF1R,PROM1
BCL6		transcription regulator		1.980	bias	7.16E-03	BLNK,CIITA,COL1A1,SOX9
Tgf beta		group				7.27E-03	COL1A1,COL1A2
ITGB2		transmembrane receptor				7.27E-03	ITGA4,RAC2
MNT		transcription regulator				7.27E-03	CCNG2,FBXO32
RNA polymerase II		complex				7.45E-03	B2M,BLNK,CIITA,CXCR4,CYP1B1,L1CAM
IFNA2		cytokine	Activated	2.183	bias	7.64E-03	DDX58,LGALS3BP,LY6E,OAS2,USP18
TLR3	2.865	transmembrane receptor				7.64E-03	CCL5,CFB,DDX58,PIK3CD,PIK3R1
RUNX1		transcription regulator				7.89E-03	ALB,MECOM,SPP1
AHR		ligand-dependent nuclear receptor				7.89E-03	CCL5,CYP1B1,EDN1
SP3		transcription regulator				8.02E-03	COL1A1,COL1A2,EGR1,JUN,MUC5AC
SMAD4		transcription regulator				8.42E-03	AGR2,CCNG2,ITGB7,PTPRC,THBS1
Rxr		group				9.00E-03	ANGPTL4,FURIN
MTA3		other				9.00E-03	BLNK,CIITA
KDM1A		enzyme				9.00E-03	SFRP1,SFRP5
EIF2AK2		kinase	Activated	2.000	bias	9.29E-03	DDX58,GABBR1,LGALS3BP,USP18
IL21		cytokine		1.000	bias	9.29E-03	CCL5,CXCL13,MKI67,PTPRC
EGR1	6.235	transcription regulator				9.57E-03	COL1A2,HPGD,THBS1
CNOT7		transcription regulator				1.05E-02	B2M,LGALS3BP,OAS2
NFIX		transcription regulator				1.09E-02	POSTN,SERPINA3
PIK3R1	3.119	kinase				1.09E-02	PIK3CD,PIK3R1
LY6E	6.521	other				1.09E-02	CD14,HLA-DRA
FGF2		growth factor				1.14E-02	CXCR4,EGR1,FUT2
IFNL1		cytokine	Activated	2.000	bias	1.18E-02	DDX58,LGALS3BP,OAS2,USP18
HIC1		transcription regulator		1.000		1.18E-02	CA2,CDO1,SOX9,SPP1
DICER1		enzyme				1.18E-02	ANGPTL4,ANPEP,CXCR4,THBS1
TGFBR2	1.935	kinase				1.18E-02	ALOX12,ANGPTL4,HPGD,JUN
TP63		transcription regulator		-0.980	bias	1.18E-02	GPX2,ITGA4,L1CAM,POSTN,RAC2,THBS1
FOSL2	2.355	transcription regulator				1.29E-02	COL1A2,HPGD
SYVN1		transporter	Activated	2.449	bias	1.36E-02	CYP1B1,IGF1R,L1CAM,LGALS3BP,SCARA3,SLC39A10
ALG10		enzyme				1.47E-02	PROM1
SHP		group				1.47E-02	EGR1
p70 S6k		group				1.47E-02	ICOSLG/LOC102723996
ITPR		group				1.47E-02	CYP1B1
cAMP-Gef		group				1.47E-02	CYP1B1
Adaptor protein 2		complex				1.47E-02	PIGR
ASB9		transcription regulator				1.47E-02	CKB
MOGS		enzyme				1.47E-02	PROM1
ALG8		enzyme				1.47E-02	PROM1
PRMT6		enzyme				1.47E-02	THBS1
ALG6		enzyme				1.47E-02	PROM1
ALG5		enzyme				1.47E-02	PROM1
G protein		complex				1.47E-02	CYP1B1
MGAT4C		enzyme				1.47E-02	PROM1
Mannosidase2		group				1.47E-02	PROM1
TNFRSF10A		transmembrane receptor				1.47E-02	CD14
PRPF4		other				1.47E-02	CCL5
miR-18a-5p (and other miRNAs w/seed AAGGUGC)		mature microrna				1.47E-02	THBS1
miR-196a-5p (and other miRNAs w/seed AGGUAGU)		mature microrna				1.47E-02	COL1A1
mir-196		microrna				1.47E-02	COL1A1
mir-493		microrna				1.47E-02	IGF1R
ABHD5		enzyme				1.47E-02	PDK4
ACOT8		enzyme				1.47E-02	CAT
AGTR1		g-protein coupled receptor				1.47E-02	CYBA
DDOST		enzyme				1.47E-02	PROM1
SNCG		other				1.47E-02	IGF1R
ZBTB32		transcription regulator				1.47E-02	CIITA
DMTF1		transcription regulator				1.47E-02	ANPEP
GPBP1		transcription regulator				1.47E-02	TOP2A
RACGAP1		transporter				1.47E-02	CD14
PA2G4		transcription regulator				1.47E-02	AGR2
BRMS1	2.277	other				1.47E-02	CXCR4
PRR13		other				1.47E-02	THBS1
GH1		growth factor				1.51E-02	CAT,EGR1
MGEA5	1.535	enzyme	Inhibited	-2.121	bias	1.74E-02	AZGP1,CCNG2,GLUL,ITGB7,JUN,PROM1,SFRP5,THBS1
AMPK		complex				1.75E-02	CAT,NCF1
VDR		transcription regulator				1.75E-02	CD14,UCP2
ATF1		transcription regulator				1.75E-02	CIITA,THBS1
PI3K (complex)		complex				1.80E-02	COL1A1,IGF1R,NR4A2,RGS2
ESRRG		ligand-dependent nuclear receptor				2.00E-02	KCNQ1,PDK4
Ifn gamma		complex				2.00E-02	IRF8,XAF1
SMARCD3		transcription regulator				2.00E-02	COL1A1,SOX9
T		transcription regulator				2.00E-02	COL1A1,SOX9
IL6		cytokine		1.270	bias	2.03E-02	AGT,ALB,CLU,SERPINA3,THBS1
LGALS3	2.460	other				2.09E-02	CTSH,MGST1,MUC5AC
ITGAV		ion channel				2.26E-02	COL1A1,COL1A2
ELF4	2.331	transcription regulator				2.26E-02	CA2,PIK3C3
ELK1		transcription regulator				2.26E-02	MECOM,THBS1
NR3C1		ligand-dependent nuclear receptor		1.000	bias	2.38E-02	ANGPTL4,ATP1B1,CCL5,GLUL,IFT122,IGF1R,PIK3CD,PIK3R1,RGS2,SLC19A2,SPP1
estrogen receptor		group		0.378		2.39E-02	CAPG,CLDN4,CXCR4,EDN1,LY6E,NT5E,RGS2
IgG		complex		-0.896	bias	2.51E-02	ATP1B1,B2M,CCL5,CLDN4,EDN1
GATA4		transcription regulator				2.53E-02	COL1A1,COL1A2,EPHX1
IRF2		transcription regulator				2.54E-02	B2M,CIITA
NCR2		transmembrane receptor				2.54E-02	NR4A2,THBS1
Histone h3		group				2.75E-02	B2M,CIITA,IGF1R,NCF1,SFRP1,TPM3
JUND		transcription regulator				2.83E-02	AGT,HPGD
SPI1		transcription regulator				2.85E-02	CIITA,FES,VAV1
CACTIN		other				2.92E-02	CCL5
RNF187		enzyme				2.92E-02	JUN
ABCB6		transporter				2.92E-02	CAT
SARM1		transmembrane receptor				2.92E-02	CCL5
RRM2		enzyme				2.92E-02	THBS1
NODAL		growth factor				2.92E-02	CCNG2
CUL4A		other				2.92E-02	CAT
mir-192		microrna				2.92E-02	IGF1R
mir-183		microrna				2.92E-02	EGR1
miR-24-3p (and other miRNAs w/seed GGCUCAG)		mature microrna				2.92E-02	FURIN
GJA1		transporter				2.92E-02	THBS1
DDR1	1.507	kinase				2.92E-02	COL1A1
CALR	1.470	transcription regulator				2.92E-02	COL1A2
GABBR2		g-protein coupled receptor				2.92E-02	GABBR1
NELFA		other				2.92E-02	CYP1B1
MGAT5		enzyme				2.92E-02	PROM1
TRAF7		enzyme				2.92E-02	JUN
MEF2A		transcription regulator				2.92E-02	JUN
ARRB1		other				2.92E-02	SPP1
KLB		enzyme				2.92E-02	EGR1
SRY		transcription regulator				2.92E-02	SOX9
SMPD1		enzyme				2.92E-02	CCL5
CLCA1		ion channel				2.92E-02	MUC5AC
HLA-B		transmembrane receptor				2.92E-02	OAS2
RAPGEF3		other				2.92E-02	CYP1B1
PAF1		other				3.01E-02	CCL5,DDX58,OAS2
STAT3		transcription regulator		1.987	bias	3.05E-02	AGT,DTX3,NR4A2,PTN,XAF1
GATA2		transcription regulator				3.13E-02	CCL5,TMPRSS2
NFKB2	1.625	transcription regulator				3.13E-02	CXCL13,CXCR4
TNFSF10		cytokine				3.13E-02	CD14,JUN
RELB		transcription regulator				3.13E-02	B2M,CIITA
Creb		group				3.36E-02	EGR1,HPGD,RGS2
PPARD		ligand-dependent nuclear receptor				3.45E-02	ANGPTL4,PDK4
MYD88		other				3.45E-02	CCL5,MUC5AC
PPARG		ligand-dependent nuclear receptor				3.54E-02	ANGPTL4,COL1A1,COL1A2
IRF4		transcription regulator				3.54E-02	B2M,CIITA,SPP1
EGF		growth factor				3.54E-02	EGR1,FUT2,MUC5AC
SRF		transcription regulator				3.55E-02	EGR1,FILIP1L,MGST1,NR4A2
SBDS		other				3.69E-02	COL27A1,EGR1,FBXO32,SPP1
FOXO3		transcription regulator				3.73E-02	CCNG2,EGR1,FBXO32
FOXA2		transcription regulator				3.78E-02	AGR2,EPHX1
YY1		transcription regulator				4.11E-02	HLA-DRA,SLC1A2
CDKN1A		kinase				4.12E-02	LGALS3BP,SOX9,TOP2A
PDLIM2	2.458	other		0.000		4.25E-02	LGALS3BP,MECOM,PHLDA3,SCARA3
Integrin		complex				4.35E-02	JUN
HTR7		g-protein coupled receptor				4.35E-02	THBS1
MTDH		transcription regulator				4.35E-02	SLC1A2
PRR7		other				4.35E-02	JUN
COL1A1	4.182	other				4.35E-02	CXCR4
KLHL2		other				4.35E-02	JUN
WHSC1		enzyme				4.35E-02	CA2
Ifn		group				4.35E-02	OAS2
Collagen type I		complex				4.35E-02	CCL5
AP2M1		transporter				4.35E-02	CD74
COL2A1		other				4.35E-02	CXCR4
ADAM17		peptidase				4.35E-02	MUC5AC
MAP3K3		kinase				4.35E-02	JUN
mir-31		microrna				4.35E-02	TIAM1
MAPK12		kinase				4.35E-02	JUN
SPHK2		kinase				4.35E-02	CCL5
CYBB	2.488	enzyme				4.35E-02	CYBA
N4BP1		other				4.35E-02	JUN
INSR		kinase				4.35E-02	IGF1R
FGF19		growth factor				4.35E-02	EGR1
EIF2AK4		kinase				4.35E-02	EGR1
MAPK7		kinase				4.35E-02	JUN
IL17RA		transmembrane receptor				4.35E-02	REG3A
FOSB		transcription regulator				4.35E-02	HPGD
SP7		transcription regulator				4.35E-02	COL1A1
POU2F2		transcription regulator				4.35E-02	SPP1
HERC5		enzyme				4.35E-02	CCL5
DRAP1		transcription regulator				4.46E-02	BLNK,HLA-DRA
MYB		transcription regulator				4.46E-02	CXCR4,JUN
PRKCE		kinase				4.82E-02	EGR1,IL2RB
BCR (complex)		complex				4.95E-02	CXCR4,IL2RB,ITGA4

## Sheet: Upstream Regulators DOWN 3-fold
© 2000-2015 QIAGEN. All rights reserved.
Upstream Regulator	Fold Change	Molecule Type	Predicted Activation State	Activation z-score	p-value of overlap	Target molecules in dataset	Mechanistic Network
KIAA1524		other		1.342	1.87E-04	CRLF1,CRYAB,LRP4,PDE2A,TUBA4A
HNRNPA1		other			4.76E-04	KLK3,MYC
Hedgehog		group			1.18E-03	KLK3,MYC
SMO		g-protein coupled receptor			1.18E-03	KLK3,MYC
Alpha catenin		group			1.64E-03	KLK3,MYC
FBXW7	-1.784	transcription regulator			1.64E-03	DTX1,MYC
MEMO1		other			2.17E-03	MYC,STC2
UGT2B17		enzyme			2.17E-03	KLK3,SLC16A6
UGT2B15		enzyme			2.17E-03	KLK3,SLC16A6
GLI2		transcription regulator			3.44E-03	KLK3,MYC
CARM1		transcription regulator			6.80E-03	MYC,SPINK1
TRIB3		kinase			7.80E-03	PSAT1,STC2
HNRNPA2B1		other			7.97E-03	ENTPD1,MYC,PLCB4,PRSS1,PRSS3
Cofilin		group			8.98E-03	MYC
MNK1/2		group			8.98E-03	MYC
RPL21		other			8.98E-03	MYC
ZMIZ1		other			8.98E-03	MYC
SSBP2		transcription regulator			8.98E-03	MYC
FLT4		transmembrane receptor			8.98E-03	BGLAP
GLIPR1		other			8.98E-03	MYC
ITGB5		other			8.98E-03	VTN
PTRF		transcription regulator			8.98E-03	MYC
PRKACB		kinase			8.98E-03	MYC
CTNNBIP1	-2.185	other			8.98E-03	KLK3
CDC45		other			8.98E-03	MYC
miR-185-3p (and other miRNAs w/seed GGGGCUG)		mature microrna			8.98E-03	MYC
RPS14		translation regulator			8.98E-03	MYC
KLF10		transcription regulator			8.98E-03	BGLAP
RNF14		transcription regulator			8.98E-03	KLK3
NCOA5		other			8.98E-03	MYC
MED26		transcription regulator			8.98E-03	MYC
CXCL2		cytokine			8.98E-03	IFRD1
TDG		enzyme			8.98E-03	MYC
GTF2I		transcription regulator			8.98E-03	MYC
CXCR2		g-protein coupled receptor			8.98E-03	IFRD1
ERF	-1.750	transcription regulator			8.98E-03	MYC
RPS20		other			8.98E-03	MYC
EEF1A1		translation regulator			8.98E-03	MYC
CDK11B		kinase			8.98E-03	KLK3
TOP2A		enzyme			8.98E-03	MYC
MYH9		enzyme			8.98E-03	MYC
CDK9		kinase			1.24E-02	BGLAP,MYC
ESR1		ligand-dependent nuclear receptor			1.35E-02	GJB1,GJB2,KLK3,MYC,STC2,TMEM97
YBX1		transcription regulator			1.37E-02	MKNK1,STC2
ERK1/2		group			1.64E-02	CLEC11A,MKNK1,MYC,PSMB10
BMP2		growth factor			1.65E-02	BGLAP,MYC
RPRD1B		other			1.79E-02	MYC
AFF4		transcription regulator			1.79E-02	MYC
KDM4C		other			1.79E-02	KLK3
BCAS3		other			1.79E-02	MYC
EIF4F		complex			1.79E-02	MYC
GLRX3		enzyme			1.79E-02	TFRC
PXN		other			1.79E-02	KLK3
AIRE		transcription regulator			1.79E-02	KLK3
PMEPA1		other			1.79E-02	KLK3
ENO1		enzyme			1.79E-02	MYC
miR-375-3p (and other miRNAs w/seed UUGUUCG)		mature microrna			1.79E-02	MYC
NUBP1		other			1.79E-02	TFRC
MTBP		other			1.79E-02	ODC1
LIMK1		kinase			1.79E-02	MYC
RPL15		other			1.79E-02	MYC
FTL	-1.621	enzyme			1.79E-02	TFRC
P2RY2		g-protein coupled receptor			1.79E-02	VTN
RFX3		transcription regulator			1.79E-02	GCK
DACH1		transcription regulator			1.79E-02	KLK3
FIGF		growth factor			1.79E-02	BGLAP
RPA2		other			1.79E-02	MYC
FTH1		enzyme			1.79E-02	TFRC
PRKACA	-1.416	kinase			1.79E-02	MYC
PCYT1A		enzyme			1.79E-02	MAT1A
FAM103A1		other			1.79E-02	MYC
SIN3A		transcription regulator			1.79E-02	KLK3,MYC
HNF1A		transcription regulator			2.44E-02	GJB1,SEL1L,TFRC,VTN
ZNF217		transcription regulator			2.52E-02	MYC,NMNAT2,PIPOX
Cpla2		group			2.67E-02	MYC
ZMIZ2		transcription regulator			2.67E-02	MYC
ACTL6A		other			2.67E-02	MYC
MRE11A		enzyme			2.67E-02	MYC
JUP		other			2.67E-02	MYC
MAF		transcription regulator			2.67E-02	NUAK1
NKX3-1		transcription regulator			2.67E-02	KLK3
RGS3		other			2.67E-02	MYC
FKBP5		enzyme			2.67E-02	KLK3
CCND3	-1.442	other			2.67E-02	KLK3
URI1		transcription regulator			2.67E-02	KLK3
ABCB7		transporter			2.67E-02	TFRC
HNRNPK		other			2.67E-02	MYC
IREB2		translation regulator			2.67E-02	TFRC
MAP3K11		kinase			2.67E-02	MYC
ATAD2		enzyme			2.67E-02	MYC
KAT5		transcription regulator			2.80E-02	KLK3,MAPT,MYC
CXCL8		cytokine			3.34E-02	IFRD1,KLK3
TERT		enzyme			3.34E-02	KLK3,MYC
Ap1		complex			3.53E-02	BGLAP,MYC
NOTCH1	-1.561	transcription regulator			3.53E-02	BGLAP,MYC
ESR2		ligand-dependent nuclear receptor			3.53E-02	KLK3,MYC
CD28		transmembrane receptor			3.54E-02	FYN,ORAI2,TFRC
OBSCN		kinase			3.55E-02	CASP9
FUT8		enzyme			3.55E-02	TFRC
Nc2		complex			3.55E-02	MYC
HTATIP2		transcription regulator			3.55E-02	MYC
CBX4	-2.168	transcription regulator			3.55E-02	MYC
mir-320		microrna			3.55E-02	TFRC
XAF1		other			3.55E-02	CASP9
SP2		transcription regulator			3.55E-02	BGLAP
CDC37		other			3.55E-02	KLK3
SNRK		kinase			3.55E-02	MYC
RCHY1	-1.710	enzyme			3.55E-02	KLK3
SFPQ		other			3.55E-02	KLK3
PNPT1		enzyme			3.55E-02	MYC
RBCK1		transcription regulator			3.55E-02	MYC
FLT3		kinase			3.55E-02	MYC
ACO1		enzyme			3.55E-02	TFRC
ERK		group			3.77E-02	BGLAP,NDRG1,ODC1
CD40LG		cytokine			4.00E-02	ATF5,PSMB10,TFRC
CTR9		other			4.41E-02	MYC
HISTONE		group			4.41E-02	ATF5
ERVW-1		other			4.41E-02	SLC1A4
MKNK1	-3.702	kinase			4.41E-02	MYC
HSP90AA1		enzyme			4.41E-02	GJB2
RASSF1		other			4.41E-02	MYC
GNE		kinase			4.41E-02	CHAC1
PLD1		enzyme			4.41E-02	MYC
mir-221		microrna			4.41E-02	KLK3
PKM		kinase			4.41E-02	MYC
PIM2		kinase			4.41E-02	MYC
WWOX		enzyme			4.41E-02	BGLAP
NFATC1	-1.790	transcription regulator			4.41E-02	MYC
PHB		transcription regulator			4.41E-02	KLK3
MS4A1		other			4.41E-02	MYC
DAXX		transcription regulator			4.41E-02	KLK3
PELP1		other			4.41E-02	KLK3

## Sheet: Pathways Comparison 3-fold
© 2000-2015 QIAGEN. All rights reserved.
Canonical Pathway	Downreg genes 012015 - 2015-01-25 08:52 PM	DE_Ptf1a_cKO 2wk-3KO_edgeR 01-08-2015 UP - 2015-01-25 08:45 PM
iCOS-iCOSL Signaling in T Helper Cells		10.1023870376519
CD28 Signaling in T Helper Cells	-0.0	7.55801679659556
PKCθ Signaling in T Lymphocytes	-0.0	6.63356847340233
Leukocyte Extravasation Signaling	0.532550607894713	5.60071464775851
Antigen Presentation Pathway		5.80194414920902
IL-4 Signaling		5.66000874590815
Virus Entry via Endocytic Pathways	0.663834600308173	4.93976085498783
Dendritic Cell Maturation	-0.0	5.52194967795888
Role of JAK1 and JAK3 in γc Cytokine Signaling		5.35115698635382
Production of Nitric Oxide and Reactive Oxygen Species in Macrophages	-0.0	5.24666538178568
Role of NFAT in Regulation of the Immune Response	0.313967384132335	4.86595110168038
Amyotrophic Lateral Sclerosis Signaling	1.15509710437762	3.8183000531978
IL-2 Signaling		4.72052847117483
IL-12 Signaling and Production in Macrophages		4.34805334662485
Reelin Signaling in Neurons	0.741727405302964	3.59812499289535
Renin-Angiotensin Signaling		4.26416918554297
Fcγ Receptor-mediated Phagocytosis in Macrophages and Monocytes	0.22141779368692	3.9466844575764
B Cell Development		4.15684349778246
Endothelin-1 Signaling	0.647787051556667	3.47596617624188
Acute Phase Response Signaling		4.11423258905904
Triacylglycerol Degradation	4.09069964566976
T Cell Receptor Signaling	0.21305170558644201	3.84977836221564
PI3K Signaling in B Lymphocytes	0.920411289252546	3.11857333165041
Glycine Degradation (Creatine Biosynthesis)	4.02037044152082
Macropinocytosis Signaling		4.00965536552653
Atherosclerosis Signaling		3.90867513797891
Nicotine Degradation II		3.88089197612029
Actin Cytoskeleton Signaling	-0.0	3.86990195182117
G-Protein Coupled Receptor Signaling	2.44030555633436	1.30559511653688
IL-9 Signaling		3.73854331077191
Retinol Biosynthesis	3.69915608122264
OX40 Signaling Pathway		3.69291373089106
Complement System		3.61786581112577
Myc Mediated Apoptosis Signaling	0.956222433580994	2.65588758043319
EGF Signaling		3.60499735955125
VDR/RXR Activation	1.3990429533577	2.12637411460369
Ephrin A Signaling	0.42373254748616	3.02770280938466
Xenobiotic Metabolism Signaling	0.337544680410269	3.09048452027883
B Cell Receptor Signaling		3.39426835085714
Estrogen-Dependent Breast Cancer Signaling		3.36213000541934
FcγRIIB Signaling in B Lymphocytes		3.3474744999939
Axonal Guidance Signaling	1.60621884964607	1.73240561993845
FAK Signaling	0.685937926023904	2.61545441761214
NRF2-mediated Oxidative Stress Response		3.27636856452626
Leptin Signaling in Obesity	0.289668331472132	2.98264049438035
UVA-Induced MAPK Signaling	0.678457357905167	2.59010177094097
UVB-Induced MAPK Signaling	0.39046965376332193	2.83131159879532
IL-15 Signaling		3.2153368660205
Role of Pattern Recognition Receptors in Recognition of Bacteria and Viruses		3.2133937762412
Nicotine Degradation III		3.20312239944832
Integrin Signaling	0.24279258385609198	2.95271963107629
HIF1α Signaling	0.20250647747066403	2.97806582202359
T Helper Cell Differentiation		3.18030744520727
HER-2 Signaling in Breast Cancer	0.277798842470489	2.89109660685368
CXCR4 Signaling	-0.0	3.16689960680816
LXR/RXR Activation	-0.0	3.16548176144172
GDNF Family Ligand-Receptor Interactions		3.14590412082349
Clathrin-mediated Endocytosis Signaling	0.569510593970249	2.57037190738589
Thrombopoietin Signaling	0.378267916378828	2.75885093206465
ErbB2-ErbB3 Signaling	0.372380065077218	2.72379465463222
Endometrial Cancer Signaling	1.03578180773967	2.03878397634071
FXR/RXR Activation	-0.0	3.0726349630549
Melatonin Degradation I		3.0698967186282
P2Y Purigenic Receptor Signaling Pathway	0.49240088127714404	2.56454216764579
p70S6K Signaling	0.49240088127714404	2.56454216764579
Serine Biosynthesis	3.02880517025324
Allograft Rejection Signaling		3.02770280938466
Prolactin Signaling	0.79492291503213	2.2233631664886
Paxillin Signaling		3.00378394466093
Cdc42 Signaling		2.98354242336555
Docosahexaenoic Acid (DHA) Signaling	0.49610717089395	2.4867708966318
LPS-stimulated MAPK Signaling		2.98264049438035
ERK/MAPK Signaling	1.43888882644042	1.54103101745063
Role of p14/p19ARF in Tumor Suppression		2.97250677150258
14-3-3-mediated Signaling	0.976622074889318	1.98501018897946
Nitric Oxide Signaling in the Cardiovascular System	1.17651320108241	1.75797726708821
Neuropathic Pain Signaling In Dorsal Horn Neurons	0.596860431749065	2.31199460666391
Role of PI3K/AKT Signaling in the Pathogenesis of Influenza	0.3448751907326679	2.55915723715955
Rac Signaling		2.90281841072969
Breast Cancer Regulation by Stathmin1	0.932631933339882	1.96277482789065
Superpathway of Melatonin Degradation		2.86877811984758
CTLA4 Signaling in Cytotoxic T Lymphocytes	0.23944798301167203	2.59010177094097
Role of IL-17A in Arthritis		2.79467985774297
Natural Killer Cell Signaling	-0.0	2.78339054478712
Non-Small Cell Lung Cancer Signaling	0.324940704221176	2.43881760588573
Fc Epsilon RI Signaling	-0.0	2.76035084082449
Altered T Cell and B Cell Signaling in Rheumatoid Arthritis		2.74799297044522
Gap Junction Signaling	0.73346655990401	1.98712573541892
Superpathway of Serine and Glycine Biosynthesis I	2.71219810946507
Neurotrophin/TRK Signaling	0.315583638471425	2.38199680617671
Sphingosine-1-phosphate Signaling	0.544116677675691	2.13043608132995
MSP-RON Signaling Pathway	0.43828362108607594	2.22666411132136
ILK Signaling	0.582482184086109	2.08243738709635
Calcium-induced T Lymphocyte Apoptosis		2.65588758043319
TR/RXR Activation		2.64117954619718
cAMP-mediated signaling	2.26095674058463	0.350292789289039
IL-6 Signaling		2.60634501563998
Role of Osteoblasts, Osteoclasts and Chondrocytes in Rheumatoid Arthritis	0.45642259446881	2.14432763151294
Role of Macrophages, Fibroblasts and Endothelial Cells in Rheumatoid Arthritis	1.19634594891214	1.40350407871059
Telomerase Signaling	0.21305170558644201	2.37732947067949
IGF-1 Signaling	0.21035201855280203	2.35526293014852
Caveolar-mediated Endocytosis Signaling	0.29377826728610706	2.24865375241898
eNOS Signaling	0.833594773415108	1.68818187936556
GPCR-Mediated Integration of Enteroendocrine Signaling Exemplified by an L Cell	1.5036408035192	1.00348715590206
Chemokine Signaling	0.843702973852488	1.64518802238132
Nur77 Signaling in T Lymphocytes	0.403276776374314	2.06822566163837
IL-17A Signaling in Airway Cells		2.46803811992416
CD40 Signaling		2.46803811992416
Glioblastoma Multiforme Signaling	0.380450959222522	2.0785930207806
SAPK/JNK Signaling		2.4453347726379
Role of NFAT in Cardiac Hypertrophy	0.2870735411635911	2.15267811866022
PDGF Signaling	0.27398878346489897	2.12637411460369
Small Cell Lung Cancer Signaling	0.813912416189754	1.58430688729333
Hepatic Fibrosis / Hepatic Stellate Cell Activation	-0.0	2.38880990213182
Erythropoietin Signaling		2.38199680617671
Autoimmune Thyroid Disease Signaling		2.36902576889489
Melanoma Signaling		2.36902576889489
Lymphotoxin β Receptor Signaling	0.384295990244816	1.98191210763727
p53 Signaling		2.33348667443699
Growth Hormone Signaling		2.32722666667538
Renal Cell Carcinoma Signaling		2.32722666667538
Graft-versus-Host Disease Signaling		2.29592123245176
IL-3 Signaling		2.27438578141631
Glioma Invasiveness Signaling	0.366627354357712	1.9012603891998
Thrombin Signaling	0.2604401467392641	2.00173462639925
Acute Myeloid Leukemia Signaling	0.767649645058085	1.4898476136316
IL-17 Signaling		2.24865375241898
JAK/Stat Signaling		2.24865375241898
Primary Immunodeficiency Signaling		2.22666411132136
NF-κB Activation by Viruses		2.2233631664886
LPS/IL-1 Mediated Inhibition of RXR Function	-0.0	2.2224061593462
Aldosterone Signaling in Epithelial Cells	0.73346655990401	1.4802516302202
HGF Signaling		2.20859648080471
Bupropion Degradation		2.20792431307362
Antiproliferative Role of Somatostatin Receptor 2	0.350133117038813	1.82567019574499
Relaxin Signaling	0.429964402608764	1.73108940761005
Insulin Receptor Signaling	0.882867615359832	1.27753581352317
Acetone Degradation I (to Methylglyoxal)		2.15745222105953
Prostate Cancer Signaling	0.733368734403593	1.41992041054393
fMLP Signaling in Neutrophils	-0.0	2.14961606703632
Dopamine-DARPP32 Feedback in cAMP Signaling	1.16289770347896	0.982652614116207
Pancreatic Adenocarcinoma Signaling	0.555290260344459	1.57519032497903
CNTF Signaling		2.12926019027949
Granulocyte Adhesion and Diapedesis	0.316810863149547	1.79228120310882
Gαq Signaling	-0.0	2.0785930207806
Cardiac Hypertrophy Signaling	-0.0	2.06940346453191
Ceramide Signaling		2.05770645208404
Chronic Myeloid Leukemia Signaling	0.22429892314828404	1.81277643512566
Angiopoietin Signaling	0.324940704221176	1.70958242476625
Threonine Degradation II	2.00898058959432
Glioma Signaling	0.218583582247574	1.77598747064076
Methionine Degradation I (to Homocysteine)	1.98038234019578
Cellular Effects of Sildenafil (Viagra)	1.47186091065346	0.504959965878856
Melanocyte Development and Pigmentation Signaling		1.97108071092495
Gα12/13 Signaling		1.96777386536448
Agranulocyte Adhesion and Diapedesis	0.289642177373644	1.66708886891364
ErbB Signaling		1.95024694359259
Heparan Sulfate Biosynthesis (Late Stages)	1.9365205616258
RANK Signaling in Osteoclasts		1.92972628717869
3-phosphoinositide Biosynthesis	0.373453260442897	1.52916861792398
PAK Signaling		1.88959464393703
FLT3 Signaling in Hematopoietic Progenitor Cells	0.2979686439851871	1.58430688729333
Cysteine Biosynthesis III (mammalia)	1.88043584353517
ErbB4 Signaling		1.87552812716668
IL-8 Signaling	0.269792261424925	1.57428304321768
Superpathway of Methionine Degradation	1.43361988102463	0.408738163832662
CDK5 Signaling	1.14460018507803	0.693532479254764
Thiamin Salvage III		1.80093577782311
Glutamine Biosynthesis I		1.80093577782311
Gustation Pathway	1.53979734285337	0.25231660388352
Maturity Onset Diabetes of Young (MODY) Signaling	1.79192844877733
GM-CSF Signaling		1.77783363453557
Heparan Sulfate Biosynthesis	1.7771370408424
VEGF Family Ligand-Receptor Interactions	0.277798842470489	1.4898476136316
Intrinsic Prothrombin Activation Pathway	0.617883264636506	1.14277433940954
PXR/RXR Activation		1.75463144334633
CREB Signaling in Neurons	-0.0	1.74090982555733
Estrogen Biosynthesis		1.72070599862906
Polyamine Regulation in Colon Cancer	1.71261590623779
Putrescine Biosynthesis III	1.7100710254491
Glutamine Degradation I	1.7100710254491
Superpathway of Inositol Phosphate Compounds	0.569510593970249	1.13947565253687
Colanic Acid Building Blocks Biosynthesis		1.6987796642411
Inhibition of Angiogenesis by TSP1	0.56798622198754	1.04240351841145
FGF Signaling	0.24587733382505397	1.33874033415025
PEDF Signaling		1.58430688729333
MIF Regulation of Innate Immunity		1.57158054110248
Role of Tissue Factor in Cancer	-0.0	1.5598475139439
Glutathione Redox Reactions I		1.53776412190745
Tyrosine Biosynthesis IV	1.53609680718586
S-adenosyl-L-methionine Biosynthesis	1.53609680718586
Trehalose Degradation II (Trehalase)	1.53609680718586
γ-glutamyl Cycle	0.862266677448744	0.672128708896933
Eicosanoid Signaling	0.920097453826011	0.600126959910008
Regulation of eIF4 and p70S6K Signaling	0.391241813893651	1.12383152459984
Colorectal Cancer Metastasis Signaling	0.718007651871692	0.794403864096342
VEGF Signaling	0.23323495570866803	1.27826589230504
GDP-L-fucose Biosynthesis I (from GDP-D-mannose)		1.50334178742737
Taurine Biosynthesis		1.50334178742737
Sulfate Activation for Sulfonation		1.50334178742737
Signaling by Rho Family GTPases		1.4897529108216
Molecular Mechanisms of Cancer	0.558643147643923	0.93000855768545
Gαi Signaling	0.94395648033105	0.529668768654637
CCR3 Signaling in Eosinophils	-0.0	1.47174922337823
Notch Signaling	0.514976828716808	0.936293656079833
Mouse Embryonic Stem Cell Pluripotency	0.218583582247574	1.20767205945762
Tec Kinase Signaling	-0.0	1.42170659050479
Germ Cell-Sertoli Cell Junction Signaling	-0.0	1.42170659050479
Phenylalanine Degradation I (Aerobic)	1.41327172021646
NAD Biosynthesis III	1.41327172021646
PTEN Signaling	-0.0	1.40314687377532
HMGB1 Signaling		1.40314687377532
Cardiac β-adrenergic Signaling	1.38763749203154	-0.0
Communication between Innate and Adaptive Immune Cells		1.38665993064357
Neuroprotective Role of THOP1 in Alzheimer's Disease	0.487103319929018	0.880727056978388
tRNA Splicing	1.33753918039244
Lysine Degradation V	1.31847196521301
Protein Citrullination	1.31847196521301
NAD Salvage Pathway III	1.31847196521301
Bladder Cancer Signaling	1.2804972467583	-0.0
Crosstalk between Dendritic Cells and Natural Killer Cells		1.27826589230504
NAD Salvage Pathway II	0.728525309472285	0.545725038323777
Sperm Motility	1.00213240439973	0.27091145337713407
Ovarian Cancer Signaling	-0.0	1.25409738767377
Thyroid Cancer Signaling	1.25318472473365
Human Embryonic Stem Cell Pluripotency	0.434087044357303	0.812419887701296
GDP-glucose Biosynthesis	1.24139758516745
NAD Biosynthesis from 2-amino-3-carboxymuconate Semialdehyde	1.24139758516745
AMPK Signaling	-0.0	1.23117844791433
IL-17A Signaling in Gastric Cells		1.2298652435064
Glutathione-mediated Detoxification		1.2298652435064
Dopamine Receptor Signaling	0.758864123145478	0.46274608291002
Creatine-phosphate Biosynthesis		1.20915677550136
L-cysteine Degradation I		1.20915677550136
Arsenate Detoxification I (Glutaredoxin)		1.20915677550136
Thyroid Hormone Metabolism II (via Conjugation and/or Degradation)		1.19953588326231
Glucose and Glucose-1-phosphate Degradation	1.17655426910898
Huntington's Disease Signaling	-0.0	1.16515704633442
Protein Kinase A Signaling	1.14100166790617	-0.0
Phospholipase C Signaling	-0.0	1.12567344499624
Citrulline Biosynthesis	1.12066240292198
Airway Pathology in Chronic Obstructive Pulmonary Disease	1.12066240292198
HIPPO signaling	0.693534902472152	0.408929862202072
GPCR-Mediated Nutrient Sensing in Enteroendocrine Cells	0.252533923720606	0.841180016346547
Calcium Transport I	1.07160656822835
UDP-N-acetyl-D-galactosamine Biosynthesis II	1.07160656822835
mTOR Signaling	0.272188251609922	0.789542652415267
Phospholipases	0.384295990244816	0.677337621890601
Synaptic Long Term Potentiation	0.502223991466596	0.555768306638826
NGF Signaling		1.05768714792333
Type I Diabetes Mellitus Signaling	-0.0	1.05768714792333
Agrin Interactions at Neuromuscular Junction		1.04684997248512
GDP-mannose Biosynthesis		1.03987445960415
Superoxide Radicals Degradation		1.03987445960415
Glycine Betaine Degradation	1.02794237207116
Glutamate Receptor Signaling	0.372380065077218	0.653946630637784
Role of NANOG in Mammalian Embryonic Stem Cell Pluripotency	-0.0	1.02391887350819
MIF-mediated Glucocorticoid Regulation		1.01964039532944
Hereditary Breast Cancer Signaling		0.991472250015856
Cytotoxic T Lymphocyte-mediated Apoptosis of Target Cells	0.579755867145283	0.408738163832662
Type II Diabetes Mellitus Signaling	-0.0	0.970539218070986
p38 MAPK Signaling	0.96831461937733
Ephrin B Signaling		0.962549036331237
Systemic Lupus Erythematosus Signaling		0.954037965498136
Antioxidant Action of Vitamin C	0.218583582247574	0.72951124242328
Glucocorticoid Receptor Signaling	-0.0	0.935366568382857
NAD biosynthesis II (from tryptophan)	0.920258540582339
Hypoxia Signaling in the Cardiovascular System	0.334695710461162	0.580274061809929
Sertoli Cell-Sertoli Cell Junction Signaling	0.618794171800577	0.286168650282731
Superpathway of Citrulline Metabolism	0.890153576124704
Wnt/β-catenin Signaling	0.313967384132335	0.571136212523314
NF-κB Signaling		0.884129329973608
Pathogenesis of Multiple Sclerosis		0.873929034343104
Prostanoid Biosynthesis		0.873929034343104
GABA Receptor Signaling	0.320213992263105	0.552096840868589
Leukotriene Biosynthesis	0.862266677448744
Aryl Hydrocarbon Receptor Signaling	0.417879657306136	0.443437518391806
GNRH Signaling	-0.0	0.846702495077743
Granzyme B Signaling	0.836310884226383
Parkinson's Signaling	0.836310884226383
Ephrin Receptor Signaling	0.29750495056818094	0.538289419355447
Ketogenesis		0.831535467573393
Netrin Signaling	0.49610717089395	0.334115765557652
iNOS Signaling		0.830130420772958
D-myo-inositol-5-phosphate Metabolism	0.826848075994153	-0.0
α-Adrenergic Signaling		0.819342693568716
Regulation of Actin-based Motility by Rho		0.798225238024104
Regulation of the Epithelial-Mesenchymal Transition Pathway	-0.0	0.789542652415267
STAT3 Pathway	0.289668331472132	0.492944529399315
Serotonin Receptor Signaling	0.461649148140579	0.304038632206084
Mevalonate Pathway I		0.759055041836104
Endoplasmic Reticulum Stress Pathway	0.728525309472285
D-myo-inositol (3,4,5,6)-tetrakisphosphate Biosynthesis	0.482819447746003	0.245278173009234
D-myo-inositol (1,4,5,6)-Tetrakisphosphate Biosynthesis	0.482819447746003	0.245278173009234
Guanosine Nucleotides Degradation III		0.727629834222629
Bile Acid Biosynthesis, Neutral Pathway		0.727629834222629
Chondroitin Sulfate Degradation (Metazoa)		0.727629834222629
Choline Biosynthesis III		0.727629834222629
Regulation of IL-2 Expression in Activated and Anergic T Lymphocytes	0.270248646197986	0.45556090585134
TNFR1 Signaling	0.430911450297576	0.277594235215022
Serotonin Degradation		0.701917576214374
Dermatan Sulfate Degradation (Metazoa)		0.698773043663862
Urate Biosynthesis/Inosine 5'-phosphate Degradation		0.698773043663862
IL-22 Signaling	0.676680875977599
Tumoricidal Function of Hepatic Natural Killer Cells	0.676680875977599
Estrogen-mediated S-phase Entry	0.676680875977599
Amyloid Processing	0.409922601570748	0.259768178934423
Regulation of Cellular Mechanics by Calpain Protease		0.665499112471498
Pyrimidine Ribonucleotides Interconversion	0.660994493054767
CD27 Signaling in Lymphocytes	0.403276776374314	0.254165769806418
Superpathway of Geranylgeranyldiphosphate Biosynthesis I (via Mevalonate)		0.647409871586172
Adenosine Nucleotides Degradation II		0.647409871586172
D-myo-inositol (1,4,5)-Trisphosphate Biosynthesis	0.646000144579655
Antiproliferative Role of TOB in T Cell Signaling	0.646000144579655
Semaphorin Signaling in Neurons	0.396794580942599	0.248721580798478
Neuregulin Signaling	0.242634953646686	0.40275244151301
Calcium Signaling	0.633093620510619	-0.0
IL-15 Production	0.631645326388362
Pyrimidine Ribonucleotides De Novo Biosynthesis	0.631645326388362
Ethanol Degradation IV		0.624381818953494
Tight Junction Signaling	0.313967384132335	0.309948710354976
ATM Signaling		0.620903446336745
Corticotropin Releasing Hormone Signaling		0.620139594647804
Hepatic Cholestasis		0.618330427152837
Wnt/Ca+ pathway	0.378267916378828	0.23327656737950603
Activation of IRF by Cytosolic Pattern Recognition Receptors		0.610395773861658
Differential Regulation of Cytokine Production in Macrophages and T Helper Cells by IL-17A and IL-17F		0.602850123469173
Retinoate Biosynthesis I	0.591974276057674
PCP pathway		0.590088945631388
Purine Nucleotides Degradation II (Aerobic)		0.582651920543676
G Protein Signaling Mediated by Tubby	0.579755867145283
Induction of Apoptosis by HIV1	0.355508334664622	0.21455067757611604
DNA Methylation and Transcriptional Repression Signaling		0.563649426352419
TWEAK Signaling	0.556637509388472
CCR5 Signaling in Macrophages		0.543104754689262
EIF2 Signaling		0.538289419355447
RhoGDI Signaling		0.538289419355447
IL-10 Signaling		0.534302496729531
RAR Activation	-0.0	0.533013826385063
RhoA Signaling		0.529668768654637
TREM1 Signaling		0.525684278215753
PI3K/AKT Signaling	-0.0	0.523365056029916
Cholecystokinin/Gastrin-mediated Signaling	0.19997278132656504	0.322155554792561
Differential Regulation of Cytokine Production in Intestinal Epithelial Cells by IL-17A and IL-17F		0.512719364143777
tRNA Charging	0.505393262049068
Toll-like Receptor Signaling		0.500879658186974
Lipid Antigen Presentation by CD1		0.497473921734944
Role of PKR in Interferon Induction and Antiviral Response	0.487103319929018
Dermatan Sulfate Biosynthesis (Late Stages)	0.469886932928076
Cell Cycle Control of Chromosomal Replication		0.455981456325463
Superpathway of Cholesterol Biosynthesis		0.455981456325463
Chondroitin Sulfate Biosynthesis (Late Stages)	0.453642924988573
Synaptic Long Term Depression	-0.0	0.443437518391806
TNFR2 Signaling		0.44338927857268795
3-phosphoinositide Degradation	0.410051778723498	-0.0
4-1BB Signaling in T Lymphocytes		0.408738163832662
Chondroitin Sulfate Biosynthesis	0.396794580942599
Unfolded protein response	0.39046965376332193
Dermatan Sulfate Biosynthesis	0.378267916378828
IL-1 Signaling		0.37349258481837605
Coagulation System		0.368643400493577
IL-17A Signaling in Fibroblasts		0.368643400493577
Retinoic acid Mediated Apoptosis Signaling	0.355508334664622
Protein Ubiquitination Pathway	0.342379428638809	-0.0
April Mediated Signaling		0.3422928948686719
Cell Cycle: G1/S Checkpoint Regulation	0.334695710461162
Mitotic Roles of Polo-Like Kinase	0.334695710461162
ERK5 Signaling	0.334695710461162
Transcriptional Regulatory Network in Embryonic Stem Cells		0.326215373791222
B Cell Activating Factor Signaling		0.326215373791222
Remodeling of Epithelial Adherens Junctions	0.320213992263105
Role of Hypercytokinemia/hyperchemokinemia in the Pathogenesis of Influenza		0.318577619907929
Mechanisms of Viral Exit from Host Cells		0.318577619907929
Role of RIG1-like Receptors in Antiviral Innate Immunity		0.318577619907929
PPARα/RXRα Activation	-0.0	0.313510570795031
Mitochondrial Dysfunction	-0.0	0.313510570795031
UVC-Induced MAPK Signaling		0.311189424458322
Melatonin Signaling	0.311046689954169	-0.0
Basal Cell Carcinoma Signaling	0.306600323207951
Gαs Signaling	-0.0	0.29105023146800396
Role of Oct4 in Mammalian Embryonic Stem Cell Pluripotency		0.29040475686105005
BMP signaling pathway	0.285636558413371	-0.0
nNOS Signaling in Neurons		0.283901265851023
Cell Cycle: G2/M DNA Damage Checkpoint Regulation		0.265535546639489
Apoptosis Signaling	0.236315081857798	-0.0
Factors Promoting Cardiogenesis in Vertebrates	0.23323495570866803
Actin Nucleation by ARP-WASP Complex		0.22840517451562098
Death Receptor Signaling	0.22722806590812597	-0.0
Salvage Pathways of Pyrimidine Ribonucleotides	0.22141779368692
Role of MAPK Signaling in the Pathogenesis of Influenza		-0.0
Adipogenesis pathway		-0.0
PPAR Signaling		-0.0
TGF-β Signaling		-0.0
Androgen Signaling		-0.0
Epithelial Adherens Junction Signaling	-0.0

## Sheet: Upstream Reg. Comparison 3-fold
© 2000-2015 QIAGEN. All rights reserved.
Upstream regulators	Downreg genes 012015 - 2015-01-25 08:52 PM	DE_Ptf1a_cKO 2wk-3KO_edgeR 01-08-2015 UP - 2015-01-25 08:45 PM
TNF		8.11322886825345
ERK1/2	1.7857067881592	5.34893471267522
TGFB1		6.32429446855244
IFNG		6.2606191141966
SMARCA4		6.09471016249417
USF1		6.0913295018397
CEBPA		5.93071689359557
ESR1	1.86874799224831	3.42393476921417
SIN3A	1.74624100293131	3.4852301897358
RELA		5.16043089909796
MAP3K7		5.11432334304599
TGM2		5.0255658842191
MEMO1	2.66386163784299	2.24359860361137
SMC3		4.90280755655527
IL27		4.86307891046894
TAB1		4.84291505826984
IL1B		4.7420434533915
RFX5		4.68228480644433
ALB		4.50963945017083
CDK9	1.90618200877275	2.58976521335705
Ap1	1.45205390525318	2.87071005195471
ERK	1.42400891902534	2.87615038510331
HNF1A	1.61268634007742	2.65397087662585
FOXO1		4.24282195037424
STAT1		4.09889062577231
HISTONE	1.35539399334832	2.6780495109867
RFXAP		3.97510511954183
SP1		3.89048310695385
EPAS1		3.75087642909171
KIAA1524	3.72783596200146
TREM1		3.67732315709508
RFXANK		3.66529620962241
DAB2IP		3.66529620962241
ERBB2		3.65657736784894
ERN1		3.64649417781392
EBI3		3.64527996399787
IL13		3.45751133655551
TCR		3.45030716444458
TCF4		3.41108263695117
HNRNPA1	3.32257343688294
EHF		3.30675293524101
SOX11		3.23897754471995
Hdac		3.2082296004666
FGF21		3.19243116775725
ENTPD5		3.19243116775725
MAPK1		3.16498470181406
MITF		3.08690248539452
TCF		3.07926389221865
PDGF BB		3.04886459049527
MYC		2.98027178092229
NFkB (complex)		2.95464701982687
CTNNB1		2.94951809092941
Hedgehog	2.92978459988257
SMO	2.92978459988257
CYP2E1		2.89565227624028
APLN		2.89565227624028
Alpha catenin	2.78622939078195
FBXW7	2.78622939078195
PRKCD		2.77366177739518
CDX2		2.72751337236789
Pkc(s)		2.68282719492915
CREBBP		2.68282719492915
PSMD4		2.6780495109867
ZBTB7B		2.6780495109867
SATB1		2.66860581231701
UGT2B15	2.66386163784299
UGT2B17	2.66386163784299
P38 MAPK		2.65397087662585
NFKB1		2.5999859885188
CREB1		2.59752160582393
SIN3B		2.58976521335705
RAD21		2.52390465532591
PML		2.50619910546127
AGT		2.50619910546127
DNAJB6		2.50619910546127
FGFR2		2.50619910546127
IL1RN		2.48482180189283
GLI2	2.4629435836129
POU2F1		2.46167488153174
HIF1A		2.4072193674472
BRCA1		2.40486445227327
USF2		2.40271930778388
ETS		2.36430678143027
SMAD1		2.36430678143027
ADRB2		2.36430678143027
HLX		2.34673145450923
HDAC6		2.34673145450923
AR		2.27603982187403
PRKCA		2.26841886974713
NLRP12		2.24359860361137
IRF8		2.24359860361137
FANCC		2.20516236897331
IGF1R		2.19408542097369
CARM1	2.16736533264053
BCL6		2.14485673801997
MNT		2.13867952916146
ITGB2		2.13867952916146
Tgf beta		2.13867952916146
RNA polymerase II		2.12761552764819
TLR3		2.11715558664531
IFNA2		2.11715558664531
TRIB3	2.10777543678749
AHR		2.10310294469681
RUNX1		2.10310294469681
HNRNPA2B1	2.09833392070321
SP3		2.09563442491746
SMAD4		2.07443447584987
KLF10	2.04660389545539
ERF	2.04660389545539
RPS14	2.04660389545539
PTRF	2.04660389545539
TDG	2.04660389545539
Cofilin	2.04660389545539
MED26	2.04660389545539
CXCL2	2.04660389545539
SSBP2	2.04660389545539
CTNNBIP1	2.04660389545539
CDK11B	2.04660389545539
miR-185-3p (and other miRNAs w/seed GGGGCUG)	2.04660389545539
RNF14	2.04660389545539
NCOA5	2.04660389545539
GTF2I	2.04660389545539
ZMIZ1	2.04660389545539
RPS20	2.04660389545539
ITGB5	2.04660389545539
PRKACB	2.04660389545539
GLIPR1	2.04660389545539
TOP2A	2.04660389545539
CDC45	2.04660389545539
RPL21	2.04660389545539
MYH9	2.04660389545539
MNK1/2	2.04660389545539
FLT4	2.04660389545539
CXCR2	2.04660389545539
EEF1A1	2.04660389545539
Rxr		2.04598973637842
KDM1A		2.04598973637842
MTA3		2.04598973637842
EIF2AK2		2.03220201672081
IL21		2.03220201672081
EGR1		2.01929457244378
CNOT7		1.97977240796914
LY6E		1.96305459531613
NFIX		1.96305459531613
PIK3R1		1.96305459531613
FGF2		1.94169832241492
TGFBR2		1.9288997951199
DICER1		1.9288997951199
HIC1		1.9288997951199
IFNL1		1.9288997951199
TP63		1.92860203097048
FOSL2		1.88808318746427
SYVN1		1.86775334360211
YBX1	1.86297318623783
DMTF1		1.83193373047653
mir-493		1.83193373047653
SHP		1.83193373047653
TNFRSF10A		1.83193373047653
cAMP-Gef		1.83193373047653
ALG8		1.83193373047653
PRPF4		1.83193373047653
ALG6		1.83193373047653
ACOT8		1.83193373047653
PRR13		1.83193373047653
ALG5		1.83193373047653
GPBP1		1.83193373047653
SNCG		1.83193373047653
ALG10		1.83193373047653
BRMS1		1.83193373047653
PA2G4		1.83193373047653
mir-196		1.83193373047653
RACGAP1		1.83193373047653
G protein		1.83193373047653
MGAT4C		1.83193373047653
Adaptor protein 2		1.83193373047653
ZBTB32		1.83193373047653
ASB9		1.83193373047653
ABHD5		1.83193373047653
miR-18a-5p (and other miRNAs w/seed AAGGUGC)		1.83193373047653
Mannosidase2		1.83193373047653
AGTR1		1.83193373047653
p70 S6k		1.83193373047653
DDOST		1.83193373047653
PRMT6		1.83193373047653
ITPR		1.83193373047653
MOGS		1.83193373047653
miR-196a-5p (and other miRNAs w/seed AGGUAGU)		1.83193373047653
GH1		1.81973715129389
BMP2	1.78320651227747
MGEA5		1.7592305153194
VDR		1.75698977467814
AMPK		1.75698977467814
ATF1		1.75698977467814
RPL15	1.74751820224823
EIF4F	1.74751820224823
KDM4C	1.74751820224823
PCYT1A	1.74751820224823
LIMK1	1.74751820224823
AIRE	1.74751820224823
DACH1	1.74751820224823
RPA2	1.74751820224823
FTH1	1.74751820224823
FAM103A1	1.74751820224823
GLRX3	1.74751820224823
MTBP	1.74751820224823
RPRD1B	1.74751820224823
NUBP1	1.74751820224823
FTL	1.74751820224823
PRKACA	1.74751820224823
ENO1	1.74751820224823
PXN	1.74751820224823
AFF4	1.74751820224823
BCAS3	1.74751820224823
FIGF	1.74751820224823
PMEPA1	1.74751820224823
P2RY2	1.74751820224823
miR-375-3p (and other miRNAs w/seed UUGUUCG)	1.74751820224823
RFX3	1.74751820224823
PI3K (complex)		1.74560268265244
Ifn gamma		1.69903605228034
SMARCD3		1.69903605228034
ESRRG		1.69903605228034
T		1.69903605228034
IL6		1.691770325765
LGALS3		1.67971537825982
ELF4		1.64523305032536
ELK1		1.64523305032536
ITGAV		1.64523305032536
NR3C1		1.62417387925465
estrogen receptor		1.62081839865508
IgG		1.60041496427252
ZNF217	1.59937757372413
GATA4		1.59704601018291
IRF2		1.59505908306018
NCR2		1.59505908306018
NKX3-1	1.57336839463559
JUP	1.57336839463559
MAP3K11	1.57336839463559
RGS3	1.57336839463559
ATAD2	1.57336839463559
ACTL6A	1.57336839463559
FKBP5	1.57336839463559
Cpla2	1.57336839463559
IREB2	1.57336839463559
URI1	1.57336839463559
ABCB7	1.57336839463559
MRE11A	1.57336839463559
ZMIZ2	1.57336839463559
CCND3	1.57336839463559
HNRNPK	1.57336839463559
MAF	1.57336839463559
Histone h3		1.56145392122754
KAT5	1.55232888868162
JUND		1.54808499514116
SPI1		1.54567810013048
SARM1		1.5341025581926
DDR1		1.5341025581926
CACTIN		1.5341025581926
CALR		1.5341025581926
CLCA1		1.5341025581926
NELFA		1.5341025581926
HLA-B		1.5341025581926
mir-192		1.5341025581926
SMPD1		1.5341025581926
MEF2A		1.5341025581926
CUL4A		1.5341025581926
MGAT5		1.5341025581926
TRAF7		1.5341025581926
RAPGEF3		1.5341025581926
ABCB6		1.5341025581926
SRY		1.5341025581926
RNF187		1.5341025581926
miR-24-3p (and other miRNAs w/seed GGCUCAG)		1.5341025581926
KLB		1.5341025581926
mir-183		1.5341025581926
ARRB1		1.5341025581926
GABBR2		1.5341025581926
NODAL		1.5341025581926
RRM2		1.5341025581926
GJA1		1.5341025581926
PAF1		1.52101519465424
STAT3		1.51545359472572
RELB		1.50395347905355
TNFSF10		1.50395347905355
GATA2		1.50395347905355
NFKB2		1.50395347905355
TERT	1.47668206847794
CXCL8	1.47668206847794
Creb		1.4735829925147
MYD88		1.46236387044204
PPARD		1.46236387044204
NOTCH1	1.45205390525318
ESR2	1.45205390525318
CD28	1.45100540655804
EGF		1.45075995789599
PPARG		1.45075995789599
IRF4		1.45075995789599
HTATIP2	1.45036825807456
SFPQ	1.45036825807456
OBSCN	1.45036825807456
FLT3	1.45036825807456
RCHY1	1.45036825807456
CDC37	1.45036825807456
CBX4	1.45036825807456
ACO1	1.45036825807456
PNPT1	1.45036825807456
FUT8	1.45036825807456
mir-320	1.45036825807456
SP2	1.45036825807456
Nc2	1.45036825807456
SNRK	1.45036825807456
RBCK1	1.45036825807456
XAF1	1.45036825807456
SRF		1.44933258069307
SBDS		1.43327123711301
FOXO3		1.42849925432661
FOXA2		1.42306076663059
CD40LG	1.39780186110739
YY1		1.38582536907264
CDKN1A		1.38557458807918
PDLIM2		1.37143249716619
MAPK7		1.36120231514912
KLHL2		1.36120231514912
ADAM17		1.36120231514912
CYBB		1.36120231514912
COL2A1		1.36120231514912
Collagen type I		1.36120231514912
POU2F2		1.36120231514912
Ifn		1.36120231514912
AP2M1		1.36120231514912
N4BP1		1.36120231514912
HERC5		1.36120231514912
FGF19		1.36120231514912
MAP3K3		1.36120231514912
FOSB		1.36120231514912
HTR7		1.36120231514912
mir-31		1.36120231514912
Integrin		1.36120231514912
SPHK2		1.36120231514912
MTDH		1.36120231514912
IL17RA		1.36120231514912
WHSC1		1.36120231514912
COL1A1		1.36120231514912
MAPK12		1.36120231514912
INSR		1.36120231514912
PRR7		1.36120231514912
SP7		1.36120231514912
EIF2AK4		1.36120231514912
PLD1	1.35539399334832
PKM	1.35539399334832
PELP1	1.35539399334832
ERVW-1	1.35539399334832
PIM2	1.35539399334832
DAXX	1.35539399334832
MS4A1	1.35539399334832
mir-221	1.35539399334832
GNE	1.35539399334832
MKNK1	1.35539399334832
RASSF1	1.35539399334832
HSP90AA1	1.35539399334832
WWOX	1.35539399334832
PHB	1.35539399334832
CTR9	1.35539399334832
NFATC1	1.35539399334832
DRAP1		1.35046880270906
MYB		1.35046880270906
PRKCE		1.31682689369807
BCR (complex)		1.30555105005439
